# Supplementary material
Source: Research Square preprint supplement (doi:10.21203/rs.3.rs-9391188/v1)
Supplement: Supplementary file 1 [file 2d63c6a053f395c6bea604b7.xlsx]

## Sheet: Sheet1
		Resistance capacity												Recovery capacity				Reconfiguration capacity
		Productivity resilience					Ecological resilience				Economic resilience			Recovery resilience				Innovation resilience
ID	YEAR	Total sown area of crops	Number of employees in the primary industry	Cultivated land irrigated area	Farm machinery production	Grain yield	Fertilizer application	Pesticide application	Usage of agricultural plastic films	Affected area	Agricultural, forestry, livestock, andfishery output	Proportion of primary industry added value in local gross domestic product	Per capita disposable income of rural residents	Multiple-cropping index	Insurance premium income of agricultural insurance	Investment in agricultural fixed assets	Agriculture, forestry and water expenditure	Number of agricultural patents	Expenditure on agricultural science and technology	Rural electricity consumption	Number of leading enterprises in agriculture-related sectors
Beijing	2011	302.58	58.05	209.33	265.197	121.8	13.84	0.3936	1.3268	56.1	363.138	0.00838485	13742	1.44547	430.8	6.5	1873400	2505	22581	45.4009	176			9366439	0.00241084
Beijing	2012	282.715	56.32	207.54	241.1	113.8	13.67	0.3879	1.2549	71.2	395.713	0.00840073	15365	1.36222	512.61	7.7	2226932	2791	170585	47.3121	183			10633640	0.016042
Beijing	2013	242.455	55.4	153.02	207.72	96.1	12.7809	0.3864	1.2356	26.9	421.783	0.0081729	17101	1.58447	558.06	2	2976191	3543	1.20441e+06	48.53	183			11850469	0.101634
Beijing	2014	196.104	52.4	143.11	195.76	63.9	11.6398	0.3603	1.0903	53.3	420.067	0.00745353	18867.3	1.3703	451.61	3.3	3436680	3690	685741	50.56	187			12687953	0.0540466
Beijing	2015	173.73	50.3	137.35	186.05	62.6	10.5284	0.3174	1.0402	6.2	368.237	0.00609222	20568.7	1.26487	574.05	1.7	4247800	4285	1.53835e+06	51.67	190			13840231	0.11115
Beijing	2016	151.363	49.6	128.47	144.45	52.8	9.653	0.3031	0.9867	34.7	338.063	0.00505627	22309.5	1.1782	600.12	1.7	4435500	4710	1.30278e+06	54.71	191			14845762	0.0877541
Beijing	2017	120.939	48.4	115.479	133.51	41.1	8.5494	0.2726	0.8973	6.7	308.317	0.00429842	24240.5	1.04728	638.74	2.5	5183464	5302	1.92016e+06	61.5078	191			15796512	0.121556
Beijing	2018	103.789	45.4	109.672	125.654	34.1	7.2934	0.2574	0.8243	4.7	296.769	0.00391458	26490.3	0.946358	777.2	1	5760413	5338	4.14377e+06	65.137	191			18707701	0.221501
Beijing	2019	88.55	42.4	109.243	122.842	28.8	6.1727	0.2257	0.7699	2.5	281.704	0.00321419	28928.4	0.810578	815.78	0.9	5846243	5903	45458.2	67.7672	191			22335870	0.00203521
Beijing	2020	98.183	41.3	109.35	120.22	30.5	6.0626	0.2149	0.7562	2	263.432	0.00298068	30125.7	0.897878	993.66	5.1	4973300	6803	920999	69.3446	191			23265793	0.039586
Beijing	2021	117.847	27	109.4	121.246	37.8	6.29715	0.2334	0.7174	15	269.514	0.00276387	33302.7	1.07721	1304.92	4.9	4978660	6068	742742	66.8803	190			26293208	0.0282485
Beijing	2022	143.813	25	112.135	121.143	45.4	6.6087	0.2	0.7	9.2	268.176	0.00267959	34753.8	1.2825	1515.22	0.9	4627897	5156	2.11305e+06	60.6272	189			28433394	0.0743157
Beijing	2023	158.978	24	118	123.944	47.8	6.74971	0.2	0.7	15.05	252.6	0.00241084	37358	1.34727	1788.64	1.3	515.53	2083	1.7446e+06	73	189			2.94707e+07	0.0591978
Tianjin	2011	467.98	65	338	583.87	161.8	24.39	0.3796	1.2568	8.1	349.485	0.0141254	11941	1.38456	57.42	8.3	917800	848	226591	51.2968	36			2977580	0.0760991
Tianjin	2012	478.97	61	337.04	568.13	163.6	24.45	0.3808	1.2401	133.6	375.624	0.0133086	13593	1.42111	93.5	5.9	1009766	1055	254744	51.6155	37			3604866	0.0706668
Tianjin	2013	473.511	56	308.87	554.18	174.7	24.34	0.3639	1.2901	7.8	412.364	0.0130487	15353	1.53304	165.48	3.6	1230282	1515	388047	69.22	37			4280921	0.0906457
Tianjin	2014	479.027	56	308.87	552.33	176	23.27	0.3642	1.2274	10.3	441.713	0.0127107	17014.2	1.5509	196.87	2.6	1349089	1638	422471	109.04	37			4646868	0.0909153
Tianjin	2015	469.024	53	308.871	546.92	184.5	21.7797	0.3528	1.0552	13.2	467.437	0.0126265	18481.6	1.51851	256.5	1.5	1560800	2142	471421	102.44	38			5101839	0.0924022
Tianjin	2016	479.169	51	306.62	469.99	200.4	21.3582	0.3307	1.1644	24	494.443	0.0123128	20075.6	1.56275	292.75	3.2	1610200	2790	219435	92.19	38			5373223	0.0408386
Tianjin	2017	439.519	48	306.62	464.65	212.3	18.0099	0.2353	1.0906	13.2	382.066	0.00910875	21753.7	1.43343	384.07	2.3	1583633	2901	753487	40.3199	38			4587227	0.164258
Tianjin	2018	429.274	45	304.66	347.98	209.7	16.9476	0.219	0.907	14.4	390.501	0.00918199	23065.2	1.40903	497.91	3.7	1657067	3401	982947	36.9145	38			4923997	0.199624
Tianjin	2019	410.271	43	304.798	359.838	223.3	16.239	0.2171	0.8096	13.2	414.355	0.0131329	24804.1	1.34604	511.27	6.9	1615128	3383	318627	39.2351	38			4629716	0.0688222
Tianjin	2020	419.171	36	299.121	365.084	228.2	15.2873	0.1997	0.7521	17	476.443	0.0149236	25690.6	1.40134	609.32	5.7	1548200	3891	488505	41.0114	38			4850116	0.10072
Tianjin	2021	437.002	34	299.1	372.484	249.9	15.6578	0.1742	0.7139	6	509.258	0.0143612	27954.5	1.46106	631.13	3.9	1480091	2809	794843	62.0397	38			5743282	0.138395
Tianjin	2022	443.511	33	293.975	370.768	256.2	15.5226	0.2	0.7	4.7	521.435	0.016743	29017.8	1.50867	653.32	1.5	1102973	2265	796810	52.4729	38			5686565	0.140121
Tianjin	2023	453.098	32	309	368.799	255.7	15.4379	0.2	0.6	26.25	511.3	0.016042	30851	1.46634	743.44	5.8	126.95	926	538450	70.9	37			5.99233e+06	0.0898566
Hebei	2011	8773.69	1485	4596.61	10349.2	3172.6	326.279	8.3006	12.3785	1383.3	4895.88	0.118525	7187	1.90873	760.47	162.3	3661000	652	157907	559.215	607			2013377	0.0784287
Hebei	2012	8781.79	1418	4603.07	10553.8	3442.6	329.33	8.4831	12.6941	1329	5340.11	0.119912	8158	1.90781	1286	152.6	4436217	800	340007	593.939	664			2457670	0.138345
Hebei	2013	8749.22	1375	4349.03	10762.7	3365	331.04	8.672	13.6006	1106.5	5832.94	0.123068	9188	2.01176	1682.9	106.6	5111085	1069	287115	616.37	713			2818551	0.101866
Hebei	2014	8713.08	1338	4404.22	10942.9	3360.2	335.61	8.6329	13.7918	1435.7	5994.79	0.117176	10186.1	1.97835	1790.25	83.4	5835187	1283	252179	631.33	768			3130881	0.0805456
Hebei	2015	8739.84	1292	4447.98	11102.8	3602.2	335.492	8.3328	13.7983	1798.8	5978.88	0.115394	11050.5	1.9649	2201.96	89.7	7124900	1776	503065	611.82	805			3508708	0.143376
Hebei	2016	8716.64	1186	4457.64	7401.97	3783	331.788	8.1691	13.8434	1447.2	6083.86	0.108911	11919.4	1.95544	2287.1	88.7	8007900	2080	10274.3	600.78	825			3834274	0.00267959
Hebei	2017	8381.65	1086	4474.67	7580.58	3829.2	321.996	7.7623	12.81	718	5373.38	0.0920141	12880.9	1.87313	2575.44	77	7829133	3085	75683.6	615.156	832			4520312	0.016743
Hebei	2018	8197.13	982	4492.33	7706.2	3700.9	312.396	6.145	10.9833	557	5707	0.0926958	14030.9	1.82469	3074.58	70.6	9062657	3771	520177	505.157	833			4997415	0.104089
Hebei	2019	8132.69	938	4482.16	7830.72	3739.2	297.269	5.7344	10.3211	314.7	6061.46	0.100228	15373.1	1.81446	3651.06	44.9	9782658	5113	296242	501.568	834			5667279	0.0522724
Hebei	2020	8089.44	815	4470.03	7965.74	3795.9	285.707	5.4289	10.3742	371	6742.49	0.107166	16467	1.80971	4942.9	55.3	9887400	6698	726915	509.798	835			6343724	0.114588
Hebei	2021	8097.2	777	4470	8096.81	3825.1	276.866	5.2691	10.2039	389	7018.67	0.0997815	18178.9	1.81145	5171.52	48.6	9247909	5486	668330	476.089	834			7454936	0.0896494
Hebei	2022	8113.99	820	4102.86	8249.08	3865.1	271.635	5.1	10.1	135.3	7667.41	0.104089	19364.2	1.97764	6405.95	33.1	8721444	5216	1.09707e+06	471.254	834			8489080	0.129233
Hebei	2023	8098.23	789	4122	8403.77	3809.9	266.426	5	10.2	643.78	7770.9	0.101634	20688	1.96464	7273.44	53.1	928.51	2112	2.07064e+06	595.9	835			9.12107e+06	0.227017
Shanxi	2011	3797.42	509	1319.85	2927.3	1193	114.567	2.8382	4.1531	1015	1207.57	0.0570783	6225	2.87715	259.26	48.4	2414500	369	2463.25	86.5984	695			1133926	0.00217232
Shanxi	2012	3808.14	517	1319.06	3056.09	1309.4	118.279	2.981	4.5864	931	1304.26	0.0576513	7064	2.88701	390.68	52.6	3096278	467	53416.3	94.9517	798			1323458	0.0403611
Shanxi	2013	3782.44	536	1382.79	3183.3	1312.8	121.02	3.0534	4.6399	1592.4	1447.01	0.0610971	7949	2.73536	472.72	54	3396864	525	46361.1	99.78	924			1549799	0.0299143
Shanxi	2014	3783.43	484	1408.17	3286.2	1330.8	119.614	3.1029	4.8381	1173.5	1530.48	0.061818	8809.44	2.68677	573.75	59	3278530	689	118712	97.08	1036			1521871	0.0780042
Shanxi	2015	3767.71	468	1460.28	3351.65	1314	118.547	3.1035	4.7864	1142.6	1522.64	0.061345	9453.91	2.58014	566.13	63.6	3944600	696	76761.4	96.83	1161			1325268	0.0579214
Shanxi	2016	3720.81	469	1487.29	1744.26	1380.3	117.072	3.055	4.8922	503.7	1534.03	0.0601345	10082.5	2.50174	636.18	72.9	4320200	1000	101366	97.52	1291			1326237	0.076431
Shanxi	2017	3577.62	458	1511.21	1376.3	1355.1	111.998	2.8831	4.9998	821.3	1418.73	0.0463125	10787.5	2.36739	778.04	71.1	4779052	1494	106784	99.2646	1418			1482347	0.0720374
Shanxi	2018	3555.16	437	1518.68	1441.09	1380.4	109.611	2.6543	4.9067	830.8	1460.64	0.0440382	11750	2.34096	941.86	70.2	5813350	1643	166707	101.416	1506			1757822	0.0948372
Shanxi	2019	3524.42	425	1519.34	1517.57	1361.8	108.409	2.5319	4.8555	1473.7	1626.54	0.0484369	12902.4	2.3197	1148.97	54	6260441	1883	177457	104.9	1578			1912215	0.0928019
Shanxi	2020	3541.51	438	1517.38	1595.26	1424.3	107.41	2.4866	4.8592	1030	1935.84	0.0536304	13878	2.33397	1552.27	48	6536800	2265	199592	109.229	1668			2110549	0.0945688
Shanxi	2021	3587.95	401	1517.4	1654.25	1421.2	105.642	2.3594	4.789	1163	2134.02	0.0569673	15308.3	2.36454	2065.13	53.1	5142286	1790	104182	156.43	1700			2518889	0.0413604
Shanxi	2022	3611.59	414	1502.01	1714.27	1464.3	103.474	2.3	4.9	372.2	2211.59	0.0522724	16322.7	2.4045	2406.17	37.9	5768666	1536	444367	156.158	1715			2737192	0.162344
Shanxi	2023	3641.72	399	1490.9	1803.54	1478.1	103.219	2.2	5.3	440.37	2291.7	0.0540466	17677	2.44263	2688.42	39.8	660.99	679	620038	194	1683			2.98176e+06	0.207943
Inner Mongolia	2011	7109.9	678.2	3072.39	3172.7	2387.5	176.938	2.4474	6.066	2036.6	2204.51	0.0909687	6942	2.31413	1700.13	72.7	3916800	410	58830.6	52.2992	76			851685	0.0690755
Inner Mongolia	2012	7153.97	655.8	3125.24	3280.56	2739.8	189.035	2.9924	6.9234	2060.7	2449.34	0.0912171	7956	2.28909	1920.62	90.1	4508331	438	106619	55.1546	81			1014468	0.105098
Inner Mongolia	2013	7211.18	632.6	2957.76	3430.57	2773	202.424	3.1332	8.0822	1733.1	2699.5	0.0945473	8985	2.43805	2784.19	69.3	4665816	533	166280	59.56	85			1171877	0.141892
Inner Mongolia	2014	7355.96	609.4	3011.88	3632.55	2753	222.668	3.0875	8.9409	1878.3	2779.81	0.0916057	9976.3	2.44232	3002.72	82.6	5176937	661	169243	63.12	87			1221346	0.138571
Inner Mongolia	2015	7567.9	584.3	3086.9	3805.11	3292.6	229.35	3.2961	9.5021	2700.8	2751.55	0.0907057	10775.9	2.45162	3135.26	72.9	6755800	772	114969	72.26	87			1360617	0.0844978
Inner Mongolia	2016	7921.9	555.9	3131.53	3331.1	3263.3	234.643	3.2339	9.5631	3629.9	2794.22	0.0903233	11609	2.52972	3206.35	79.8	7290200	834	115916	71.09	88			1475124	0.0785806
Inner Mongolia	2017	9014.22	533.5	3174.83	3483.55	3254.5	235.04	3.5618	9.4306	3917.3	2813.54	0.102494	12584.3	2.83928	3253.54	78.9	8077146	1169	179007	78.901	88			1323278	0.135275
Inner Mongolia	2018	8824.07	507.3	3196.52	3663.66	3553.3	222.672	2.9585	9.3969	2629.8	2985.32	0.10144	13802.6	2.76052	3546.11	118.2	9039647	1285	136088	85.5097	88			1292187	0.105316
Inner Mongolia	2019	8885.02	475.2	3199.19	3866.42	3652.5	218.437	2.7278	9.4194	1453.5	3176.34	0.108246	15282.8	2.77727	3964.36	105.3	8747335	1704	118811	91.1554	88			1478092	0.0803811
Inner Mongolia	2020	8882.81	443	3199.12	4056.58	3664.1	207.694	2.3426	9.5297	2368	3472.36	0.116656	16566.9	2.77664	4394.66	126.1	8675900	2381	227815	93.2132	88			1610703	0.141438
Inner Mongolia	2021	8743.34	422	3199.1	4239.42	3840.3	241.898	2.6692	10.026	1284	3815.12	0.108471	18336.8	2.73306	5388.72	134.1	8188391	2166	5253.01	119.79	88			1900595	0.00276387
Inner Mongolia	2022	8750.68	439	4379.31	4596.42	3900.6	227.364	2.5	11.5	1394.9	4316.76	0.114588	19640.9	1.99819	6747.54	117.9	9124350	2248	30088.6	103.287	88			2095130	0.0143612
Inner Mongolia	2023	8808.87	416	4809	4924.95	3957.8	220.803	2.5	12.7	2223.84	4447.3	0.11115	21221	1.83175	7465.6	120.4	982.68	1149	227649	178.1	88			2.28148e+06	0.0997815
Liaoning	2011	4145.68	699.9	1588.38	2399.89	2035.5	144.64	5.6565	14.3348	450.2	3633.63	0.0861833	8011	2.61	571.34	67.1	3292000	929	207267	366.33	113			3638348	0.0569673
Liaoning	2012	4210.57	694.7	1698.82	2526.89	2175	146.902	5.9053	14.5054	355.4	4062.43	0.0867658	9061	2.47852	743.07	73.4	4050175	938	423979	373.437	115			3908680	0.108471
Liaoning	2013	4208.76	683.8	1407.84	2631.98	2195.6	151.761	6.0035	14.6068	450.5	4349.72	0.0853126	10161	2.98951	1095.51	79	4665248	1131	397982	394.78	115			4459322	0.0892471
Liaoning	2014	4164.1	687.9	1473.97	2730.22	1753.9	151.55	6.0294	14.6207	1931.4	4498.36	0.0798471	11191.5	2.82509	1143.2	89.8	4438501	1116	510891	433.07	118			4351851	0.117396
Liaoning	2015	4219.86	689.4	1520.31	2813.86	2186.6	152.087	5.9875	14.1942	1482.8	4686.71	0.083157	12056.9	2.77567	1624.58	91	4460700	1242	845775	457.76	120			3633971	0.232741
Liaoning	2016	4064.1	705.4	1572.99	2168.45	2315.6	148.058	5.6264	13.7273	581.9	4421.78	0.0976792	12880.7	2.58368	1807.98	113.9	4807300	1398	8624.73	489.8	121			3727165	0.00231402
Liaoning	2017	4172.32	714.8	1610.55	2215.14	2330.7	145.466	5.7474	12.4791	949.6	3851.62	0.0812619	13746.8	2.59062	1984.68	105.9	4592318	1806	174459	528.006	123			4298825	0.0405829
Liaoning	2018	4207.11	711.8	1619.33	2243.72	2192.4	145.024	5.507	11.7976	1467.3	4061.93	0.0803189	14656.3	2.59807	2314.36	101.4	4617437	2235	138251	306.216	123			4600800	0.0300493
Liaoning	2019	4217.1	671.4	1629.17	2353.89	2430	139.906	5.1074	11.3505	324.7	4368.25	0.0874275	16108.3	2.58849	2823.05	142.3	5025729	3025	397757	176.972	123			5084604	0.0782278
Liaoning	2020	4287.78	631	1632.54	2471.26	2338.8	137.568	4.4722	11.4381	1322	4582.56	0.0909661	17450.3	2.62645	3600.41	156	5048300	4727	325925	184.557	121			5490052	0.0593665
Liaoning	2021	4328.94	600	1632.5	2552.6	2538.7	135.03	4.3386	11.4384	249	4927.73	0.0892471	19216.6	2.65172	3699.84	175	4094414	3930	473188	167.916	119			6004236	0.0788091
Liaoning	2022	4326.86	634	1716.63	2657.84	2484.5	130.507	4.2	11.3	797.4	5180.03	0.0896494	19908	2.52055	5089.78	164	4633392	3377	450505	130.049	118			6209177	0.0725547
Liaoning	2023	4361.42	589	1721.2	2823.85	2563.4	129.509	4.1	11.4	328.35	5266.8	0.0877541	21483	2.53394	6002.96	153.6	490.96	1319	645665	191.7	118			6.76443e+06	0.09545
Jilin	2011	5222.32	651.88	1807.52	2355.04	3171	195.199	4.5595	5.7069	616.4	2275.15	0.120869	7634	2.88922	800.68	124.2	2555700	472	83081.4	42.5072	801			891337	0.0932099
Jilin	2012	5315.14	628.98	1851.87	2554.65	3450.2	206.73	5.1239	5.67	632.8	2502.02	0.118275	8741	2.87015	883.31	171.4	2913003	497	103045	46.1174	878			1098010	0.0938474
Jilin	2013	5413.06	607.09	1510.13	2730.04	3551	216.79	5.1011	5.8485	623.2	2670.6	0.11569	9781	3.58449	926.94	186.7	3182647	617	48153.5	48.23	958			1196882	0.0402325
Jilin	2014	5615.29	586.53	1628.43	2919.09	3532.8	226.66	5.9517	5.7858	689.3	2763.01	0.11041	10780.1	3.44828	921.21	176.5	3086795	612	212169	48.75	1046			1307243	0.162302
Jilin	2015	5679.1	566.9	1790.87	3152.54	3974.1	231.24	6.2285	5.9164	846.2	2880.62	0.113508	11326.2	3.17114	1107.7	91.8	4086100	746	273943	49.6	1105			1414089	0.193724
Jilin	2016	5676.32	546.24	1832.17	3105.26	4150.7	233.607	5.8523	5.9565	748.2	2724.88	0.10141	12122.9	3.09814	1482.84	98.5	5505000	887	96235.5	51.13	1168			1396668	0.0689037
Jilin	2017	6086.2	526.54	1893.05	3284.65	4154	231.025	5.6294	6.0752	983.1	2064.29	0.073295	12950.4	3.21502	1725.51	102.4	5547674	1055	134588	52.9617	1226			1280073	0.105141
Jilin	2018	6080.89	508.58	1893.05	3466	3632.7	228.297	5.0991	5.6216	1319.7	2184.34	0.0770003	13748.2	3.21222	2024.22	115.4	5375508	1289	160378	54.8539	1253			1150255	0.139428
Jilin	2019	6117.05	489.61	1909.5	3653.74	3877.9	227.058	4.8658	5.313	536.2	2442.73	0.109776	14936	3.20348	2279.41	92.7	5643475	1375	211543	54.8765	1276			1483828	0.142566
Jilin	2020	6150.99	471.99	1905.44	3896.95	3803.2	225.294	4.693	5.1364	1219	2976	0.126144	16067	3.22813	2693.35	100.7	5777600	2010	125834	56.5596	1282			1595099	0.0788877
Jilin	2021	6187.06	454	1905.4	4149.23	4039.2	222.999	4.5139	4.7651	245	2972.32	0.117396	17641.7	3.24712	3712	132.2	4623191	1969	148482	72.3053	1282			1836516	0.0808497
Jilin	2022	6226.36	479	1906.47	4357.86	4080.8	222.746	4.4	4.6	193	3217.91	0.129233	18134.5	3.2659	4746.04	107.1	5154893	1755	249510	58.7747	1281			1872794	0.133228
Jilin	2023	6292.47	451	1949.3	4548.57	4186.5	222.496	4.2	4.6	260.77	3128	0.121556	19472	3.22807	5426.77	107.9	618.3	743	221568	87	1280			2.10238e+06	0.105389
Heilongjiang	2011	12222.9	677.71	4332.65	4097.84	5570.6	228.437	7.7958	7.5589	1536.8	3223.51	0.135233	7382	2.82112	1640.59	207.7	3559800	1045	103796	58.2411	117			1287788	0.0806004
Heilongjiang	2012	12237	667.32	4776.48	4552.93	6598.6	240.28	8.0511	8.459	2429.4	3952.31	0.154377	8367	2.56193	2215.89	211.5	4303941	1276	215153	64.3269	119			1459588	0.147407
Heilongjiang	2013	12200.8	693	5342.12	4849.28	6004.1	244.96	8.4016	8.5378	2734.1	4633.26	0.174113	9369	2.28389	2832.96	158.1	4616956	1477	4911.67	66.95	127			1647838	0.00298068
Heilongjiang	2014	12225.9	719.2	5305.2	5155.52	6242.2	251.93	8.7381	8.4424	810	4894.8	0.173635	10453.2	2.30452	2605.6	158.7	4876670	1657	24078.8	69.56	128			1613469	0.0149236
Heilongjiang	2015	12294	694.2	5530.84	5442.29	7615.8	255.31	8.2949	8.3097	1175.3	5044.93	0.174593	11095.2	2.22282	2894.8	172.6	6814800	2161	168966	72.58	129			1576677	0.107166
Heilongjiang	2016	12426.5	664.2	5932.74	5634.27	7416.1	252.75	8.2474	8.2575	4223.7	5197.75	0.173563	11831.9	2.09457	3184.24	169.6	8017700	2175	81788.9	77.47	129			1525048	0.0536304
Heilongjiang	2017	14767.6	632	6030.97	5813.76	7410.3	251.2	8.3218	7.977	1550.5	5586.63	0.186462	12664.8	2.44863	3546.12	166.8	8151611	2695	171005	79.7667	133			1465898	0.116656
Heilongjiang	2018	14673.3	606.2	6119.57	6084.65	7506.8	245.64	7.4182	7.7431	4155	5624.29	0.183415	13803.7	2.39777	3968.71	175	8344713	2636	122793	82.8042	131			1349873	0.0909661
Heilongjiang	2019	14770.1	569.2	6177.59	6359.08	7503	223.266	6.4267	7.1831	3540.7	5929.97	0.233786	14982.1	2.39091	4327.78	136.7	8819893	3697	184868	85.6368	131			1465528	0.126144
Heilongjiang	2020	14910.1	538	6171.6	6775.09	7540.8	224.216	6.0749	7.0501	3179	6438.11	0.250998	16168.4	2.41592	5119.58	178.9	9145300	4956	434629	89.7225	131			1731605	0.250998
Heilongjiang	2021	15065	516	6171.6	6912.13	7867.7	238.966	5.709	6.1009	832	6459.97	0.232741	17889.3	2.44102	5760.77	244.4	8689781	4069	5207.4	117.141	130			1945827	0.00267619
Heilongjiang	2022	15209.4	518	6152.89	7090.88	7763.1	238.504	5.5	5.8	97.4	6718.24	0.227017	18577.4	2.47191	6878.82	190.6	9375922	3370	96191.7	86.2738	130			2177941	0.0441663
Heilongjiang	2023	15304.2	472	6238.5	7339.57	7788.2	238.599	5.5	5.6	410.08	6492.5	0.221501	19756	2.45319	8037.81	137	1087.15	1278	76978.8	120.2	129			2.29291e+06	0.0335725
Shanghai	2011	400.63	37.28	199.61	105.68	122	11.97	0.6295	2.0489	24.3	314.578	0.00650875	15737	2.00706	568.51	0.1	1615400	1549	492113	204.281	35			5977131	0.0823327
Shanghai	2012	387.91	45.70	199.02	112.73	136	10.99	0.5817	1.93	14.7	321.726	0.00633246	17452	1.9491	457.82	0.4	2179673	1802	422858	208.979	35			6794636	0.0622341
Shanghai	2013	377.31	46.36	184.09	113.17	114.2	10.7833	0.5019	1.9436	28	323.483	0.00592534	19208	2.0496	511.19	0.4	1872459	1983	677747	874.38	35			7767847	0.0872503
Shanghai	2014	356.982	44.81	184.09	117.76	112.5	10.1538	0.4666	1.9287	12.1	322.221	0.00527247	21191.6	1.93917	634.24	0.1	2023368	2136	632214	885.64	35			8619549	0.0733466
Shanghai	2015	340.211	46.01	188.21	119.01	125.4	9.9173	0.4415	1.803	12.3	302.622	0.00437121	23205.2	1.80761	807.28	0.5	2673700	2338	911298	919.19	35			9361439	0.0973459
Shanghai	2016	294.697	45.45	189.81	122.31	111.8	9.1607	0.3913	1.7062	3.1	285.086	0.00388486	25520.4	1.55259	642.17	0.1	3274100	2756	998008	983.22	35			10493187	0.0951101
Shanghai	2017	284.947	42.44	190.755	121.84	99.8	8.8963	0.3523	1.5664	12.1	292.613	0.00361636	27825	1.49379	684.71	0.5	4565332	3054	1.22318e+06	1013.2	36			12052052	0.101491
Shanghai	2018	282.268	40.83	190.755	93.97	103.7	8.37	0.3177	1.4781	7.3	289.581	0.00319371	30374.7	1.47974	739.79	0.4	4698762	3663	585349	1053.42	36			13592023	0.0430656
Shanghai	2019	261.394	40.8	190.755	98.0381	95.9	7.5328	0.2771	1.3213	8.7	284.843	0.00272256	33195.2	1.37031	866.05	0.2	5231036	4233	2.44668e+06	1102.04	36			15245534	0.160485
Shanghai	2020	255.16	40.81	165.046	102.122	91.4	6.8937	0.2644	1.2864	5	279.823	0.00267619	34911.3	1.54599	823.41	0.3	4738000	5952	3.31754e+06	1087.15	36			16156905	0.205333
Shanghai	2021	264.346	25	165	102.742	94	6.59378	0.2384	1.1712	25	268.93	0.00231402	38520.7	1.6021	1075.15	0.1	4557704	5775	1.31251e+06	11.3186	37			18197705	0.0721252
Shanghai	2022	269.171	21	160.615	100.193	95.6	6.5559	0.2	1.2	4.2	273.531	0.00217232	39729.4	1.67588	1317.96	0.2	3886182	4394	2.26565e+06	6.0924	37			19815785	0.114336
Shanghai	2023	273.196	20	161.6	105.374	101.9	6.43945	0.2	1.2	0.35	269.6	0.00203521	42988	1.69057	1530.24	0.6	399.14	2021	2.92022e+06	12.4	37			2.0496e+07	0.142477
Jiangsu	2011	7663.25	992.59	3817.92	4106.11	3307.8	337.21	8.65	10.644	1032.1	5237.45	0.0624059	10744	2.00718	889.71	70.2	6181300	3753	1.56378e+06	1606.83	809			10655109	0.146763
Jiangsu	2012	7651.56	958.88	3929.72	4214.64	3431.6	330.95	8.3675	11.255	697.5	5808.81	0.0632335	12133	1.9471	1188.94	72.4	7540892	5191	1.01967e+06	1696.41	886			12878616	0.0791753
Jiangsu	2013	7683.63	929.63	3785.27	4405.62	3423	326.83	8.1157	11.6846	487.1	6158.03	0.0610188	13521	2.02988	1572.6	57.6	8683385	6846	1.28824e+06	1801.86	956			14874466	0.0866073
Jiangsu	2014	7678.62	890.37	3890.53	4649.98	3490.6	323.61	7.9531	11.9846	554.1	6443.37	0.0558369	14958.4	1.97367	1619.41	69.9	8993111	7421	2.19627e+06	1834.93	1021			16528208	0.13288
Jiangsu	2015	7745.04	845.69	3952.5	4825.49	3594.7	319.99	7.81	11.3243	615.5	7030.76	0.0568491	16256.7	1.95953	1651.94	69.1	10086000	8086	2.00321e+06	1836.19	1090			18012271	0.111214
Jiangsu	2016	7676.92	814.84	4054.07	4906.55	3542.4	312.52	7.6184	11.3941	301.1	7235.06	0.0526847	17605.6	1.89363	1694.17	70.8	9856200	9857	1.74747e+06	1869.27	1158			20268734	0.0862149
Jiangsu	2017	7556.4	769.9	4131.88	4991.41	3610.8	303.85	7.3167	11.5085	90.7	7161.21	0.0471081	19158	1.8288	1755.68	75.8	9182185	11230	3.24536e+06	1887.99	1213			22600621	0.143596
Jiangsu	2018	7520.23	737.92	4179.83	5017.71	3660.3	292.45	6.96	11.6064	380	7192.46	0.0447292	20845.1	1.79917	1888.84	73.4	9966743	13550	80497.1	1933.14	1256			25044293	0.00321419
Jiangsu	2019	7442.63	706.06	4205.44	5111.95	3706.2	286.21	6.7396	11.4153	224.2	7503.15	0.0431217	22675.4	1.76976	3512.96	68.5	10323708	17328	365031	1949.11	1298			27795165	0.0131329
Jiangsu	2020	7478.4	675.23	4224.73	5213.83	3729.1	280.75	6.5703	11.1776	136	7952.59	0.0441663	24198.5	1.77015	4462.06	59.3	10912500	21626	3.01277e+06	2010.96	1313			30059283	0.100228
Jiangsu	2021	7514.45	630	4224.7	5148.24	3746.1	275.555	6.3547	10.5775	88	8279.72	0.0405829	26790.8	1.77869	5315.79	58.6	11062019	17690	1.66553e+06	520.221	1315			34385572	0.0484369
Jiangsu	2022	7534.24	626	3851.74	5264.08	3769.1	270.137	6.1	10.2	79	8733.8	0.0403611	28486.5	1.95606	6428.04	52.7	11083588	14529	4.1517e+06	542.015	1302			38354282	0.108246
Jiangsu	2023	7589.96	620	3856.7	5360.21	3797.7	267.037	6	10	29.64	8935.5	0.039586	30488	1.96799	7431.41	64.4	1187.82	5521	3.6827e+06	610.5	1291			4.21229e+07	0.0874275
Zhejiang	2011	2462.71	535.77	1456.8	2461.25	781.6	92.07	6.3854	5.8416	431.1	2534.9	0.0489819	14197	1.69049	294.84	38.1	3733200	3604	656549	847.999	110			5980824	0.109776
Zhejiang	2012	2324.16	498.99	1471.02	2489.4	648.2	92.1505	6.2874	6.2287	554.2	2658.66	0.0481138	15806	1.57997	538.67	41.7	4082038	5484	1.6893e+06	869.87	112			7225867	0.233786
Zhejiang	2013	2311.94	460.98	1409.39	2462.2	734	92.4278	6.2198	6.4663	1326.9	2837.39	0.0472665	17494	1.64038	654.99	68.5	5130275	5762	22250.6	904.91	112			8172675	0.00272256
Zhejiang	2014	2274	425.5	1425.37	2420.13	757.4	89.617	5.8748	6.5677	204	2844.59	0.0442381	19373.3	1.59537	771.75	41.5	5245892	6965	391480	905.34	112			9078500	0.0431217
Zhejiang	2015	2290.55	387.66	1432.15	2360.73	584	87.5237	5.6458	6.7458	393.2	2933.44	0.0427386	21125	1.59937	859.37	53.8	7390800	8563	340139	905.56	112			10111792	0.0336379
Zhejiang	2016	2274.44	351.64	1446.31	2136.69	564.8	84.4772	4.9482	6.73	456	3146.06	0.0415899	22866.1	1.57258	861.6	46.8	7224100	9029	888231	926.09	112			11306297	0.0785607
Zhejiang	2017	1981.11	319.22	1444.7	2072.27	580.1	82.6301	4.6303	6.7891	107.3	3093.36	0.0373573	24955.8	1.3713	950.56	15	6966927	10880	775495	976.652	113			12663398	0.0612391
Zhejiang	2018	1978.68	278.13	1440.8	2009.33	599.1	77.761	4.3725	6.8731	168.6	3157.25	0.035002	27302.4	1.37333	1038.65	56.7	7244617	12065	1.20149e+06	1008.31	113			14456893	0.0831086
Zhejiang	2019	1999.62	244.41	1405.43	1908.04	592.1	72.5007	3.8572	6.6737	353.8	3355.25	0.0336379	29875.8	1.42278	1237.85	36.1	7442421	11118	1.20215e+06	1026.73	112			16697956	0.0719941
Zhejiang	2020	2014.5	208	1415.7	1813.17	605.7	69.6111	3.6561	6.6892	114	3496.94	0.0335725	31930.5	1.42298	1494.13	175.4	7648900	13221	1.58892e+06	1038.14	112			18598951	0.0854307
Zhejiang	2021	2014.59	206	1415.7	1773.65	620.9	68.2639	3.4563	6.9687	149	3579.21	0.0300493	35247.4	1.42304	1781.19	66.7	7952656	11613	1.7934e+06	424.464	111			21576904	0.0831165
Zhejiang	2022	2027.16	203	1226.14	1767.56	621	67.0485	3.3	6.9	105.1	3752.31	0.0299143	37565	1.65328	2093.77	175.4	8311998	10266	2.2172e+06	575.635	111			24167668	0.0917423
Zhejiang	2023	2041.38	197	1240.7	1794.03	638.8	65.8141	3.1	6.7	9.81	3978	0.0282485	40311	1.64535	2454.6	22.5	910.65	4584	1.06697e+06	574.2	109			2.64019e+07	0.0404125
Anhui	2011	9022.94	1598.9	3547.65	5657.08	3135.5	329.671	11.7475	8.6114	1317.2	3459.66	0.131714	6811	2.54336	1383.15	72.2	3518700	1513	342399	117.276	105			2146439	0.15952
Anhui	2012	8969.6	1531.2	3585.09	5902.77	3542.9	333.526	11.6741	9.1171	1152.5	3728.3	0.126582	7826	2.50192	1755.87	77.5	4304717	2554	573450	128.797	106			2817953	0.203499
Anhui	2013	8945.64	1469.7	4305.53	6140.28	3279.6	338.404	11.7774	9.4882	1769.7	4009.24	0.12211	8850	2.07771	1866.21	105.2	4781716	3552	231396	138.39	107			3520833	0.0657221
Anhui	2014	8945.53	1415.3	4331.69	6365.83	3415.8	341.391	11.3974	9.6155	641.3	4223.73	0.11475	9916.42	2.06514	1874.99	125	5026868	3636	405906	147.53	109			3936070	0.103125
Anhui	2015	8950.46	1396.2	4400.34	6580.99	4077.2	338.694	11.1048	9.7943	966.7	4390.8	0.111639	10820.7	2.03404	1951.94	140.9	5777400	3845	587163	156.75	112			4317511	0.135996
Anhui	2016	8893.61	1383.5	4437.46	6867.49	3961.8	327.008	10.5704	9.6966	1341.2	4655.53	0.105202	11720.5	2.00421	2196.46	120.3	6248300	3961	621464	161.62	113			4751329	0.130798
Anhui	2017	8726.68	1363.3	4504.14	6312.86	4019.7	318.724	9.9394	9.7601	399.8	4597.94	0.0955759	12758.2	1.93748	2421.22	119.1	6819092	5121	459803	171.314	113			5649198	0.0813926
Anhui	2018	8771.11	1353.6	4538.29	6543.81	4007.3	311.8	9.4177	9.7828	863.2	4672.71	0.0879137	13996	1.93269	2632.95	98.7	7048560	6264	500916	180.79	113			6489541	0.0771883
Anhui	2019	8781.96	1346.9	4580.84	6650.47	4054	298.022	8.8271	10.3735	958	5162.13	0.0785607	15416	1.91711	2707.4	78.2	7362734	6742	908539	189.145	114			7540286	0.120491
Anhui	2020	8817.99	815	4608.83	6799.5	4019.2	289.897	8.3294	10.3299	1238	5680.91	0.0823327	16620.2	1.91328	3334	47.8	9242900	8325	898980	205.307	114			8831833	0.101789
Anhui	2021	8886.77	779	4608.8	6924.31	4087.6	284.727	7.5993	10.2605	296	6004.31	0.0782278	18371.7	1.92822	4362	111.4	9425474	7963	751356	280.415	114			10061245	0.0746783
Anhui	2022	8933.59	790	4576.18	7070.12	4100.1	280.192	7.3	10.2	390.4	6277.98	0.0780042	19574.9	1.9522	6145.7	90	9918819	8359	1.51024e+06	305.922	114			11525148	0.131039
Anhui	2023	9043.96	768	4679.1	7194.56	4150.8	277.993	7.1	10.1	28.75	6247.9	0.0743157	21144	1.93284	7067.3	102.9	1049.29	3532	49509.3	341.7	111			1.26474e+07	0.00391458
Fujian	2011	2285.8	574	967.477	1250.81	672.8	120.932	5.8276	5.7814	133.1	2730.94	0.0918123	8952	2.36264	242.67	23	2078900	1369	20339.5	270.579	642			2215151	0.00918199
Fujian	2012	2263.12	551	968.51	1286.8	547.3	120.866	5.7846	5.8692	159.3	3007.4	0.0901802	10164	2.3367	307.53	25.1	2441622	1721	251195	312.855	678			2709891	0.0926958
Fujian	2013	2292.21	511	1122.42	1336.76	664.4	120.573	5.7804	5.9154	276.8	3281.96	0.0885434	11405	2.04221	358.68	29	3122226	2440	138306	346.68	698			3140589	0.0440382
Fujian	2014	2305.24	493	1116.12	1368.35	667	122.614	5.6391	6.0932	102.6	3522.31	0.0837554	12650.2	2.0654	416.5	30.6	3203234	2567	360145	367.67	714			3550325	0.10144
Fujian	2015	2331.32	480	1061.65	1384.13	500	123.802	5.577	6.2067	203.3	3717.87	0.0815287	13792.7	2.19593	443.95	21.8	4418600	4350	315597	381.06	722			3929298	0.0803189
Fujian	2016	2327.31	450	1055.37	1269.09	477.3	123.842	5.5387	6.2424	386.7	4155.68	0.0820261	14999.2	2.20521	442.09	73.9	4105800	6496	349806	384.45	742			4542920	0.0770003
Fujian	2017	1549.34	418	1064.84	1232.42	487.2	116.323	5.2167	6.2415	57.5	3947.16	0.0688311	16334.8	1.455	494.16	32.9	4477013	6538	996104	388.38	754			5430888	0.183415
Fujian	2018	1577.31	400	1085.18	1228.27	498.6	110.738	4.9143	6.0002	78.7	4229.52	0.0664679	17821.2	1.4535	560.2	23.3	4315149	7489	20529	403.868	758			6427935	0.00319371
Fujian	2019	1599.29	369	1076.78	1237.73	493.9	106.263	4.5477	5.8507	123.1	4636.56	0.0612391	19568.4	1.48526	608.23	26.5	4420628	7597	337145	417.924	759			7537466	0.0447292
Fujian	2020	1631.27	323	1110.42	1260.2	502.3	100.806	4.3163	5.1824	65	4901.07	0.0622341	20880.3	1.46906	717.26	20.9	4500500	8976	294859	445.073	761			8424072	0.035002
Fujian	2021	1651.87	301	1110.4	1270.52	506.4	96.6342	4.1689	4.6304	47	5200.97	0.0593665	23228.9	1.48764	859.41	32.2	3666140	6746	851645	311.733	759			9687292	0.0879137
Fujian	2022	1682.14	299	855.469	1296.71	508.7	92.0693	4	4.7	105.9	5502.56	0.0579214	24986.6	1.96634	989.55	35	4103670	5772	719272	277.446	757			10821348	0.0664679
Fujian	2023	1712.25	289	858.8	1323.69	511	89.1522	3.8	4.3	83.44	5729.2	0.0591978	26722	1.99377	1137.69	26	415.14	2607	1.00052e+06	341.2	756			1.17168e+07	0.0853923
Jiangxi	2011	5486.79	806.1	1867.67	4200.03	2052.8	140.77	9.9537	4.771	1075.3	2207.27	0.118866	7133	2.93777	490.92	53	2879900	269	62636.2	77.26	677			967529	0.0647383
Jiangxi	2012	5524.91	758.8	1907.06	4599.68	2140.6	141.26	10.0413	5.0275	673.5	2399.26	0.117402	8103	2.89708	622.78	58.1	3847674	353	101447	84.616	742			1136552	0.0892582
Jiangxi	2013	5552.56	722.8	1995.6	2014.13	2116.1	141.577	9.9922	5.1401	1049.1	2578.35	0.113565	9089	2.7824	661.93	40.7	4385353	456	122103	90.9	796			1354972	0.0901148
Jiangxi	2014	5570.55	680.9	2001.57	2118.39	2143.5	142.871	9.4764	5.3122	487.1	2726.54	0.107143	10116.6	2.78309	738.48	43.4	5001512	739	129615	97.62	839			1531114	0.0846541
Jiangxi	2015	5579.09	645.3	2027.67	2260.82	2235.6	143.583	9.3873	5.3977	455.3	2859.1	0.106016	11139.1	2.75148	772.74	46.2	5573000	1300	68210.5	99.92	867			1731820	0.0393866
Jiangxi	2016	5560.67	608.7	2036.83	2201.62	2234.4	141.974	9.2188	5.2757	786.1	3130.29	0.102953	12137.7	2.73006	811.05	46.8	5809000	2020	307551	104.58	874			2073091	0.148354
Jiangxi	2017	5638.46	572.3	2039.42	2309.6	2221.7	134.971	8.7737	5.3509	441.4	3069.01	0.0917341	13241.8	2.76474	1030.38	55.6	6077087	3087	529446	108.502	876			2558030	0.206974
Jiangxi	2018	5555.81	527.9	2032.02	2381.97	2190.7	123.197	7.7183	5.2218	530.7	3148.57	0.0853923	14459.9	2.73414	1427.87	63.4	5994078	3653	210289	112.472	878			3106906	0.0676844
Jiangxi	2019	5521.18	489.8	2036.14	2470.66	2157.5	115.571	6.2701	5.202	1200.7	3481.29	0.0831086	15796.3	2.71159	1623.44	67.4	6198025	3727	418212	119.236	876			3843094	0.108822
Jiangxi	2020	5644.37	455	2038.49	2591.05	2163.9	108.812	5.2708	5.2296	943	3820.74	0.0872503	16980.8	2.7689	2063.29	41.3	7403100	4696	628209	130.187	875			4307188	0.145851
Jiangxi	2021	5672.94	424	2038.5	2695.35	2192.3	108.587	5.1629	5.2196	421	3998.09	0.0788091	18684.2	2.7829	2734.19	48	7622555	4037	701778	167.158	871			5021718	0.139749
Jiangxi	2022	5730.55	403	2166.49	2838.16	2151.9	107.705	5.1	5.4	1111.9	4223.81	0.076431	19936	2.64509	3580.74	52.1	7884845	2660	491999	186.495	869			5581520	0.0881479
Jiangxi	2023	5797.01	391	2186.8	2953.53	2198.3	107.124	5	5.4	201.77	4198.9	0.0760991	21358	2.65091	5231.88	52.9	802.43	1062	452442	200.4	865			6.0414e+06	0.0748902
Shandong	2011	10865.4	2164.9	4986.88	12098.2	4426.3	473.64	16.4812	31.8317	2117.2	7409.75	0.0876033	8395	2.17881	319.14	198.4	5640000	3577	943377	456.518	166			8443667	0.111726
Shandong	2012	10867	2068.1	5058.11	12419.9	4815.8	476.258	16.1955	31.8055	1822.6	7945.76	0.0856113	9506	2.14843	857.54	220.8	6738161	4418	954721	465.786	168			10203266	0.0935701
Shandong	2013	10976.4	1973.9	4729.03	12739.8	4528.2	472.657	15.8384	31.8727	1461.7	8749.99	0.08587	10687	2.32107	1001.95	233.5	7481384	5483	888077	471.38	169			11758027	0.0755294
Shandong	2014	11037.9	1878.6	4901.95	13101.4	4596.6	468.08	15.635	30.5168	886.1	9198.26	0.0807443	11882.3	2.25174	962.75	272.7	7728411	6054	1.80883e+06	480.04	172			13040695	0.138706
Shandong	2015	11026.5	1795.4	4964.43	13353	5153.1	463.497	15.1004	30.1575	1379	9549.63	0.0790301	12930.4	2.22111	1773.93	295.2	9644200	7187	61346.6	482.3	174			14271890	0.00429842
Shandong	2016	10973.2	1706.9	5161.16	9797.61	5332.3	456.463	14.864	29.7961	552.2	9325.89	0.0724611	13954.1	2.12611	1992.26	308.6	9434400	8345	142651	488.84	177			15660904	0.00910875
Shandong	2017	11107.8	1622.5	5191.06	10144	5374.3	439.959	14.067	28.7098	856.9	9140.36	0.066535	15117.5	2.13979	2359.73	315.4	9535911	10066	1.61301e+06	488.453	177			17530070	0.0920141
Shandong	2018	11076.8	1534.5	5235.99	10415.2	5319.5	420.349	12.9882	27.6935	983.8	9397.39	0.0647383	16297	2.11551	2821.49	306.9	9984950	10940	761067	416.236	178			16433300	0.0463125
Shandong	2019	10933.1	1445.9	5271.37	10679.8	5357	395.344	12.0342	26.7113	1340.7	9671.67	0.0719941	17775.5	2.07405	3602.81	291.5	10759789	13330	1.532e+06	435.916	178			14947162	0.102494
Shandong	2020	10889.1	1372	5293.56	10964.7	5446.8	380.88	11.4311	26.5659	382	10190.6	0.0733466	18753.2	2.05704	4461.59	286.9	10652900	19280	1.36674e+06	445.623	179			16818915	0.0812619
Shandong	2021	10948.6	1316	5293.6	11186.1	5500.7	371.029	10.823	25.9678	109	11468	0.0725547	20793.9	2.06827	5642.72	173.8	10269455	19508	1.42534e+06	507.755	179			19446588	0.073295
Shandong	2022	10964.1	1284	5209.09	11530.5	5543.8	362.085	10.5	25.4	45.5	12130.7	0.0720374	22109.9	2.10481	6952.5	120.2	11188638	18924	4.06564e+06	463.2	178			21804089	0.186462
Shandong	2023	11002.7	1267	5241.7	11988.7	5655.3	354.794	10.2	25.2	17.38	12531.9	0.0706668	23776	2.09907	7972.12	65.8	1051.73	8040	86287.1	607.9	178			23860197	0.00361636
Henan	2011	14258.6	2210	5150.44	10515.8	5542.5	673.71	12.8747	15.1616	1477.6	6218.64	0.130416	6989	2.76843	428.12	79.9	4804800	1232	124597	281.823	752			2644923	0.0471081
Henan	2012	14262.2	2136	5205.63	10872.7	5898.4	684.43	12.8289	15.5169	1388.8	6679.04	0.127352	7963	2.73976	1178.74	79.2	5517307	1402	116099	290.028	789			3107802	0.0373573
Henan	2013	14323.5	2044	4969.11	11150	5713.7	696.37	13.0058	16.7794	1179.9	7198.08	0.126089	8969	2.88252	1546.61	88.8	6298543	1971	339605	305.42	848			3553246	0.0955759
Henan	2014	14378.3	1897	5101.15	11476.8	5772.3	705.75	12.9866	16.3477	1905.2	7549.11	0.119068	9966.07	2.81864	1139.15	78.4	6619375	2572	275331	313.23	897			4000099	0.0688311
Henan	2015	14425	1719	5210.64	11710.1	6470.2	716.09	12.8748	16.2001	225.1	7641.27	0.113765	10852.9	2.76836	1740.67	72.5	7916300	3317	399083	321.01	941			4350430	0.0917341
Henan	2016	14472.3	1546	5242.92	9854.95	6498	715	12.7107	16.3149	519.3	7799.67	0.105906	11696.7	2.76035	2791.33	90.7	8070600	4223	328808	317.23	971			4941880	0.066535
Henan	2017	14732.5	1375	5273.63	10038.3	6524.2	706.7	12.0713	15.7298	1247	7562.53	0.0929075	12719.2	2.79362	3441.36	101.8	9168095	5578	540771	328.817	994			5820538	0.0929075
Henan	2018	14783.4	1303	5288.69	10204.5	6648.9	692.793	11.3603	15.2838	1167.7	7757.94	0.0892582	13830.7	2.79528	4567.25	113.9	10010834	6841	667952	330.59	997			6715193	0.0994687
Henan	2019	14714	1251	5328.95	10357	6695.4	666.721	10.7231	15.0762	969.8	8541.77	0.0854307	15163.7	2.76114	4822.64	83.4	10597034	6857	701367	353.825	1001			7930369	0.0884407
Henan	2020	14688	1223	5463.07	10463.7	6825.8	647.983	10.24	15.1717	670	9956.35	0.0973459	16107.9	2.6886	5587.18	114.3	11454000	8769	362844	373.174	1000			9012742	0.040259
Henan	2021	14705.1	1172	5463.1	10650.2	6544.2	624.66	9.7432	14.0352	1588	10501.2	0.09545	17533.3	2.69172	6336.38	106.2	10152155	7395	1.58316e+06	451.431	999			10188408	0.155388
Henan	2022	14711.5	1320	5623.22	10858.7	6789.4	595.31	9.2	14	683.4	10952.2	0.0948372	18697.3	2.61621	7902.91	82.2	11104837	6626	2.4667e+06	505.527	997			11432586	0.215761
Henan	2023	14747.1	1224	5666.7	11118.4	6624.3	583.964	9	13.9	1987.57	10304.6	0.0906457	20053	2.60242	9867.4	84.7	1059.78	2837	795992	568.8	995			12116649	0.0656941
Hubei	2011	8009.57	1547.86	2455.69	3571.23	2388.5	354.89	13.9524	6.5044	2580	4252.9	0.130871	7540	3.26164	535.59	8.1	3762300	1054	372306	112.26	102			3230129	0.11526
Hubei	2012	8078.89	1510.44	2548.91	3842.16	2485.1	354.89	13.9524	6.5044	1718.7	4732.12	0.128032	8582	3.16955	647.09	90.3	4190224	1351	577111	112.26	108			3845239	0.150085
Hubei	2013	8106.19	1458.59	2791.41	4081.05	2501.3	351.934	12.7152	6.631	2487.9	5160.56	0.124967	9692	2.90398	689.04	83.8	4653424	1676	637133	130.14	114			4462043	0.14279
Hubei	2014	8112.26	1374.29	2855.32	4292.9	2584.2	348.27	12.6099	6.9186	1058.8	5452.84	0.116033	10849.1	2.8411	667.46	76.2	4837970	2044	478270	142.23	116			5108973	0.0936136
Hubei	2015	7952.36	1304.21	2899.15	4468.12	2914.8	333.872	12.0685	7.1321	1115.6	5728.56	0.112007	11843.9	2.743	646.32	103.9	6165700	2433	446711	149.1	120			5617415	0.0795226
Hubei	2016	7843.51	1246.66	2905.57	4187.75	2796.4	327.96	11.7401	6.7306	2741.2	6278.35	0.112025	12725	2.69947	558.89	71.3	7045900	2981	691546	152.86	119			6000423	0.11525
Hubei	2017	7956.14	1196.22	2919.17	4335.09	2846.1	317.93	10.9588	6.5876	1437.1	6129.72	0.0994687	13812.1	2.72548	923.14	47.5	7147326	4055	636369	156.569	120			7006253	0.0908287
Hubei	2018	7952.9	1147.05	2931.9	4424.61	2839.5	295.819	10.3317	6.3554	1076.1	6207.83	0.0901148	14977.8	2.71254	1188.64	65.7	7855536	4242	598283	165.214	121			8220501	0.0727793
Hubei	2019	7815.89	1107.24	2968.99	4515.73	2725	273.89	9.7024	5.8801	1429.8	6681.85	0.0831165	16390.9	2.63251	1648.08	137.7	8282095	5638	1.366e+06	178.553	122			9578823	0.142607
Hubei	2020	7974.39	897	3086.04	4626.07	2727.4	267.324	9.3143	5.8039	1632	7303.64	0.0951101	16305.9	2.58402	2204.39	109.9	8689000	6927	50829.7	186.874	122			10052800	0.00505627
Hubei	2021	8109.24	881	3086	4731.46	2764.3	262.623	9.0468	5.7268	506	8296.44	0.0932099	18259	2.62775	3005.73	56.1	8416517	6941	142856	203.56	120			11602178	0.0123128
Hubei	2022	8191.92	928	3208.84	4878.65	2741.1	257.98	8.5	5.7	1174.6	8939.33	0.0928019	19709.5	2.55293	3963.94	134	9248363	7769	1.36647e+06	232.388	119			12546696	0.108911
Hubei	2023	8309.25	874	3220.2	4975.49	2777	254.385	8.3	5.5	359.2	9106.9	0.0909153	21293	2.58035	4943.08	49.4	953.45	3445	846794	277.2	118			1.40817e+07	0.0601345
Hunan	2011	8401.97	1679.94	2762.41	4935.59	2939.4	242.489	12.0431	7.3729	2374.8	4508.2	0.140727	7082	3.04154	1358.67	66.2	3942600	938	210650	106.03	693			2332181	0.0903233
Hunan	2012	8511.87	1668.99	2715.78	5189.24	3061.9	249.11	12.298	7.9536	1233.9	4904.1	0.135604	8024	3.13423	1593.76	70.9	4477359	1221	281002	110.229	803			2876780	0.0976792
Hunan	2013	8650.02	1656.01	3084.3	5433.99	2925.7	248.193	12.4298	8.2407	3047.2	5043.58	0.125874	9029	2.80453	1746.68	75.2	5165537	1553	331637	118.58	916			3270253	0.10141
Hunan	2014	8764.47	1651.37	3101.7	5672.1	3001.3	247.8	12.4277	8.2946	1136.1	5304.82	0.116459	10060.2	2.8257	2016.12	80.7	5575869	1847	638599	123.83	1055			3679345	0.173563
Hunan	2015	8716.99	1618.71	3113.32	5894.06	3094.2	246.536	12.2353	8.3989	765.1	5630.75	0.115272	10992.5	2.7999	2369.49	100	6762400	2101	16031.6	123.91	1184			4126692	0.00388486
Hunan	2016	8793.28	1587.32	3132.37	6097.54	3052.3	246.443	11.8661	8.4679	1375.5	6081.92	0.113414	11930.4	2.80723	2641.56	98.2	7297500	2241	247008	126.7	1316			4688418	0.0526847
Hunan	2017	8321.98	1515.16	3145.87	6254.83	3073.6	245.258	11.6023	8.5209	1217.7	5213.48	0.0884407	12935.8	2.64537	3141.86	83.3	7824215	3017	236452	128.557	1406			5685310	0.0415899
Hunan	2018	8111.09	1462.38	3164	6338.57	3022.9	242.614	11.4155	8.5397	625.6	5361.62	0.0846541	14092.5	2.56355	3465	89.6	9255717	3886	692513	130.821	1468			6582729	0.105202
Hunan	2019	8122.8	1409.24	3176.11	6471.82	2974.8	229.008	10.5548	8.3792	997.8	6405.06	0.0917423	15394.8	2.55747	4018.53	73.1	9786759	4289	645680	132.978	1498			7871638	0.0820261
Hunan	2020	8400.13	836	3192.9	6588.95	3015.1	223.733	10.145	8.3005	817	7511.96	0.101491	16584.6	2.63087	4499.45	78.3	9877100	5837	925240	134.686	1508			8987001	0.102953
Hunan	2021	8504.26	801	3192.9	6676.4	3074.4	219.063	9.1114	7.9094	436	7662.36	0.0938474	18295.2	2.66349	5291.84	95.9	9490110	4900	745559	331.228	1510			10289088	0.0724611
Hunan	2022	8591.54	785	2876	6755.95	3018	215.874	8.2	7.4	1129.7	8160.13	0.0945688	19546.3	2.98732	6021.96	101.4	9954435	4316	1.24466e+06	332.519	1512			11752512	0.105906
Hunan	2023	8714.95	773	2917.6	6839.51	3068	213.338	7.5	6.6	276.01	8199.4	0.0924022	20921	2.98703	7589.77	91.2	1068.21	1605	1.43833e+06	317.3	1509			1.28394e+07	0.112025
Guangdong	2011	4572.03	1402.33	1873.16	2414.82	1361	241.3	11.4082	4.4035	501.7	4384.44	0.0500881	8889	2.44081	191.55	88.5	4203400	3022	1.18573e+06	1134.92	114			10454872	0.113414
Guangdong	2012	4629.6	1376.77	1874.44	2496.68	1295.7	245.376	11.3878	4.443	417.2	4656.85	0.0498925	9999	2.46986	441.1	116	5395580	3450	564814	1187.5	115			12361501	0.0456914
Guangdong	2013	4698.08	864	1770.76	2564.89	1315.9	243.906	11.009	4.5781	1134.5	4946.81	0.0487798	11068	2.65315	657.39	105.6	5952799	4427	2.20391e+06	1234.84	117			14434527	0.152683
Guangdong	2014	4744.95	933	1770.99	2632.37	1357.3	249.583	11.2664	4.6206	842.4	5234.21	0.0467015	12245.6	2.67926	847.65	26.6	5575889	5105	3.75635e+06	1314	118			16054458	0.233976
Guangdong	2015	4784.72	987	1771.26	2696.79	1211.7	256.457	11.3782	4.6795	846.3	5520.03	0.0459473	13360.4	2.70131	910.45	24.8	8119000	6349	1.32095e+06	1326.2	118			17981679	0.0734609
Guangdong	2016	4830.83	1046	1771.71	2390.5	1204.2	261.016	11.3652	4.5505	630.7	6078.43	0.0456914	14512.2	2.72665	1084.8	21.5	7154400	9286	2.42807e+06	1334.78	119			20351440	0.119307
Guangdong	2017	4227.51	1112	1774.61	2410.77	1208.6	258.304	11.2958	4.5867	282.6	5969.87	0.040259	15779.7	2.38222	1296.78	50.6	7544006	12642	3.67401e+06	1414.77	120			23436283	0.156766
Guangdong	2018	4279.36	1172	1775.21	2429.94	1193.5	231.32	9.3684	4.4814	547.8	6318.12	0.0393866	17167.7	2.41063	1550.08	16	9097841	13624	4.0147e+06	1443.1	120			27046969	0.148434
Guangdong	2019	4357.38	1243	1773.4	2455.79	1240.8	225.789	8.7489	4.3842	144.7	7175.89	0.0404125	18818.4	2.45708	1883.22	25.3	9576808	15943	3.11568e+06	1448.04	119			30984890	0.100555
Guangdong	2020	4451.81	1340	1776.46	2495.43	1267.6	219.798	8.3217	4.2558	84	7901.92	0.0430656	20143.4	2.50601	2676.87	33.8	11258100	21902	3.03841e+06	1467.46	120			34798833	0.0873137
Guangdong	2021	4498.36	753	1776.5	2524.48	1279.9	212.871	7.744	4.3027	76	8305.84	0.0402325	22306	2.53215	4840.52	65.6	11094706	18465	5.46597e+06	690.402	122			40021795	0.136575
Guangdong	2022	4553.47	722	1560.23	2556.3	1291.5	208.743	7.6	4.5	194.4	8892.29	0.0413604	23597.8	2.91846	8200.65	25	10675665	16434	3.79347e+06	564.512	123			44118955	0.0859828
Guangdong	2023	4587.27	688	1560.2	2586.04	1285.2	206.793	7.4	4.4	217.45	9202.1	0.0408386	25142	2.94018	10137.4	14	1076.77	5507	3.66192e+06	764.2	121			4.80262e+07	0.0762484
Guangxi	2011	5996.48	1565	1529.24	3033.15	1429.9	242.71	6.6229	3.7403	1437.9	3323.37	0.174665	6003	3.92121	83.14	82.6	3148600	491	138450	56.1794	213			810205	0.170883
Guangxi	2012	6082.61	1481	1541.29	3195.91	1426.3	249.04	6.7784	3.9699	575	3490.72	0.166655	6894	3.94644	129.62	95.5	3690650	966	5918.83	63.314	223			971539	0.00609222
Guangxi	2013	6137.16	1478	1586.37	3382.98	1521.8	255.701	6.9037	4.1479	694.4	3755.19	0.162186	7793	3.86868	276.4	101	3718964	1622	13596.1	68.38	232			1076790	0.0126265
Guangxi	2014	5929.94	1450	1600	3567.49	1534.4	258.676	7.1999	4.4087	1212.7	3947.73	0.153988	8683.18	3.70621	497.48	110.7	3912868	1706	129130	76.21	240			1119033	0.115394
Guangxi	2015	6134.7	1297	1618.79	3803.18	1433.2	259.857	7.4916	4.6276	545.7	4197.12	0.152677	9466.58	3.78969	634.13	112.8	4975300	1929	64971.9	83.91	249			1059124	0.061345
Guangxi	2016	6145.31	1207	1646.07	3527.26	1419	262.142	8.5694	4.8445	301	4591.37	0.152683	10359.5	3.73332	888.22	116.2	5734800	1562	106805	95.37	252			1177487	0.0907057
Guangxi	2017	5969.88	1110	1669.87	3658.33	1370.5	263.831	7.2495	4.7693	196	4698.71	0.155388	11325.5	3.57505	1253.07	125.7	6468687	1913	118232	103.531	253			1421787	0.083157
Guangxi	2018	5972.38	1024	1706.88	3750.82	1372.8	255.046	6.9714	4.7195	150	4909.24	0.148354	12434.8	3.499	1688.45	128.6	6565799	2174	164420	108.249	255			1448530	0.113508
Guangxi	2019	5989.2	951	1713.08	3840.04	1332	252.035	6.8144	4.7577	247.8	5498.81	0.15952	13675.7	3.49615	1923.54	156.1	7472063	2663	291801	126.469	255			1671326	0.174593
Guangxi	2020	6107.32	866	1731.03	3901.4	1370	247.85	6.6026	4.8712	279	5913.28	0.160485	14814.9	3.52814	2516.05	145.3	9043800	3734	7572.27	141.299	255			1732304	0.00437121
Guangxi	2021	6177.52	842	1731	3886.35	1386.5	251.893	6.4233	4.5404	152	6524.39	0.162302	16362.9	3.56876	3665.82	181.6	7578036	3750	113390	236.833	254			1994572	0.0568491
Guangxi	2022	6271.4	857	1549.35	3825.26	1393.1	249.204	6.2	4.6	376	6938.53	0.162344	17432.7	4.04775	4739.84	184.7	7370679	3540	93142.6	211.993	254			2179354	0.0427386
Guangxi	2023	6352.35	829	1695.6	3850.93	1395.4	247.571	6	4.4	219.8	7229.3	0.164258	18656	3.74637	6014.63	143.1	729.94	1210	254700	270.6	254			2.28145e+06	0.111639
Hainan	2011	838.348	227.91	247.51	444.33	188	47.73	4.6854	1.9387	516.6	1002.35	0.261323	6801	3.38713	96.79	12.6	1056300	188	8455.91	7.0733	222			103717	0.0815287
Hainan	2012	854.642	218.15	256.75	479.66	178.1	45.53	3.9637	2.1394	60.5	1082.15	0.249179	7816	3.32869	163.04	10.8	1236240	255	14550	8.5876	237			137244	0.106016
Hainan	2013	848.216	199.41	260.928	502.1	190.9	47.57	4.3478	2.3333	164.7	1144.94	0.238066	8802	3.25077	299.04	5.1	1390310	355	11724.7	9.63	248			148357	0.0790301
Hainan	2014	859.615	195.59	259.924	517.31	186.6	49.46	3.99	2.81	309.4	1252.18	0.231244	9912.57	3.30718	322.08	4.7	1463014	417	19243.5	10.89	269			169151	0.113765
Hainan	2015	845.277	189.95	263.994	511.59	154.5	51.14	3.98	3.2433	41.2	1323.91	0.230833	10857.6	3.20188	360.33	6.9	1642400	497	19006	13.02	290			169685	0.112007
Hainan	2016	823.26	187.45	289.95	516.569	146.1	50.6227	3.4028	2.6704	509.3	1470.41	0.233976	11842.9	2.83932	371.18	16.1	1790400	474	25025	13.89	330			217095	0.115272
Hainan	2017	709.441	183.53	289.25	569.8	138.1	51.3601	3.3408	2.7642	10.8	1488.86	0.215761	12901.8	2.45269	462.31	7.4	1984157	663	10618.4	15.5189	375			231099	0.0459473
Hainan	2018	712.938	177.09	290.482	565.82	147.1	48.37	2.325	2.5539	32.4	1535.73	0.206974	13988.9	2.45433	840.36	13.2	2277110	779	41027.8	17.4095	398			268723	0.152677
Hainan	2019	676.235	175.15	290.627	581.232	145	46.2644	2.1358	3.055	3.6	1689.4	0.203499	15113.1	2.32681	976.67	16	2513993	1232	69041.3	18.684	407			299096	0.230833
Hainan	2020	676.864	170.79	292.207	615.567	145.5	42.6091	1.9747	3.058	40	1821.02	0.205333	16278.8	2.31639	1159.33	12.4	2685700	2030	26801.4	20.9562	416			366252	0.0731775
Hainan	2021	684.777	169	292.2	630.752	146	40.7673	1.8729	3.4246	32	2014.79	0.193724	18076.3	2.34352	1458.21	3.1	2607179	2213	57489.7	62.653	416			469840	0.12236
Hainan	2022	687.183	173	330.172	631.796	146.6	38.6434	1.8	3.5	3.5	2272.04	0.207943	19117.4	2.08129	1709.19	6.5	2656480	1739	106795	46.1344	414			683660	0.15621
Hainan	2023	702.364	168	334.5	633.09	147	37.468	1.7	3.7	1.04	2410.3	0.199624	20708	2.09974	1878.83	7.9	271.84	894	135549	76.2	412			897986	0.150948
Chongqing	2011	3413.09	568.95	692.88	1140.3	1126.9	95.58	2.0324	3.9332	816	1265.33	0.0843561	6605	4.92594	154.33	49.6	1989100	822	122605	70.3706	437			1283560	0.0955191
Chongqing	2012	3477.69	531.18	702.97	1162	1060.5	96.02	1.948	4.0928	405.4	1402.03	0.0823876	7526	4.94714	190.04	56.4	2563490	1060	141660	73.8	474			1597973	0.0886496
Chongqing	2013	3515.89	495.08	675.183	1198.88	1148.1	96.6435	1.8354	4.286	455.3	1513.74	0.0795368	8493	5.20732	264.73	20.4	2819412	1317	247983	76.12	515			1764911	0.140507
Chongqing	2014	3540.35	463.78	677.263	1243.34	1144.5	97.26	1.8437	4.3824	280.9	1594.96	0.0743925	9489.82	5.22744	229.03	21.2	2916154	2109	174482	78.31	566			2018528	0.0864401
Chongqing	2015	3575.8	440.3	687.193	1299.73	1051	97.72	1.8199	4.5162	70.8	1738.15	0.0731775	10504.7	5.20349	304.29	19.7	3313300	4151	201688	78.14	584			2470012	0.0816548
Chongqing	2016	3600.74	419.19	690.6	1318.67	1078.2	96.1606	1.7604	4.5265	190.4	1968.28	0.0734609	11548.8	5.21392	314.15	18.9	3479900	2496	505241	78.69	593			3021830	0.167197
Chongqing	2017	3339.56	402.91	694.26	1352.6	1079.9	95.4649	1.7467	4.5479	125.9	1902.47	0.0656941	12637.9	4.81024	410.77	18	3475669	3354	27177.9	80.1802	592			3646309	0.00745353
Chongqing	2018	3348.49	390.62	696.94	1428.12	1079.3	93.17	1.7191	4.4625	70.9	2052.41	0.0676844	13781.2	4.80456	618	20.6	3667749	3430	52140.4	79.5272	596			4102094	0.0127107
Chongqing	2019	3345.74	381.48	697.68	1464.67	1075.2	91.08	1.6542	4.2559	78.3	2337.81	0.0657221	15133.3	4.79553	620.03	24.5	3895268	3112	550226	80.9037	595			4695714	0.117176
Chongqing	2020	3372.54	378	698.32	1497.99	1081.4	89.8287	1.6205	4.1694	159	2749.05	0.0721252	16361.4	4.82951	696.73	21.4	4167600	4189	325654	82.5063	594			5267944	0.061818
Chongqing	2021	3409.26	366	698.3	1532.45	1092.8	89.0531	1.6038	4.1159	60	2935.65	0.0689037	18099.6	4.88222	915.06	22.4	4062587	3116	553153	85.5708	593			6038410	0.0916057
Chongqing	2022	3479.02	389	669.868	1565.6	1072.8	88.7413	1.6	4.1	369.5	3068.45	0.0690755	19312.7	5.1936	1234.45	20.4	3938467	2575	548269	88.3559	592			6866481	0.0798471
Chongqing	2023	3506.19	361	681.1	1586.37	1095.9	88.44	1.6	4	98.03	3154.3	0.0688222	20820	5.14784	1486.64	19.2	415.66	1182	824402	90.5	590			7.46671e+06	0.11041
Sichuan	2011	9565.55	1972	2600.75	3426.1	3291.6	251.231	6.191	12.2227	1528.2	4932.73	0.141892	6505	3.678	1762.59	156	5457000	1326	510662	148.567	116			2941009	0.173635
Sichuan	2012	9657.01	1905	2662.65	3694.03	3271.3	253.03	6.0317	12.6827	943.9	5433.12	0.138116	7432	3.62684	2317.78	139.1	6549482	1920	18498.9	155.961	118			3508589	0.00527247
Sichuan	2013	9682.19	1854	2616.54	3953.09	3387.1	251.143	5.9954	12.7854	1602.9	5620.27	0.129797	8381	3.70038	2733.93	84.6	7417837	2308	223331	163.51	118			3999702	0.0558369
Sichuan	2014	9668.61	1804	2666.32	4160.12	3374.9	250.188	5.9385	13.0263	919.3	5888.09	0.123737	9347.74	3.6262	2768.19	65.9	8265910	2329	198775	169.57	122			4493285	0.0442381
Sichuan	2015	9689.93	1758.4	2735.09	4404.55	3394.6	249.827	5.8912	13.217	562.7	6377.84	0.12236	10247.4	3.54283	2948.67	98.3	9266500	2992	577049	174.81	124			5028761	0.11475
Sichuan	2016	9728.61	1709	2813.55	4267.33	3469.9	248.984	5.8038	13.2384	410.6	6831.08	0.119307	11203.1	3.45777	3124.93	99.9	9887100	4165	470219	183.08	125			5614193	0.0837554
Sichuan	2017	9575.05	1661.5	2873.1	4420.3	3488.9	241.951	5.5751	13.0993	215.7	6955.55	0.11526	12226.9	3.33265	3547.68	141.1	10231290	5882	683415	188.441	125			6378500	0.107143
Sichuan	2018	9615.32	1618	2932.54	4603.88	3493.7	235.207	5.1276	12.0186	484	7195.65	0.108822	13331.4	3.27883	3770.32	150.6	13108851	5329	595151	198.618	127			7370813	0.0807443
Sichuan	2019	9692.98	1579.5	2954.09	4682.3	3498.5	222.772	4.629	12.3235	323.8	7889.35	0.103125	14670.1	3.2812	2695.68	133.2	12884232	5384	1.03702e+06	205.798	127			8709515	0.119068
Sichuan	2020	9849.89	1542	2992.24	4754	3527.4	210.815	4.213	11.8818	633	9216.4	0.114336	15929.1	3.29181	3351.81	169.6	13393600	7245	1.22448e+06	205.906	127			10552846	0.116033
Sichuan	2021	9999.92	1506	2992.2	4833.88	3582.1	207.159	4.0974	11.6968	266	9383.32	0.105141	17575.3	3.342	4579.75	174.1	13300961	6895	1.41442e+06	273.154	125			12145209	0.116459
Sichuan	2022	10227.4	1602	2975.74	4923.33	3510.5	204.37	4	11.5	615.9	9859.75	0.105098	18672.4	3.43691	5637.36	161.6	13593218	6245	567429	293.651	125			12150136	0.0467015
Sichuan	2023	10264.4	1535	2994.2	5027.19	3593.8	202.159	4	11.2	227.95	9977.8	0.10072	19978	3.4281	6503.85	174.1	1455.2	2920	2.09086e+06	328.3	125			1.3578e+07	0.153988
Guizhou	2011	5021.22	1194.39	1201.19	1851.4	876.9	94.0838	1.4469	4.0857	2570.2	1165.46	0.127366	4499	4.1802	21.19	34	2784700	277	83962.1	47.9919	238			363089	0.231244
Guizhou	2012	5182.86	1189.04	1214.57	2106.65	1161.7	98.1726	1.445	4.4062	542.1	1436.61	0.130164	5159	4.26724	68.76	35	3618731	412	31041.1	54.4597	284			417261	0.0743925
Guizhou	2013	5390.11	1179.76	926.904	2240.8	1030	97.4153	1.348	4.7495	1522.4	1663.02	0.12725	5898	5.81518	161.93	40.3	4003100	755	58385.5	61.89	332			471850	0.123737
Guizhou	2014	5516.46	1171.02	981.834	2458.4	1138.5	101.295	1.3425	4.8949	626.7	2118.48	0.138182	6671.22	5.61852	439.8	36.5	4471856	1139	76662.8	71.27	383			554795	0.138182
Guizhou	2015	5542.17	1161.54	1065.43	2575.15	1210.6	103.688	1.3722	4.9403	224.4	2738.67	0.15621	7386.87	5.2018	518.94	28.5	5342600	1420	96780.6	80.12	438			623196	0.155297
Guizhou	2016	5596.81	1136.87	1088.07	2041.06	1264.3	103.671	1.3677	5.1053	330.7	3097.19	0.156766	8090.28	5.14379	646.17	45.4	6293800	1880	73047.3	85.25	500			734006	0.0995186
Guizhou	2017	5659.37	828.02	1114.12	2181.43	1242.4	95.6546	1.3399	5.1138	267.3	3413.86	0.150085	8869.1	5.07968	829.67	31.7	6120492	2157	84821.5	95.1058	570			958815	0.088465
Guizhou	2018	5477.16	764.96	1132.24	2376.65	1059.7	89.4783	1.1122	5.5031	291.7	3619.52	0.145851	9716.1	4.83744	1189.82	30.2	6648442	2289	160229	98.4075	635			1216145	0.131751
Guizhou	2019	5481.56	700.45	1153.99	2484.6	1051.2	83.184	0.921	4.4121	141	3888.99	0.135996	10756.3	4.7501	1363.53	28.8	9989007	2163	135638	104.935	668			1446849	0.0937473
Guizhou	2020	5475.35	634	1165.49	2582.36	1057.6	78.7795	0.8423	4.5411	233	4358.62	0.142477	11642.3	4.69789	1669.78	52.4	10243100	2545	127500	117.133	694			1617090	0.0788452
Guizhou	2021	5422.88	618	1165.5	2705.41	1094.9	75.9783	0.7048	4.4224	144	4691.97	0.139428	12856.1	4.65283	1829.34	62.5	7307379	1959	299228	167.953	731			1803506	0.165914
Guizhou	2022	5359.45	693	1185.17	2805.71	1114.6	75.4073	0.7	3.9	420.4	4908.67	0.141892	13706.7	4.52209	2048.76	44.1	6921467	1601	16291.8	164.226	747			1993394	0.0081729
Guizhou	2023	5344.29	649	1229.9	2868.99	1119.7	74.7358	0.7	3.8	242.74	4953.6	0.138395	14817	4.3453	2476.69	35.1	775.88	645	27582.1	186.5	743			2.11378e+06	0.0130487
Yunnan	2011	6667.47	1689.34	1634.24	2628.39	1673.6	200.47	4.8157	9.1229	1989.3	2306.49	0.158663	5170	4.07986	605.48	58	4098000	592	69016.2	66.7808	125			560797	0.123068
Yunnan	2012	6920.41	1610	1677.9	2874.45	1687.3	210.209	5.5326	10.128	1578.3	2680.22	0.160488	5930	4.12445	712.87	62.6	5186048	826	42007.2	73.7805	134			687548	0.0610971
Yunnan	2013	7148.16	1559.25	1660.27	3070.33	1824	219.015	5.4782	10.6606	1231.1	3056.04	0.160183	6724	4.30542	1030.53	87.4	5389746	1187	75483.8	82.37	148			798371	0.0945473
Yunnan	2014	7194.43	1515.27	1708.97	3215.03	1860.7	226.86	5.7225	11.0993	882	3263.35	0.155297	7456.13	4.20981	1106.38	72.2	5944511	1532	73308.8	87.12	170			859297	0.0853126
Yunnan	2015	7185.63	1478.41	1757.71	3333.04	1791.3	231.869	5.8648	11.3104	1028.3	3383.09	0.150948	8242.08	4.08806	1195.08	72.3	6415200	2161	126515	91.45	183			1093570	0.11569
Yunnan	2016	7164.46	1474.04	1809.39	3440.64	1815.1	235.583	5.8601	11.5926	868.5	3633.12	0.148434	9019.81	3.9596	1172.5	76.9	7129200	3106	231155	95.26	199			1327616	0.174113
Yunnan	2017	6790.8	1380.11	1851.42	3534.53	1843.4	231.94	5.7675	12.015	406.6	3872.93	0.14279	9862.17	3.66789	1174.05	59	6748159	4371	9347.84	102.336	213			1577604	0.00592534
Yunnan	2018	6890.77	1295.3	1898.07	2693.51	1860.5	217.372	5.2591	11.9685	274.8	4108.88	0.139749	10767.9	3.6304	1188.01	97.4	8422000	4201	114287	104.941	218			1872976	0.0610188
Yunnan	2019	6938.85	1260.51	1922.49	2714.4	1870	204.027	4.7441	12.2139	1568.9	4935.73	0.130798	11902.4	3.6093	1645.99	74.7	11171996	3792	104008	120.418	218			2200452	0.0472665
Yunnan	2020	6989.67	1226	1978.07	2786.75	1895.9	196.652	4.4846	12.1558	1225	5920.52	0.146763	12841.9	3.53358	1767.24	166.9	11001300	5138	300373	123.989	218			2459862	0.12211
Yunnan	2021	7057.24	1187	1978.1	2838.89	1930.3	187.328	4.1104	11.7326	519	6351.82	0.142566	14197.3	3.56769	1932.46	226.1	9197358	4822	249638	173.754	218			2819392	0.0885434
Yunnan	2022	7130.63	1225	2035.26	2913.65	1958	183.384	4.1	11.3	810.6	6635.8	0.138571	15146.9	3.50354	1989.56	179	8884251	4829	356056	165.743	218			3135272	0.113565
Yunnan	2023	7218.08	1184	2036	3013.99	1974	179.336	3.9	11.2	672.46	6834.5	0.140121	16361	3.54523	2194.39	188.4	903.93	2367	297743	204.8	218			3.46737e+06	0.08587
Shaanxi	2011	4181.04	822.17	1274.34	2182.85	1194.7	207.27	1.241	3.7912	762.5	2058.6	0.097576	5484	3.28093	159.5	48.8	3337900	645	243931	131.325	519			2493548	0.0978248
Shaanxi	2012	4238.31	835	1277.18	2350.17	1255.9	239.805	1.2952	3.9077	508.9	2303.2	0.0947966	6285	3.31849	309.38	48.9	3764492	1009	248454	142.487	572			2872035	0.0865078
Shaanxi	2013	4269.02	809	1209.94	2452.72	1215.8	241.734	1.2998	4.0847	813.4	2562.51	0.0941689	7092	3.52828	539.47	42	4196218	1095	595996	113.01	628			3427454	0.173889
Shaanxi	2014	4262.14	791	1226.49	2552.13	1197.8	230.189	1.2793	4.1479	772.2	2741.82	0.088465	7932.21	3.47507	567.66	63.2	4459710	1214	30811.6	109.02	685			3667730	0.00840073
Shaanxi	2015	4284.48	795	1236.77	2667.27	1204.7	231.946	1.3092	4.3068	744.3	2813.5	0.0886496	8688.91	3.46425	540.45	34	5205800	1142	52325.9	110.24	731			3931727	0.0133086
Shaanxi	2016	4276.92	803	1251.39	2171.9	1264	233.054	1.319	4.3717	632.9	2985.76	0.0873137	9396.45	3.41774	648.24	29.2	5433000	1519	503097	118.68	758			4195554	0.119912
Shaanxi	2017	4063.88	805	1263.09	2242.51	1194.2	232.149	1.3335	4.3954	651.1	3077.62	0.0795226	10264.5	3.21741	748.41	54.2	5454020	1852	265736	130.846	767			4609363	0.0576513
Shaanxi	2018	4091.01	804	1274.99	2311.79	1226	229.643	1.255	4.4147	382.4	3239.99	0.0748902	11212.8	3.20866	1113.05	79.9	6267851	1891	485658	133.605	771			5324201	0.0912171
Shaanxi	2019	4132.09	803	1285.16	2331.49	1231.1	202.519	1.224	4.478	645.1	3536.8	0.0771883	12325.7	3.21524	1418.97	164.5	6841766	2524	507211	137.822	770			5845754	0.0867658
Shaanxi	2020	4160.85	632	1336.81	2387.96	1274.8	201.906	1.1951	4.4724	532	4056.61	0.0866073	13316.5	3.11253	1796.9	165.3	7422500	3578	747888	126.762	770			6323310	0.118275
Shaanxi	2021	4189.27	611	1336.8	2431.21	1270.4	200.701	1.1643	4.4294	973	4313.44	0.0808497	14744.8	3.1338	2193.34	149.1	6942569	3389	1.08159e+06	154.29	769			7006207	0.154377
Shaanxi	2022	4212.23	649	1161.63	2473.88	1297.9	194.162	1.1	4.6	553.3	4601.93	0.0785806	15704.3	3.62614	2576.47	145	7332112	3631	48731.5	156.922	768			7695512	0.00633246
Shaanxi	2023	4239.94	619	1181.2	2520.78	1323.7	193.673	1.1	5	517.8	4724.9	0.0784287	16992	3.58952	3033.26	155.6	754.49	1519	534984	182.1	768			8.46045e+06	0.0632335
Gansu	2011	4094.76	844.776	1291.82	2136.48	1014.6	87.24	6.8413	14.3989	1266.6	1187.76	0.135199	4278	3.16975	165.8	14.7	2376600	446	23347.7	45.0541	514			485261	0.0481138
Gansu	2012	4099.84	820.915	1297.58	2279.08	1096	92.13	7.3748	15.0374	1016.5	1358.16	0.138137	4931	3.1596	378.29	18.7	3023726	522	76551.8	47.8499	567			604762	0.126582
Gansu	2013	4155.94	801.208	1284.08	2418.46	1138.9	94.71	7.776	16.5791	1282.9	1517.74	0.138906	5589	3.2365	573.01	20.4	3465804	788	60348	50.36	622			669194	0.0901802
Gansu	2014	4197.51	782.166	1297.06	2545.71	1158.7	97.6	7.7832	17.6169	1618.4	1618.8	0.131751	6276.59	3.23617	676.49	21.3	3661710	1004	90251.8	51.26	684			768739	0.117402
Gansu	2015	4229.33	768.032	1306.72	2684.95	1154.6	97.92	7.8848	18.3735	1011.2	1722.09	0.140507	6936.21	3.2366	769.24	22.6	4970500	1189	70817.9	54.04	747			827203	0.0856113
Gansu	2016	4253.84	750.419	1317.51	1903.9	1117.5	93.42	6.9915	19.5092	1343.3	1778	0.136575	7456.85	3.2287	844.21	23.7	4881000	1451	110777	54.22	789			869850	0.127352
Gansu	2017	3752.03	733.481	1331.43	2018.59	1105.9	84.49	5.1995	17.2188	773.1	1559.64	0.11525	8076.06	2.81805	925.33	24.5	5207919	2495	113189	55.8547	825			884070	0.128032
Gansu	2018	3773.55	720.643	1337.54	2102.8	1151.4	83.17	4.2864	16.1272	764.2	1659.36	0.111726	8804.13	2.82126	1152.97	20.6	6783521	2924	131609	59.075	863			970537	0.135604
Gansu	2019	3831.57	706.49	1328.86	2174.01	1162.6	80.88	4.1938	15.2253	173.6	1887.58	0.120491	9628.94	2.88337	1669.55	30.8	7167584	3178	55003.8	61.694	872			1102446	0.0498925
Gansu	2020	3931.82	597	1338.6	2289.53	1202.2	80.3566	4.0312	15.2956	396	2103.61	0.13288	10344.3	2.93727	1912.48	34.9	7758300	4176	182728	65.7815	874			1096444	0.166655
Gansu	2021	3997.94	580	1338.6	2384.85	1231.5	77.0542	2.8107	17.0728	548	2439.54	0.133228	11432.8	2.98666	2280.72	38.3	7370418	3411	322610	114.005	874			1294694	0.249179
Gansu	2022	4061.94	614	1349.48	2516.66	1265	77.1271	2.7	17.8	487.9	2680.74	0.135275	12165.2	3.01	2484.03	51.3	7515136	3339	118761	108.92	874			1441494	0.0823876
Gansu	2023	4139.59	587	1423.7	2638.66	1272.9	76.6099	2.6	18.8	375.26	2927.7	0.138345	13131	2.90763	2676.7	55	762.61	1310	215805	135.9	872			1.56249e+06	0.138116
Qinghai	2011	547.73	121.82	251.67	430.693	103.4	8.27	0.1995	0.5406	285.5	230.819	0.0928378	4806	2.17638	69.44	7.1	1047400	45	16368.9	4.0709	154			125756	0.130164
Qinghai	2012	554.211	115.09	251.67	434.99	101.7	9.3	0.1805	0.5329	154.9	263.861	0.0934282	5594	2.20213	88.62	5.7	1343056	60	21060.6	4.4595	170			131228	0.160488
Qinghai	2013	555.774	116.6	186.895	410.58	102.4	9.8	0.1997	0.6472	171.2	310.302	0.0978248	6462	2.97372	125.07	6.2	1596910	105	15770.4	4.5	189			137541	0.11466
Qinghai	2014	553.7	116.2	182.494	440.9	104.8	9.74	0.1886	0.7046	169.8	327.492	0.0937473	7282.73	3.03407	140.61	6.1	1900408	147	13578.2	4.96	217			143235	0.0947966
Qinghai	2015	558.39	115.09	196.988	453.87	104	10.13	0.1956	0.7377	220.5	319.265	0.0864401	7933.41	2.83464	208.03	4.1	2044100	259	16002.2	5.91	246			115843	0.138137
Qinghai	2016	561.327	115.16	202.35	458.56	104.8	8.76	0.1939	0.7944	134.7	338.798	0.0859828	8664.36	2.77404	280.89	5.2	2323500	164	13077.8	5.94	279			139977	0.0934282
Qinghai	2017	555.314	114.79	206.61	462.35	102.5	8.67	0.1875	0.8416	272.4	364.097	0.0908287	9462.3	2.68774	334.87	4	2331198	405	15254.1	6.4153	307			179109	0.0851667
Qinghai	2018	557.253	110.14	214.04	472.09	103.1	8.32	0.1784	7.556	51.9	405.934	0.0935701	10393.3	2.6035	514.91	5.4	2678537	445	30431	6.5515	324			172951	0.175951
Qinghai	2018	557.253	110.14	214.04	472.09	103.1	8.32	0.1784	7.556	51.9	405.934	0.0935701	10393.3	2.6035	809.5	5.4	2678537	623	1724.6	6.5515	343			205680	0.00838485
Qinghai	2020	571.421	71	219.247	491.413	107.4	5.45	0.1233	0.7378	43	507.102	0.111214	12342.5	2.60629	941.43	11	2798000	888	3010.9	7.4998	374			213155	0.0141254
Qinghai	2021	583.867	69	219.2	493.319	109.1	4.88581	0.1069	0.7159	45	528.53	0.105389	13604.2	2.66363	1002.22	9.1	2510510	581	31734.5	14.4771	392			267745	0.118525
Qinghai	2022	586.191	72	222.014	503.27	107.3	4.7095	0.1	0.7	92.9	566.214	0.105316	14456.2	2.64033	1093.49	3.9	2751317	668	16462.8	14.5518	392			288425	0.0570783
Qinghai	2023	598.799	70	222.1	517.824	116.2	4.53913	0.1	0.8	41.01	575.6	0.101866	15614	2.69608	1304.66	8.1	271.36	249	27573.8	17.4	388			303113	0.0909687
Ningxia	2011	1260.39	163.8	477.59	768.73	359	38.24	0.2692	1.5244	434.7	354.68	0.0875935	5931	2.63906	67.18	10	1121900	90	13201.8	12.009	31			153183	0.0861833
Ningxia	2012	1241.18	155.5	491.35	787.28	375	39.44	0.274	1.5282	260.3	385.149	0.0851667	6776	2.52606	154.54	11.3	1397982	141	22034.8	12.7507	31			182304	0.120869
Ningxia	2013	1264.65	147.3	498.56	801.98	373.4	40.44	0.2699	1.6627	301.3	429.997	0.0865078	7599	2.53661	246.35	13	1493837	243	28269.4	13.84	33			209042	0.135233
Ningxia	2014	1253.16	134.5	498.91	813.02	377.9	39.6682	0.2586	1.5281	438.3	445.471	0.0788452	8410.02	2.5118	309	15.5	1570466	219	1552.86	13.56	34			238580	0.00650875
Ningxia	2015	1264.63	125.5	506.53	831.26	372.6	40.0881	0.2593	1.5642	218.8	483.021	0.0816548	9118.69	2.49666	328.64	18.8	1662700	246	15903.6	13.79	34			254842	0.0624059
Ningxia	2016	1275.24	117.6	515.15	580.54	370.7	40.72	0.2587	1.5137	390.4	493.605	0.0762484	9851.63	2.47547	396.08	16.5	2012900	455	14658.8	14.16	34			299269	0.0489819
Ningxia	2017	1132.63	106.3	511.45	605.38	370.1	40.7994	0.254	1.5087	174.4	517.417	0.0727793	10737.9	2.21454	536.47	13.2	2223884	736	51283.8	14.6279	34			389357	0.131714
Ningxia	2018	1164.57	98.3	523.447	621.88	392.6	38.3747	0.2266	1.4975	148.1	575.775	0.0755294	11707.6	2.22481	698.08	13.6	2190612	961	41847.4	15.0523	34			455793	0.0918123
Ningxia	2019	1152.96	90.6	538.286	632.153	373.2	38.438	0.2245	1.56	29.1	584.847	0.0746783	12858.4	2.14191	829.47	38.6	2181568	1170	64788.2	16.1156	34			545051	0.118866
Ningxia	2020	1174.23	83	552.531	644.089	380.5	38.0562	0.2174	1.6388	175	703.072	0.0862149	13889.4	2.12518	836.7	42.6	2534500	1525	52246.6	16.8478	34			596400	0.0876033
Ningxia	2021	1175.91	81	552.5	653.823	368.4	37.4564	0.2204	1.7958	376	759.805	0.0806004	15336.6	2.12834	897.12	49	2423738	1579	91866.4	40.6251	34			704410	0.130416
Ningxia	2022	1189.49	94	560.573	663.43	375.8	36.8764	0.2	2.1	68.6	845.922	0.0803811	16430.3	2.12192	1142.02	27.4	2448793	1756	103885	33.3462	34			793795	0.130871
Ningxia	2023	1199.1	84	564	673.175	378.8	36.6789	0.2	2.8	163.58	885.7	0.0805456	17772	2.12606	1382.77	21.7	274.52	626	120319	51.8	34			854985	0.140727
Xinjiang	2011	4983.47	600.97	3884.57	1796.68	1224.7	183.68	1.934	18.2977	678.3	1955.39	0.172318	5853	1.28289	1523.6	70.1	2975900	517	16530.6	71.6494	87			330031	0.0500881
Xinjiang	2012	5123.9	607.14	4029.07	1968.93	1517.4	192.7	1.9848	18.7756	1125.8	2275.67	0.175951	6876	1.27173	1923.32	122.7	3653939	635	69392.6	75.8081	94			397289	0.174665
Xinjiang	2013	5212.26	581.8	4769.89	2165.86	1377	203.221	2.1285	20.6666	564.8	2538.88	0.173889	7847	1.09274	2629.51	109.6	3874153	918	118797	83.92	96			454598	0.261323
Xinjiang	2014	5517.63	574.1	4831.89	2341.76	1414.5	236.98	3.0439	26.2921	1848.6	2744.01	0.165914	8723.83	1.14192	3182.45	81.6	4772699	950	41468.4	96.52	100			491587	0.0843561
Xinjiang	2015	5757.25	569.55	4944.92	2489.32	1895.3	248.093	2.5838	26.8901	960	2804.42	0.167197	9425.08	1.16428	3505.2	48.8	6053400	1361	73785.1	104.07	104			520010	0.141892
Xinjiang	2016	5867.52	573.87	4982.03	2552.15	1552.3	250.21	2.7596	26.6198	808	2969.7	0.170883	10183.2	1.17774	3614.19	54	7170200	1530	72127.4	108.16	106			566301	0.127366
Xinjiang	2017	5886.96	546.62	4952.29	2638.84	1484.7	250.74	2.767	25.2646	287.5	3326.59	0.142607	11045.3	1.18874	3992.41	86.6	6124893	1502	90361.7	111.133	107			569519	0.158663
Xinjiang	2018	6068.89	539.62	4883.46	2731.79	1504.2	254.99	2.3732	26.9839	746	3637.79	0.138706	11974.5	1.24274	4850.94	130.3	7532460	1232	79055.6	119.545	108			643135	0.122922
Xinjiang	2019	6169.99	489.16	4959.89	2788.97	1527.1	257.763	2.2948	26.2677	572.6	3850.65	0.131039	13121.7	1.24398	6683.46	140	9774128	1501	62549.4	124.825	108			641033	0.097576
Xinjiang	2020	6280.01	460	4893.35	2929.44	1583.4	248.227	2.1823	25.9674	638	4315.61	0.143596	14056.1	1.28338	7869.57	111.8	11278800	2665	83237	127.505	108			615662	0.135199
Xinjiang	2021	6387.42	455	4893.4	2995.88	1735.8	240.686	2.0388	26.1479	692	5143.12	0.147407	15575.3	1.30531	7037.93	126.7	8495539	2490	72703	269.919	107			783118	0.0928378
Xinjiang	2022	6493.13	481	6534.69	3075.35	1813.5	243.682	2	27.9	237.2	5469.04	0.141438	16549.9	0.99364	7486.4	89.6	9500928	2545	79696.9	218.716	107			909849	0.0875935
Xinjiang	2023	6839.83	446	6629.6	3181.07	2119.2	247.659	1.9	31.3	412.97	5648.3	0.143376	17948	1.03171	8056.56	89.4	1317.08	1311	199058	313.1	105			1.15518e+06	0.172318
