# Supplementary material
Source: Research Square preprint supplement (doi:10.21203/rs.3.rs-9391188/v1)
Supplement: Supplementary file 2 [file 41eb177ecbe4a4c864e26499.xlsx]

## Sheet: entropy weight method
		Resistance capacity												Recovery capacity				Reconfiguration capacity				DIF
		Productivity resilience					Ecological resilience				Economic resilience			Recovery resilience				Innovation resilience
ID	YEAR	Total sown area of crops	Number of employees in the primary industry	Cultivated land irrigated area	Farm machinery production	Grain yield	Fertilizer application	Pesticide application	Usage of agricultural plastic films	Affected area	Agricultural, forestry, livestock, andfishery output	Proportion of primary industry added value in local gross domestic product	Per capita disposable income of rural residents	Multiple-cropping index	Insurance premium income of agricultural insurance	Investment in agricultural fixed assets	Agriculture, forestry and water expenditure	Number of agricultural patents	Expenditure on agricultural science and technology	Rural electricity consumption	Number of leading enterprises in agriculture-related sectors	coverage_breadth	usage_depth	digitization_level
Beijing	2011	302.58	58.05	209.33	265.197	121.8	13.84	0.3936	1.3268	56.1	363.138	0.00838485	13742	1.44547	430.8	6.5	1873400	2505	22581	45.4009	176	97.53	72.23	32.59
Beijing	2012	282.715	56.32	207.54	241.1	113.8	13.67	0.3879	1.2549	71.2	395.713	0.00840073	15365	1.36222	512.61	7.7	2226932	2791	170585	47.3121	183	155.56	159.42	118.47
Beijing	2013	242.455	55.4	153.02	207.72	96.1	12.7809	0.3864	1.2356	26.9	421.783	0.0081729	17101	1.58447	558.06	2	2976191	3543	1.20441e+06	48.53	183	193.86	247.5	229.57
Beijing	2014	196.104	52.4	143.11	195.76	63.9	11.6398	0.3603	1.0903	53.3	420.067	0.00745353	18867.3	1.3703	451.61	3.3	3436680	3690	685741	50.56	187	243.92	219.89	235.22
Beijing	2015	173.73	50.3	137.35	186.05	62.6	10.5284	0.3174	1.0402	6.2	368.237	0.00609222	20568.7	1.26487	574.05	1.7	4247800	4285	1.53835e+06	51.67	190	268.39	234.17	379.48
Beijing	2016	151.363	49.6	128.47	144.45	52.8	9.653	0.3031	0.9867	34.7	338.063	0.00505627	22309.5	1.1782	600.12	1.7	4435500	4710	1.30278e+06	54.71	191	285.649	263.738	329.897
Beijing	2017	120.939	48.4	115.479	133.51	41.1	8.5494	0.2726	0.8973	6.7	308.317	0.00429842	24240.5	1.04728	638.74	2.5	5183464	5302	1.92016e+06	61.5078	191	316.118	357.237	326.019
Beijing	2018	103.789	45.4	109.672	125.654	34.1	7.2934	0.2574	0.8243	4.7	296.769	0.00391458	26490.3	0.946358	777.2	1	5760413	5338	4.14377e+06	65.137	191	353.867	366.782	420.189
Beijing	2019	88.55	42.4	109.243	122.842	28.8	6.1727	0.2257	0.7699	2.5	281.704	0.00321419	28928.4	0.810578	815.78	0.9	5846243	5903	45458.2	67.7672	191	384.656	402.07	440.826
Beijing	2020	98.183	41.3	109.35	120.22	30.5	6.0626	0.2149	0.7562	2	263.432	0.00298068	30125.7	0.897878	993.66	5.1	4973300	6803	920999	69.3446	191	397.002	445.833	436.022
Beijing	2021	117.847	27	109.4	121.246	37.8	6.29715	0.2334	0.7174	15	269.514	0.00276387	33302.7	1.07721	1304.92	4.9	4978660	6068	742742	66.8803	190	432.927	474.298	434.35
Beijing	2022	143.813	25	112.135	121.143	45.4	6.6087	0.2	0.7	9.2	268.176	0.00267959	34753.8	1.2825	1515.22	0.9	4627897	5156	2.11305e+06	60.6272	189	455.927	445.598	455.774
Beijing	2023	158.978	24	118	123.944	47.8	6.74971	0.2	0.7	15.05	252.6	0.00241084	37358	1.34727	1788.64	1.3	515.53	2083	1.7446e+06	73	189	466.275	459.052	463.237
Tianjin	2011	467.98	65	338	583.87	161.8	24.39	0.3796	1.2568	8.1	349.485	0.0141254	11941	1.38456	57.42	8.3	917800	848	226591	51.2968	36	69.37	53.33	44.72
Tianjin	2012	478.97	61	337.04	568.13	163.6	24.45	0.3808	1.2401	133.6	375.624	0.0133086	13593	1.42111	93.5	5.9	1009766	1055	254744	51.6155	37	110.61	135.77	140.44
Tianjin	2013	473.511	56	308.87	554.18	174.7	24.34	0.3639	1.2901	7.8	412.364	0.0130487	15353	1.53304	165.48	3.6	1230282	1515	388047	69.22	37	146.54	197.52	229.67
Tianjin	2014	479.027	56	308.87	552.33	176	23.27	0.3642	1.2274	10.3	441.713	0.0127107	17014.2	1.5509	196.87	2.6	1349089	1638	422471	109.04	37	193.86	180.28	257.11
Tianjin	2015	469.024	53	308.871	546.92	184.5	21.7797	0.3528	1.0552	13.2	467.437	0.0126265	18481.6	1.51851	256.5	1.5	1560800	2142	471421	102.44	38	211.89	195.46	398.62
Tianjin	2016	479.169	51	306.62	469.99	200.4	21.3582	0.3307	1.1644	24	494.443	0.0123128	20075.6	1.56275	292.75	3.2	1610200	2790	219435	92.19	38	225.412	231.615	339.147
Tianjin	2017	439.519	48	306.62	464.65	212.3	18.0099	0.2353	1.0906	13.2	382.066	0.00910875	21753.7	1.43343	384.07	2.3	1583633	2901	753487	40.3199	38	257.904	310.133	322.905
Tianjin	2018	429.274	45	304.66	347.98	209.7	16.9476	0.219	0.907	14.4	390.501	0.00918199	23065.2	1.40903	497.91	3.7	1657067	3401	982947	36.9145	38	295.348	317.938	386.104
Tianjin	2019	410.271	43	304.798	359.838	223.3	16.239	0.2171	0.8096	13.2	414.355	0.0131329	24804.1	1.34604	511.27	6.9	1615128	3383	318627	39.2351	38	323.857	349.013	402.111
Tianjin	2020	419.171	36	299.121	365.084	228.2	15.2873	0.1997	0.7521	17	476.443	0.0149236	25690.6	1.40134	609.32	5.7	1548200	3891	488505	41.0114	38	340.29	373.907	408.738
Tianjin	2021	437.002	34	299.1	372.484	249.9	15.6578	0.1742	0.7139	6	509.258	0.0143612	27954.5	1.46106	631.13	3.9	1480091	2809	794843	62.0397	38	381.745	404.557	425.921
Tianjin	2022	443.511	33	293.975	370.768	256.2	15.5226	0.2	0.7	4.7	521.435	0.016743	29017.8	1.50867	653.32	1.5	1102973	2265	796810	52.4729	38	407.211	377.923	461.032
Tianjin	2023	453.098	32	309	368.799	255.7	15.4379	0.2	0.6	26.25	511.3	0.016042	30851	1.46634	743.44	5.8	126.95	926	538450	70.9	37	423.543	396.641	468.471
Hebei	2011	8773.69	1485	4596.61	10349.2	3172.6	326.279	8.3006	12.3785	1383.3	4895.88	0.118525	7187	1.90873	760.47	162.3	3661000	652	157907	559.215	607	18.46	44.19	57.15
Hebei	2012	8781.79	1418	4603.07	10553.8	3442.6	329.33	8.4831	12.6941	1329	5340.11	0.119912	8158	1.90781	1286	152.6	4436217	800	340007	593.939	664	65.46	108.15	133.9
Hebei	2013	8749.22	1375	4349.03	10762.7	3365	331.04	8.672	13.6006	1106.5	5832.94	0.123068	9188	2.01176	1682.9	106.6	5111085	1069	287115	616.37	713	105.66	162.85	242.35
Hebei	2014	8713.08	1338	4404.22	10942.9	3360.2	335.61	8.6329	13.7918	1435.7	5994.79	0.117176	10186.1	1.97835	1790.25	83.4	5835187	1283	252179	631.33	768	149.97	131.34	249.86
Hebei	2015	8739.84	1292	4447.98	11102.8	3602.2	335.492	8.3328	13.7983	1798.8	5978.88	0.115394	11050.5	1.9649	2201.96	89.7	7124900	1776	503065	611.82	805	172.78	151.45	375.2
Hebei	2016	8716.64	1186	4457.64	7401.97	3783	331.788	8.1691	13.8434	1447.2	6083.86	0.108911	11919.4	1.95544	2287.1	88.7	8007900	2080	10274.3	600.78	825	191.55	196.874	321.46
Hebei	2017	8381.65	1086	4474.67	7580.58	3829.2	321.996	7.7623	12.81	718	5373.38	0.0920141	12880.9	1.87313	2575.44	77	7829133	3085	75683.6	615.156	832	232.892	273.451	313.865
Hebei	2018	8197.13	982	4492.33	7706.2	3700.9	312.396	6.145	10.9833	557	5707	0.0926958	14030.9	1.82469	3074.58	70.6	9062657	3771	520177	505.157	833	264.062	267.925	371.55
Hebei	2019	8132.69	938	4482.16	7830.72	3739.2	297.269	5.7344	10.3211	314.7	6061.46	0.100228	15373.1	1.81446	3651.06	44.9	9782658	5113	296242	501.568	834	284.387	297.331	387.383
Hebei	2020	8089.44	815	4470.03	7965.74	3795.9	285.707	5.4289	10.3742	371	6742.49	0.107166	16467	1.80971	4942.9	55.3	9887400	6698	726915	509.798	835	304.095	318.415	391.919
Hebei	2021	8097.2	777	4470	8096.81	3825.1	276.866	5.2691	10.2039	389	7018.67	0.0997815	18178.9	1.81145	5171.52	48.6	9247909	5486	668330	476.089	834	335.689	352.951	406.843
Hebei	2022	8113.99	820	4102.86	8249.08	3865.1	271.635	5.1	10.1	135.3	7667.41	0.104089	19364.2	1.97764	6405.95	33.1	8721444	5216	1.09707e+06	471.254	834	357.947	321.47	440.797
Hebei	2023	8098.23	789	4122	8403.77	3809.9	266.426	5	10.2	643.78	7770.9	0.101634	20688	1.96464	7273.44	53.1	928.51	2112	2.07064e+06	595.9	835	375.303	343.059	438.843
Shanxi	2011	3797.42	509	1319.85	2927.3	1193	114.567	2.8382	4.1531	1015	1207.57	0.0570783	6225	2.87715	259.26	48.4	2414500	369	2463.25	86.5984	695	28.94	21.61	69.57
Shanxi	2012	3808.14	517	1319.06	3056.09	1309.4	118.279	2.981	4.5864	931	1304.26	0.0576513	7064	2.88701	390.68	52.6	3096278	467	53416.3	94.9517	798	75.2	86.48	163.5
Shanxi	2013	3782.44	536	1382.79	3183.3	1312.8	121.02	3.0534	4.6399	1592.4	1447.01	0.0610971	7949	2.73536	472.72	54	3396864	525	46361.1	99.78	924	115.4	139.08	248.75
Shanxi	2014	3783.43	484	1408.17	3286.2	1330.8	119.614	3.1029	4.8381	1173.5	1530.48	0.061818	8809.44	2.68677	573.75	59	3278530	689	118712	97.08	1036	163.16	124.78	260.43
Shanxi	2015	3767.71	468	1460.28	3351.65	1314	118.547	3.1035	4.7864	1142.6	1522.64	0.061345	9453.91	2.58014	566.13	63.6	3944600	696	76761.4	96.83	1161	186.14	141.52	390.57
Shanxi	2016	3720.81	469	1487.29	1744.26	1380.3	117.072	3.055	4.8922	503.7	1534.03	0.0601345	10082.5	2.50174	636.18	72.9	4320200	1000	101366	97.52	1291	205.505	189.377	352.958
Shanxi	2017	3577.62	458	1511.21	1376.3	1355.1	111.998	2.8831	4.9998	821.3	1418.73	0.0463125	10787.5	2.36739	778.04	71.1	4779052	1494	106784	99.2646	1418	243.023	254.979	324.922
Shanxi	2018	3555.16	437	1518.68	1441.09	1380.4	109.611	2.6543	4.9067	830.8	1460.64	0.0440382	11750	2.34096	941.86	70.2	5813350	1643	166707	101.416	1506	277.029	249.73	367.194
Shanxi	2019	3524.42	425	1519.34	1517.57	1361.8	108.409	2.5319	4.8555	1473.7	1626.54	0.0484369	12902.4	2.3197	1148.97	54	6260441	1883	177457	104.9	1578	305.61	277.891	375.065
Shanxi	2020	3541.51	438	1517.38	1595.26	1424.3	107.41	2.4866	4.8592	1030	1935.84	0.0536304	13878	2.33397	1552.27	48	6536800	2265	199592	109.229	1668	327.287	291.365	383.036
Shanxi	2021	3587.95	401	1517.4	1654.25	1421.2	105.642	2.3594	4.789	1163	2134.02	0.0569673	15308.3	2.36454	2065.13	53.1	5142286	1790	104182	156.43	1700	363.631	331.727	397.581
Shanxi	2022	3611.59	414	1502.01	1714.27	1464.3	103.474	2.3	4.9	372.2	2211.59	0.0522724	16322.7	2.4045	2406.17	37.9	5768666	1536	444367	156.158	1715	388.713	294.191	421.915
Shanxi	2023	3641.72	399	1490.9	1803.54	1478.1	103.219	2.2	5.3	440.37	2291.7	0.0540466	17677	2.44263	2688.42	39.8	660.99	679	620038	194	1683	403.583	328.767	421.168
Inner Mongolia	2011	7109.9	678.2	3072.39	3172.7	2387.5	176.938	2.4474	6.066	2036.6	2204.51	0.0909687	6942	2.31413	1700.13	72.7	3916800	410	58830.6	52.2992	76	24.65	30.27	40.35
Inner Mongolia	2012	7153.97	655.8	3125.24	3280.56	2739.8	189.035	2.9924	6.9234	2060.7	2449.34	0.0912171	7956	2.28909	1920.62	90.1	4508331	438	106619	55.1546	81	75.03	95.44	139.78
Inner Mongolia	2013	7211.18	632.6	2957.76	3430.57	2773	202.424	3.1332	8.0822	1733.1	2699.5	0.0945473	8985	2.43805	2784.19	69.3	4665816	533	166280	59.56	85	116.37	138.84	260.45
Inner Mongolia	2014	7355.96	609.4	3011.88	3632.55	2753	222.668	3.0875	8.9409	1878.3	2779.81	0.0916057	9976.3	2.44232	3002.72	82.6	5176937	661	169243	63.12	87	165.46	114.88	300.84
Inner Mongolia	2015	7567.9	584.3	3086.9	3805.11	3292.6	229.35	3.2961	9.5021	2700.8	2751.55	0.0907057	10775.9	2.45162	3135.26	72.9	6755800	772	114969	72.26	87	185.34	136.04	453.66
Inner Mongolia	2016	7921.9	555.9	3131.53	3331.1	3263.3	234.643	3.2339	9.5631	3629.9	2794.22	0.0903233	11609	2.52972	3206.35	79.8	7290200	834	115916	71.09	88	201.997	184.89	403.997
Inner Mongolia	2017	9014.22	533.5	3174.83	3483.55	3254.5	235.04	3.5618	9.4306	3917.3	2813.54	0.102494	12584.3	2.83928	3253.54	78.9	8077146	1169	179007	78.901	88	238.92	249.198	340.096
Inner Mongolia	2018	8824.07	507.3	3196.52	3663.66	3553.3	222.672	2.9585	9.3969	2629.8	2985.32	0.10144	13802.6	2.76052	3546.11	118.2	9039647	1285	136088	85.5097	88	269.492	232.313	349.765
Inner Mongolia	2019	8885.02	475.2	3199.19	3866.42	3652.5	218.437	2.7278	9.4194	1453.5	3176.34	0.108246	15282.8	2.77727	3964.36	105.3	8747335	1704	118811	91.1554	88	291.449	260.313	362.977
Inner Mongolia	2020	8882.81	443	3199.12	4056.58	3664.1	207.694	2.3426	9.5297	2368	3472.36	0.116656	16566.9	2.77664	4394.66	126.1	8675900	2381	227815	93.2132	88	310.4	275.657	367.4
Inner Mongolia	2021	8743.34	422	3199.1	4239.42	3840.3	241.898	2.6692	10.026	1284	3815.12	0.108471	18336.8	2.73306	5388.72	134.1	8188391	2166	5253.01	119.79	88	346.889	318.603	385.276
Inner Mongolia	2022	8750.68	439	4379.31	4596.42	3900.6	227.364	2.5	11.5	1394.9	4316.76	0.114588	19640.9	1.99819	6747.54	117.9	9124350	2248	30088.6	103.287	88	376.309	285.822	403.613
Inner Mongolia	2023	8808.87	416	4809	4924.95	3957.8	220.803	2.5	12.7	2223.84	4447.3	0.11115	21221	1.83175	7465.6	120.4	982.68	1149	227649	178.1	88	394.396	323.73	401.873
Liaoning	2011	4145.68	699.9	1588.38	2399.89	2035.5	144.64	5.6565	14.3348	450.2	3633.63	0.0861833	8011	2.61	571.34	67.1	3292000	929	207267	366.33	113	44.96	44.64	35.33
Liaoning	2012	4210.57	694.7	1698.82	2526.89	2175	146.902	5.9053	14.5054	355.4	4062.43	0.0867658	9061	2.47852	743.07	73.4	4050175	938	423979	373.437	115	89.01	120.36	120.91
Liaoning	2013	4208.76	683.8	1407.84	2631.98	2195.6	151.761	6.0035	14.6068	450.5	4349.72	0.0853126	10161	2.98951	1095.51	79	4665248	1131	397982	394.78	115	126.67	181.54	231.33
Liaoning	2014	4164.1	687.9	1473.97	2730.22	1753.9	151.55	6.0294	14.6207	1931.4	4498.36	0.0798471	11191.5	2.82509	1143.2	89.8	4438501	1116	510891	433.07	118	175.49	162.89	272.53
Liaoning	2015	4219.86	689.4	1520.31	2813.86	2186.6	152.087	5.9875	14.1942	1482.8	4686.71	0.083157	12056.9	2.77567	1624.58	91	4460700	1242	845775	457.76	120	194.17	178.41	420.06
Liaoning	2016	4064.1	705.4	1572.99	2168.45	2315.6	148.058	5.6264	13.7273	581.9	4421.78	0.0976792	12880.7	2.58368	1807.98	113.9	4807300	1398	8624.73	489.8	121	207.737	220.062	330.215
Liaoning	2017	4172.32	714.8	1610.55	2215.14	2330.7	145.466	5.7474	12.4791	949.6	3851.62	0.0812619	13746.8	2.59062	1984.68	105.9	4592318	1806	174459	528.006	123	239.872	291.265	313.574
Liaoning	2018	4207.11	711.8	1619.33	2243.72	2192.4	145.024	5.507	11.7976	1467.3	4061.93	0.0803189	14656.3	2.59807	2314.36	101.4	4617437	2235	138251	306.216	123	271.813	279.476	375.012
Liaoning	2019	4217.1	671.4	1629.17	2353.89	2430	139.906	5.1074	11.3505	324.7	4368.25	0.0874275	16108.3	2.58849	2823.05	142.3	5025729	3025	397757	176.972	123	292.444	302.521	387.77
Liaoning	2020	4287.78	631	1632.54	2471.26	2338.8	137.568	4.4722	11.4381	1322	4582.56	0.0909661	17450.3	2.62645	3600.41	156	5048300	4727	325925	184.557	121	307.112	328.118	386.333
Liaoning	2021	4328.94	600	1632.5	2552.6	2538.7	135.03	4.3386	11.4384	249	4927.73	0.0892471	19216.6	2.65172	3699.84	175	4094414	3930	473188	167.916	119	340.1	363.898	401.725
Liaoning	2022	4326.86	634	1716.63	2657.84	2484.5	130.507	4.2	11.3	797.4	5180.03	0.0896494	19908	2.52055	5089.78	164	4633392	3377	450505	130.049	118	364.922	333.106	424.745
Liaoning	2023	4361.42	589	1721.2	2823.85	2563.4	129.509	4.1	11.4	328.35	5266.8	0.0877541	21483	2.53394	6002.96	153.6	490.96	1319	645665	191.7	118	380.977	352.374	424.89
Jilin	2011	5222.32	651.88	1807.52	2355.04	3171	195.199	4.5595	5.7069	616.4	2275.15	0.120869	7634	2.88922	800.68	124.2	2555700	472	83081.4	42.5072	801	23.75	24.04	27.86
Jilin	2012	5315.14	628.98	1851.87	2554.65	3450.2	206.73	5.1239	5.67	632.8	2502.02	0.118275	8741	2.87015	883.31	171.4	2913003	497	103045	46.1174	878	69.43	93.83	133.99
Jilin	2013	5413.06	607.09	1510.13	2730.04	3551	216.79	5.1011	5.8485	623.2	2670.6	0.11569	9781	3.58449	926.94	186.7	3182647	617	48153.5	48.23	958	106.85	147.95	224.97
Jilin	2014	5615.29	586.53	1628.43	2919.09	3532.8	226.66	5.9517	5.7858	689.3	2763.01	0.11041	10780.1	3.44828	921.21	176.5	3086795	612	212169	48.75	1046	154.91	136.01	254.75
Jilin	2015	5679.1	566.9	1790.87	3152.54	3974.1	231.24	6.2285	5.9164	846.2	2880.62	0.113508	11326.2	3.17114	1107.7	91.8	4086100	746	273943	49.6	1105	175.49	154.68	413.47
Jilin	2016	5676.32	546.24	1832.17	3105.26	4150.7	233.607	5.8523	5.9565	748.2	2724.88	0.10141	12122.9	3.09814	1482.84	98.5	5505000	887	96235.5	51.13	1168	191.939	204.138	323.59
Jilin	2017	6086.2	526.54	1893.05	3284.65	4154	231.025	5.6294	6.0752	983.1	2064.29	0.073295	12950.4	3.21502	1725.51	102.4	5547674	1055	134588	52.9617	1226	227.446	273.624	310.718
Jilin	2018	6080.89	508.58	1893.05	3466	3632.7	228.297	5.0991	5.6216	1319.7	2184.34	0.0770003	13748.2	3.21222	2024.22	115.4	5375508	1289	160378	54.8539	1253	256.546	255.226	378.464
Jilin	2019	6117.05	489.61	1909.5	3653.74	3877.9	227.058	4.8658	5.313	536.2	2442.73	0.109776	14936	3.20348	2279.41	92.7	5643475	1375	211543	54.8765	1276	275.748	275.929	379.62
Jilin	2020	6150.99	471.99	1905.44	3896.95	3803.2	225.294	4.693	5.1364	1219	2976	0.126144	16067	3.22813	2693.35	100.7	5777600	2010	125834	56.5596	1282	290.781	297.632	385.286
Jilin	2021	6187.06	454	1905.4	4149.23	4039.2	222.999	4.5139	4.7651	245	2972.32	0.117396	17641.7	3.24712	3712	132.2	4623191	1969	148482	72.3053	1282	325.382	334.223	395.198
Jilin	2022	6226.36	479	1906.47	4357.86	4080.8	222.746	4.4	4.6	193	3217.91	0.129233	18134.5	3.2659	4746.04	107.1	5154893	1755	249510	58.7747	1281	347.63	300.71	408.663
Jilin	2023	6292.47	451	1949.3	4548.57	4186.5	222.496	4.2	4.6	260.77	3128	0.121556	19472	3.22807	5426.77	107.9	618.3	743	221568	87	1280	362.765	329.41	405.251
Heilongjiang	2011	12222.9	677.71	4332.65	4097.84	5570.6	228.437	7.7958	7.5589	1536.8	3223.51	0.135233	7382	2.82112	1640.59	207.7	3559800	1045	103796	58.2411	117	21.12	36.28	69.83
Heilongjiang	2012	12237	667.32	4776.48	4552.93	6598.6	240.28	8.0511	8.459	2429.4	3952.31	0.154377	8367	2.56193	2215.89	211.5	4303941	1276	215153	64.3269	119	66.48	100.46	135.89
Heilongjiang	2013	12200.8	693	5342.12	4849.28	6004.1	244.96	8.4016	8.5378	2734.1	4633.26	0.174113	9369	2.28389	2832.96	158.1	4616956	1477	4911.67	66.95	127	104.49	152.58	242.97
Heilongjiang	2014	12225.9	719.2	5305.2	5155.52	6242.2	251.93	8.7381	8.4424	810	4894.8	0.173635	10453.2	2.30452	2605.6	158.7	4876670	1657	24078.8	69.56	128	152.48	142.48	264.41
Heilongjiang	2015	12294	694.2	5530.84	5442.29	7615.8	255.31	8.2949	8.3097	1175.3	5044.93	0.174593	11095.2	2.22282	2894.8	172.6	6814800	2161	168966	72.58	129	174.68	164.06	409.72
Heilongjiang	2016	12426.5	664.2	5932.74	5634.27	7416.1	252.75	8.2474	8.2575	4223.7	5197.75	0.173563	11831.9	2.09457	3184.24	169.6	8017700	2175	81788.9	77.47	129	191.241	206.542	350.968
Heilongjiang	2017	14767.6	632	6030.97	5813.76	7410.3	251.2	8.3218	7.977	1550.5	5586.63	0.186462	12664.8	2.44863	3546.12	166.8	8151611	2695	171005	79.7667	133	225.996	275.861	323.77
Heilongjiang	2018	14673.3	606.2	6119.57	6084.65	7506.8	245.64	7.4182	7.7431	4155	5624.29	0.183415	13803.7	2.39777	3968.71	175	8344713	2636	122793	82.8042	131	256.123	254.882	372.281
Heilongjiang	2019	14770.1	569.2	6177.59	6359.08	7503	223.266	6.4267	7.1831	3540.7	5929.97	0.233786	14982.1	2.39091	4327.78	136.7	8819893	3697	184868	85.6368	131	275.789	274.641	382.409
Heilongjiang	2020	14910.1	538	6171.6	6775.09	7540.8	224.216	6.0749	7.0501	3179	6438.11	0.250998	16168.4	2.41592	5119.58	178.9	9145300	4956	434629	89.7225	131	290.479	293.695	380.091
Heilongjiang	2021	15065	516	6171.6	6912.13	7867.7	238.966	5.709	6.1009	832	6459.97	0.232741	17889.3	2.44102	5760.77	244.4	8689781	4069	5207.4	117.141	130	327.594	335.196	396.686
Heilongjiang	2022	15209.4	518	6152.89	7090.88	7763.1	238.504	5.5	5.8	97.4	6718.24	0.227017	18577.4	2.47191	6878.82	190.6	9375922	3370	96191.7	86.2738	130	349.679	305.346	417.503
Heilongjiang	2023	15304.2	472	6238.5	7339.57	7788.2	238.599	5.5	5.6	410.08	6492.5	0.221501	19756	2.45319	8037.81	137	1087.15	1278	76978.8	120.2	129	365.075	332.192	408.28
Shanghai	2011	400.63	37.28	199.61	105.68	122	11.97	0.6295	2.0489	24.3	314.578	0.00650875	15737	2.00706	568.51	0.1	1615400	1549	492113	204.281	35	98.85	86.24	7.58
Shanghai	2012	387.91	45.7	199.02	112.73	136	10.99	0.5817	1.93	14.7	321.726	0.00633246	17452	1.9491	457.82	0.4	2179673	1802	422858	208.979	35	149.35	174.72	111.94
Shanghai	2013	377.31	46.36	184.09	113.17	114.2	10.7833	0.5019	1.9436	28	323.483	0.00592534	19208	2.0496	511.19	0.4	1872459	1983	677747	874.38	35	187.31	280.93	230.3
Shanghai	2014	356.982	44.81	184.09	117.76	112.5	10.1538	0.4666	1.9287	12.1	322.221	0.00527247	21191.6	1.93917	634.24	0.1	2023368	2136	632214	885.64	35	237.02	242.78	241.88
Shanghai	2015	340.211	46.01	188.21	119.01	125.4	9.9173	0.4415	1.803	12.3	302.622	0.00437121	23205.2	1.80761	807.28	0.5	2673700	2338	911298	919.19	35	258.98	259.81	374.54
Shanghai	2016	294.697	45.45	189.81	122.31	111.8	9.1607	0.3913	1.7062	3.1	285.086	0.00388486	25520.4	1.55259	642.17	0.1	3274100	2756	998008	983.22	35	274.245	281.475	309.944
Shanghai	2017	284.947	42.44	190.755	121.84	99.8	8.8963	0.3523	1.5664	12.1	292.613	0.00361636	27825	1.49379	684.71	0.5	4565332	3054	1.22318e+06	1013.2	36	305.888	396.049	330.311
Shanghai	2018	282.268	40.83	190.755	93.97	103.7	8.37	0.3177	1.4781	7.3	289.581	0.00319371	30374.7	1.47974	739.79	0.4	4698762	3663	585349	1053.42	36	346.332	400.397	440.26
Shanghai	2019	261.394	40.8	190.755	98.0381	95.9	7.5328	0.2771	1.3213	8.7	284.843	0.00272256	33195.2	1.37031	866.05	0.2	5231036	4233	2.44668e+06	1102.04	36	378.251	439.912	462.228
Shanghai	2020	255.16	40.81	165.046	102.122	91.4	6.8937	0.2644	1.2864	5	279.823	0.00267619	34911.3	1.54599	823.41	0.3	4738000	5952	3.31754e+06	1087.15	36	395.204	488.683	450.08
Shanghai	2021	264.346	25	165	102.742	94	6.59378	0.2384	1.1712	25	268.93	0.00231402	38520.7	1.6021	1075.15	0.1	4557704	5775	1.31251e+06	11.3186	37	433.423	510.694	449.364
Shanghai	2022	269.171	21	160.615	100.193	95.6	6.5559	0.2	1.2	4.2	273.531	0.00217232	39729.4	1.67588	1317.96	0.2	3886182	4394	2.26565e+06	6.0924	37	455.912	465.823	467.172
Shanghai	2023	273.196	20	161.6	105.374	101.9	6.43945	0.2	1.2	0.35	269.6	0.00203521	42988	1.69057	1530.24	0.6	399.14	2021	2.92022e+06	12.4	37	466.54	485.419	476.896
Jiangsu	2011	7663.25	992.59	3817.92	4106.11	3307.8	337.21	8.65	10.644	1032.1	5237.45	0.0624059	10744	2.00718	889.71	70.2	6181300	3753	1.56378e+06	1606.83	809	66.7	79.22	15.71
Jiangsu	2012	7651.56	958.88	3929.72	4214.64	3431.6	330.95	8.3675	11.255	697.5	5808.81	0.0632335	12133	1.9471	1188.94	72.4	7540892	5191	1.01967e+06	1696.41	886	106.69	156.55	109.94
Jiangsu	2013	7683.63	929.63	3785.27	4405.62	3423	326.83	8.1157	11.6846	487.1	6158.03	0.0610188	13521	2.02988	1572.6	57.6	8683385	6846	1.28824e+06	1801.86	956	144.68	223.09	224.3
Jiangsu	2014	7678.62	890.37	3890.53	4649.98	3490.6	323.61	7.9531	11.9846	554.1	6443.37	0.0558369	14958.4	1.97367	1619.41	69.9	8993111	7421	2.19627e+06	1834.93	1021	193.18	201.09	246.02
Jiangsu	2015	7745.04	845.69	3952.5	4825.49	3594.7	319.99	7.81	11.3243	615.5	7030.76	0.0568491	16256.7	1.95953	1651.94	69.1	10086000	8086	2.00321e+06	1836.19	1090	215.94	218.62	382.84
Jiangsu	2016	7676.92	814.84	4054.07	4906.55	3542.4	312.52	7.6184	11.3941	301.1	7235.06	0.0526847	17605.6	1.89363	1694.17	70.8	9856200	9857	1.74747e+06	1869.27	1158	233.219	253.077	322.8
Jiangsu	2017	7556.4	769.9	4131.88	4991.41	3610.8	303.85	7.3167	11.5085	90.7	7161.21	0.0471081	19158	1.8288	1755.68	75.8	9182185	11230	3.24536e+06	1887.99	1213	272.323	328.93	324.693
Jiangsu	2018	7520.23	737.92	4179.83	5017.71	3660.3	292.45	6.96	11.6064	380	7192.46	0.0447292	20845.1	1.79917	1888.84	73.4	9966743	13550	80497.1	1933.14	1256	311.951	333.085	408.619
Jiangsu	2019	7442.63	706.06	4205.44	5111.95	3706.2	286.21	6.7396	11.4153	224.2	7503.15	0.0431217	22675.4	1.76976	3512.96	68.5	10323708	17328	365031	1949.11	1298	341.499	365.496	422.918
Jiangsu	2020	7478.4	675.23	4224.73	5213.83	3729.1	280.75	6.5703	11.1776	136	7952.59	0.0441663	24198.5	1.77015	4462.06	59.3	10912500	21626	3.01277e+06	2010.96	1313	362.109	395.006	421.699
Jiangsu	2021	7514.45	630	4224.7	5148.24	3746.1	275.555	6.3547	10.5775	88	8279.72	0.0405829	26790.8	1.77869	5315.79	58.6	11062019	17690	1.66553e+06	520.221	1315	398.656	428.998	430.835
Jiangsu	2022	7534.24	626	3851.74	5264.08	3769.1	270.137	6.1	10.2	79	8733.8	0.0403611	28486.5	1.95606	6428.04	52.7	11083588	14529	4.1517e+06	542.015	1302	424.767	401.97	461.921
Jiangsu	2023	7589.96	620	3856.7	5360.21	3797.7	267.037	6	10	29.64	8935.5	0.039586	30488	1.96799	7431.41	64.4	1187.82	5521	3.6827e+06	610.5	1291	440.634	421.771	462.53
Zhejiang	2011	2462.71	535.77	1456.8	2461.25	781.6	92.07	6.3854	5.8416	431.1	2534.9	0.0489819	14197	1.69049	294.84	38.1	3733200	3604	656549	847.999	110	85.53	93.52	21.22
Zhejiang	2012	2324.16	498.99	1471.02	2489.4	648.2	92.1505	6.2874	6.2287	554.2	2658.66	0.0481138	15806	1.57997	538.67	41.7	4082038	5484	1.6893e+06	869.87	112	128.5	200.42	107.07
Zhejiang	2013	2311.94	460.98	1409.39	2462.2	734	92.4278	6.2198	6.4663	1326.9	2837.39	0.0472665	17494	1.64038	654.99	68.5	5130275	5762	22250.6	904.91	112	167.96	265.48	222.12
Zhejiang	2014	2274	425.5	1425.37	2420.13	757.4	89.617	5.8748	6.5677	204	2844.59	0.0442381	19373.3	1.59537	771.75	41.5	5245892	6965	391480	905.34	112	217.48	233.67	230.71
Zhejiang	2015	2290.55	387.66	1432.15	2360.73	584	87.5237	5.6458	6.7458	393.2	2933.44	0.0427386	21125	1.59937	859.37	53.8	7390800	8563	340139	905.56	112	239.33	251.29	373.77
Zhejiang	2016	2274.44	351.64	1446.31	2136.69	564.8	84.4772	4.9482	6.73	456	3146.06	0.0415899	22866.1	1.57258	861.6	46.8	7224100	9029	888231	926.09	112	254.442	270.624	308.656
Zhejiang	2017	1981.11	319.22	1444.7	2072.27	580.1	82.6301	4.6303	6.7891	107.3	3093.36	0.0373573	24955.8	1.3713	950.56	15	6966927	10880	775495	976.652	113	290.055	366.399	322.662
Zhejiang	2018	1978.68	278.13	1440.8	2009.33	599.1	77.761	4.3725	6.8731	168.6	3157.25	0.035002	27302.4	1.37333	1038.65	56.7	7244617	12065	1.20149e+06	1008.31	113	330.169	372.008	421.07
Zhejiang	2019	1999.62	244.41	1405.43	1908.04	592.1	72.5007	3.8572	6.6737	353.8	3355.25	0.0336379	29875.8	1.42278	1237.85	36.1	7442421	11118	1.20215e+06	1026.73	112	362.404	404.648	439.156
Zhejiang	2020	2014.5	208	1415.7	1813.17	605.7	69.6111	3.6561	6.6892	114	3496.94	0.0335725	31930.5	1.42298	1494.13	175.4	7648900	13221	1.58892e+06	1038.14	112	382.072	439.253	429.979
Zhejiang	2021	2014.59	206	1415.7	1773.65	620.9	68.2639	3.4563	6.9687	149	3579.21	0.0300493	35247.4	1.42304	1781.19	66.7	7952656	11613	1.7934e+06	424.464	111	415.931	468.565	434.61
Zhejiang	2022	2027.16	203	1226.14	1767.56	621	67.0485	3.3	6.9	105.1	3752.31	0.0299143	37565	1.65328	2093.77	175.4	8311998	10266	2.2172e+06	575.635	111	441.519	424.117	464.148
Zhejiang	2023	2041.38	197	1240.7	1794.03	638.8	65.8141	3.1	6.7	9.81	3978	0.0282485	40311	1.64535	2454.6	22.5	910.65	4584	1.06697e+06	574.2	109	455.156	443.79	467.419
Anhui	2011	9022.94	1598.9	3547.65	5657.08	3135.5	329.671	11.7475	8.6114	1317.2	3459.66	0.131714	6811	2.54336	1383.15	72.2	3518700	1513	342399	117.276	105	20.2	55.58	34.66
Anhui	2012	8969.6	1531.2	3585.09	5902.77	3542.9	333.526	11.6741	9.1171	1152.5	3728.3	0.126582	7826	2.50192	1755.87	77.5	4304717	2554	573450	128.797	106	66.06	138.06	122.31
Anhui	2013	8945.64	1469.7	4305.53	6140.28	3279.6	338.404	11.7774	9.4882	1769.7	4009.24	0.12211	8850	2.07771	1866.21	105.2	4781716	3552	231396	138.39	107	106.51	190.86	224.45
Anhui	2014	8945.53	1415.3	4331.69	6365.83	3415.8	341.391	11.3974	9.6155	641.3	4223.73	0.11475	9916.42	2.06514	1874.99	125	5026868	3636	405906	147.53	109	156.56	173.84	272.22
Anhui	2015	8950.46	1396.2	4400.34	6580.99	4077.2	338.694	11.1048	9.7943	966.7	4390.8	0.111639	10820.7	2.03404	1951.94	140.9	5777400	3845	587163	156.75	112	171.65	189.78	381.23
Anhui	2016	8893.61	1383.5	4437.46	6867.49	3961.8	327.008	10.5704	9.6966	1341.2	4655.53	0.105202	11720.5	2.00421	2196.46	120.3	6248300	3961	621464	161.62	113	194.895	229.954	338.538
Anhui	2017	8726.68	1363.3	4504.14	6312.86	4019.7	318.724	9.9394	9.7601	399.8	4597.94	0.0955759	12758.2	1.93748	2421.22	119.1	6819092	5121	459803	171.314	113	234.702	309.547	324.476
Anhui	2018	8771.11	1353.6	4538.29	6543.81	4007.3	311.8	9.4177	9.7828	863.2	4672.71	0.0879137	13996	1.93269	2632.95	98.7	7048560	6264	500916	180.79	113	273.407	309.621	393.785
Anhui	2019	8781.96	1346.9	4580.84	6650.47	4054	298.022	8.8271	10.3735	958	5162.13	0.0785607	15416	1.91711	2707.4	78.2	7362734	6742	908539	189.145	114	301.147	341.533	406.11
Anhui	2020	8817.99	815	4608.83	6799.5	4019.2	289.897	8.3294	10.3299	1238	5680.91	0.0823327	16620.2	1.91328	3334	47.8	9242900	8325	898980	205.307	114	323.745	366.145	408.383
Anhui	2021	8886.77	779	4608.8	6924.31	4087.6	284.727	7.5993	10.2605	296	6004.31	0.0782278	18371.7	1.92822	4362	111.4	9425474	7963	751356	280.415	114	364.428	399.877	423.617
Anhui	2022	8933.59	790	4576.18	7070.12	4100.1	280.192	7.3	10.2	390.4	6277.98	0.0780042	19574.9	1.9522	6145.7	90	9918819	8359	1.51024e+06	305.922	114	389.061	368.605	452.323
Anhui	2023	9043.96	768	4679.1	7194.56	4150.8	277.993	7.1	10.1	28.75	6247.9	0.0743157	21144	1.93284	7067.3	102.9	1049.29	3532	49509.3	341.7	111	403.926	384.57	450.581
Fujian	2011	2285.8	574	967.477	1250.81	672.8	120.932	5.8276	5.7814	133.1	2730.94	0.0918123	8952	2.36264	242.67	23	2078900	1369	20339.5	270.579	642	63.28	68.51	44.5
Fujian	2012	2263.12	551	968.51	1286.8	547.3	120.866	5.7846	5.8692	159.3	3007.4	0.0901802	10164	2.3367	307.53	25.1	2441622	1721	251195	312.855	678	112.74	140.25	126.79
Fujian	2013	2292.21	511	1122.42	1336.76	664.4	120.573	5.7804	5.9154	276.8	3281.96	0.0885434	11405	2.04221	358.68	29	3122226	2440	138306	346.68	698	157.43	194.12	247.85
Fujian	2014	2305.24	493	1116.12	1368.35	667	122.614	5.6391	6.0932	102.6	3522.31	0.0837554	12650.2	2.0654	416.5	30.6	3203234	2567	360145	367.67	714	204.22	164.85	265.76
Fujian	2015	2331.32	480	1061.65	1384.13	500	123.802	5.577	6.2067	203.3	3717.87	0.0815287	13792.7	2.19593	443.95	21.8	4418600	4350	315597	381.06	722	226.6	198.23	392.01
Fujian	2016	2327.31	450	1055.37	1269.09	477.3	123.842	5.5387	6.2424	386.7	4155.68	0.0820261	14999.2	2.20521	442.09	73.9	4105800	6496	349806	384.45	742	240.466	245.125	306.701
Fujian	2017	1549.34	418	1064.84	1232.42	487.2	116.323	5.2167	6.2415	57.5	3947.16	0.0688311	16334.8	1.455	494.16	32.9	4477013	6538	996104	388.38	754	275.401	334.329	314.469
Fujian	2018	1577.31	400	1085.18	1228.27	498.6	110.738	4.9143	6.0002	78.7	4229.52	0.0664679	17821.2	1.4535	560.2	23.3	4315149	7489	20529	403.868	758	312.313	334.296	407.758
Fujian	2019	1599.29	369	1076.78	1237.73	493.9	106.263	4.5477	5.8507	123.1	4636.56	0.0612391	19568.4	1.48526	608.23	26.5	4420628	7597	337145	417.924	759	340.652	363.728	420.248
Fujian	2020	1631.27	323	1110.42	1260.2	502.3	100.806	4.3163	5.1824	65	4901.07	0.0622341	20880.3	1.46906	717.26	20.9	4500500	8976	294859	445.073	761	359.212	401.803	409.818
Fujian	2021	1651.87	301	1110.4	1270.52	506.4	96.6342	4.1689	4.6304	47	5200.97	0.0593665	23228.9	1.48764	859.41	32.2	3666140	6746	851645	311.733	759	394.011	436.06	417.379
Fujian	2022	1682.14	299	855.469	1296.71	508.7	92.0693	4	4.7	105.9	5502.56	0.0579214	24986.6	1.96634	989.55	35	4103670	5772	719272	277.446	757	420.568	408.869	442.983
Fujian	2023	1712.25	289	858.8	1323.69	511	89.1522	3.8	4.3	83.44	5729.2	0.0591978	26722	1.99377	1137.69	26	415.14	2607	1.00052e+06	341.2	756	431.525	422.022	442.224
Jiangxi	2011	5486.79	806.1	1867.67	4200.03	2052.8	140.77	9.9537	4.771	1075.3	2207.27	0.118866	7133	2.93777	490.92	53	2879900	269	62636.2	77.26	677	13.97	54.82	36.21
Jiangxi	2012	5524.91	758.8	1907.06	4599.68	2140.6	141.26	10.0413	5.0275	673.5	2399.26	0.117402	8103	2.89708	622.78	58.1	3847674	353	101447	84.616	742	59.82	132.68	123.92
Jiangxi	2013	5552.56	722.8	1995.6	2014.13	2116.1	141.577	9.9922	5.1401	1049.1	2578.35	0.113565	9089	2.7824	661.93	40.7	4385353	456	122103	90.9	796	99.81	183.73	230.78
Jiangxi	2014	5570.55	680.9	2001.57	2118.39	2143.5	142.871	9.4764	5.3122	487.1	2726.54	0.107143	10116.6	2.78309	738.48	43.4	5001512	739	129615	97.62	839	148.73	167.19	280.18
Jiangxi	2015	5579.09	645.3	2027.67	2260.82	2235.6	143.583	9.3873	5.3977	455.3	2859.1	0.106016	11139.1	2.75148	772.74	46.2	5573000	1300	68210.5	99.92	867	170.86	182.48	379.14
Jiangxi	2016	5560.67	608.7	2036.83	2201.62	2234.4	141.974	9.2188	5.2757	786.1	3130.29	0.102953	12137.7	2.73006	811.05	46.8	5809000	2020	307551	104.58	874	188.788	222.736	341.083
Jiangxi	2017	5638.46	572.3	2039.42	2309.6	2221.7	134.971	8.7737	5.3509	441.4	3069.01	0.0917341	13241.8	2.76474	1030.38	55.6	6077087	3087	529446	108.502	876	228.52	305.918	324.382
Jiangxi	2018	5555.81	527.9	2032.02	2381.97	2190.7	123.197	7.7183	5.2218	530.7	3148.57	0.0853923	14459.9	2.73414	1427.87	63.4	5994078	3653	210289	112.472	878	266.463	296.518	394
Jiangxi	2019	5521.18	489.8	2036.14	2470.66	2157.5	115.571	6.2701	5.202	1200.7	3481.29	0.0831086	15796.3	2.71159	1623.44	67.4	6198025	3727	418212	119.236	876	294.322	319.183	400.969
Jiangxi	2020	5644.37	455	2038.49	2591.05	2163.9	108.812	5.2708	5.2296	943	3820.74	0.0872503	16980.8	2.7689	2063.29	41.3	7403100	4696	628209	130.187	875	316.135	353.232	398.516
Jiangxi	2021	5672.94	424	2038.5	2695.35	2192.3	108.587	5.1629	5.2196	421	3998.09	0.0788091	18684.2	2.7829	2734.19	48	7622555	4037	701778	167.158	871	353.625	384.475	411.092
Jiangxi	2022	5730.55	403	2166.49	2838.16	2151.9	107.705	5.1	5.4	1111.9	4223.81	0.076431	19936	2.64509	3580.74	52.1	7884845	2660	491999	186.495	869	373.568	354.51	440.416
Jiangxi	2023	5797.01	391	2186.8	2953.53	2198.3	107.124	5	5.4	201.77	4198.9	0.0760991	21358	2.65091	5231.88	52.9	802.43	1062	452442	200.4	865	385.589	370.439	437.09
Shandong	2011	10865.4	2164.9	4986.88	12098.2	4426.3	473.64	16.4812	31.8317	2117.2	7409.75	0.0876033	8395	2.17881	319.14	198.4	5640000	3577	943377	456.518	166	33.67	47.16	39.01
Shandong	2012	10867	2068.1	5058.11	12419.9	4815.8	476.258	16.1955	31.8055	1822.6	7945.76	0.0856113	9506	2.14843	857.54	220.8	6738161	4418	954721	465.786	168	80.15	127.53	117.68
Shandong	2013	10976.4	1973.9	4729.03	12739.8	4528.2	472.657	15.8384	31.8727	1461.7	8749.99	0.08587	10687	2.32107	1001.95	233.5	7481384	5483	888077	471.38	169	122.01	189.07	228.32
Shandong	2014	11037.9	1878.6	4901.95	13101.4	4596.6	468.08	15.635	30.5168	886.1	9198.26	0.0807443	11882.3	2.25174	962.75	272.7	7728411	6054	1.80883e+06	480.04	172	169.89	161.19	259.08
Shandong	2015	11026.5	1795.4	4964.43	13353	5153.1	463.497	15.1004	30.1575	1379	9549.63	0.0790301	12930.4	2.22111	1773.93	295.2	9644200	7187	61346.6	482.3	174	192.11	178.15	392.16
Shandong	2016	10973.2	1706.9	5161.16	9797.61	5332.3	456.463	14.864	29.7961	552.2	9325.89	0.0724611	13954.1	2.12611	1992.26	308.6	9434400	8345	142651	488.84	177	209.796	217.811	334.577
Shandong	2017	11107.8	1622.5	5191.06	10144	5374.3	439.959	14.067	28.7098	856.9	9140.36	0.066535	15117.5	2.13979	2359.73	315.4	9535911	10066	1.61301e+06	488.453	177	247.188	290.925	319.918
Shandong	2018	11076.8	1534.5	5235.99	10415.2	5319.5	420.349	12.9882	27.6935	983.8	9397.39	0.0647383	16297	2.11551	2821.49	306.9	9984950	10940	761067	416.236	178	281.99	287.852	388.476
Shandong	2019	10933.1	1445.9	5271.37	10679.8	5357	395.344	12.0342	26.7113	1340.7	9671.67	0.0719941	17775.5	2.07405	3602.81	291.5	10759789	13330	1.532e+06	435.916	178	309.971	318.538	400.836
Shandong	2020	10889.1	1372	5293.56	10964.7	5446.8	380.88	11.4311	26.5659	382	10190.6	0.0733466	18753.2	2.05704	4461.59	286.9	10652900	19280	1.36674e+06	445.623	179	331.656	343.487	409.002
Shandong	2021	10948.6	1316	5293.6	11186.1	5500.7	371.029	10.823	25.9678	109	11468	0.0725547	20793.9	2.06827	5642.72	173.8	10269455	19508	1.42534e+06	507.755	179	367.59	381.021	423.328
Shandong	2022	10964.1	1284	5209.09	11530.5	5543.8	362.085	10.5	25.4	45.5	12130.7	0.0720374	22109.9	2.10481	6952.5	120.2	11188638	18924	4.06564e+06	463.2	178	392.525	352.004	453.032
Shandong	2023	11002.7	1267	5241.7	11988.7	5655.3	354.794	10.2	25.2	17.38	12531.9	0.0706668	23776	2.09907	7972.12	65.8	1051.73	8040	86287.1	607.9	178	407.763	373.272	452.259
Henan	2011	14258.6	2210	5150.44	10515.8	5542.5	673.71	12.8747	15.1616	1477.6	6218.64	0.130416	6989	2.76843	428.12	79.9	4804800	1232	124597	281.823	752	13.54	38.11	59.81
Henan	2012	14262.2	2136	5205.63	10872.7	5898.4	684.43	12.8289	15.5169	1388.8	6679.04	0.127352	7963	2.73976	1178.74	79.2	5517307	1402	116099	290.028	789	61.93	98.07	129.37
Henan	2013	14323.5	2044	4969.11	11150	5713.7	696.37	13.0058	16.7794	1179.9	7198.08	0.126089	8969	2.88252	1546.61	88.8	6298543	1971	339605	305.42	848	105.06	155.23	240.42
Henan	2014	14378.3	1897	5101.15	11476.8	5772.3	705.75	12.9866	16.3477	1905.2	7549.11	0.119068	9966.07	2.81864	1139.15	78.4	6619375	2572	275331	313.23	897	157.52	132.24	259.31
Henan	2015	14425	1719	5210.64	11710.1	6470.2	716.09	12.8748	16.2001	225.1	7641.27	0.113765	10852.9	2.76836	1740.67	72.5	7916300	3317	399083	321.01	941	181.5	151.05	382.73
Henan	2016	14472.3	1546	5242.92	9854.95	6498	715	12.7107	16.3149	519.3	7799.67	0.105906	11696.7	2.76035	2791.33	90.7	8070600	4223	328808	317.23	971	200.646	199.216	340.796
Henan	2017	14732.5	1375	5273.63	10038.3	6524.2	706.7	12.0713	15.7298	1247	7562.53	0.0929075	12719.2	2.79362	3441.36	101.8	9168095	5578	540771	328.817	994	241.449	279.56	328.092
Henan	2018	14783.4	1303	5288.69	10204.5	6648.9	692.793	11.3603	15.2838	1167.7	7757.94	0.0892582	13830.7	2.79528	4567.25	113.9	10010834	6841	667952	330.59	997	278.456	275.745	389.265
Henan	2019	14714	1251	5328.95	10357	6695.4	666.721	10.7231	15.0762	969.8	8541.77	0.0854307	15163.7	2.76114	4822.64	83.4	10597034	6857	701367	353.825	1001	309.343	301.852	401.162
Henan	2020	14688	1223	5463.07	10463.7	6825.8	647.983	10.24	15.1717	670	9956.35	0.0973459	16107.9	2.6886	5587.18	114.3	11454000	8769	362844	373.174	1000	331.165	321.21	408.316
Henan	2021	14705.1	1172	5463.1	10650.2	6544.2	624.66	9.7432	14.0352	1588	10501.2	0.09545	17533.3	2.69172	6336.38	106.2	10152155	7395	1.58316e+06	451.431	999	366.972	362.199	420.965
Henan	2022	14711.5	1320	5623.22	10858.7	6789.4	595.31	9.2	14	683.4	10952.2	0.0948372	18697.3	2.61621	7902.91	82.2	11104837	6626	2.4667e+06	505.527	997	392.906	328.173	446.238
Henan	2023	14747.1	1224	5666.7	11118.4	6624.3	583.964	9	13.9	1987.57	10304.6	0.0906457	20053	2.60242	9867.4	84.7	1059.78	2837	795992	568.8	995	405.351	356.072	442.707
Hubei	2011	8009.57	1547.86	2455.69	3571.23	2388.5	354.89	13.9524	6.5044	2580	4252.9	0.130871	7540	3.26164	535.59	8.1	3762300	1054	372306	112.26	102	35.17	53.56	30.18
Hubei	2012	8078.89	1510.44	2548.91	3842.16	2485.1	354.89	13.9524	6.5044	1718.7	4732.12	0.128032	8582	3.16955	647.09	90.3	4190224	1351	577111	112.26	108	82.06	125.84	121
Hubei	2013	8106.19	1458.59	2791.41	4081.05	2501.3	351.934	12.7152	6.631	2487.9	5160.56	0.124967	9692	2.90398	689.04	83.8	4653424	1676	637133	130.14	114	123.74	197.04	241.51
Hubei	2014	8112.26	1374.29	2855.32	4292.9	2584.2	348.27	12.6099	6.9186	1058.8	5452.84	0.116033	10849.1	2.8411	667.46	76.2	4837970	2044	478270	142.23	116	176.61	175.7	261.07
Hubei	2015	7952.36	1304.21	2899.15	4468.12	2914.8	333.872	12.0685	7.1321	1115.6	5728.56	0.112007	11843.9	2.743	646.32	103.9	6165700	2433	446711	149.1	120	199.53	189.08	385.07
Hubei	2016	7843.51	1246.66	2905.57	4187.75	2796.4	327.96	11.7401	6.7306	2741.2	6278.35	0.112025	12725	2.69947	558.89	71.3	7045900	2981	691546	152.86	119	215.55	233.412	331.833
Hubei	2017	7956.14	1196.22	2919.17	4335.09	2846.1	317.93	10.9588	6.5876	1437.1	6129.72	0.0994687	13812.1	2.72548	923.14	47.5	7147326	4055	636369	156.569	120	253.629	317.581	331.095
Hubei	2018	7952.9	1147.05	2931.9	4424.61	2839.5	295.819	10.3317	6.3554	1076.1	6207.83	0.0901148	14977.8	2.71254	1188.64	65.7	7855536	4242	598283	165.214	121	292.558	322.443	402.991
Hubei	2019	7815.89	1107.24	2968.99	4515.73	2725	273.89	9.7024	5.8801	1429.8	6681.85	0.0831165	16390.9	2.63251	1648.08	137.7	8282095	5638	1.366e+06	178.553	122	320.788	348.533	414.891
Hubei	2020	7974.39	897	3086.04	4626.07	2727.4	267.324	9.3143	5.8039	1632	7303.64	0.0951101	16305.9	2.58402	2204.39	109.9	8689000	6927	50829.7	186.874	122	336.541	369.58	411.729
Hubei	2021	8109.24	881	3086	4731.46	2764.3	262.623	9.0468	5.7268	506	8296.44	0.0932099	18259	2.62775	3005.73	56.1	8416517	6941	142856	203.56	120	374.321	408.737	419.384
Hubei	2022	8191.92	928	3208.84	4878.65	2741.1	257.98	8.5	5.7	1174.6	8939.33	0.0928019	19709.5	2.55293	3963.94	134	9248363	7769	1.36647e+06	232.388	119	395.144	381.059	443.198
Hubei	2023	8309.25	874	3220.2	4975.49	2777	254.385	8.3	5.5	359.2	9106.9	0.0909153	21293	2.58035	4943.08	49.4	953.45	3445	846794	277.2	118	407.275	401.346	442.888
Hunan	2011	8401.97	1679.94	2762.41	4935.59	2939.4	242.489	12.0431	7.3729	2374.8	4508.2	0.140727	7082	3.04154	1358.67	66.2	3942600	938	210650	106.03	693	15.33	60.73	39.02
Hunan	2012	8511.87	1668.99	2715.78	5189.24	3061.9	249.11	12.298	7.9536	1233.9	4904.1	0.135604	8024	3.13423	1593.76	70.9	4477359	1221	281002	110.229	803	63.39	132.38	123.56
Hunan	2013	8650.02	1656.01	3084.3	5433.99	2925.7	248.193	12.4298	8.2407	3047.2	5043.58	0.125874	9029	2.80453	1746.68	75.2	5165537	1553	331637	118.58	916	103.46	175	244.25
Hunan	2014	8764.47	1651.37	3101.7	5672.1	3001.3	247.8	12.4277	8.2946	1136.1	5304.82	0.116459	10060.2	2.8257	2016.12	80.7	5575869	1847	638599	123.83	1055	150.42	153.46	247.99
Hunan	2015	8716.99	1618.71	3113.32	5894.06	3094.2	246.536	12.2353	8.3989	765.1	5630.75	0.115272	10992.5	2.7999	2369.49	100	6762400	2101	16031.6	123.91	1184	170.07	174.47	384.24
Hunan	2016	8793.28	1587.32	3132.37	6097.54	3052.3	246.443	11.8661	8.4679	1375.5	6081.92	0.113414	11930.4	2.80723	2641.56	98.2	7297500	2241	247008	126.7	1316	186.133	219.802	318.074
Hunan	2017	8321.98	1515.16	3145.87	6254.83	3073.6	245.258	11.6023	8.5209	1217.7	5213.48	0.0884407	12935.8	2.64537	3141.86	83.3	7824215	3017	236452	128.557	1406	223.473	297.699	318.964
Hunan	2018	8111.09	1462.38	3164	6338.57	3022.9	242.614	11.4155	8.5397	625.6	5361.62	0.0846541	14092.5	2.56355	3465	89.6	9255717	3886	692513	130.821	1468	258.069	286.552	382.193
Hunan	2019	8122.8	1409.24	3176.11	6471.82	2974.8	229.008	10.5548	8.3792	997.8	6405.06	0.0917423	15394.8	2.55747	4018.53	73.1	9786759	4289	645680	132.978	1498	282.28	311.812	403.463
Hunan	2020	8400.13	836	3192.9	6588.95	3015.1	223.733	10.145	8.3005	817	7511.96	0.101491	16584.6	2.63087	4499.45	78.3	9877100	5837	925240	134.686	1508	302.281	347.444	402.302
Hunan	2021	8504.26	801	3192.9	6676.4	3074.4	219.063	9.1114	7.9094	436	7662.36	0.0938474	18295.2	2.66349	5291.84	95.9	9490110	4900	745559	331.228	1510	338.787	377.362	412.988
Hunan	2022	8591.54	785	2876	6755.95	3018	215.874	8.2	7.4	1129.7	8160.13	0.0945688	19546.3	2.98732	6021.96	101.4	9954435	4316	1.24466e+06	332.519	1512	362.191	353.4	437.899
Hunan	2023	8714.95	773	2917.6	6839.51	3068	213.338	7.5	6.6	276.01	8199.4	0.0924022	20921	2.98703	7589.77	91.2	1068.21	1605	1.43833e+06	317.3	1509	372.798	367.028	435.075
Guangdong	2011	4572.03	1402.33	1873.16	2414.82	1361	241.3	11.4082	4.4035	501.7	4384.44	0.0500881	8889	2.44081	191.55	88.5	4203400	3022	1.18573e+06	1134.92	114	63.41	80.97	68.66
Guangdong	2012	4629.6	1376.77	1874.44	2496.68	1295.7	245.376	11.3878	4.443	417.2	4656.85	0.0498925	9999	2.46986	441.1	116	5395580	3450	564814	1187.5	115	111.37	149.38	138.31
Guangdong	2013	4698.08	864	1770.76	2564.89	1315.9	243.906	11.009	4.5781	1134.5	4946.81	0.0487798	11068	2.65315	657.39	105.6	5952799	4427	2.20391e+06	1234.84	117	153.33	208.44	245.61
Guangdong	2014	4744.95	933	1770.99	2632.37	1357.3	249.583	11.2664	4.6206	842.4	5234.21	0.0467015	12245.6	2.67926	847.65	26.6	5575889	5105	3.75635e+06	1314	118	199.63	175.04	255.98
Guangdong	2015	4784.72	987	1771.26	2696.79	1211.7	256.457	11.3782	4.6795	846.3	5520.03	0.0459473	13360.4	2.70131	910.45	24.8	8119000	6349	1.32095e+06	1326.2	118	225.52	195.87	373.79
Guangdong	2016	4830.83	1046	1771.71	2390.5	1204.2	261.016	11.3652	4.5505	630.7	6078.43	0.0456914	14512.2	2.72665	1084.8	21.5	7154400	9286	2.42807e+06	1334.78	119	240.073	236.499	295.065
Guangdong	2017	4227.51	1112	1774.61	2410.77	1208.6	258.304	11.2958	4.5867	282.6	5969.87	0.040259	15779.7	2.38222	1296.78	50.6	7544006	12642	3.67401e+06	1414.77	120	275.913	328.166	304.92
Guangdong	2018	4279.36	1172	1775.21	2429.94	1193.5	231.32	9.3684	4.4814	547.8	6318.12	0.0393866	17167.7	2.41063	1550.08	16	9097841	13624	4.0147e+06	1443.1	120	312.442	329.93	399.859
Guangdong	2019	4357.38	1243	1773.4	2455.79	1240.8	225.789	8.7489	4.3842	144.7	7175.89	0.0404125	18818.4	2.45708	1883.22	25.3	9576808	15943	3.11568e+06	1448.04	119	339.984	364.498	421.661
Guangdong	2020	4451.81	1340	1776.46	2495.43	1267.6	219.798	8.3217	4.2558	84	7901.92	0.0430656	20143.4	2.50601	2676.87	33.8	11258100	21902	3.03841e+06	1467.46	120	356.941	404.353	409.062
Guangdong	2021	4498.36	753	1776.5	2524.48	1279.9	212.871	7.744	4.3027	76	8305.84	0.0402325	22306	2.53215	4840.52	65.6	11094706	18465	5.46597e+06	690.402	122	386.371	438.127	415.707
Guangdong	2022	4553.47	722	1560.23	2556.3	1291.5	208.743	7.6	4.5	194.4	8892.29	0.0413604	23597.8	2.91846	8200.65	25	10675665	16434	3.79347e+06	564.512	123	413.306	405.569	446.072
Guangdong	2023	4587.27	688	1560.2	2586.04	1285.2	206.793	7.4	4.4	217.45	9202.1	0.0408386	25142	2.94018	10137.4	14	1076.77	5507	3.66192e+06	764.2	121	423.772	418.986	449.04
Guangxi	2011	5996.48	1565	1529.24	3033.15	1429.9	242.71	6.6229	3.7403	1437.9	3323.37	0.174665	6003	3.92121	83.14	82.6	3148600	491	138450	56.1794	213	19.98	44.06	61.33
Guangxi	2012	6082.61	1481	1541.29	3195.91	1426.3	249.04	6.7784	3.9699	575	3490.72	0.166655	6894	3.94644	129.62	95.5	3690650	966	5918.83	63.314	223	66.47	104.58	137.25
Guangxi	2013	6137.16	1478	1586.37	3382.98	1521.8	255.701	6.9037	4.1479	694.4	3755.19	0.162186	7793	3.86868	276.4	101	3718964	1622	13596.1	68.38	232	106.97	153.84	232.82
Guangxi	2014	5929.94	1450	1600	3567.49	1534.4	258.676	7.1999	4.4087	1212.7	3947.73	0.153988	8683.18	3.70621	497.48	110.7	3912868	1706	129130	76.21	240	154.29	139.98	252.66
Guangxi	2015	6134.7	1297	1618.79	3803.18	1433.2	259.857	7.4916	4.6276	545.7	4197.12	0.152677	9466.58	3.78969	634.13	112.8	4975300	1929	64971.9	83.91	249	176.33	153.46	406.94
Guangxi	2016	6145.31	1207	1646.07	3527.26	1419	262.142	8.5694	4.8445	301	4591.37	0.152683	10359.5	3.73332	888.22	116.2	5734800	1562	106805	95.37	252	193.514	202.207	360.146
Guangxi	2017	5969.88	1110	1669.87	3658.33	1370.5	263.831	7.2495	4.7693	196	4698.71	0.155388	11325.5	3.57505	1253.07	125.7	6468687	1913	118232	103.531	253	232.734	279.516	326.443
Guangxi	2018	5972.38	1024	1706.88	3750.82	1372.8	255.046	6.9714	4.7195	150	4909.24	0.148354	12434.8	3.499	1688.45	128.6	6565799	2174	164420	108.249	255	270.406	272.494	381.929
Guangxi	2019	5989.2	951	1713.08	3840.04	1332	252.035	6.8144	4.7577	247.8	5498.81	0.15952	13675.7	3.49615	1923.54	156.1	7472063	2663	291801	126.469	255	295.256	292.478	390.011
Guangxi	2020	6107.32	866	1731.03	3901.4	1370	247.85	6.6026	4.8712	279	5913.28	0.160485	14814.9	3.52814	2516.05	145.3	9043800	3734	7572.27	141.299	255	311.985	313.241	390.407
Guangxi	2021	6177.52	842	1731	3886.35	1386.5	251.893	6.4233	4.5404	152	6524.39	0.162302	16362.9	3.56876	3665.82	181.6	7578036	3750	113390	236.833	254	342.81	351.839	401.713
Guangxi	2022	6271.4	857	1549.35	3825.26	1393.1	249.204	6.2	4.6	376	6938.53	0.162344	17432.7	4.04775	4739.84	184.7	7370679	3540	93142.6	211.993	254	363.786	323.47	426.286
Guangxi	2023	6352.35	829	1695.6	3850.93	1395.4	247.571	6	4.4	219.8	7229.3	0.164258	18656	3.74637	6014.63	143.1	729.94	1210	254700	270.6	254	371.175	339.584	421.029
Hainan	2011	838.348	227.91	247.51	444.33	188	47.73	4.6854	1.9387	516.6	1002.35	0.261323	6801	3.38713	96.79	12.6	1056300	188	8455.91	7.0733	222	30.96	57.74	71.63
Hainan	2012	854.642	218.15	256.75	479.66	178.1	45.53	3.9637	2.1394	60.5	1082.15	0.249179	7816	3.32869	163.04	10.8	1236240	255	14550	8.5876	237	79.51	120.72	147.98
Hainan	2013	848.216	199.41	260.928	502.1	190.9	47.57	4.3478	2.3333	164.7	1144.94	0.238066	8802	3.25077	299.04	5.1	1390310	355	11724.7	9.63	248	121.75	173.37	251.39
Hainan	2014	859.615	195.59	259.924	517.31	186.6	49.46	3.99	2.81	309.4	1252.18	0.231244	9912.57	3.30718	322.08	4.7	1463014	417	19243.5	10.89	269	170.99	153.8	255.03
Hainan	2015	845.277	189.95	263.994	511.59	154.5	51.14	3.98	3.2433	41.2	1323.91	0.230833	10857.6	3.20188	360.33	6.9	1642400	497	19006	13.02	290	192.26	184.91	438.59
Hainan	2016	823.26	187.45	289.95	516.569	146.1	50.6227	3.4028	2.6704	509.3	1470.41	0.233976	11842.9	2.83932	371.18	16.1	1790400	474	25025	13.89	330	210.091	220.348	322.835
Hainan	2017	709.441	183.53	289.25	569.8	138.1	51.3601	3.3408	2.7642	10.8	1488.86	0.215761	12901.8	2.45269	462.31	7.4	1984157	663	10618.4	15.5189	375	253.391	297.535	309.335
Hainan	2018	712.938	177.09	290.482	565.82	147.1	48.37	2.325	2.5539	32.4	1535.73	0.206974	13988.9	2.45433	840.36	13.2	2277110	779	41027.8	17.4095	398	294.403	300.233	377.541
Hainan	2019	676.235	175.15	290.627	581.232	145	46.2644	2.1358	3.055	3.6	1689.4	0.203499	15113.1	2.32681	976.67	16	2513993	1232	69041.3	18.684	407	319.414	314.457	385.585
Hainan	2020	676.864	170.79	292.207	615.567	145.5	42.6091	1.9747	3.058	40	1821.02	0.205333	16278.8	2.31639	1159.33	12.4	2685700	2030	26801.4	20.9562	416	335.866	337.243	383.458
Hainan	2021	684.777	169	292.2	630.752	146	40.7673	1.8729	3.4246	32	2014.79	0.193724	18076.3	2.34352	1458.21	3.1	2607179	2213	57489.7	62.653	416	368.476	377.119	394.881
Hainan	2022	687.183	173	330.172	631.796	146.6	38.6434	1.8	3.5	3.5	2272.04	0.207943	19117.4	2.08129	1709.19	6.5	2656480	1739	106795	46.1344	414	392.597	344.976	416.038
Hainan	2023	702.364	168	334.5	633.09	147	37.468	1.7	3.7	1.04	2410.3	0.199624	20708	2.09974	1878.83	7.9	271.84	894	135549	76.2	412	399.009	361.374	417.335
Chongqing	2011	3413.09	568.95	692.88	1140.3	1126.9	95.58	2.0324	3.9332	816	1265.33	0.0843561	6605	4.92594	154.33	49.6	1989100	822	122605	70.3706	437	40.38	47.46	36.77
Chongqing	2012	3477.69	531.18	702.97	1162	1060.5	96.02	1.948	4.0928	405.4	1402.03	0.0823876	7526	4.94714	190.04	56.4	2563490	1060	141660	73.8	474	85.39	116.14	119.05
Chongqing	2013	3515.89	495.08	675.183	1198.88	1148.1	96.6435	1.8354	4.286	455.3	1513.74	0.0795368	8493	5.20732	264.73	20.4	2819412	1317	247983	76.12	515	125.27	178.2	240.74
Chongqing	2014	3540.35	463.78	677.263	1243.34	1144.5	97.26	1.8437	4.3824	280.9	1594.96	0.0743925	9489.82	5.22744	229.03	21.2	2916154	2109	174482	78.31	566	175.57	157.88	263.63
Chongqing	2015	3575.8	440.3	687.193	1299.73	1051	97.72	1.8199	4.5162	70.8	1738.15	0.0731775	10504.7	5.20349	304.29	19.7	3313300	4151	201688	78.14	584	197.46	171.58	393.65
Chongqing	2016	3600.74	419.19	690.6	1318.67	1078.2	96.1606	1.7604	4.5265	190.4	1968.28	0.0734609	11548.8	5.21392	314.15	18.9	3479900	2496	505241	78.69	593	214.028	211.536	340.099
Chongqing	2017	3339.56	402.91	694.26	1352.6	1079.9	95.4649	1.7467	4.5479	125.9	1902.47	0.0656941	12637.9	4.81024	410.77	18	3475669	3354	27177.9	80.1802	592	249.504	301.206	319.574
Chongqing	2018	3348.49	390.62	696.94	1428.12	1079.3	93.17	1.7191	4.4625	70.9	2052.41	0.0676844	13781.2	4.80456	618	20.6	3667749	3430	52140.4	79.5272	596	285.109	285.596	384.739
Chongqing	2019	3345.74	381.48	697.68	1464.67	1075.2	91.08	1.6542	4.2559	78.3	2337.81	0.0657221	15133.3	4.79553	620.03	24.5	3895268	3112	550226	80.9037	595	311.031	310.364	400.622
Chongqing	2020	3372.54	378	698.32	1497.99	1081.4	89.8287	1.6205	4.1694	159	2749.05	0.0721252	16361.4	4.82951	696.73	21.4	4167600	4189	325654	82.5063	594	329.386	343.906	397.125
Chongqing	2021	3409.26	366	698.3	1532.45	1092.8	89.0531	1.6038	4.1159	60	2935.65	0.0689037	18099.6	4.88222	915.06	22.4	4062587	3116	553153	85.5708	593	362.235	373.57	408.899
Chongqing	2022	3479.02	389	669.868	1565.6	1072.8	88.7413	1.6	4.1	369.5	3068.45	0.0690755	19312.7	5.1936	1234.45	20.4	3938467	2575	548269	88.3559	592	386.299	346.287	434.105
Chongqing	2023	3506.19	361	681.1	1586.37	1095.9	88.44	1.6	4	98.03	3154.3	0.0688222	20820	5.14784	1486.64	19.2	415.66	1182	824402	90.5	590	400.09	365.566	431.706
Sichuan	2011	9565.55	1972	2600.75	3426.1	3291.6	251.231	6.191	12.2227	1528.2	4932.73	0.141892	6505	3.678	1762.59	156	5457000	1326	510662	148.567	116	29.02	58.56	43.5
Sichuan	2012	9657.01	1905	2662.65	3694.03	3271.3	253.03	6.0317	12.6827	943.9	5433.12	0.138116	7432	3.62684	2317.78	139.1	6549482	1920	18498.9	155.961	118	74.36	126.5	137.31
Sichuan	2013	9682.19	1854	2616.54	3953.09	3387.1	251.143	5.9954	12.7854	1602.9	5620.27	0.129797	8381	3.70038	2733.93	84.6	7417837	2308	223331	163.51	118	114.03	176.71	238.82
Sichuan	2014	9668.61	1804	2666.32	4160.12	3374.9	250.188	5.9385	13.0263	919.3	5888.09	0.123737	9347.74	3.6262	2768.19	65.9	8265910	2329	198775	169.57	122	162.58	159.82	236.39
Sichuan	2015	9689.93	1758.4	2735.09	4404.55	3394.6	249.827	5.8912	13.217	562.7	6377.84	0.12236	10247.4	3.54283	2948.67	98.3	9266500	2992	577049	174.81	124	182.08	176.54	396.51
Sichuan	2016	9728.61	1709	2813.55	4267.33	3469.9	248.984	5.8038	13.2384	410.6	6831.08	0.119307	11203.1	3.45777	3124.93	99.9	9887100	4165	470219	183.08	125	196.999	216.544	335.376
Sichuan	2017	9575.05	1661.5	2873.1	4420.3	3488.9	241.951	5.5751	13.0993	215.7	6955.55	0.11526	12226.9	3.33265	3547.68	141.1	10231290	5882	683415	188.441	125	231.867	301.535	325.143
Sichuan	2018	9615.32	1618	2932.54	4603.88	3493.7	235.207	5.1276	12.0186	484	7195.65	0.108822	13331.4	3.27883	3770.32	150.6	13108851	5329	595151	198.618	127	266.148	295.834	384.514
Sichuan	2019	9692.98	1579.5	2954.09	4682.3	3498.5	222.772	4.629	12.3235	323.8	7889.35	0.103125	14670.1	3.2812	2695.68	133.2	12884232	5384	1.03702e+06	205.798	127	291.216	319.533	398.229
Sichuan	2020	9849.89	1542	2992.24	4754	3527.4	210.815	4.213	11.8818	633	9216.4	0.114336	15929.1	3.29181	3351.81	169.6	13393600	7245	1.22448e+06	205.906	127	310.763	344.862	396.046
Sichuan	2021	9999.92	1506	2992.2	4833.88	3582.1	207.159	4.0974	11.6968	266	9383.32	0.105141	17575.3	3.342	4579.75	174.1	13300961	6895	1.41442e+06	273.154	125	342.964	375.6	410.001
Sichuan	2022	10227.4	1602	2975.74	4923.33	3510.5	204.37	4	11.5	615.9	9859.75	0.105098	18672.4	3.43691	5637.36	161.6	13593218	6245	567429	293.651	125	363.226	352.639	433.796
Sichuan	2023	10264.4	1535	2994.2	5027.19	3593.8	202.159	4	11.2	227.95	9977.8	0.10072	19978	3.4281	6503.85	174.1	1455.2	2920	2.09086e+06	328.3	125	375.673	370.482	436.775
Guizhou	2011	5021.22	1194.39	1201.19	1851.4	876.9	94.0838	1.4469	4.0857	2570.2	1165.46	0.127366	4499	4.1802	21.19	34	2784700	277	83962.1	47.9919	238	3.06	27.51	52.92
Guizhou	2012	5182.86	1189.04	1214.57	2106.65	1161.7	98.1726	1.445	4.4062	542.1	1436.61	0.130164	5159	4.26724	68.76	35	3618731	412	31041.1	54.4597	284	49.87	89.92	136.21
Guizhou	2013	5390.11	1179.76	926.904	2240.8	1030	97.4153	1.348	4.7495	1522.4	1663.02	0.12725	5898	5.81518	161.93	40.3	4003100	755	58385.5	61.89	332	89.59	125.46	217.93
Guizhou	2014	5516.46	1171.02	981.834	2458.4	1138.5	101.295	1.3425	4.8949	626.7	2118.48	0.138182	6671.22	5.61852	439.8	36.5	4471856	1139	76662.8	71.27	383	139.9	114.08	276.9
Guizhou	2015	5542.17	1161.54	1065.43	2575.15	1210.6	103.688	1.3722	4.9403	224.4	2738.67	0.15621	7386.87	5.2018	518.94	28.5	5342600	1420	96780.6	80.12	438	160.98	132.74	410.01
Guizhou	2016	5596.81	1136.87	1088.07	2041.06	1264.3	103.671	1.3677	5.1053	330.7	3097.19	0.156766	8090.28	5.14379	646.17	45.4	6293800	1880	73047.3	85.25	500	180.704	182.696	353.029
Guizhou	2017	5659.37	828.02	1114.12	2181.43	1242.4	95.6546	1.3399	5.1138	267.3	3413.86	0.150085	8869.1	5.07968	829.67	31.7	6120492	2157	84821.5	95.1058	570	227.771	258.442	316.99
Guizhou	2018	5477.16	764.96	1132.24	2376.65	1059.7	89.4783	1.1122	5.5031	291.7	3619.52	0.145851	9716.1	4.83744	1189.82	30.2	6648442	2289	160229	98.4075	635	267.389	241.335	373.01
Guizhou	2019	5481.56	700.45	1153.99	2484.6	1051.2	83.184	0.921	4.4121	141	3888.99	0.135996	10756.3	4.7501	1363.53	28.8	9989007	2163	135638	104.935	668	292.656	245.662	383.304
Guizhou	2020	5475.35	634	1165.49	2582.36	1057.6	78.7795	0.8423	4.5411	233	4358.62	0.142477	11642.3	4.69789	1669.78	52.4	10243100	2545	127500	117.133	694	313.245	258.2	380.808
Guizhou	2021	5422.88	618	1165.5	2705.41	1094.9	75.9783	0.7048	4.4224	144	4691.97	0.139428	12856.1	4.65283	1829.34	62.5	7307379	1959	299228	167.953	731	345.734	302.402	394.289
Guizhou	2022	5359.45	693	1185.17	2805.71	1114.6	75.4073	0.7	3.9	420.4	4908.67	0.141892	13706.7	4.52209	2048.76	44.1	6921467	1601	16291.8	164.226	747	365.723	271.307	408.561
Guizhou	2023	5344.29	649	1229.9	2868.99	1119.7	74.7358	0.7	3.8	242.74	4953.6	0.138395	14817	4.3453	2476.69	35.1	775.88	645	27582.1	186.5	743	379.222	300.496	401.722
Yunnan	2011	6667.47	1689.34	1634.24	2628.39	1673.6	200.47	4.8157	9.1229	1989.3	2306.49	0.158663	5170	4.07986	605.48	58	4098000	592	69016.2	66.7808	125	7.47	48.39	39.81
Yunnan	2012	6920.41	1610	1677.9	2874.45	1687.3	210.209	5.5326	10.128	1578.3	2680.22	0.160488	5930	4.12445	712.87	62.6	5186048	826	42007.2	73.7805	134	52.78	111.96	138.91
Yunnan	2013	7148.16	1559.25	1660.27	3070.33	1824	219.015	5.4782	10.6606	1231.1	3056.04	0.160183	6724	4.30542	1030.53	87.4	5389746	1187	75483.8	82.37	148	95.59	153.55	249.15
Yunnan	2014	7194.43	1515.27	1708.97	3215.03	1860.7	226.86	5.7225	11.0993	882	3263.35	0.155297	7456.13	4.20981	1106.38	72.2	5944511	1532	73308.8	87.12	170	147.22	144.3	255.54
Yunnan	2015	7185.63	1478.41	1757.71	3333.04	1791.3	231.869	5.8648	11.3104	1028.3	3383.09	0.150948	8242.08	4.08806	1195.08	72.3	6415200	2161	126515	91.45	183	167.96	158.79	403.67
Yunnan	2016	7164.46	1474.04	1809.39	3440.64	1815.1	235.583	5.8601	11.5926	868.5	3633.12	0.148434	9019.81	3.9596	1172.5	76.9	7129200	3106	231155	95.26	199	185.374	203.167	348.645
Yunnan	2017	6790.8	1380.11	1851.42	3534.53	1843.4	231.94	5.7675	12.015	406.6	3872.93	0.14279	9862.17	3.66789	1174.05	59	6748159	4371	9347.84	102.336	213	223.536	282.855	316.085
Yunnan	2018	6890.77	1295.3	1898.07	2693.51	1860.5	217.372	5.2591	11.9685	274.8	4108.88	0.139749	10767.9	3.6304	1188.01	97.4	8422000	4201	114287	104.941	218	262.285	278.836	376.06
Yunnan	2019	6938.85	1260.51	1922.49	2714.4	1870	204.027	4.7441	12.2139	1568.9	4935.73	0.130798	11902.4	3.6093	1645.99	74.7	11171996	3792	104008	120.418	218	284.43	291.121	388.744
Yunnan	2020	6989.67	1226	1978.07	2786.75	1895.9	196.652	4.4846	12.1558	1225	5920.52	0.146763	12841.9	3.53358	1767.24	166.9	11001300	5138	300373	123.989	218	302.461	309.453	387.785
Yunnan	2021	7057.24	1187	1978.1	2838.89	1930.3	187.328	4.1104	11.7326	519	6351.82	0.142566	14197.3	3.56769	1932.46	226.1	9197358	4822	249638	173.754	218	335.343	342.002	394.171
Yunnan	2022	7130.63	1225	2035.26	2913.65	1958	183.384	4.1	11.3	810.6	6635.8	0.138571	15146.9	3.50354	1989.56	179	8884251	4829	356056	165.743	218	358.958	313.56	415.459
Yunnan	2023	7218.08	1184	2036	3013.99	1974	179.336	3.9	11.2	672.46	6834.5	0.140121	16361	3.54523	2194.39	188.4	903.93	2367	297743	204.8	218	371.876	333.511	410.802
Shaanxi	2011	4181.04	822.17	1274.34	2182.85	1194.7	207.27	1.241	3.7912	762.5	2058.6	0.097576	5484	3.28093	159.5	48.8	3337900	645	243931	131.325	519	37.81	29.74	71.74
Shaanxi	2012	4238.31	835	1277.18	2350.17	1255.9	239.805	1.2952	3.9077	508.9	2303.2	0.0947966	6285	3.31849	309.38	48.9	3764492	1009	248454	142.487	572	83.62	98.61	145.88
Shaanxi	2013	4269.02	809	1209.94	2452.72	1215.8	241.734	1.2998	4.0847	813.4	2562.51	0.0941689	7092	3.52828	539.47	42	4196218	1095	595996	113.01	628	123.6	145.94	234.55
Shaanxi	2014	4262.14	791	1226.49	2552.13	1197.8	230.189	1.2793	4.1479	772.2	2741.82	0.088465	7932.21	3.47507	567.66	63.2	4459710	1214	30811.6	109.02	685	173.25	139	269
Shaanxi	2015	4284.48	795	1236.77	2667.27	1204.7	231.946	1.3092	4.3068	744.3	2813.5	0.0886496	8688.91	3.46425	540.45	34	5205800	1142	52325.9	110.24	731	194.92	157.95	391.85
Shaanxi	2016	4276.92	803	1251.39	2171.9	1264	233.054	1.319	4.3717	632.9	2985.76	0.0873137	9396.45	3.41774	648.24	29.2	5433000	1519	503097	118.68	758	211.174	202.873	337.596
Shaanxi	2017	4063.88	805	1263.09	2242.51	1194.2	232.149	1.3335	4.3954	651.1	3077.62	0.0795226	10264.5	3.21741	748.41	54.2	5454020	1852	265736	130.846	767	246.482	276	317.467
Shaanxi	2018	4091.01	804	1274.99	2311.79	1226	229.643	1.255	4.4147	382.4	3239.99	0.0748902	11212.8	3.20866	1113.05	79.9	6267851	1891	485658	133.605	771	281.052	277.149	379.311
Shaanxi	2019	4132.09	803	1285.16	2331.49	1231.1	202.519	1.224	4.478	645.1	3536.8	0.0771883	12325.7	3.21524	1418.97	164.5	6841766	2524	507211	137.822	770	308.211	309.144	396.364
Shaanxi	2020	4160.85	632	1336.81	2387.96	1274.8	201.906	1.1951	4.4724	532	4056.61	0.0866073	13316.5	3.11253	1796.9	165.3	7422500	3578	747888	126.762	770	329.532	331.73	402.11
Shaanxi	2021	4189.27	611	1336.8	2431.21	1270.4	200.701	1.1643	4.4294	973	4313.44	0.0808497	14744.8	3.1338	2193.34	149.1	6942569	3389	1.08159e+06	154.29	769	364.117	371.218	412.672
Shaanxi	2022	4212.23	649	1161.63	2473.88	1297.9	194.162	1.1	4.6	553.3	4601.93	0.0785806	15704.3	3.62614	2576.47	145	7332112	3631	48731.5	156.922	768	384.933	342.775	439.291
Shaanxi	2023	4239.94	619	1181.2	2520.78	1323.7	193.673	1.1	5	517.8	4724.9	0.0784287	16992	3.58952	3033.26	155.6	754.49	1519	534984	182.1	768	399.436	372.4	440.17
Gansu	2011	4094.76	844.776	1291.82	2136.48	1014.6	87.24	6.8413	14.3989	1266.6	1187.76	0.135199	4278	3.16975	165.8	14.7	2376600	446	23347.7	45.0541	514	4.99	12.76	75.61
Gansu	2012	4099.84	820.915	1297.58	2279.08	1096	92.13	7.3748	15.0374	1016.5	1358.16	0.138137	4931	3.1596	378.29	18.7	3023726	522	76551.8	47.8499	567	54.72	68.98	160.79
Gansu	2013	4155.94	801.208	1284.08	2418.46	1138.9	94.71	7.776	16.5791	1282.9	1517.74	0.138906	5589	3.2365	573.01	20.4	3465804	788	60348	50.36	622	96.77	114.2	258.6
Gansu	2014	4197.51	782.166	1297.06	2545.71	1158.7	97.6	7.7832	17.6169	1618.4	1618.8	0.131751	6276.59	3.23617	676.49	21.3	3661710	1004	90251.8	51.26	684	148.1	107.29	293.6
Gansu	2015	4229.33	768.032	1306.72	2684.95	1154.6	97.92	7.8848	18.3735	1011.2	1722.09	0.140507	6936.21	3.2366	769.24	22.6	4970500	1189	70817.9	54.04	747	169.67	125.25	434.64
Gansu	2016	4253.84	750.419	1317.51	1903.9	1117.5	93.42	6.9915	19.5092	1343.3	1778	0.136575	7456.85	3.2287	844.21	23.7	4881000	1451	110777	54.22	789	189.285	172.656	310.238
Gansu	2017	3752.03	733.481	1331.43	2018.59	1105.9	84.49	5.1995	17.2188	773.1	1559.64	0.11525	8076.06	2.81805	925.33	24.5	5207919	2495	113189	55.8547	825	227.384	240.385	304.1
Gansu	2018	3773.55	720.643	1337.54	2102.8	1151.4	83.17	4.2864	16.1272	764.2	1659.36	0.111726	8804.13	2.82126	1152.97	20.6	6783521	2924	131609	59.075	863	261.29	227.515	356.539
Gansu	2019	3831.57	706.49	1328.86	2174.01	1162.6	80.88	4.1938	15.2253	173.6	1887.58	0.120491	9628.94	2.88337	1669.55	30.8	7167584	3178	55003.8	61.694	872	287.311	251.742	363.157
Gansu	2020	3931.82	597	1338.6	2289.53	1202.2	80.3566	4.0312	15.2956	396	2103.61	0.13288	10344.3	2.93727	1912.48	34.9	7758300	4176	182728	65.7815	874	308.87	265.346	367.356
Gansu	2021	3997.94	580	1338.6	2384.85	1231.5	77.0542	2.8107	17.0728	548	2439.54	0.133228	11432.8	2.98666	2280.72	38.3	7370418	3411	322610	114.005	874	344.36	308.636	389.707
Gansu	2022	4061.94	614	1349.48	2516.66	1265	77.1271	2.7	17.8	487.9	2680.74	0.135275	12165.2	3.01	2484.03	51.3	7515136	3339	118761	108.92	874	361.066	281.441	408.801
Gansu	2023	4139.59	587	1423.7	2638.66	1272.9	76.6099	2.6	18.8	375.26	2927.7	0.138345	13131	2.90763	2676.7	55	762.61	1310	215805	135.9	872	374.69	314.164	410.846
Qinghai	2011	547.73	121.82	251.67	430.693	103.4	8.27	0.1995	0.5406	285.5	230.819	0.0928378	4806	2.17638	69.44	7.1	1047400	45	16368.9	4.0709	154	1.96	6.76	93.42
Qinghai	2012	554.211	115.09	251.67	434.99	101.7	9.3	0.1805	0.5329	154.9	263.861	0.0934282	5594	2.20213	88.62	5.7	1343056	60	21060.6	4.4595	170	47.12	51.85	126.3
Qinghai	2013	555.774	116.6	186.895	410.58	102.4	9.8	0.1997	0.6472	171.2	310.302	0.0978248	6462	2.97372	125.07	6.2	1596910	105	15770.4	4.5	189	88.18	113.42	224.82
Qinghai	2014	553.7	116.2	182.494	440.9	104.8	9.74	0.1886	0.7046	169.8	327.492	0.0937473	7282.73	3.03407	140.61	6.1	1900408	147	13578.2	4.96	217	139.24	108.4	236.23
Qinghai	2015	558.39	115.09	196.988	453.87	104	10.13	0.1956	0.7377	220.5	319.265	0.0864401	7933.41	2.83464	208.03	4.1	2044100	259	16002.2	5.91	246	159.59	136.5	419.14
Qinghai	2016	561.327	115.16	202.35	458.56	104.8	8.76	0.1939	0.7944	134.7	338.798	0.0859828	8664.36	2.77404	280.89	5.2	2323500	164	13077.8	5.94	279	177.731	182.265	308.106
Qinghai	2017	555.314	114.79	206.61	462.35	102.5	8.67	0.1875	0.8416	272.4	364.097	0.0908287	9462.3	2.68774	334.87	4	2331198	405	15254.1	6.4153	307	215.675	251.093	301.422
Qinghai	2018	557.253	110.14	214.04	472.09	103.1	8.32	0.1784	7.556	51.9	405.934	0.0935701	10393.3	2.6035	514.91	5.4	2678537	445	30431	6.5515	324	251.689	235.313	351.433
Qinghai	2019	557.253	110.14	214.04	472.09	103.1	8.32	0.1784	7.556	51.9	405.934	0.0935701	10393.3	2.6035	809.5	5.4	2678537	623	1724.6	6.5515	343	272.897	252.746	369.187
Qinghai	2020	571.421	71	219.247	491.413	107.4	5.45	0.1233	0.7378	43	507.102	0.111214	12342.5	2.60629	941.43	11	2798000	888	3010.9	7.4998	374	292.063	264.667	379.582
Qinghai	2021	583.867	69	219.2	493.319	109.1	4.88581	0.1069	0.7159	45	528.53	0.105389	13604.2	2.66363	1002.22	9.1	2510510	581	31734.5	14.4771	392	325.516	300.326	398.07
Qinghai	2022	586.191	72	222.014	503.27	107.3	4.7095	0.1	0.7	92.9	566.214	0.105316	14456.2	2.64033	1093.49	3.9	2751317	668	16462.8	14.5518	392	340.822	260.568	418.944
Qinghai	2023	598.799	70	222.1	517.824	116.2	4.53913	0.1	0.8	41.01	575.6	0.101866	15614	2.69608	1304.66	8.1	271.36	249	27573.8	17.4	388	357.56	302.251	418.422
Ningxia	2011	1260.39	163.8	477.59	768.73	359	38.24	0.2692	1.5244	434.7	354.68	0.0875935	5931	2.63906	67.18	10	1121900	90	13201.8	12.009	31	32.27	23.16	42.96
Ningxia	2012	1241.18	155.5	491.35	787.28	375	39.44	0.274	1.5282	260.3	385.149	0.0851667	6776	2.52606	154.54	11.3	1397982	141	22034.8	12.7507	31	76.78	90.34	115.46
Ningxia	2013	1264.65	147.3	498.56	801.98	373.4	40.44	0.2699	1.6627	301.3	429.997	0.0865078	7599	2.53661	246.35	13	1493837	243	28269.4	13.84	33	115.08	129.02	222.32
Ningxia	2014	1253.16	134.5	498.91	813.02	377.9	39.6682	0.2586	1.5281	438.3	445.471	0.0788452	8410.02	2.5118	309	15.5	1570466	219	1552.86	13.56	34	167.18	114.28	251.55
Ningxia	2015	1264.63	125.5	506.53	831.26	372.6	40.0881	0.2593	1.5642	218.8	483.021	0.0816548	9118.69	2.49666	328.64	18.8	1662700	246	15903.6	13.79	34	190.35	134.87	440.18
Ningxia	2016	1275.24	117.6	515.15	580.54	370.7	40.72	0.2587	1.5137	390.4	493.605	0.0762484	9851.63	2.47547	396.08	16.5	2012900	455	14658.8	14.16	34	205.917	179.619	293.115
Ningxia	2017	1132.63	106.3	511.45	605.38	370.1	40.7994	0.254	1.5087	174.4	517.417	0.0727793	10737.9	2.21454	536.47	13.2	2223884	736	51283.8	14.6279	34	242.416	252.208	305.24
Ningxia	2018	1164.57	98.3	523.447	621.88	392.6	38.3747	0.2266	1.4975	148.1	575.775	0.0755294	11707.6	2.22481	698.08	13.6	2190612	961	41847.4	15.0523	34	274.252	225.275	355.139
Ningxia	2019	1152.96	90.6	538.286	632.153	373.2	38.438	0.2245	1.56	29.1	584.847	0.0746783	12858.4	2.14191	829.47	38.6	2181568	1170	64788.2	16.1156	34	299.044	241.548	362.349
Ningxia	2020	1174.23	83	552.531	644.089	380.5	38.0562	0.2174	1.6388	175	703.072	0.0862149	13889.4	2.12518	836.7	42.6	2534500	1525	52246.6	16.8478	34	320.451	262.722	361.516
Ningxia	2021	1175.91	81	552.5	653.823	368.4	37.4564	0.2204	1.7958	376	759.805	0.0806004	15336.6	2.12834	897.12	49	2423738	1579	91866.4	40.6251	34	355.277	305.29	382.402
Ningxia	2022	1189.49	94	560.573	663.43	375.8	36.8764	0.2	2.1	68.6	845.922	0.0803811	16430.3	2.12192	1142.02	27.4	2448793	1756	103885	33.3462	34	384.542	278.228	406.935
Ningxia	2023	1199.1	84	564	673.175	378.8	36.6789	0.2	2.8	163.58	885.7	0.0805456	17772	2.12606	1382.77	21.7	274.52	626	120319	51.8	34	400.159	310.454	400.919
Xinjiang	2011	4983.47	600.97	3884.57	1796.68	1224.7	183.68	1.934	18.2977	678.3	1955.39	0.172318	5853	1.28289	1523.6	70.1	2975900	517	16530.6	71.6494	87	12.92	23.6	38.92
Xinjiang	2012	5123.9	607.14	4029.07	1968.93	1517.4	192.7	1.9848	18.7756	1125.8	2275.67	0.175951	6876	1.27173	1923.32	122.7	3653939	635	69392.6	75.8081	94	60.88	85.14	148.76
Xinjiang	2013	5212.26	581.8	4769.89	2165.86	1377	203.221	2.1285	20.6666	564.8	2538.88	0.173889	7847	1.09274	2629.51	109.6	3874153	918	118797	83.92	96	101.44	146.39	276.48
Xinjiang	2014	5517.63	574.1	4831.89	2341.76	1414.5	236.98	3.0439	26.2921	1848.6	2744.01	0.165914	8723.83	1.14192	3182.45	81.6	4772699	950	41468.4	96.52	100	151.28	134.87	256.91
Xinjiang	2015	5757.25	569.55	4944.92	2489.32	1895.3	248.093	2.5838	26.8901	960	2804.42	0.167197	9425.08	1.16428	3505.2	48.8	6053400	1361	73785.1	104.07	104	172.01	148.6	419.4
Xinjiang	2016	5867.52	573.87	4982.03	2552.15	1552.3	250.21	2.7596	26.6198	808	2969.7	0.170883	10183.2	1.17774	3614.19	54	7170200	1530	72127.4	108.16	106	190.324	190.111	303.306
Xinjiang	2017	5886.96	546.62	4952.29	2638.84	1484.7	250.74	2.767	25.2646	287.5	3326.59	0.142607	11045.3	1.18874	3992.41	86.6	6124893	1502	90361.7	111.133	107	228.819	249.099	313.562
Xinjiang	2018	6068.89	539.62	4883.46	2731.79	1504.2	254.99	2.3732	26.9839	746	3637.79	0.138706	11974.5	1.24274	4850.94	130.3	7532460	1232	79055.6	119.545	108	267.351	232.937	357.37
Xinjiang	2019	6169.99	489.16	4959.89	2788.97	1527.1	257.763	2.2948	26.2677	572.6	3850.65	0.131039	13121.7	1.24398	6683.46	140	9774128	1501	62549.4	124.825	108	293.483	256.309	366.301
Xinjiang	2020	6280.01	460	4893.35	2929.44	1583.4	248.227	2.1823	25.9674	638	4315.61	0.143596	14056.1	1.28338	7869.57	111.8	11278800	2665	83237	127.505	108	310.218	273.854	364.882
Xinjiang	2021	6387.42	455	4893.4	2995.88	1735.8	240.686	2.0388	26.1479	692	5143.12	0.147407	15575.3	1.30531	7037.93	126.7	8495539	2490	72703	269.919	107	345.924	313.191	379.993
Xinjiang	2022	6493.13	481	6534.69	3075.35	1813.5	243.682	2	27.9	237.2	5469.04	0.141438	16549.9	0.99364	7486.4	89.6	9500928	2545	79696.9	218.716	107	364.456	268.693	405.115
Xinjiang	2023	6839.83	446	6629.6	3181.07	2119.2	247.659	1.9	31.3	412.97	5648.3	0.143376	17948	1.03171	8056.56	89.4	1317.08	1311	199058	313.1	105	381.625	298.946	404.49
	max	15304.2	2210	6629.6	13353	7867.7	716.09	16.4812	31.8727	4223.7	12531.9	0.261323	42988	5.81518	10137.4	315.4	13593218	21902	5.46597e+06	2010.96	1715	466.54	510.694	476.896
	min	88.55	20	109.243	93.97	28.8	4.53913	0.1	0.5329	0.35	230.819	0.00203521	4278	0.810578	21.19	0.1	126.95	45	1552.86	4.0709	31	1.96	6.76	7.58
	DV	15215.7	2190	6520.36	13259	7838.9	711.551	16.3812	31.3398	4223.35	12301.1	0.259288	38710	5.0046	10116.2	315.3	1.35931e+07	21857	5.46442e+06	2006.89	1684	464.58	503.934	469.316
standardization
Beijing	2011	0.0140664	0.0173744	0.0153499	0.012914	0.0118639	0.986929	0.982077	0.974668	0.9868	0.0107567	0.0244887	0.244485	0.126861	0.0404904	0.0202981	0.137811	0.11255	0.00384819	0.020594	0.0861045	0.205713	0.129918	0.0532903
Beijing	2012	0.0127609	0.0165845	0.0150754	0.0110966	0.0108434	0.987168	0.982425	0.976962	0.983224	0.0134048	0.02455	0.286412	0.110227	0.0485774	0.024104	0.163819	0.125635	0.0309332	0.0215464	0.0902613	0.330621	0.302936	0.23628
Beijing	2013	0.0101149	0.0161644	0.0067139	0.00857905	0.00858539	0.988417	0.982517	0.977578	0.993714	0.0155242	0.0236713	0.331258	0.154635	0.0530702	0.00602601	0.218939	0.16004	0.220125	0.0221532	0.0902613	0.413061	0.477721	0.473007
Beijing	2014	0.00706863	0.0147945	0.00519404	0.00767702	0.00447767	0.990021	0.98411	0.982214	0.987463	0.0153847	0.0208969	0.376887	0.111842	0.0425475	0.0101491	0.252816	0.166766	0.125208	0.0231647	0.0926366	0.520814	0.422932	0.485046
Beijing	2015	0.00559818	0.0138356	0.00431065	0.00694469	0.00431183	0.991583	0.986729	0.983813	0.998615	0.0111712	0.0156467	0.42084	0.090775	0.0546508	0.00507453	0.312488	0.193988	0.281236	0.0237178	0.0944181	0.573486	0.451269	0.792429
Beijing	2016	0.00412818	0.013516	0.00294876	0.00380721	0.00306165	0.992813	0.987602	0.98552	0.991867	0.00871831	0.0116514	0.46581	0.0734562	0.0572279	0.00507453	0.326296	0.213433	0.238127	0.0252326	0.0950119	0.610635	0.509944	0.68678
Beijing	2017	0.00212866	0.012968	0.000956389	0.00298211	0.0015691	0.994364	0.989464	0.988373	0.998496	0.00630015	0.00872855	0.515693	0.0472971	0.0610455	0.0076118	0.381321	0.240518	0.351109	0.0286198	0.0950119	0.67622	0.695482	0.678516
Beijing	2018	0.00100153	0.0115982	6.57939e-05	0.00238959	0.000676115	0.996129	0.990391	0.990702	0.99897	0.00536137	0.00724819	0.573813	0.027131	0.0747325	0.00285442	0.423766	0.242165	0.758035	0.0304282	0.0950119	0.757473	0.714422	0.87917
Beijing	2019	0	0.0102283	0	0.00217755	0	0.997704	0.992327	0.992438	0.999491	0.00413669	0.00454698	0.636797	0	0.0785461	0.00253727	0.43008	0.268015	0.00803477	0.0317388	0.0950119	0.823746	0.784447	0.923143
Beijing	2020	0.000633097	0.00972603	1.64101e-05	0.00197979	0.000216867	0.997859	0.992986	0.992875	0.999609	0.00265128	0.00364639	0.667725	0.017444	0.0961298	0.0158579	0.36586	0.309192	0.16826	0.0325248	0.0950119	0.85032	0.87129	0.912906
Beijing	2021	0.00192544	0.00319635	2.40784e-05	0.00205713	0.00114812	0.997529	0.991857	0.994113	0.996531	0.00314566	0.00281025	0.749799	0.0532776	0.126898	0.0152236	0.366255	0.275564	0.135639	0.0312969	0.0944181	0.927647	0.927776	0.909344
Beijing	2022	0.003632	0.00228311	0.000443534	0.0020494	0.00211764	0.997091	0.993895	0.994668	0.997905	0.00303687	0.00248517	0.787286	0.094298	0.147687	0.00253727	0.34045	0.233838	0.386408	0.028181	0.0938242	0.977156	0.870824	0.954992
Beijing	2023	0.00462867	0.00182648	0.00134302	0.00226067	0.00242381	0.996893	0.993895	0.994668	0.996519	0.00177067	0.00144869	0.85456	0.10724	0.174714	0.0038059	2.85866e-05	0.0932424	0.318981	0.0343462	0.0938242	0.999429	0.897522	0.970895
Tianjin	2011	0.0249368	0.0205479	0.0350835	0.0369483	0.0169667	0.972102	0.982932	0.976902	0.998165	0.0096468	0.0466284	0.197959	0.11469	0.00358138	0.026007	0.0675103	0.0367388	0.0411825	0.0235319	0.00296912	0.145099	0.0924128	0.0791364
Tianjin	2012	0.0256591	0.0187215	0.0349363	0.0357612	0.0171963	0.972018	0.982858	0.977434	0.968449	0.0117717	0.0434784	0.240635	0.121994	0.00714793	0.0183952	0.0742759	0.0462095	0.0463345	0.0236907	0.00356295	0.233867	0.256006	0.283093
Tianjin	2013	0.0253003	0.0164384	0.030616	0.0347091	0.0186123	0.972172	0.98389	0.975839	0.998236	0.0147585	0.042476	0.286102	0.14436	0.0142632	0.0111005	0.0904986	0.0672553	0.0707292	0.0324627	0.00356295	0.311206	0.378541	0.47322
Tianjin	2014	0.0256628	0.0164384	0.030616	0.0345696	0.0187781	0.973676	0.983872	0.97784	0.997644	0.0171444	0.0411722	0.329015	0.147929	0.0173662	0.00792896	0.0992388	0.0728828	0.0770289	0.0523043	0.00356295	0.413061	0.34433	0.531688
Tianjin	2015	0.0250054	0.0150685	0.0306161	0.0341616	0.0198625	0.97577	0.984568	0.983334	0.996957	0.0192356	0.0408477	0.366924	0.141456	0.0232607	0.00444022	0.114814	0.0959418	0.0859868	0.0490157	0.00415677	0.45187	0.374453	0.833212
Tianjin	2016	0.0256722	0.0141553	0.0302709	0.0283595	0.0218908	0.976363	0.985917	0.97985	0.9944	0.0214309	0.0396379	0.408102	0.150295	0.026844	0.00983191	0.118448	0.125589	0.0398728	0.0439083	0.00415677	0.480976	0.446198	0.706489
Tianjin	2017	0.0230663	0.0127854	0.0302709	0.0279568	0.0234089	0.981068	0.991741	0.982205	0.996957	0.0122954	0.0272806	0.451451	0.124456	0.0358711	0.00697748	0.116493	0.130668	0.137605	0.0180623	0.00415677	0.550914	0.602009	0.671882
Tianjin	2018	0.022393	0.0114155	0.0299703	0.0191575	0.0230772	0.982561	0.992736	0.988063	0.996673	0.0129811	0.0275631	0.485333	0.11958	0.0471243	0.0114177	0.121896	0.153543	0.179597	0.0163654	0.00415677	0.631511	0.617498	0.806544
Tianjin	2019	0.0211441	0.0105023	0.0299915	0.0200518	0.0248122	0.983557	0.992852	0.991171	0.996957	0.0149203	0.0428006	0.530253	0.106994	0.048445	0.0215668	0.11881	0.15272	0.0580252	0.0175217	0.00415677	0.692876	0.679161	0.84065
Tianjin	2020	0.021729	0.00730594	0.0291208	0.0204475	0.0254372	0.984895	0.993914	0.993006	0.996058	0.0199677	0.0497068	0.553155	0.118044	0.0581373	0.0177609	0.113887	0.175962	0.0891132	0.0184068	0.00415677	0.728249	0.728561	0.85477
Tianjin	2021	0.0229009	0.00639269	0.0291176	0.0210055	0.0282055	0.984374	0.99547	0.994225	0.998662	0.0226353	0.0475379	0.611638	0.129976	0.0602933	0.012052	0.108876	0.126458	0.145174	0.0288849	0.00415677	0.817481	0.789383	0.891383
Tianjin	2022	0.0233287	0.00593607	0.0283316	0.0208761	0.0290092	0.984564	0.993895	0.994668	0.99897	0.0236253	0.0567237	0.639105	0.13949	0.0624868	0.00444022	0.0811328	0.101569	0.145534	0.0241179	0.00415677	0.872295	0.736531	0.966196
Tianjin	2023	0.0239587	0.00547945	0.0306359	0.0207277	0.0289454	0.984683	0.993895	0.997859	0.993867	0.0228013	0.0540202	0.686463	0.131031	0.0713952	0.018078	0	0.0403075	0.0982533	0.0332998	0.00356295	0.907449	0.773674	0.982048
Hebei	2011	0.570802	0.66895	0.688208	0.773451	0.401051	0.547833	0.49939	0.622027	0.672547	0.37924	0.449268	0.0751485	0.219429	0.0730787	0.514431	0.269319	0.0277714	0.028613	0.276619	0.342043	0.0355159	0.0742755	0.105622
Hebei	2012	0.571334	0.638356	0.6892	0.788883	0.435495	0.543545	0.488249	0.611957	0.685404	0.415353	0.454617	0.100232	0.219245	0.125028	0.483666	0.326349	0.0345427	0.0619378	0.293921	0.375891	0.136683	0.201197	0.269157
Hebei	2013	0.569194	0.618721	0.650238	0.804639	0.425595	0.541142	0.476717	0.583032	0.738087	0.455417	0.466789	0.126841	0.240016	0.164262	0.337774	0.375997	0.04685	0.0522585	0.305098	0.404988	0.223212	0.309743	0.500238
Hebei	2014	0.566819	0.601826	0.658703	0.818225	0.424983	0.534719	0.479104	0.576931	0.660139	0.468575	0.444066	0.152626	0.233339	0.174874	0.264193	0.429267	0.0566409	0.045865	0.312553	0.437648	0.318589	0.247215	0.51624
Hebei	2015	0.568577	0.580822	0.665413	0.830289	0.455855	0.534885	0.497424	0.576724	0.574165	0.467281	0.437193	0.174955	0.230652	0.215572	0.284174	0.524147	0.0791966	0.0917778	0.302831	0.45962	0.367687	0.287121	0.783309
Hebei	2016	0.567053	0.53242	0.666896	0.551171	0.478919	0.540091	0.507417	0.575284	0.657417	0.475815	0.412187	0.1974	0.228761	0.223988	0.281002	0.589106	0.0931052	0.00159604	0.29733	0.471496	0.408088	0.37726	0.668802
Hebei	2017	0.545037	0.486758	0.669507	0.564642	0.484813	0.553852	0.53225	0.608259	0.830076	0.418058	0.347023	0.222241	0.212315	0.252491	0.243895	0.575955	0.139086	0.0135661	0.304493	0.475653	0.497077	0.529217	0.65262
Hebei	2018	0.53291	0.439269	0.672216	0.574116	0.468446	0.567344	0.630979	0.666545	0.868197	0.445179	0.349652	0.251948	0.202636	0.301831	0.223597	0.666701	0.170472	0.0949092	0.249683	0.476247	0.564169	0.518252	0.775533
Hebei	2019	0.528675	0.419178	0.670656	0.583507	0.473332	0.588603	0.656045	0.687675	0.925569	0.473994	0.3787	0.28662	0.200591	0.358817	0.142087	0.719669	0.231871	0.0539287	0.247895	0.476841	0.607919	0.576605	0.809269
Hebei	2020	0.525832	0.363014	0.668795	0.59369	0.480565	0.604853	0.674694	0.685981	0.912238	0.529358	0.405458	0.314881	0.199642	0.486517	0.175071	0.727375	0.304388	0.132743	0.251995	0.477435	0.650341	0.618444	0.818933
Hebei	2021	0.526342	0.345662	0.668791	0.603576	0.48429	0.617276	0.684449	0.691415	0.907976	0.55181	0.376979	0.359104	0.199991	0.509116	0.153822	0.68033	0.248936	0.122022	0.235199	0.476841	0.718346	0.686977	0.850734
Hebei	2022	0.527446	0.365297	0.612484	0.61506	0.489393	0.624628	0.694772	0.69473	0.968047	0.604548	0.393593	0.389723	0.233198	0.631141	0.104662	0.641599	0.236583	0.200482	0.23279	0.476841	0.766255	0.624507	0.923081
Hebei	2023	0.52641	0.351142	0.61542	0.626726	0.482351	0.63195	0.700877	0.691539	0.847649	0.612961	0.384123	0.423921	0.230599	0.716893	0.168094	5.89682e-05	0.0945692	0.378647	0.294898	0.477435	0.803613	0.667347	0.918918
Shanxi	2011	0.243753	0.223288	0.185666	0.21369	0.148516	0.845369	0.832845	0.884486	0.759752	0.0794036	0.212285	0.0502971	0.412935	0.0235335	0.153187	0.177618	0.0148236	0.000166603	0.0411221	0.394299	0.0580739	0.0294681	0.132086
Shanxi	2012	0.244458	0.226941	0.185545	0.223404	0.163365	0.840151	0.824128	0.87066	0.779642	0.0872636	0.214495	0.0719711	0.414905	0.0365245	0.166508	0.227774	0.0193073	0.00949111	0.0452844	0.455463	0.157648	0.158195	0.332228
Shanxi	2013	0.242769	0.235616	0.195319	0.232998	0.163798	0.836301	0.819708	0.868953	0.623036	0.0988683	0.227785	0.0948334	0.384603	0.0446343	0.170948	0.249887	0.0219609	0.0082	0.0476902	0.530285	0.244177	0.262574	0.513875
Shanxi	2014	0.242834	0.211872	0.199211	0.240759	0.166095	0.838276	0.816686	0.862628	0.722223	0.105654	0.230565	0.117061	0.374894	0.0546212	0.186806	0.241182	0.0294642	0.0214404	0.0463449	0.596793	0.34698	0.234197	0.538762
Shanxi	2015	0.241801	0.204566	0.207202	0.245695	0.163952	0.839775	0.81665	0.864278	0.729539	0.105017	0.228741	0.13371	0.353586	0.0538679	0.201395	0.290182	0.0297845	0.0137633	0.0462203	0.671021	0.396444	0.267416	0.816059
Shanxi	2016	0.238718	0.205023	0.211345	0.124465	0.172409	0.841849	0.81961	0.860902	0.880817	0.105942	0.224072	0.149947	0.337921	0.0607925	0.230891	0.317814	0.0436931	0.0182659	0.0465641	0.748219	0.438128	0.362383	0.735918
Shanxi	2017	0.229308	0.2	0.215014	0.0967136	0.169195	0.848979	0.830104	0.857469	0.805616	0.0965696	0.170765	0.168161	0.311075	0.0748155	0.225182	0.35157	0.0662946	0.0192576	0.0474334	0.823634	0.518883	0.492563	0.676179
Shanxi	2018	0.227832	0.190411	0.216159	0.1016	0.172422	0.852334	0.844071	0.860439	0.803367	0.0999771	0.161994	0.193025	0.305794	0.0910093	0.222328	0.42766	0.0731116	0.0302235	0.0485054	0.875891	0.59208	0.482146	0.766252
Shanxi	2019	0.225811	0.184932	0.216261	0.107368	0.170049	0.854024	0.851543	0.862073	0.651142	0.113464	0.178958	0.222794	0.301547	0.111482	0.170948	0.460551	0.0840921	0.0321908	0.0502414	0.918646	0.653601	0.538028	0.783022
Shanxi	2020	0.226935	0.190868	0.21596	0.113228	0.178022	0.855427	0.854309	0.861955	0.756201	0.138607	0.198988	0.247998	0.304397	0.151349	0.151919	0.480882	0.101569	0.0362416	0.0523984	0.97209	0.700261	0.564766	0.800005
Shanxi	2021	0.229987	0.173973	0.215963	0.117676	0.177627	0.857911	0.862074	0.864195	0.724709	0.154718	0.211857	0.284947	0.310506	0.202046	0.168094	0.378292	0.0798371	0.0187814	0.0759178	0.991093	0.778489	0.64486	0.830999
Shanxi	2022	0.23154	0.179909	0.213603	0.122203	0.183125	0.860959	0.8657	0.860653	0.911954	0.161024	0.19375	0.311152	0.318492	0.235758	0.119886	0.424373	0.0682161	0.081036	0.0757822	1	0.832479	0.570374	0.882848
Shanxi	2023	0.23352	0.173059	0.211899	0.128936	0.184886	0.861317	0.871804	0.84789	0.895813	0.167537	0.200593	0.346138	0.326111	0.263659	0.125912	3.92876e-05	0.0290067	0.113184	0.0946385	0.980998	0.864485	0.638986	0.881256
Inner Mongolia	2011	0.461455	0.300548	0.454446	0.232198	0.300897	0.757714	0.856702	0.823448	0.517859	0.160448	0.342991	0.0688194	0.300433	0.165965	0.230257	0.288137	0.0166995	0.0104819	0.0240313	0.0267221	0.0488398	0.0466529	0.069825
Inner Mongolia	2012	0.464351	0.29032	0.462551	0.240333	0.345839	0.740713	0.823432	0.79609	0.512153	0.180351	0.343949	0.0950142	0.295431	0.187761	0.285442	0.331654	0.0179805	0.0192273	0.0254541	0.0296912	0.157282	0.175975	0.281686
Inner Mongolia	2013	0.468111	0.279726	0.436865	0.251647	0.350075	0.721896	0.814837	0.759115	0.589721	0.200688	0.356793	0.121596	0.325196	0.273126	0.219474	0.34324	0.0223269	0.0301454	0.0276493	0.0320665	0.246265	0.262098	0.538805
Inner Mongolia	2014	0.477627	0.269132	0.445165	0.26688	0.347523	0.693446	0.817626	0.731715	0.555341	0.207217	0.345448	0.147205	0.326047	0.294728	0.261656	0.380841	0.0281832	0.0306876	0.0294232	0.0332542	0.351931	0.214552	0.624866
Inner Mongolia	2015	0.491555	0.257671	0.456671	0.279895	0.416359	0.684055	0.804892	0.713808	0.360591	0.20492	0.341977	0.167861	0.327906	0.307829	0.230891	0.496993	0.0332617	0.0207554	0.0339775	0.0332542	0.394722	0.256541	0.950489
Inner Mongolia	2016	0.514821	0.244703	0.463516	0.244145	0.412622	0.676617	0.808689	0.711862	0.140599	0.208388	0.340502	0.189383	0.343513	0.314857	0.252775	0.536307	0.0360983	0.0209287	0.0333945	0.033848	0.430576	0.353479	0.844669
Inner Mongolia	2017	0.58661	0.234475	0.470156	0.255643	0.411499	0.676059	0.788672	0.716089	0.072549	0.209959	0.387442	0.214577	0.405367	0.319522	0.249921	0.5942	0.0514252	0.0324744	0.0372866	0.033848	0.510052	0.48109	0.708511
Inner Mongolia	2018	0.574114	0.222511	0.473483	0.269227	0.449617	0.693441	0.825501	0.717165	0.377402	0.223923	0.383376	0.246049	0.389631	0.348442	0.374564	0.665008	0.0567324	0.0246201	0.0405796	0.033848	0.575857	0.447584	0.729113
Inner Mongolia	2019	0.578119	0.207854	0.473892	0.284519	0.462271	0.699393	0.839584	0.716447	0.655925	0.239452	0.409625	0.284289	0.392977	0.389787	0.33365	0.643504	0.0759025	0.0214584	0.0433927	0.033848	0.62312	0.503147	0.757266
Inner Mongolia	2020	0.577974	0.193151	0.473882	0.29886	0.463751	0.71449	0.863099	0.712927	0.439391	0.263516	0.442058	0.31746	0.392851	0.432323	0.399619	0.638249	0.106877	0.0414065	0.0444181	0.033848	0.66391	0.533595	0.76669
Inner Mongolia	2021	0.568808	0.183562	0.473879	0.312651	0.486229	0.666421	0.843162	0.697091	0.696059	0.291381	0.410493	0.363183	0.384143	0.530587	0.424992	0.602384	0.0970398	0.000677135	0.0576607	0.033848	0.742454	0.618817	0.80478
Inner Mongolia	2022	0.56929	0.191324	0.654883	0.339576	0.493921	0.686846	0.853491	0.650058	0.6698	0.332161	0.434084	0.396873	0.237303	0.664907	0.373612	0.67124	0.100792	0.0052221	0.0494378	0.033848	0.805779	0.553766	0.843851
Inner Mongolia	2023	0.573114	0.180822	0.720782	0.364354	0.501218	0.696067	0.853491	0.611768	0.473525	0.342773	0.420826	0.437691	0.204046	0.735889	0.381541	6.29533e-05	0.0505101	0.0413761	0.0867158	0.033848	0.844711	0.62899	0.840144
Liaoning	2011	0.266641	0.310457	0.226849	0.173913	0.255993	0.803105	0.6608	0.559605	0.893485	0.276627	0.324535	0.096435	0.359554	0.054383	0.212496	0.242173	0.0404447	0.0376461	0.180508	0.0486936	0.0925567	0.0751685	0.0591285
Liaoning	2012	0.270906	0.308082	0.243787	0.183491	0.273788	0.799926	0.645612	0.554161	0.915932	0.311486	0.326782	0.12356	0.333282	0.0713587	0.232477	0.297949	0.0408565	0.0773049	0.184049	0.0498812	0.187373	0.225426	0.241479
Liaoning	2013	0.270787	0.303105	0.199161	0.191417	0.276416	0.793098	0.639617	0.550926	0.893414	0.33484	0.321177	0.151976	0.435386	0.106198	0.250238	0.343198	0.0496866	0.0725473	0.194684	0.0498812	0.268436	0.346831	0.476757
Liaoning	2014	0.267852	0.304977	0.209302	0.198826	0.220069	0.793393	0.638036	0.550482	0.542768	0.346924	0.300098	0.178597	0.402533	0.110912	0.284491	0.326517	0.0490003	0.0932099	0.213763	0.0516627	0.37352	0.309822	0.564544
Liaoning	2015	0.271517	0.305662	0.216409	0.205135	0.275268	0.792639	0.640594	0.564091	0.648987	0.362236	0.312864	0.200953	0.392656	0.158497	0.288297	0.32815	0.0547651	0.154494	0.226066	0.0528504	0.413728	0.34062	0.878895
Liaoning	2016	0.26128	0.312968	0.224489	0.156458	0.291725	0.798302	0.662638	0.578989	0.862301	0.340698	0.368872	0.222235	0.354294	0.176626	0.360926	0.353648	0.0619024	0.00129417	0.242031	0.0534442	0.442932	0.423274	0.687457
Liaoning	2017	0.268393	0.31726	0.230249	0.159979	0.293651	0.801944	0.655251	0.618817	0.775238	0.294349	0.305555	0.244609	0.355681	0.194093	0.335553	0.337833	0.0805692	0.0316422	0.261068	0.0546318	0.512102	0.564568	0.652
Liaoning	2018	0.270679	0.31589	0.231595	0.162135	0.276008	0.802565	0.669927	0.640562	0.652657	0.311445	0.301918	0.268105	0.357169	0.226682	0.321281	0.339681	0.100197	0.025016	0.150554	0.0546318	0.580854	0.541173	0.782909
Liaoning	2019	0.271335	0.297443	0.233106	0.170443	0.306318	0.809758	0.69432	0.654829	0.923201	0.336347	0.329333	0.305613	0.355255	0.276967	0.450999	0.369717	0.136341	0.0725062	0.086154	0.0546318	0.625262	0.586904	0.810093
Liaoning	2020	0.275981	0.278995	0.233621	0.179296	0.294684	0.813044	0.733096	0.652034	0.687061	0.353769	0.342981	0.340283	0.36284	0.35381	0.49445	0.371378	0.214211	0.0593608	0.0899332	0.0534442	0.656835	0.637699	0.807032
Liaoning	2021	0.278685	0.26484	0.233616	0.18543	0.320185	0.81661	0.741252	0.652024	0.941125	0.381829	0.336351	0.385911	0.36789	0.363639	0.55471	0.301204	0.177746	0.0863103	0.0816413	0.0522565	0.72784	0.708699	0.839828
Liaoning	2022	0.278549	0.280365	0.246518	0.193368	0.313271	0.822967	0.749713	0.65644	0.811275	0.402339	0.337903	0.403771	0.34168	0.501036	0.519822	0.340854	0.152445	0.0821592	0.0627726	0.0516627	0.781268	0.647596	0.888878
Liaoning	2023	0.280821	0.259817	0.247219	0.205888	0.323336	0.82437	0.755818	0.653249	0.922337	0.409393	0.330593	0.444459	0.344356	0.591305	0.486838	2.6779e-05	0.058288	0.117874	0.0934924	0.0516627	0.815827	0.685831	0.889186
Jilin	2011	0.3374	0.28853	0.260458	0.17053	0.400847	0.73205	0.727767	0.834906	0.854132	0.166191	0.458306	0.0866959	0.415346	0.0770535	0.393593	0.188005	0.0195361	0.0149199	0.0191522	0.457245	0.0469026	0.0342902	0.0432118
Jilin	2012	0.3435	0.278073	0.267259	0.185585	0.436464	0.715845	0.693313	0.836084	0.850249	0.184634	0.448302	0.115293	0.411535	0.0852216	0.543292	0.214291	0.0206799	0.0185733	0.0209511	0.502969	0.145228	0.17278	0.269349
Jilin	2013	0.349936	0.268078	0.214848	0.198813	0.449323	0.701707	0.694705	0.830388	0.852522	0.198339	0.438334	0.14216	0.554273	0.0895344	0.591817	0.234128	0.0261701	0.00852802	0.0220037	0.550475	0.225774	0.280175	0.463206
Jilin	2014	0.363227	0.258689	0.232992	0.213071	0.447001	0.687836	0.64278	0.832389	0.836871	0.205851	0.417972	0.16797	0.527055	0.088968	0.559467	0.227076	0.0259413	0.0385431	0.0222628	0.602732	0.329222	0.256482	0.52666
Jilin	2015	0.367421	0.249726	0.257905	0.230678	0.503298	0.681399	0.625882	0.828222	0.799721	0.215412	0.429919	0.182076	0.471678	0.107403	0.290834	0.300592	0.0320721	0.0498479	0.0226864	0.637767	0.37352	0.29353	0.864854
Jilin	2016	0.367238	0.240292	0.264238	0.227112	0.525826	0.678072	0.648847	0.826942	0.822925	0.202751	0.383261	0.202659	0.457091	0.144486	0.312084	0.404976	0.0385231	0.0173271	0.0234488	0.675178	0.408927	0.391674	0.67334
Jilin	2017	0.394176	0.231297	0.273575	0.240642	0.526247	0.681702	0.662455	0.823155	0.767306	0.14905	0.274829	0.224036	0.480447	0.168474	0.324453	0.408115	0.0462095	0.0243456	0.0243615	0.70962	0.485355	0.52956	0.645913
Jilin	2018	0.393827	0.223096	0.273575	0.254319	0.459746	0.685535	0.694827	0.837628	0.687606	0.158809	0.289119	0.244644	0.479887	0.198002	0.365683	0.395449	0.0569154	0.0290653	0.0253043	0.725653	0.547992	0.493053	0.790264
Jilin	2019	0.396204	0.214434	0.276098	0.268479	0.491026	0.687276	0.709069	0.847475	0.873122	0.179814	0.415524	0.275331	0.478141	0.223228	0.293689	0.415163	0.0608501	0.0384286	0.0253156	0.739311	0.589323	0.534135	0.792727
Jilin	2020	0.398434	0.206388	0.275475	0.286821	0.481496	0.689755	0.719618	0.85311	0.711449	0.223166	0.478652	0.304547	0.483065	0.264146	0.319061	0.42503	0.0899025	0.0227436	0.0261542	0.742874	0.621681	0.577202	0.804801
Jilin	2021	0.400805	0.198174	0.275469	0.305849	0.511602	0.69298	0.730551	0.864958	0.942072	0.222867	0.444914	0.345226	0.48686	0.364841	0.418966	0.340104	0.0880267	0.0268883	0.0340001	0.742874	0.696159	0.649813	0.825919
Jilin	2022	0.403387	0.209589	0.275634	0.321583	0.516909	0.693336	0.737504	0.870226	0.954385	0.242831	0.490565	0.357956	0.490613	0.467057	0.339359	0.37922	0.0782358	0.0453766	0.027258	0.74228	0.744049	0.58331	0.854611
Jilin	2023	0.407732	0.196804	0.282202	0.335967	0.530393	0.693688	0.749713	0.870226	0.938338	0.235522	0.460958	0.392508	0.483053	0.534348	0.341897	3.6147e-05	0.0319348	0.0402633	0.0413222	0.741686	0.776626	0.640261	0.847341
Heilongjiang	2011	0.797492	0.300324	0.647726	0.301972	0.706961	0.685339	0.530205	0.775812	0.636201	0.243287	0.513705	0.080186	0.401739	0.16008	0.658421	0.261874	0.0457519	0.0187107	0.0269921	0.0510689	0.0412415	0.058579	0.13264
Heilongjiang	2012	0.798416	0.29558	0.715795	0.336296	0.838102	0.668694	0.51462	0.747092	0.424852	0.302533	0.587537	0.105632	0.349948	0.216949	0.670473	0.316618	0.0563206	0.0390893	0.0300246	0.0522565	0.138878	0.185937	0.273398
Heilongjiang	2013	0.796037	0.307306	0.802544	0.358646	0.762263	0.662117	0.493224	0.744577	0.352706	0.35789	0.663655	0.131516	0.294391	0.277947	0.50111	0.339645	0.0655168	0.000614669	0.0313316	0.0570071	0.220694	0.289363	0.501559
Heilongjiang	2014	0.797689	0.319269	0.796882	0.381743	0.792637	0.652322	0.472682	0.747621	0.808292	0.379152	0.661811	0.159525	0.298513	0.255472	0.503013	0.358752	0.0737521	0.00412229	0.0326321	0.057601	0.323991	0.269321	0.547243
Heilongjiang	2015	0.802165	0.307854	0.831487	0.403371	0.967865	0.647571	0.499738	0.751855	0.721797	0.391357	0.665505	0.17611	0.282188	0.28406	0.547098	0.501334	0.0968111	0.0306369	0.0341369	0.0581948	0.371777	0.312144	0.856863
Heilongjiang	2016	0.810874	0.294155	0.893125	0.41785	0.94239	0.651169	0.502637	0.753521	0	0.40378	0.661534	0.19514	0.256562	0.312671	0.537583	0.589827	0.0974516	0.0146834	0.0365735	0.0581948	0.407424	0.396445	0.731678
Heilongjiang	2017	0.964731	0.279452	0.908191	0.431388	0.94165	0.653348	0.498095	0.762471	0.632957	0.435394	0.711282	0.216658	0.327308	0.348443	0.528703	0.599678	0.121243	0.0310101	0.0377179	0.0605701	0.482234	0.533999	0.673725
Heilongjiang	2018	0.958537	0.267671	0.921779	0.451818	0.95396	0.661161	0.553256	0.769935	0.0162667	0.438455	0.699528	0.246077	0.317147	0.390217	0.55471	0.613884	0.118543	0.0221871	0.0392315	0.0593824	0.547082	0.49237	0.777089
Heilongjiang	2019	0.964895	0.250776	0.930677	0.472516	0.953476	0.692605	0.613783	0.787803	0.16172	0.463305	0.893795	0.276521	0.315776	0.425711	0.433238	0.648842	0.167086	0.033547	0.0406429	0.0593824	0.589412	0.531579	0.79867
Heilongjiang	2020	0.9741	0.23653	0.929759	0.503891	0.958298	0.69127	0.635259	0.792047	0.247363	0.504613	0.960176	0.307167	0.320774	0.503982	0.567079	0.672781	0.224688	0.0792537	0.0426788	0.0593824	0.621031	0.569389	0.793732
Heilongjiang	2021	0.98428	0.226484	0.929758	0.514227	1	0.670541	0.657595	0.822335	0.803083	0.50639	0.889767	0.351622	0.325789	0.567364	0.774818	0.63927	0.184106	0.000668788	0.056341	0.0587886	0.700921	0.651743	0.82909
Heilongjiang	2022	0.993769	0.227397	0.926889	0.527708	0.986656	0.67119	0.670354	0.831936	0.977021	0.527386	0.867691	0.369397	0.331962	0.677885	0.604186	0.689747	0.152125	0.0173191	0.0409603	0.0587886	0.748458	0.59251	0.873446
Heilongjiang	2023	1	0.206393	0.940019	0.546464	0.989858	0.671057	0.670354	0.838317	0.902985	0.509035	0.846417	0.399845	0.32822	0.792452	0.43419	7.06388e-05	0.0564121	0.0138031	0.0578652	0.0581948	0.781597	0.645782	0.853795
Shanghai	2011	0.0205104	0.00789041	0.0138592	0.00088317	0.0118894	0.989557	0.967676	0.951627	0.994329	0.0068091	0.0172532	0.296022	0.239077	0.0541032	0	0.11883	0.0688109	0.0897735	0.0997613	0.0023753	0.208554	0.157719	0
Shanghai	2012	0.0196745	0.0117352	0.0137687	0.00141488	0.0136754	0.990934	0.970594	0.955421	0.996602	0.00739016	0.0165733	0.340325	0.227495	0.0431614	0.000951475	0.160342	0.0803861	0.0770997	0.102102	0.0023753	0.317254	0.333297	0.222366
Shanghai	2013	0.0189778	0.0120365	0.011479	0.00144807	0.0108944	0.991225	0.975466	0.954987	0.993453	0.00753305	0.0150031	0.385688	0.247576	0.0484371	0.000951475	0.137741	0.0886672	0.123745	0.43366	0.0023753	0.398962	0.544059	0.474563
Shanghai	2014	0.0176418	0.0113288	0.011479	0.00179425	0.0106775	0.992109	0.977621	0.955462	0.997218	0.0074304	0.0124852	0.436932	0.225511	0.0606007	0	0.148843	0.0956673	0.115412	0.439271	0.0023753	0.505962	0.468355	0.499237
Shanghai	2015	0.0165396	0.0118767	0.0121108	0.00188852	0.0123232	0.992442	0.979153	0.959473	0.99717	0.00583717	0.0090093	0.488949	0.199224	0.0777059	0.00126863	0.196686	0.104909	0.166485	0.455988	0.0023753	0.553231	0.502149	0.781903
Shanghai	2016	0.0135483	0.011621	0.0123562	0.00213741	0.0105882	0.993505	0.982217	0.962562	0.999349	0.00441156	0.00713355	0.548758	0.148266	0.0613846	0	0.240856	0.124033	0.182353	0.487894	0.0023753	0.586089	0.545141	0.644266
Shanghai	2017	0.0129075	0.0102466	0.0125012	0.00210196	0.00905739	0.993877	0.984598	0.967023	0.997218	0.00502351	0.00609805	0.608293	0.136516	0.0655897	0.00126863	0.335847	0.137668	0.22356	0.502831	0.00296912	0.6542	0.7725	0.687662
Shanghai	2018	0.0127315	0.00951142	0.0125012	0	0.00955491	0.994616	0.98671	0.96984	0.998354	0.00477699	0.004468	0.67416	0.133709	0.0710344	0.000951475	0.345663	0.16553	0.106836	0.522875	0.00296912	0.741255	0.781128	0.921938
Shanghai	2019	0.0113596	0.00949772	0.0125012	0.000306817	0.00855987	0.995793	0.989189	0.974843	0.998023	0.00439179	0.00265089	0.747021	0.111844	0.0835154	0.000317158	0.384821	0.191609	0.447464	0.547098	0.00296912	0.809959	0.85954	0.968745
Shanghai	2020	0.0109499	0.00950228	0.00855827	0.000614803	0.00798581	0.996691	0.989964	0.975957	0.998899	0.0039837	0.00247206	0.791353	0.146948	0.0793004	0.000634317	0.34855	0.270257	0.606832	0.53968	0.00296912	0.84645	0.956322	0.942861
Shanghai	2021	0.0115536	0.00228311	0.00855122	0.000661561	0.00831749	0.997112	0.991551	0.979633	0.994163	0.00309823	0.00107529	0.884596	0.158158	0.104185	0	0.335286	0.262159	0.239908	0.00361141	0.00356295	0.928717	1	0.941334
Shanghai	2022	0.0118707	0.000456621	0.00787871	0.000469307	0.0085216	0.997166	0.993895	0.978714	0.999088	0.00347222	0.000528777	0.915821	0.172901	0.128187	0.000317158	0.285885	0.198975	0.414335	0.00100728	0.00356295	0.977123	0.910959	0.97928
Shanghai	2023	0.0121353	0	0.00802978	0.000860112	0.00932529	0.997329	0.993895	0.978714	1	0.00315267	0	1	0.175837	0.149171	0.00158579	2.00241e-05	0.0904058	0.534122	0.00415025	0.00356295	1	0.949843	1
Jiangsu	2011	0.497822	0.444105	0.568785	0.302596	0.418298	0.532471	0.47806	0.677372	0.755703	0.407007	0.232832	0.167037	0.2391	0.0858542	0.222328	0.454729	0.169648	0.28589	0.79863	0.461995	0.139352	0.143789	0.0173231
Jiangsu	2012	0.497054	0.428712	0.585931	0.310782	0.434092	0.541268	0.495306	0.657876	0.83493	0.453456	0.236024	0.202919	0.227095	0.115433	0.229305	0.55475	0.235439	0.186317	0.843266	0.50772	0.225429	0.297241	0.218104
Jiangsu	2013	0.499162	0.415356	0.563777	0.325185	0.432994	0.547059	0.510677	0.644168	0.884748	0.481845	0.227483	0.238776	0.243635	0.153359	0.182366	0.638799	0.311159	0.235466	0.895808	0.549287	0.307202	0.429282	0.461778
Jiangsu	2014	0.498832	0.397429	0.579921	0.343615	0.441618	0.551584	0.520603	0.634596	0.868884	0.505041	0.207498	0.275909	0.232404	0.157986	0.221376	0.661585	0.337466	0.401638	0.912286	0.587886	0.411597	0.385626	0.508058
Jiangsu	2015	0.503198	0.377027	0.589425	0.356852	0.454898	0.556671	0.529339	0.655665	0.854345	0.552792	0.211401	0.309447	0.229579	0.161202	0.218839	0.741985	0.367891	0.366308	0.912914	0.62886	0.460588	0.420412	0.799588
Jiangsu	2016	0.498721	0.362941	0.605002	0.362966	0.448226	0.56717	0.541035	0.653437	0.928789	0.569401	0.195341	0.344295	0.216412	0.165376	0.224231	0.72508	0.448918	0.319506	0.929397	0.66924	0.497781	0.488788	0.671657
Jiangsu	2017	0.4908	0.34242	0.616935	0.369366	0.456952	0.579354	0.559452	0.649787	0.978607	0.563397	0.173833	0.384398	0.203458	0.171456	0.240089	0.675494	0.511735	0.593624	0.938727	0.7019	0.58195	0.639309	0.675691
Jiangsu	2018	0.488423	0.327817	0.624289	0.371349	0.463267	0.595376	0.581227	0.646663	0.910107	0.565938	0.164659	0.427979	0.197537	0.184619	0.232477	0.733212	0.61788	0.014447	0.961223	0.727435	0.66725	0.647555	0.854517
Jiangsu	2019	0.483323	0.313269	0.628217	0.378457	0.469122	0.604145	0.594682	0.652761	0.946997	0.591195	0.158459	0.475263	0.19166	0.345165	0.216936	0.759473	0.790731	0.0665172	0.969178	0.752375	0.730851	0.71187	0.884984
Jiangsu	2020	0.485674	0.299192	0.631176	0.386141	0.472043	0.611819	0.605017	0.660346	0.967881	0.627731	0.162488	0.514608	0.191737	0.438985	0.187758	0.802788	0.987372	0.551058	1	0.761283	0.775214	0.770429	0.882388
Jiangsu	2021	0.488043	0.278539	0.631171	0.381194	0.474212	0.619119	0.618178	0.679494	0.979246	0.654325	0.148667	0.581576	0.193445	0.523377	0.185538	0.813788	0.807293	0.304511	0.257189	0.76247	0.853881	0.837884	0.901853
Jiangsu	2022	0.489344	0.276712	0.573971	0.389931	0.477146	0.626733	0.633726	0.691539	0.981377	0.691238	0.147812	0.625381	0.228886	0.633325	0.166825	0.815375	0.662671	0.759486	0.268048	0.754751	0.910085	0.784248	0.968092
Jiangsu	2023	0.493006	0.273973	0.574732	0.397181	0.480794	0.63109	0.639831	0.697921	0.993065	0.707635	0.144822	0.677086	0.23127	0.732509	0.203933	7.80448e-05	0.250538	0.673657	0.302173	0.748219	0.944238	0.823542	0.969389
Zhejiang	2011	0.156034	0.235511	0.20667	0.178541	0.0960339	0.876986	0.616304	0.830608	0.898008	0.187307	0.18106	0.256239	0.17582	0.0270506	0.12052	0.27463	0.162831	0.119866	0.420515	0.0469121	0.179883	0.172165	0.0290635
Zhejiang	2012	0.146928	0.218717	0.20885	0.180664	0.0790162	0.876873	0.622287	0.818257	0.86886	0.197368	0.177712	0.297804	0.153736	0.0511535	0.131938	0.300293	0.248845	0.308862	0.431413	0.0480998	0.272375	0.384296	0.211989
Zhejiang	2013	0.146125	0.201361	0.199398	0.178612	0.0899616	0.876483	0.626413	0.810675	0.685901	0.211897	0.174444	0.34141	0.165808	0.0626519	0.216936	0.377408	0.261564	0.00378772	0.448873	0.0480998	0.357312	0.5134	0.457133
Zhejiang	2014	0.143632	0.18516	0.20185	0.175439	0.0929467	0.880433	0.647474	0.80744	0.95178	0.212483	0.162765	0.389958	0.156815	0.0741937	0.131304	0.385914	0.316603	0.0713575	0.449087	0.0480998	0.463903	0.450277	0.475436
Zhejiang	2015	0.144719	0.167881	0.202889	0.170959	0.0708263	0.883375	0.661453	0.801757	0.906981	0.219706	0.156981	0.43521	0.157614	0.0828551	0.170314	0.543708	0.389715	0.061962	0.449197	0.0480998	0.510934	0.485242	0.780262
Zhejiang	2016	0.143661	0.151434	0.20506	0.154062	0.0683769	0.887657	0.704039	0.802261	0.892112	0.236991	0.152551	0.480188	0.152261	0.0830755	0.148113	0.531444	0.411035	0.162264	0.459427	0.0480998	0.543464	0.523608	0.641521
Zhejiang	2017	0.124382	0.13663	0.204813	0.149204	0.0703287	0.890252	0.723445	0.800375	0.974677	0.232706	0.136227	0.534171	0.112041	0.0918693	0.0472566	0.512525	0.495722	0.141633	0.484621	0.0486936	0.62012	0.713662	0.671364
Zhejiang	2018	0.124223	0.117868	0.204215	0.144457	0.0727526	0.897095	0.739183	0.797695	0.960162	0.2379	0.127143	0.594791	0.112446	0.100577	0.179512	0.532954	0.549938	0.219591	0.500398	0.0486936	0.706463	0.724792	0.881048
Zhejiang	2019	0.125599	0.10247	0.19879	0.136817	0.0718596	0.904488	0.77064	0.804057	0.916311	0.253996	0.121882	0.661272	0.122329	0.120268	0.114177	0.547506	0.506611	0.219712	0.509573	0.0480998	0.775849	0.789562	0.919583
Zhejiang	2020	0.126577	0.0858447	0.200365	0.129662	0.0735945	0.908549	0.782916	0.803563	0.97309	0.265515	0.12163	0.714349	0.122367	0.145602	0.555978	0.562696	0.602827	0.290492	0.515259	0.0480998	0.818184	0.858234	0.900031
Zhejiang	2021	0.126583	0.0849315	0.200366	0.126682	0.0755336	0.910442	0.795113	0.794645	0.964803	0.272203	0.108042	0.800036	0.122379	0.173978	0.211227	0.585042	0.529258	0.327911	0.209475	0.0475059	0.891064	0.916399	0.909898
Zhejiang	2022	0.127408	0.0835616	0.171294	0.126222	0.0755463	0.912151	0.804654	0.796837	0.975197	0.286275	0.107522	0.859908	0.168386	0.204877	0.555978	0.611478	0.467631	0.405467	0.284801	0.0475059	0.946141	0.828197	0.972836
Zhejiang	2023	0.128344	0.0808219	0.173527	0.128219	0.077817	0.913885	0.816863	0.803218	0.99776	0.304622	0.101097	0.930845	0.166801	0.240545	0.0710435	5.76543e-05	0.207668	0.194973	0.284086	0.0463183	0.975496	0.867235	0.979807
Anhui	2011	0.587183	0.720959	0.527334	0.41957	0.396318	0.543066	0.288972	0.742229	0.688198	0.262484	0.500134	0.0654353	0.346237	0.134631	0.228671	0.25885	0.0671638	0.0623755	0.0564082	0.043943	0.0392613	0.0968777	0.0577009
Anhui	2012	0.583678	0.690046	0.533076	0.438101	0.44829	0.537648	0.293452	0.726093	0.727195	0.284323	0.48034	0.0916559	0.337957	0.171475	0.24548	0.316675	0.114792	0.104658	0.0621487	0.0445368	0.137974	0.26055	0.244462
Anhui	2013	0.582103	0.661963	0.643567	0.456014	0.414701	0.530793	0.287146	0.714252	0.581055	0.307162	0.463093	0.118109	0.253193	0.182382	0.333333	0.351766	0.160452	0.0420618	0.0669289	0.0451306	0.225042	0.365325	0.462098
Anhui	2014	0.582096	0.637123	0.647579	0.473025	0.432076	0.526595	0.310344	0.71019	0.848237	0.324598	0.434708	0.145658	0.250681	0.18325	0.396131	0.369801	0.164295	0.0739974	0.0714833	0.0463183	0.332774	0.331551	0.563884
Anhui	2015	0.58242	0.628402	0.658107	0.489252	0.51645	0.530385	0.328206	0.704484	0.771189	0.33818	0.422711	0.169019	0.244467	0.190857	0.446559	0.425015	0.173857	0.107168	0.0760774	0.0480998	0.365255	0.363182	0.796158
Anhui	2016	0.578684	0.622603	0.663801	0.51086	0.501729	0.546808	0.360828	0.707602	0.682515	0.359701	0.397883	0.192262	0.238507	0.215028	0.381224	0.459658	0.179165	0.113445	0.0785041	0.0486936	0.415289	0.442903	0.705192
Anhui	2017	0.567713	0.613379	0.674027	0.46903	0.509115	0.558451	0.399348	0.705576	0.905419	0.355019	0.36076	0.219071	0.225173	0.237246	0.377418	0.501649	0.232237	0.0838607	0.0833342	0.0486936	0.500972	0.600846	0.675228
Anhui	2018	0.570633	0.60895	0.679264	0.486448	0.507533	0.568181	0.431196	0.704851	0.795695	0.361098	0.331209	0.251047	0.224216	0.258175	0.312718	0.518531	0.284531	0.0913845	0.088056	0.0486936	0.584284	0.600992	0.82291
Anhui	2019	0.571346	0.60589	0.68579	0.494493	0.51349	0.587545	0.467249	0.686003	0.773249	0.400885	0.295137	0.287728	0.221102	0.265535	0.247701	0.541643	0.306401	0.16598	0.0922195	0.0492874	0.643994	0.664318	0.84917
Anhui	2020	0.573714	0.363014	0.690083	0.505733	0.509051	0.598964	0.497631	0.687394	0.706951	0.443058	0.309684	0.318838	0.220338	0.327475	0.151284	0.679961	0.378826	0.164231	0.100273	0.0492874	0.692636	0.713159	0.854015
Anhui	2021	0.578234	0.346575	0.690078	0.515145	0.517777	0.60623	0.542201	0.689609	0.929996	0.469348	0.293853	0.364084	0.223322	0.429094	0.352997	0.693392	0.362264	0.137216	0.137697	0.0492874	0.780205	0.780096	0.886473
Anhui	2022	0.581311	0.351598	0.685075	0.526143	0.519371	0.612602	0.560472	0.691539	0.907644	0.491596	0.292991	0.395166	0.228114	0.605415	0.285125	0.729686	0.380382	0.276093	0.150408	0.0492874	0.833228	0.718039	0.947639
Anhui	2023	0.588565	0.341553	0.70086	0.535527	0.525839	0.615693	0.572681	0.69473	0.993275	0.489151	0.278765	0.435701	0.224246	0.696516	0.326039	6.78536e-05	0.159537	0.00877612	0.168235	0.0475059	0.865225	0.74972	0.943929
Fujian	2011	0.144407	0.252968	0.131624	0.0872491	0.0821544	0.836424	0.650355	0.832529	0.968568	0.203244	0.346244	0.120744	0.310128	0.0218936	0.0726292	0.152929	0.0605756	0.00343799	0.132797	0.362827	0.13199	0.122536	0.0786676
Fujian	2012	0.142916	0.242466	0.131782	0.0899635	0.0661445	0.836516	0.65298	0.829728	0.962364	0.225719	0.33995	0.152054	0.304944	0.028305	0.0792896	0.179613	0.0766802	0.0456851	0.153862	0.384204	0.238452	0.264896	0.254008
Fujian	2013	0.144829	0.224201	0.155387	0.0937315	0.0810828	0.836928	0.653237	0.828254	0.934542	0.248039	0.333637	0.184113	0.2461	0.0333613	0.0916587	0.229683	0.109576	0.0250261	0.170716	0.396081	0.334646	0.371794	0.511957
Fujian	2014	0.145685	0.215982	0.154421	0.096114	0.0814145	0.83406	0.661862	0.82258	0.975789	0.267577	0.315171	0.21628	0.250734	0.0390768	0.0967333	0.235642	0.115386	0.0656231	0.181175	0.405582	0.435361	0.313711	0.550119
Fujian	2015	0.147399	0.210046	0.146067	0.0973041	0.0601105	0.832391	0.665653	0.818959	0.951946	0.283475	0.306583	0.245794	0.276816	0.0417903	0.0688233	0.325053	0.196962	0.0574707	0.187847	0.410333	0.483533	0.37995	0.819128
Fujian	2016	0.147135	0.196347	0.145104	0.0886278	0.0572147	0.832334	0.667991	0.81782	0.90852	0.319066	0.308502	0.276962	0.27867	0.0416064	0.234063	0.302041	0.295146	0.063731	0.189537	0.422209	0.513379	0.473007	0.637354
Fujian	2017	0.0960058	0.181735	0.146556	0.0858621	0.0584776	0.842902	0.687648	0.817848	0.986468	0.302115	0.257613	0.311464	0.128766	0.0467536	0.104028	0.32935	0.297067	0.182005	0.191495	0.429335	0.588578	0.650024	0.653906
Fujian	2018	0.0978439	0.173516	0.149675	0.0855491	0.0599319	0.850751	0.706108	0.825548	0.981448	0.325069	0.248498	0.349863	0.128467	0.0532818	0.0735807	0.317442	0.340577	0.00347266	0.199212	0.43171	0.66803	0.649958	0.852684
Fujian	2019	0.0992884	0.159361	0.148387	0.0862625	0.0593323	0.857039	0.728488	0.830318	0.970935	0.358159	0.228332	0.394997	0.134811	0.0580296	0.0837298	0.325202	0.345519	0.061414	0.206216	0.432304	0.729029	0.708362	0.879295
Fujian	2020	0.10139	0.138356	0.153546	0.0879573	0.0604039	0.864709	0.742613	0.851642	0.984692	0.379662	0.23217	0.428889	0.131574	0.0688073	0.0659689	0.331078	0.408611	0.0536756	0.219744	0.433492	0.768978	0.783918	0.857071
Fujian	2021	0.102744	0.128311	0.153543	0.0887359	0.0609269	0.870571	0.751612	0.869256	0.988954	0.404042	0.22111	0.489561	0.135287	0.082859	0.101808	0.269697	0.306584	0.155569	0.153303	0.432304	0.843882	0.851897	0.873182
Fujian	2022	0.104733	0.127397	0.114446	0.0907111	0.0612203	0.876987	0.761922	0.867035	0.975008	0.428559	0.215537	0.534968	0.230939	0.0957235	0.110688	0.301884	0.262021	0.131344	0.136218	0.431116	0.901045	0.797939	0.927738
Fujian	2023	0.106713	0.122831	0.114956	0.0927453	0.0615137	0.881086	0.774131	0.879798	0.980326	0.446984	0.22046	0.579799	0.236422	0.110367	0.082144	2.12012e-05	0.117216	0.182813	0.167986	0.430523	0.924631	0.824041	0.926122
Jiangxi	2011	0.354782	0.35895	0.269683	0.30968	0.258199	0.808544	0.398475	0.864769	0.745475	0.160673	0.450584	0.0737536	0.425048	0.0464334	0.167777	0.211856	0.0102484	0.0111784	0.0364689	0.38361	0.0258513	0.0953695	0.0610036
Jiangxi	2012	0.357287	0.337352	0.275724	0.339821	0.2694	0.807855	0.393127	0.856585	0.840612	0.17628	0.444938	0.0988117	0.416917	0.0594679	0.183952	0.283052	0.0140916	0.0182808	0.0401343	0.422209	0.124543	0.249874	0.247892
Jiangxi	2013	0.359104	0.320913	0.289303	0.144819	0.266275	0.80741	0.396125	0.852992	0.751678	0.19084	0.430138	0.124283	0.394001	0.0633379	0.128766	0.322607	0.018804	0.0220609	0.0432655	0.454276	0.21062	0.351177	0.475585
Jiangxi	2014	0.360286	0.301781	0.290219	0.152682	0.26977	0.805591	0.427612	0.847501	0.884748	0.202886	0.405372	0.150829	0.394139	0.0709049	0.13733	0.367936	0.0317518	0.0234356	0.0466139	0.47981	0.31592	0.318355	0.580845
Jiangxi	2015	0.360848	0.285525	0.294221	0.163424	0.281519	0.804591	0.433051	0.844772	0.892277	0.213663	0.401022	0.177243	0.387824	0.0742916	0.14621	0.409978	0.0574187	0.0121985	0.04776	0.496437	0.363554	0.348696	0.791705
Jiangxi	2016	0.359637	0.268813	0.295626	0.158959	0.281366	0.806851	0.443337	0.848665	0.813951	0.235709	0.389211	0.203041	0.383543	0.0780786	0.148113	0.42734	0.0903601	0.0559982	0.050082	0.500594	0.402144	0.428579	0.710615
Jiangxi	2017	0.364749	0.252192	0.296023	0.167103	0.279746	0.816693	0.470509	0.846266	0.895569	0.230727	0.345943	0.231563	0.390472	0.0997596	0.176023	0.447062	0.139177	0.0966056	0.0520364	0.501781	0.487666	0.593645	0.675028
Jiangxi	2018	0.359318	0.231918	0.294888	0.172561	0.275791	0.833241	0.534936	0.850385	0.874424	0.237195	0.321484	0.26303	0.384358	0.139052	0.200761	0.440956	0.165073	0.0381991	0.0540142	0.502969	0.569338	0.574991	0.823368
Jiangxi	2019	0.357042	0.214521	0.295521	0.17925	0.271556	0.843958	0.623343	0.851017	0.715782	0.264243	0.312677	0.297553	0.379852	0.158384	0.213448	0.455959	0.168459	0.0762494	0.0573849	0.501781	0.629304	0.619968	0.838216
Jiangxi	2020	0.365138	0.19863	0.295881	0.18833	0.272372	0.853456	0.684345	0.850136	0.7768	0.291837	0.32865	0.328154	0.391304	0.201864	0.130669	0.544613	0.212792	0.114679	0.0628417	0.501188	0.676256	0.687534	0.83299
Jiangxi	2021	0.367016	0.184475	0.295882	0.196197	0.275995	0.853774	0.690932	0.850455	0.900399	0.306256	0.296095	0.372157	0.394102	0.268183	0.151919	0.560758	0.182642	0.128143	0.0812638	0.498812	0.756952	0.749531	0.859786
Jiangxi	2022	0.370802	0.174886	0.315511	0.206967	0.270842	0.855013	0.694772	0.844699	0.736808	0.324605	0.286923	0.404496	0.366565	0.351866	0.164922	0.580053	0.119641	0.0897527	0.0908987	0.497625	0.799878	0.69007	0.922268
Jiangxi	2023	0.37517	0.169406	0.318626	0.215668	0.276761	0.85583	0.700877	0.844699	0.952308	0.32258	0.285643	0.44123	0.367728	0.515083	0.16746	4.96929e-05	0.0465297	0.0825136	0.0978275	0.495249	0.825754	0.721679	0.915182
Shandong	2011	0.708276	0.979406	0.748062	0.905365	0.560984	0.340735	0	0.00130824	0.498775	0.583602	0.330012	0.106355	0.273394	0.0294527	0.628925	0.414907	0.161596	0.172356	0.225447	0.0801663	0.0682552	0.0801692	0.0669697
Shandong	2012	0.708377	0.935205	0.758987	0.929622	0.610672	0.337056	0.0174407	0.00214424	0.56853	0.627175	0.322329	0.135056	0.267324	0.0826742	0.699968	0.495695	0.200073	0.174432	0.230065	0.0813539	0.168303	0.239654	0.234597
Shandong	2013	0.715571	0.892192	0.708518	0.953753	0.573984	0.342116	0.0392401	0	0.653983	0.692555	0.323327	0.165564	0.301821	0.0969493	0.740247	0.550372	0.248799	0.162236	0.232852	0.0819477	0.258405	0.361773	0.470344
Shandong	2014	0.719612	0.848676	0.735037	0.981023	0.582709	0.348549	0.0516568	0.0432645	0.790273	0.728996	0.303558	0.196442	0.287968	0.0930743	0.864573	0.568545	0.274923	0.330735	0.237167	0.0837292	0.361466	0.306449	0.535886
Shandong	2015	0.718864	0.810685	0.74462	1	0.653701	0.35499	0.0842917	0.0547291	0.673565	0.75756	0.296947	0.223518	0.281847	0.17326	0.935934	0.709483	0.32676	0.0109424	0.238294	0.0849169	0.409294	0.340104	0.819447
Shandong	2016	0.715357	0.770274	0.774791	0.73185	0.676562	0.364874	0.0987229	0.0662608	0.869334	0.739372	0.271612	0.249963	0.262864	0.194843	0.978433	0.694049	0.379741	0.0258213	0.241552	0.0866983	0.447364	0.418806	0.696753
Shandong	2017	0.724204	0.731735	0.779377	0.757979	0.68192	0.388069	0.147376	0.100923	0.797187	0.724289	0.248757	0.280019	0.265598	0.231167	1	0.701517	0.45848	0.2949	0.24136	0.0866983	0.527849	0.563892	0.665516
Shandong	2018	0.722167	0.691553	0.786268	0.778431	0.674929	0.415629	0.213232	0.133351	0.76714	0.745184	0.241828	0.310488	0.260747	0.276813	0.973042	0.734551	0.498467	0.138993	0.205375	0.0872922	0.60276	0.557795	0.811597
Shandong	2019	0.712722	0.651096	0.791693	0.798388	0.679713	0.45077	0.27147	0.164692	0.682633	0.767481	0.269811	0.348681	0.252463	0.354047	0.924199	0.791554	0.607814	0.280075	0.215181	0.0872922	0.662989	0.618688	0.837933
Shandong	2020	0.709828	0.617352	0.795096	0.819869	0.691168	0.471098	0.308286	0.169331	0.909633	0.809665	0.275027	0.37394	0.249064	0.438939	0.90961	0.78369	0.880038	0.249832	0.220018	0.087886	0.709664	0.668197	0.855333
Shandong	2021	0.713741	0.591781	0.795103	0.836568	0.698044	0.484942	0.345408	0.188415	0.974274	0.913512	0.271974	0.426657	0.251307	0.555695	0.550904	0.755481	0.89047	0.260556	0.250977	0.087886	0.787012	0.742678	0.885858
Shandong	2022	0.714763	0.577169	0.782142	0.862544	0.703543	0.497512	0.365126	0.206533	0.989309	0.967386	0.269978	0.460654	0.258608	0.685168	0.380907	0.823103	0.863751	0.743736	0.228776	0.0872922	0.840683	0.685097	0.949151
Shandong	2023	0.717298	0.569406	0.787144	0.8971	0.717767	0.507758	0.38344	0.212915	0.995968	1	0.264692	0.503694	0.257462	0.785959	0.208373	6.80331e-05	0.365787	0.0155065	0.300878	0.0872922	0.873482	0.727301	0.947503
Henan	2011	0.931281	1	0.773147	0.786016	0.703377	0.05956	0.220161	0.533223	0.650218	0.486772	0.495128	0.0700336	0.391209	0.0402255	0.253092	0.353464	0.0543075	0.0225174	0.138399	0.428147	0.0249257	0.0622105	0.11129
Henan	2012	0.931515	0.96621	0.781612	0.812936	0.748779	0.0444944	0.222957	0.521886	0.671244	0.5242	0.483312	0.095195	0.385481	0.114425	0.250872	0.405881	0.0620854	0.0209622	0.142488	0.450119	0.129084	0.181194	0.259505
Henan	2013	0.935548	0.924201	0.745337	0.833845	0.725217	0.0277141	0.212158	0.481602	0.720707	0.566394	0.478441	0.121183	0.414007	0.15079	0.281319	0.463354	0.0881182	0.0618642	0.150157	0.485154	0.221921	0.294622	0.496126
Henan	2014	0.939147	0.857078	0.765587	0.858496	0.732692	0.0145316	0.21333	0.495376	0.548972	0.594931	0.45136	0.146941	0.401243	0.110512	0.248335	0.486957	0.115615	0.050102	0.154049	0.514252	0.33484	0.249001	0.536376
Henan	2015	0.942213	0.775799	0.782381	0.876089	0.821722	0	0.220155	0.500086	0.946784	0.602423	0.430911	0.169849	0.391197	0.169973	0.229623	0.582367	0.1497	0.0727487	0.157925	0.54038	0.386456	0.286327	0.799354
Henan	2016	0.945326	0.696804	0.787331	0.736175	0.825269	0.00153187	0.230172	0.496423	0.877124	0.6153	0.4006	0.191649	0.389597	0.273832	0.287345	0.593719	0.191152	0.0598883	0.156042	0.558195	0.427667	0.381908	0.710004
Henan	2017	0.962428	0.618721	0.792041	0.750005	0.828611	0.0131965	0.269205	0.515093	0.70482	0.596022	0.350468	0.218062	0.396244	0.338088	0.32255	0.674458	0.253145	0.0986781	0.161816	0.571853	0.515496	0.541341	0.682934
Henan	2018	0.965768	0.585845	0.79435	0.762535	0.844519	0.0327413	0.312608	0.529324	0.723596	0.611907	0.336394	0.246777	0.396575	0.449383	0.360926	0.736456	0.31093	0.121952	0.162699	0.573634	0.595152	0.533769	0.813279
Henan	2019	0.961208	0.5621	0.800524	0.774038	0.850451	0.0693815	0.351507	0.535948	0.770455	0.675628	0.321632	0.281213	0.389754	0.474629	0.264193	0.77958	0.311662	0.128067	0.174277	0.57601	0.661637	0.585576	0.838628
Henan	2020	0.9595	0.549315	0.821094	0.782087	0.867086	0.0957164	0.380998	0.532901	0.841441	0.790624	0.367586	0.305604	0.375259	0.550205	0.362195	0.842625	0.39914	0.0661169	0.183918	0.575416	0.708607	0.623989	0.853872
Henan	2021	0.960627	0.526027	0.821099	0.796153	0.831163	0.128494	0.411325	0.569164	0.624078	0.834917	0.360274	0.342426	0.375882	0.624264	0.336505	0.746852	0.336277	0.289437	0.222912	0.574822	0.785681	0.705328	0.880823
Henan	2022	0.961046	0.593607	0.845656	0.811875	0.862442	0.169742	0.444485	0.570288	0.838268	0.871584	0.357911	0.372495	0.360794	0.779117	0.260387	0.816938	0.301093	0.451127	0.249867	0.573634	0.841504	0.637807	0.934674
Henan	2023	0.963388	0.549772	0.852324	0.831463	0.841381	0.185687	0.456694	0.573478	0.529468	0.818935	0.341745	0.407517	0.358039	0.973309	0.268316	6.86253e-05	0.127739	0.145384	0.281395	0.572447	0.868292	0.693169	0.927151
Hubei	2011	0.520583	0.697651	0.359864	0.262255	0.301024	0.507624	0.154372	0.80946	0.389193	0.32697	0.496884	0.0842676	0.489762	0.050849	0.0253727	0.276771	0.0461637	0.0678485	0.0539087	0.0421615	0.0714839	0.0928692	0.0481551
Hubei	2012	0.525139	0.680565	0.374162	0.282689	0.313348	0.507624	0.154372	0.80946	0.593131	0.365927	0.485934	0.111186	0.47136	0.0618709	0.286077	0.308252	0.059752	0.105328	0.0539087	0.0457245	0.172414	0.236301	0.241671
Hubei	2013	0.526933	0.656892	0.411352	0.300706	0.315414	0.511778	0.229898	0.80542	0.411001	0.400757	0.474113	0.139861	0.418296	0.0660177	0.265461	0.342328	0.0746214	0.116312	0.0628181	0.0492874	0.262129	0.377589	0.498448
Hubei	2014	0.527332	0.618397	0.421155	0.316684	0.32599	0.516927	0.236326	0.796243	0.749381	0.424517	0.439656	0.169751	0.405731	0.0638845	0.241357	0.355905	0.0914581	0.0872401	0.0688424	0.0504751	0.375931	0.335242	0.540126
Hubei	2015	0.516823	0.586396	0.427876	0.329899	0.368164	0.537162	0.269376	0.789431	0.735932	0.446931	0.424131	0.19545	0.386129	0.0617948	0.32921	0.453581	0.109256	0.0814649	0.0722656	0.0528504	0.425266	0.361793	0.80434
Hubei	2016	0.509669	0.560121	0.428861	0.308754	0.35306	0.54547	0.289423	0.802242	0.351025	0.491626	0.424198	0.218212	0.377432	0.0531523	0.225817	0.518335	0.134328	0.12627	0.0741391	0.0522565	0.459749	0.449766	0.690904
Hubei	2017	0.517071	0.537088	0.430947	0.319866	0.3594	0.559566	0.337118	0.806805	0.659808	0.479543	0.375773	0.246295	0.382628	0.0891588	0.150333	0.525796	0.183465	0.116173	0.0759874	0.0528504	0.541712	0.616788	0.689333
Hubei	2018	0.516859	0.514634	0.432899	0.326618	0.358558	0.590641	0.3754	0.814214	0.745285	0.485893	0.339698	0.27641	0.380042	0.115404	0.208056	0.577897	0.192021	0.109203	0.0802948	0.0534442	0.625507	0.626437	0.842526
Hubei	2019	0.507854	0.496458	0.438587	0.33349	0.343951	0.621459	0.413816	0.82938	0.661536	0.524428	0.312707	0.312913	0.364051	0.16082	0.43641	0.609278	0.255891	0.249697	0.0869414	0.054038	0.686272	0.678209	0.867882
Hubei	2020	0.518271	0.400457	0.456539	0.341812	0.344257	0.630687	0.437508	0.831811	0.61366	0.574975	0.358963	0.310718	0.354362	0.215812	0.34824	0.639212	0.314865	0.00901775	0.0910877	0.054038	0.720179	0.719974	0.861143
Hubei	2021	0.527134	0.393151	0.456533	0.349761	0.348965	0.637294	0.453837	0.834271	0.880273	0.655684	0.351635	0.361173	0.3631	0.295025	0.177609	0.619167	0.315505	0.0258587	0.099402	0.0528504	0.8015	0.797676	0.877454
Hubei	2022	0.532567	0.414612	0.475372	0.360861	0.346005	0.643819	0.487217	0.835127	0.721962	0.707946	0.350061	0.398643	0.348149	0.389745	0.424675	0.680363	0.353388	0.249782	0.113767	0.0522565	0.846321	0.742753	0.928196
Hubei	2023	0.540278	0.389954	0.477115	0.368165	0.350585	0.648871	0.499426	0.841508	0.915032	0.721569	0.342785	0.439551	0.353629	0.486534	0.156359	6.08029e-05	0.155557	0.154681	0.136096	0.0516627	0.872432	0.78301	0.927536
Hunan	2011	0.546372	0.757963	0.406905	0.365156	0.371302	0.66559	0.270926	0.781747	0.43778	0.347724	0.534893	0.0724361	0.445781	0.132211	0.209642	0.290035	0.0408565	0.0382653	0.0508044	0.393112	0.0287787	0.107097	0.066991
Hunan	2012	0.553595	0.752963	0.399754	0.384286	0.386929	0.656285	0.255366	0.763218	0.707921	0.379908	0.515138	0.0967709	0.464303	0.15545	0.224548	0.329376	0.0538043	0.0511397	0.0528967	0.458432	0.132227	0.249278	0.247125
Hunan	2013	0.562674	0.747037	0.456272	0.402745	0.369554	0.657574	0.24732	0.754057	0.27857	0.391247	0.477611	0.122733	0.398424	0.170567	0.238186	0.380003	0.0689939	0.0604061	0.057058	0.525534	0.218477	0.333853	0.504287
Hunan	2014	0.570196	0.744918	0.45894	0.420704	0.379199	0.658126	0.247448	0.752337	0.731078	0.412484	0.441301	0.149371	0.402654	0.197201	0.25563	0.410189	0.082445	0.116581	0.0596739	0.608076	0.319557	0.291109	0.512256
Hunan	2015	0.567076	0.730005	0.460723	0.437444	0.39105	0.659903	0.259193	0.749009	0.818923	0.43898	0.436722	0.173458	0.397499	0.232132	0.316841	0.497479	0.094066	0.00264964	0.0597138	0.684679	0.361854	0.332801	0.802572
Hunan	2016	0.57209	0.715671	0.463644	0.45279	0.385705	0.660033	0.281731	0.746808	0.674394	0.475657	0.429556	0.197686	0.398963	0.259027	0.311132	0.536844	0.100471	0.0449188	0.061104	0.763064	0.396428	0.422757	0.661587
Hunan	2017	0.541115	0.682721	0.465715	0.464653	0.388422	0.661698	0.297835	0.745116	0.711757	0.405059	0.333241	0.223657	0.36662	0.308482	0.263876	0.575593	0.135975	0.0429869	0.0620295	0.816508	0.476802	0.577334	0.663483
Hunan	2018	0.527255	0.658621	0.468496	0.470969	0.381954	0.665413	0.309239	0.744517	0.851954	0.417102	0.318637	0.253539	0.350272	0.340425	0.283857	0.680904	0.175733	0.126447	0.0631573	0.853325	0.551269	0.555214	0.79821
Hunan	2019	0.528024	0.634356	0.470352	0.481018	0.375818	0.684536	0.361781	0.749638	0.763825	0.501926	0.345974	0.287181	0.349057	0.395142	0.231526	0.719971	0.194171	0.117877	0.064232	0.87114	0.603383	0.60534	0.843532
Hunan	2020	0.546251	0.372603	0.472928	0.489853	0.380959	0.691949	0.386797	0.752149	0.806635	0.591911	0.383573	0.317917	0.363724	0.442681	0.248018	0.726617	0.264995	0.169037	0.0650832	0.877078	0.646435	0.676047	0.841058
Hunan	2021	0.553095	0.356621	0.472928	0.496448	0.388524	0.698513	0.449894	0.764628	0.896847	0.604137	0.354093	0.362108	0.370242	0.52101	0.303838	0.698148	0.222126	0.136155	0.163017	0.878266	0.725014	0.735418	0.863826
Hunan	2022	0.558831	0.349315	0.424326	0.502448	0.381329	0.702995	0.505531	0.780882	0.732594	0.644603	0.356875	0.394427	0.434949	0.593183	0.321281	0.732306	0.195407	0.227492	0.16366	0.879454	0.775391	0.687867	0.916906
Hunan	2023	0.566942	0.343836	0.430706	0.50875	0.387707	0.706558	0.548263	0.806409	0.93473	0.647795	0.348519	0.429941	0.43489	0.748163	0.288931	6.92455e-05	0.071373	0.262934	0.156077	0.877672	0.798223	0.714911	0.910889
Guangdong	2011	0.294662	0.631201	0.270525	0.175039	0.169947	0.667261	0.309684	0.876496	0.881291	0.337663	0.185326	0.119117	0.325747	0.0168403	0.280368	0.309221	0.136204	0.216707	0.563484	0.0492874	0.13227	0.147261	0.130147
Guangdong	2012	0.298446	0.61953	0.270721	0.181213	0.161617	0.661532	0.31093	0.875235	0.901299	0.359808	0.184572	0.147791	0.331551	0.0415086	0.367586	0.396926	0.155785	0.103078	0.589682	0.0498812	0.235503	0.283013	0.278554
Guangdong	2013	0.302946	0.385388	0.254819	0.186357	0.164194	0.663599	0.334054	0.870925	0.731457	0.38338	0.180281	0.175407	0.368175	0.0628891	0.334602	0.437919	0.200485	0.403036	0.613272	0.0510689	0.325821	0.400211	0.507184
Guangdong	2014	0.306027	0.416895	0.254855	0.191447	0.169475	0.65562	0.318341	0.869568	0.80062	0.406744	0.172265	0.205827	0.373393	0.0816965	0.0840469	0.410191	0.231505	0.687136	0.652716	0.0516627	0.425481	0.333932	0.52928
Guangdong	2015	0.30864	0.441553	0.254897	0.196305	0.150901	0.645959	0.311516	0.867689	0.799697	0.429979	0.169356	0.234628	0.377798	0.0879044	0.0783381	0.597279	0.28842	0.241452	0.658795	0.0516627	0.481209	0.375267	0.780305
Guangdong	2016	0.311671	0.468493	0.254966	0.173205	0.149945	0.639552	0.312309	0.871805	0.850746	0.475374	0.168369	0.26438	0.382862	0.105139	0.0678719	0.526317	0.422794	0.444058	0.66307	0.0522565	0.512534	0.455891	0.612562
Guangdong	2017	0.272019	0.49863	0.25541	0.174733	0.150506	0.643364	0.316546	0.87065	0.933169	0.466549	0.147418	0.297126	0.314039	0.126094	0.160165	0.554979	0.576337	0.672067	0.70293	0.0528504	0.58968	0.637793	0.633561
Guangdong	2018	0.275427	0.526027	0.255502	0.176179	0.14858	0.681287	0.434205	0.87401	0.870375	0.494859	0.144054	0.332982	0.319716	0.151133	0.0504282	0.66929	0.621265	0.734414	0.717043	0.0528504	0.668306	0.641293	0.835852
Guangdong	2019	0.280555	0.558447	0.255224	0.178129	0.154614	0.689059	0.472023	0.877112	0.965821	0.56459	0.14801	0.375624	0.328998	0.184064	0.0799239	0.704526	0.727364	0.569892	0.719504	0.0522565	0.727589	0.70989	0.882307
Guangdong	2020	0.286761	0.60274	0.255694	0.181119	0.158032	0.697479	0.498101	0.881209	0.980193	0.623612	0.158243	0.409854	0.338774	0.262517	0.106882	0.828213	1	0.555752	0.729184	0.0528504	0.764091	0.788978	0.855462
Guangdong	2021	0.28982	0.334703	0.2557	0.18331	0.159601	0.707214	0.533368	0.879712	0.982088	0.656448	0.147316	0.465719	0.343997	0.476396	0.207739	0.816193	0.842751	1	0.341987	0.054038	0.827438	0.855999	0.86962
Guangdong	2022	0.293442	0.320548	0.222532	0.18571	0.161081	0.713015	0.542158	0.873417	0.954053	0.704123	0.151666	0.49909	0.421188	0.808549	0.0789724	0.785365	0.749828	0.693929	0.279258	0.0546318	0.885415	0.79139	0.934321
Guangdong	2023	0.295664	0.305023	0.222527	0.187953	0.160278	0.715756	0.554367	0.876607	0.948595	0.729308	0.149653	0.538982	0.425529	1	0.044085	6.98752e-05	0.249897	0.669854	0.37876	0.0534442	0.907943	0.818016	0.940645
Guangxi	2011	0.38828	0.705479	0.217779	0.221673	0.178737	0.665279	0.601806	0.897657	0.659619	0.251404	0.665785	0.0445621	0.621555	0.00612383	0.261656	0.231623	0.0204054	0.0250525	0.0259648	0.108076	0.0387877	0.0740176	0.114528
Guangxi	2012	0.39394	0.667123	0.219627	0.233949	0.178278	0.656383	0.592313	0.890331	0.863935	0.265009	0.634893	0.0675794	0.626596	0.0107184	0.302569	0.2715	0.0421375	0.000798982	0.0295198	0.114014	0.138857	0.194113	0.276295
Guangxi	2013	0.397525	0.665753	0.226541	0.248058	0.19046	0.647022	0.584664	0.884651	0.835664	0.286509	0.617655	0.0908034	0.611058	0.0252278	0.320013	0.273583	0.0721508	0.00220394	0.0320441	0.119359	0.226032	0.291863	0.479932
Guangxi	2014	0.383906	0.652968	0.228631	0.261974	0.192068	0.642841	0.566582	0.87633	0.712941	0.302161	0.586039	0.1138	0.578594	0.0470818	0.350777	0.287848	0.075994	0.0233468	0.0359457	0.124109	0.327887	0.26436	0.522206
Guangxi	2015	0.397364	0.583105	0.231513	0.279749	0.179158	0.641181	0.548775	0.869345	0.870873	0.322435	0.580982	0.134037	0.595274	0.0605898	0.357437	0.366007	0.0861966	0.0116058	0.0397825	0.129454	0.375328	0.291109	0.85094
Guangxi	2016	0.39806	0.542009	0.235697	0.25894	0.177346	0.637971	0.48298	0.862424	0.928812	0.354485	0.581007	0.157103	0.584011	0.0857069	0.368221	0.421881	0.0694057	0.0192613	0.0454928	0.131235	0.412317	0.387841	0.751234
Guangxi	2017	0.386531	0.497717	0.239347	0.268825	0.171159	0.635596	0.563555	0.864824	0.953674	0.363211	0.591439	0.182058	0.552387	0.121773	0.398351	0.475871	0.0854646	0.0213524	0.0495595	0.131829	0.496737	0.541253	0.67942
Guangxi	2018	0.386695	0.458447	0.245023	0.2758	0.171453	0.647943	0.580531	0.866413	0.964566	0.380326	0.564308	0.210715	0.537189	0.164811	0.407548	0.483015	0.0974059	0.029805	0.0519103	0.133017	0.577824	0.527319	0.797647
Guangxi	2019	0.387801	0.425114	0.245974	0.282529	0.166248	0.652174	0.590115	0.865194	0.941409	0.428254	0.607372	0.242773	0.536621	0.188049	0.494767	0.549686	0.119779	0.0531161	0.0609891	0.133017	0.631315	0.566974	0.814867
Guangxi	2020	0.395564	0.386301	0.248727	0.287157	0.171095	0.658056	0.603045	0.861572	0.934022	0.461948	0.611096	0.272202	0.543013	0.24662	0.460514	0.665314	0.168779	0.00110157	0.0683783	0.133017	0.667323	0.608177	0.815711
Guangxi	2021	0.400178	0.375342	0.248722	0.286022	0.1732	0.652374	0.61399	0.872127	0.964092	0.511628	0.618104	0.312191	0.551129	0.360276	0.575642	0.557482	0.169511	0.0204663	0.115982	0.132423	0.733674	0.68477	0.839803
Guangxi	2022	0.406347	0.382192	0.220864	0.281415	0.174042	0.656152	0.627622	0.870226	0.911054	0.545294	0.618266	0.339827	0.646839	0.466444	0.585474	0.542228	0.159903	0.0167611	0.103604	0.132423	0.778823	0.628474	0.892162
Guangxi	2023	0.411668	0.369406	0.243293	0.283351	0.174336	0.658447	0.639831	0.876607	0.948039	0.568932	0.625645	0.371429	0.586619	0.592458	0.453536	4.436e-05	0.053301	0.0463263	0.132807	0.132423	0.794728	0.660451	0.88096
Hainan	2011	0.049278	0.0949361	0.0212054	0.0264242	0.020309	0.9393	0.720082	0.955143	0.877763	0.0627208	1	0.065177	0.514836	0.00747315	0.0396448	0.0776993	0.00654253	0.00126327	0.00149605	0.11342	0.062422	0.101164	0.136475
Hainan	2012	0.0503489	0.0904795	0.0226225	0.0290888	0.019046	0.942392	0.764138	0.948739	0.985758	0.0692078	0.953162	0.0913976	0.50316	0.014022	0.0339359	0.0909369	0.00960791	0.0023785	0.0022506	0.122328	0.166925	0.226141	0.299158
Hainan	2013	0.0499266	0.0819224	0.0232633	0.0307812	0.0206789	0.939525	0.740691	0.942552	0.961085	0.0743121	0.910304	0.116869	0.48759	0.0274658	0.0158579	0.102271	0.0141831	0.00186146	0.00277001	0.12886	0.257846	0.330618	0.5195
Hainan	2014	0.0506757	0.0801781	0.0231093	0.0319284	0.0201304	0.936869	0.762533	0.927342	0.926823	0.0830298	0.883992	0.145558	0.498862	0.0297433	0.0145893	0.10762	0.0170197	0.00323742	0.00339784	0.14133	0.363834	0.291784	0.527256
Hainan	2015	0.0497334	0.0776027	0.0237335	0.031497	0.0160354	0.934508	0.763143	0.913516	0.990328	0.0888615	0.882408	0.16997	0.477821	0.0335244	0.0215668	0.120817	0.0206799	0.00319396	0.00445919	0.1538	0.409617	0.353518	0.918378
Hainan	2016	0.0482864	0.0764612	0.0277143	0.0318725	0.0149638	0.935235	0.798379	0.931796	0.879491	0.100771	0.894528	0.195424	0.405375	0.0345969	0.0507453	0.131705	0.0196276	0.00429545	0.00489269	0.177553	0.447998	0.42384	0.671732
Hainan	2017	0.040806	0.0746712	0.0276069	0.0358872	0.0139433	0.934199	0.802163	0.928803	0.997526	0.102271	0.824277	0.222779	0.328121	0.0436052	0.0231526	0.145959	0.0282747	0.00165901	0.00570435	0.204276	0.5412	0.577009	0.642967
Hainan	2018	0.0410359	0.0717306	0.0277959	0.035587	0.0150914	0.938401	0.864174	0.935513	0.992411	0.106081	0.790391	0.250862	0.328448	0.0809759	0.0415477	0.16751	0.0335819	0.007224	0.0066464	0.217933	0.629479	0.582364	0.788298
Hainan	2019	0.0386237	0.0708447	0.0278181	0.0367494	0.0148235	0.94136	0.875723	0.919524	0.99923	0.118573	0.776987	0.279906	0.302968	0.0944503	0.0504282	0.184937	0.0543075	0.0123505	0.00728146	0.223278	0.683313	0.610589	0.805437
Hainan	2020	0.038665	0.0688539	0.0280604	0.039339	0.0148873	0.946497	0.885558	0.919428	0.990612	0.129273	0.78406	0.310019	0.300884	0.112506	0.0390105	0.197569	0.0908176	0.00462053	0.00841366	0.228622	0.718726	0.655806	0.800906
Hainan	2021	0.039185	0.0680365	0.0280594	0.0404842	0.0149511	0.949086	0.891772	0.907731	0.992506	0.145026	0.739288	0.356453	0.306306	0.142051	0.00951475	0.191792	0.0991902	0.0102365	0.0291905	0.228622	0.788918	0.734935	0.825244
Hainan	2022	0.0393432	0.069863	0.033883	0.0405629	0.0150276	0.952071	0.896222	0.905325	0.999254	0.165939	0.794129	0.383347	0.253908	0.166861	0.0202981	0.195419	0.0775038	0.0192595	0.0209595	0.227435	0.840839	0.671151	0.870326
Hainan	2023	0.0403409	0.0675799	0.0345467	0.0406606	0.0150786	0.953722	0.902327	0.898943	0.999837	0.177178	0.762043	0.424438	0.257596	0.18363	0.0247383	1.06591e-05	0.0388434	0.0245215	0.0359407	0.226247	0.854641	0.70369	0.87309
Chongqing	2011	0.218494	0.250662	0.08951	0.0789144	0.140083	0.872053	0.882036	0.891502	0.806871	0.0840994	0.317488	0.0601137	0.822316	0.013161	0.156993	0.146322	0.0355493	0.0221527	0.033036	0.241093	0.0826983	0.0807645	0.0621968
Chongqing	2012	0.22274	0.233416	0.0910574	0.080551	0.131613	0.871435	0.887188	0.88641	0.904093	0.0952124	0.309896	0.083906	0.826552	0.016691	0.17856	0.188578	0.0464382	0.0256398	0.0347448	0.263064	0.179582	0.217052	0.237516
Chongqing	2013	0.225251	0.216932	0.0867958	0.0833325	0.142788	0.870558	0.894061	0.880245	0.892277	0.104293	0.298902	0.108887	0.878539	0.0240742	0.0643831	0.207406	0.0581965	0.0450972	0.0359009	0.287411	0.265422	0.340203	0.496808
Chongqing	2014	0.226858	0.202639	0.0871148	0.0866857	0.142329	0.869692	0.893555	0.877169	0.933572	0.110896	0.279061	0.134637	0.882561	0.0205452	0.0669204	0.214523	0.094432	0.0316463	0.0369921	0.317696	0.373692	0.29988	0.545581
Chongqing	2015	0.229188	0.191918	0.0886377	0.0909386	0.130401	0.869045	0.895008	0.8729	0.983319	0.122536	0.274375	0.160855	0.877774	0.0279848	0.062163	0.243739	0.187857	0.0366252	0.0369074	0.328385	0.42081	0.327066	0.822622
Chongqing	2016	0.230827	0.182279	0.0891603	0.0923671	0.133871	0.871237	0.89864	0.872571	0.955	0.141244	0.275468	0.187827	0.879859	0.0289594	0.0596258	0.255996	0.112138	0.092176	0.0371814	0.333729	0.456472	0.406354	0.708517
Chongqing	2017	0.213662	0.174845	0.0897216	0.0949261	0.134088	0.872215	0.899476	0.871888	0.970272	0.135894	0.245514	0.215963	0.799196	0.0385104	0.0567713	0.255684	0.151393	0.00468943	0.037924	0.333135	0.532833	0.584294	0.664785
Chongqing	2018	0.214249	0.169233	0.0901326	0.100622	0.134011	0.87544	0.901161	0.874613	0.983295	0.148084	0.25319	0.245498	0.798062	0.0589954	0.0650174	0.269815	0.15487	0.00925762	0.0375986	0.335511	0.609472	0.553317	0.803635
Chongqing	2019	0.214068	0.165059	0.0902461	0.103378	0.133488	0.878377	0.905123	0.881205	0.981543	0.171285	0.245622	0.280425	0.796257	0.059196	0.0773866	0.286553	0.140321	0.100408	0.0382845	0.334917	0.66527	0.602468	0.837477
Chongqing	2020	0.21583	0.16347	0.0903443	0.105891	0.134279	0.880136	0.90718	0.883965	0.962435	0.204716	0.270317	0.312151	0.803047	0.0667779	0.0675547	0.306588	0.189596	0.0593111	0.039083	0.334323	0.704778	0.669027	0.830026
Chongqing	2021	0.218243	0.157991	0.0903412	0.108491	0.135733	0.881226	0.9082	0.885673	0.985876	0.219886	0.257892	0.357055	0.81358	0.0883601	0.0707263	0.298862	0.140504	0.100944	0.04061	0.333729	0.775485	0.727893	0.855114
Chongqing	2022	0.222828	0.168493	0.0859807	0.110991	0.133182	0.881664	0.908432	0.88618	0.912593	0.230681	0.258555	0.388392	0.875797	0.119932	0.0643831	0.289731	0.115752	0.10005	0.0419978	0.333135	0.827282	0.673753	0.908822
Chongqing	2023	0.224613	0.155708	0.0877033	0.112557	0.136129	0.882087	0.908432	0.889371	0.976871	0.237661	0.257578	0.427331	0.866654	0.144861	0.0605772	2.12395e-05	0.0520199	0.150583	0.0430662	0.331948	0.856967	0.712009	0.903711
Sichuan	2011	0.622845	0.891324	0.382112	0.25131	0.416232	0.653304	0.628171	0.626998	0.638237	0.382236	0.539386	0.0575304	0.572957	0.172139	0.49445	0.401445	0.0586082	0.0931679	0.0719998	0.0504751	0.0582461	0.102791	0.0765368
Sichuan	2012	0.628855	0.860731	0.391605	0.271517	0.413642	0.650776	0.637896	0.61232	0.776587	0.422915	0.524824	0.0814777	0.562734	0.227021	0.44085	0.481815	0.0857849	0.00310117	0.0756844	0.0516627	0.15584	0.23761	0.276423
Sichuan	2013	0.63051	0.837443	0.384533	0.291056	0.428415	0.653427	0.640112	0.609043	0.62055	0.438128	0.49274	0.105993	0.577429	0.268157	0.267999	0.545697	0.103537	0.0405858	0.0794458	0.0516627	0.241229	0.337246	0.492717
Sichuan	2014	0.629618	0.814612	0.392169	0.30667	0.426858	0.65477	0.643585	0.601357	0.782412	0.4599	0.46937	0.130967	0.562606	0.271544	0.20869	0.608087	0.104497	0.036092	0.0824654	0.054038	0.345732	0.30373	0.487539
Sichuan	2015	0.631019	0.79379	0.402715	0.325105	0.429371	0.655277	0.646473	0.595272	0.866847	0.499714	0.464059	0.154207	0.545947	0.289385	0.311449	0.681697	0.134831	0.105317	0.0850764	0.0552257	0.387705	0.336909	0.828716
Sichuan	2016	0.633561	0.771233	0.414748	0.314756	0.438977	0.656462	0.651808	0.594589	0.902861	0.536559	0.452285	0.178898	0.528951	0.306808	0.316524	0.727353	0.188498	0.0857669	0.0891972	0.0558195	0.419817	0.416293	0.698453
Sichuan	2017	0.623469	0.749543	0.423881	0.326293	0.441401	0.666346	0.665769	0.599027	0.94901	0.546678	0.436677	0.205345	0.503951	0.348598	0.447193	0.752674	0.267054	0.124782	0.0918685	0.0558195	0.494871	0.584948	0.67665
Sichuan	2018	0.626115	0.72968	0.432998	0.340139	0.442014	0.675824	0.693087	0.633511	0.885482	0.566196	0.411845	0.233877	0.493197	0.370606	0.477323	0.964367	0.241753	0.10863	0.0969394	0.0570071	0.568659	0.573635	0.803155
Sichuan	2019	0.63122	0.7121	0.436303	0.346053	0.442626	0.693299	0.723525	0.623782	0.923414	0.62259	0.389873	0.26846	0.493671	0.264376	0.422138	0.947842	0.24427	0.189493	0.100517	0.0570071	0.622619	0.620662	0.832378
Sichuan	2020	0.641532	0.694977	0.442153	0.351461	0.446313	0.710104	0.748919	0.637876	0.850202	0.730471	0.433111	0.300985	0.495791	0.329236	0.537583	0.985315	0.329414	0.223798	0.100571	0.0570071	0.664692	0.670925	0.827727
Sichuan	2021	0.651392	0.678539	0.442147	0.357485	0.453291	0.715242	0.755976	0.643779	0.9371	0.74404	0.397648	0.343511	0.505818	0.450619	0.551855	0.9785	0.313401	0.258558	0.134079	0.0558195	0.734005	0.731921	0.857462
Sichuan	2022	0.66634	0.722374	0.439623	0.364232	0.444157	0.719162	0.761922	0.650058	0.854251	0.782771	0.397484	0.371851	0.524783	0.555165	0.512211	1	0.283662	0.103557	0.144293	0.0558195	0.777619	0.686357	0.908164
Sichuan	2023	0.668775	0.691781	0.442454	0.372064	0.454783	0.722269	0.761922	0.659631	0.946109	0.792368	0.3806	0.40558	0.523023	0.640818	0.551855	9.77151e-05	0.131537	0.382347	0.161558	0.0558195	0.80441	0.721765	0.914512
Guizhou	2011	0.324183	0.536251	0.167468	0.132546	0.108191	0.874156	0.917778	0.886636	0.391514	0.0759803	0.483365	0.00570912	0.673304	0	0.107517	0.204852	0.0106144	0.0150811	0.0218851	0.122922	0.00236773	0.041176	0.0966086
Guizhou	2012	0.334807	0.533808	0.169519	0.151797	0.144523	0.868409	0.917894	0.87641	0.871725	0.0980232	0.494156	0.022759	0.690696	0.00470235	0.110688	0.266209	0.016791	0.0053964	0.0251079	0.150238	0.103125	0.165021	0.274079
Guizhou	2013	0.348428	0.529571	0.125401	0.161914	0.127722	0.869474	0.923815	0.865455	0.639611	0.116429	0.482916	0.0418497	1	0.0139123	0.127498	0.294486	0.0324839	0.0104005	0.0288103	0.178741	0.188622	0.235547	0.448205
Guizhou	2014	0.356731	0.52558	0.133826	0.178326	0.141563	0.864021	0.924151	0.860816	0.851694	0.153455	0.52508	0.0618244	0.960704	0.0413801	0.115446	0.328971	0.0500526	0.0137453	0.0334842	0.209026	0.296913	0.212964	0.573856
Guizhou	2015	0.358421	0.521251	0.146647	0.187131	0.150761	0.860658	0.922338	0.859367	0.94695	0.203872	0.59461	0.0803117	0.877437	0.0492032	0.0900729	0.393029	0.0629089	0.0174269	0.037894	0.241686	0.342288	0.249993	0.857481
Guizhou	2016	0.362012	0.509986	0.150119	0.14685	0.157611	0.860683	0.922613	0.854102	0.92178	0.233018	0.596752	0.0984831	0.865846	0.06178	0.143673	0.463005	0.0839548	0.0130836	0.0404502	0.278504	0.384743	0.349125	0.736068
Guizhou	2017	0.366124	0.368959	0.154114	0.157437	0.154818	0.871948	0.92431	0.853831	0.936792	0.258761	0.570984	0.118602	0.853035	0.0799192	0.100222	0.450256	0.0966281	0.0152383	0.0453612	0.320071	0.486055	0.499433	0.659278
Guizhou	2018	0.354149	0.340164	0.156893	0.17216	0.131511	0.880628	0.93821	0.841409	0.931014	0.27548	0.554657	0.140483	0.804632	0.11552	0.0954646	0.489095	0.102667	0.029038	0.0470063	0.35867	0.57133	0.465486	0.778643
Guizhou	2019	0.354438	0.310708	0.160228	0.180302	0.130426	0.889474	0.949882	0.876221	0.966697	0.297386	0.516648	0.167355	0.787179	0.132692	0.0910244	0.73485	0.0969026	0.0245379	0.050259	0.378266	0.625718	0.474073	0.800578
Guizhou	2020	0.35403	0.280365	0.161992	0.187675	0.131243	0.895664	0.954686	0.872105	0.944913	0.335564	0.541645	0.190244	0.776748	0.162965	0.165874	0.753543	0.11438	0.0230486	0.0563369	0.393705	0.670035	0.498953	0.795259
Guizhou	2021	0.350581	0.273059	0.161994	0.196955	0.136001	0.899601	0.96308	0.875893	0.965987	0.362663	0.529885	0.221599	0.767745	0.178738	0.197907	0.537571	0.0875692	0.0544751	0.0816598	0.415677	0.739967	0.586667	0.823983
Guizhou	2022	0.346413	0.307306	0.165011	0.20452	0.138514	0.900403	0.963373	0.892562	0.900541	0.380279	0.539388	0.243572	0.741619	0.200428	0.13955	0.509181	0.07119	0.00269726	0.0798027	0.425178	0.782993	0.524963	0.854394
Guizhou	2023	0.345416	0.287215	0.17187	0.209293	0.139165	0.901347	0.963373	0.895752	0.942607	0.383932	0.525901	0.272255	0.706294	0.242729	0.111005	4.77397e-05	0.0274512	0.0047634	0.0909013	0.422803	0.812048	0.582885	0.839821
Yunnan	2011	0.432378	0.762256	0.233882	0.191146	0.209825	0.724642	0.712127	0.725908	0.529059	0.168739	0.604069	0.0230431	0.653255	0.0577577	0.183635	0.301467	0.0250263	0.0123459	0.0312473	0.0558195	0.0118602	0.0826099	0.0686743
Yunnan	2012	0.449001	0.726027	0.240578	0.209704	0.211573	0.710955	0.668364	0.693837	0.626375	0.199121	0.611108	0.0426763	0.662164	0.0683734	0.198224	0.381512	0.0357323	0.00740322	0.0347351	0.0611639	0.109389	0.208757	0.279833
Yunnan	2013	0.463969	0.702854	0.237874	0.224478	0.229012	0.69858	0.671685	0.676842	0.708584	0.229673	0.609932	0.0631878	0.698326	0.0997744	0.276879	0.396497	0.0522487	0.0135295	0.0390151	0.0694774	0.201537	0.291288	0.514727
Yunnan	2014	0.467011	0.682772	0.245343	0.235391	0.233694	0.687554	0.656771	0.662844	0.791244	0.246525	0.591088	0.0821009	0.679222	0.107272	0.228671	0.437309	0.0680331	0.0131315	0.041382	0.0825416	0.312669	0.272932	0.528343
Yunnan	2015	0.466432	0.665941	0.252819	0.244291	0.22484	0.680516	0.648084	0.656108	0.756603	0.25626	0.574312	0.102404	0.654894	0.11604	0.228988	0.471936	0.0968111	0.0228684	0.0435395	0.0902613	0.357312	0.301686	0.843972
Yunnan	2016	0.465041	0.663945	0.260744	0.252406	0.227876	0.675295	0.648371	0.647104	0.79444	0.276586	0.56462	0.122496	0.629226	0.113808	0.243578	0.524463	0.140047	0.0420177	0.045438	0.0997625	0.394796	0.389747	0.726727
Yunnan	2017	0.440484	0.621055	0.26719	0.259488	0.231487	0.680415	0.654024	0.633626	0.903809	0.29608	0.542849	0.144256	0.570937	0.113962	0.186806	0.496431	0.197923	0.0014265	0.0489638	0.108076	0.476938	0.547878	0.657349
Yunnan	2018	0.447054	0.582329	0.274346	0.196058	0.233668	0.700888	0.68506	0.635109	0.935016	0.315262	0.531121	0.167655	0.563446	0.115342	0.308595	0.61957	0.190145	0.0206305	0.050262	0.111045	0.560345	0.539904	0.785141
Yunnan	2019	0.450214	0.566443	0.27809	0.197633	0.23488	0.719643	0.716498	0.627279	0.628601	0.38248	0.496601	0.196961	0.55923	0.160613	0.2366	0.821878	0.171432	0.0187494	0.0579738	0.111045	0.608011	0.564281	0.812169
Yunnan	2020	0.453554	0.550685	0.286614	0.20309	0.238184	0.730009	0.73234	0.629133	0.710029	0.462537	0.558174	0.221233	0.5441	0.172599	0.52902	0.809321	0.233015	0.0546847	0.0597533	0.111045	0.646822	0.600659	0.810125
Yunnan	2021	0.457994	0.532877	0.286619	0.207022	0.242572	0.743112	0.755183	0.642637	0.877195	0.497598	0.541986	0.256246	0.550915	0.188931	0.716778	0.676611	0.218557	0.0454002	0.08455	0.111045	0.717601	0.665249	0.823732
Yunnan	2022	0.462818	0.550228	0.295386	0.212661	0.246106	0.748654	0.755818	0.65644	0.80815	0.520684	0.526578	0.280778	0.538098	0.194576	0.567396	0.653576	0.218877	0.0648749	0.0805586	0.111045	0.768431	0.608809	0.869091
Yunnan	2023	0.468565	0.531507	0.295499	0.220229	0.248147	0.754344	0.768027	0.659631	0.840859	0.536837	0.532559	0.312142	0.546427	0.214823	0.597209	5.71599e-05	0.106236	0.0542035	0.10002	0.111045	0.796238	0.648399	0.859168
Shaanxi	2011	0.268965	0.366288	0.178687	0.157544	0.148733	0.715086	0.930347	0.896033	0.819539	0.148587	0.368473	0.0311547	0.493617	0.0136721	0.154456	0.245549	0.0274512	0.0443556	0.0634084	0.289786	0.0771664	0.0456012	0.136709
Shaanxi	2012	0.27273	0.372146	0.179122	0.170163	0.15654	0.669362	0.927038	0.892316	0.879586	0.168472	0.357754	0.0518471	0.501122	0.0284879	0.154773	0.276932	0.0441049	0.0451833	0.0689705	0.321259	0.175772	0.182266	0.294684
Shaanxi	2013	0.274748	0.360274	0.16881	0.177897	0.151424	0.66665	0.926758	0.886668	0.807487	0.189551	0.355333	0.0726944	0.54304	0.0512326	0.132889	0.308693	0.0480395	0.108784	0.0542825	0.354513	0.261828	0.276187	0.483618
Shaanxi	2014	0.274296	0.352055	0.171348	0.185395	0.149128	0.682876	0.928009	0.884651	0.817242	0.204128	0.333335	0.0943996	0.532409	0.0540192	0.200127	0.328077	0.053484	0.00535441	0.0522944	0.388361	0.368698	0.262415	0.557023
Shaanxi	2015	0.275764	0.353881	0.172924	0.194079	0.150008	0.680407	0.926184	0.879581	0.823848	0.209955	0.334047	0.113947	0.530246	0.0513294	0.107517	0.382965	0.0501899	0.00929158	0.0529023	0.415677	0.415343	0.300019	0.818787
Shaanxi	2016	0.275267	0.357534	0.175166	0.156718	0.157573	0.678849	0.925585	0.87751	0.850226	0.22396	0.328895	0.132225	0.520952	0.0619846	0.0922931	0.399679	0.0674383	0.0917836	0.0571078	0.43171	0.450329	0.389165	0.703184
Shaanxi	2017	0.261266	0.358447	0.176961	0.162043	0.148669	0.680122	0.9247	0.876754	0.845916	0.231427	0.298847	0.15465	0.480924	0.0718865	0.171583	0.401225	0.0826737	0.048346	0.0631698	0.437055	0.526329	0.534277	0.660295
Shaanxi	2018	0.263049	0.357991	0.178786	0.167268	0.152726	0.683644	0.929492	0.876138	0.909539	0.244626	0.280981	0.179148	0.479175	0.107932	0.253092	0.461096	0.0844581	0.0885922	0.0645446	0.43943	0.60074	0.536556	0.792069
Shaanxi	2019	0.265748	0.357534	0.180345	0.168754	0.153376	0.721762	0.931385	0.874119	0.847337	0.268756	0.289844	0.207896	0.480489	0.138172	0.521408	0.503317	0.113419	0.0925365	0.0666457	0.438836	0.6592	0.600047	0.828405
Shaanxi	2020	0.267638	0.279452	0.188266	0.173013	0.158951	0.722624	0.933149	0.874297	0.874117	0.311012	0.32617	0.233492	0.459967	0.175531	0.523945	0.54604	0.161642	0.136581	0.0611351	0.438836	0.705093	0.644866	0.840648
Shaanxi	2021	0.269506	0.269863	0.188265	0.176275	0.15839	0.724318	0.935029	0.875669	0.769697	0.331891	0.303965	0.27039	0.464218	0.21472	0.472566	0.510733	0.152994	0.19765	0.0748518	0.438242	0.779537	0.723225	0.863153
Shaanxi	2022	0.271016	0.287215	0.1614	0.179493	0.161898	0.733507	0.938954	0.870226	0.869073	0.355344	0.295214	0.295178	0.562595	0.252592	0.459562	0.539391	0.164066	0.00863379	0.0761631	0.437648	0.824342	0.666782	0.919873
Shaanxi	2023	0.272837	0.273516	0.164402	0.18303	0.165189	0.734194	0.938954	0.857462	0.877479	0.36534	0.294628	0.328442	0.555278	0.297747	0.493181	4.61661e-05	0.0674383	0.0976189	0.0887089	0.437648	0.855559	0.725571	0.921746
Gansu	2011	0.263295	0.37661	0.181367	0.154046	0.125757	0.883774	0.588473	0.557559	0.700179	0.077793	0.513575	0	0.471401	0.0142949	0.0463051	0.174829	0.0183465	0.00398851	0.0204212	0.286817	0.00652202	0.0119063	0.144956
Gansu	2012	0.263629	0.365714	0.18225	0.164801	0.136142	0.876901	0.555906	0.537186	0.759397	0.0916459	0.524904	0.016869	0.469373	0.0352997	0.0589914	0.222436	0.0218237	0.013725	0.0218143	0.31829	0.113565	0.123468	0.326454
Gansu	2013	0.267316	0.356716	0.18018	0.175313	0.141614	0.873276	0.531414	0.487993	0.696319	0.104619	0.527871	0.0338672	0.484739	0.054548	0.0643831	0.254959	0.0339937	0.0107596	0.0230651	0.35095	0.204077	0.213202	0.534863
Gansu	2014	0.270048	0.348021	0.182171	0.184911	0.14414	0.869214	0.530975	0.454878	0.61688	0.112834	0.500278	0.0516299	0.484672	0.0647772	0.0672376	0.269371	0.0438761	0.0162321	0.0235135	0.387767	0.314564	0.19949	0.60944
Gansu	2015	0.272139	0.341567	0.183652	0.195412	0.143617	0.868764	0.524772	0.430737	0.760652	0.121231	0.534048	0.0686698	0.484758	0.0739456	0.0713606	0.365654	0.0523402	0.0126756	0.0248988	0.425178	0.360993	0.23513	0.909962
Gansu	2016	0.27375	0.333525	0.185307	0.136505	0.138884	0.875089	0.579304	0.394498	0.682018	0.125776	0.518881	0.0821197	0.483179	0.0813565	0.0748493	0.35907	0.0643272	0.0199883	0.0249885	0.450119	0.403213	0.329202	0.644891
Gansu	2017	0.24077	0.32579	0.187442	0.145155	0.137404	0.887639	0.688698	0.467581	0.817029	0.108025	0.436635	0.0981158	0.401124	0.0893753	0.0773866	0.383121	0.112092	0.0204297	0.025803	0.471496	0.485222	0.463603	0.631813
Gansu	2018	0.242185	0.319928	0.188379	0.151506	0.143209	0.889494	0.744439	0.502412	0.819136	0.116131	0.423046	0.116924	0.401767	0.111878	0.0650174	0.499032	0.13172	0.0238005	0.0274076	0.494062	0.558202	0.438063	0.743547
Gansu	2019	0.245998	0.313466	0.187047	0.156877	0.144638	0.892712	0.750092	0.53119	0.958978	0.134684	0.456851	0.138231	0.414176	0.162942	0.0973676	0.527287	0.143341	0.00978162	0.0287126	0.499406	0.614213	0.486139	0.757648
Gansu	2020	0.252587	0.26347	0.188541	0.165589	0.149689	0.893448	0.760018	0.528947	0.906318	0.152246	0.504631	0.156712	0.424948	0.186956	0.110371	0.570744	0.189001	0.0331555	0.0307494	0.500594	0.660617	0.513134	0.766596
Gansu	2021	0.256932	0.255708	0.188541	0.172778	0.153427	0.898089	0.834524	0.47224	0.870328	0.179555	0.505975	0.184831	0.434816	0.223357	0.121154	0.542209	0.154001	0.0587542	0.0547785	0.500594	0.737009	0.599038	0.81422
Gansu	2022	0.261138	0.271233	0.190211	0.18272	0.157701	0.897986	0.841281	0.449036	0.884558	0.199163	0.513869	0.20375	0.43948	0.243455	0.162385	0.552855	0.150707	0.0214494	0.0522444	0.500594	0.772969	0.545074	0.854905
Gansu	2023	0.266242	0.258904	0.201593	0.191921	0.158708	0.898713	0.847386	0.417128	0.911229	0.219239	0.525709	0.228701	0.419025	0.2625	0.17412	4.67635e-05	0.0578762	0.0392085	0.0656882	0.499406	0.802294	0.610008	0.859263
Qinghai	2011	0.0301781	0.0464932	0.0218434	0.0253957	0.00951664	0.994757	0.993926	0.999754	0.932483	0	0.3502	0.0136399	0.27291	0.00476957	0.0222011	0.0770445	0	0.00271137	0	0.0730404	0	0	0.182904
Qinghai	2012	0.030604	0.0434201	0.0218434	0.0257198	0.00929977	0.993309	0.995086	1	0.963406	0.00268615	0.352476	0.0339964	0.278055	0.00666553	0.0177609	0.098795	0.000686279	0.00356995	0.000193633	0.0825416	0.097206	0.0894759	0.252964
Qinghai	2013	0.0307068	0.0441096	0.0119092	0.0238788	0.00938907	0.992606	0.993914	0.996353	0.959546	0.00646148	0.369433	0.0564195	0.432231	0.0102687	0.0193467	0.11747	0.00274512	0.00260184	0.000213813	0.0938242	0.185587	0.211655	0.462886
Qinghai	2014	0.0305705	0.0439269	0.0112342	0.0261655	0.00969524	0.992691	0.994591	0.994521	0.959878	0.00785889	0.353707	0.0776214	0.44429	0.0118048	0.0190295	0.139798	0.0046667	0.00220066	0.000443024	0.110451	0.295493	0.201693	0.487198
Qinghai	2015	0.0308787	0.0434201	0.0134571	0.0271437	0.00959318	0.992143	0.994164	0.993465	0.947873	0.00719015	0.325525	0.0944307	0.40444	0.0184693	0.0126863	0.150369	0.00979091	0.00264425	0.000916393	0.127672	0.339296	0.257454	0.876935
Qinghai	2016	0.0310717	0.0434521	0.0142794	0.0274974	0.00969524	0.994068	0.994268	0.991656	0.968189	0.008778	0.323762	0.113313	0.392331	0.0256716	0.0161751	0.170923	0.00544448	0.00210909	0.000931341	0.147268	0.378345	0.348269	0.640347
Qinghai	2017	0.0306765	0.0432831	0.0149328	0.0277833	0.00940183	0.994195	0.994659	0.99015	0.935584	0.0108347	0.342451	0.133927	0.375087	0.0310076	0.0123692	0.171489	0.0164707	0.00250736	0.00116818	0.163895	0.460017	0.484851	0.626107
Qinghai	2018	0.030804	0.0411598	0.0160723	0.0285179	0.00947837	0.994686	0.995214	0.775905	0.987794	0.0142357	0.353024	0.157978	0.358254	0.0488048	0.0168094	0.197042	0.0183008	0.00528475	0.00123604	0.17399	0.537538	0.453537	0.732668
Qinghai	2019	0.030804	0.0411598	0.0160723	0.0285179	0.00947837	0.994686	0.995214	0.775905	0.987794	0.0142357	0.353024	0.157978	0.358254	0.0779254	0.0168094	0.197042	0.0264446	3.14284e-05	0.00123604	0.185273	0.583187	0.48813	0.770498
Qinghai	2020	0.0317351	0.0232877	0.0168709	0.0299752	0.0100269	0.99872	0.998578	0.993462	0.989901	0.0224601	0.421071	0.20833	0.358812	0.0909668	0.0345703	0.205831	0.0385689	0.000266825	0.00170856	0.203682	0.624441	0.511786	0.792645
Qinghai	2021	0.0325531	0.0223744	0.0168636	0.030119	0.0102438	0.999513	0.999579	0.994161	0.989428	0.024202	0.398608	0.240925	0.370269	0.0969759	0.0285442	0.184681	0.024523	0.0055233	0.00518523	0.214371	0.696449	0.582549	0.832039
Qinghai	2022	0.0327058	0.0237443	0.0172952	0.0308695	0.0100142	0.999761	1	0.994668	0.978086	0.0272655	0.398323	0.262936	0.365614	0.105998	0.012052	0.202396	0.0285035	0.00272855	0.00522246	0.214371	0.729395	0.503652	0.876518
Qinghai	2023	0.0335345	0.0228311	0.0173084	0.0319671	0.0111495	1	1	0.991477	0.990373	0.0280285	0.38502	0.292844	0.376754	0.126872	0.0253727	1.06238e-05	0.00933339	0.00476189	0.00664167	0.211995	0.765423	0.586368	0.875405
Ningxia	2011	0.0770153	0.0656621	0.0564918	0.0508905	0.0421233	0.952637	0.989671	0.968363	0.897155	0.0100692	0.329974	0.0427021	0.365361	0.00454616	0.0313987	0.0825252	0.00205884	0.00213178	0.00395542	0	0.0652417	0.0325439	0.0753862
Ningxia	2012	0.0757529	0.0618721	0.0586022	0.0522896	0.0441644	0.950951	0.989378	0.968242	0.938449	0.0125461	0.320614	0.0645311	0.342781	0.0131818	0.0355217	0.102836	0.00439219	0.00374824	0.004325	0	0.161049	0.165855	0.229866
Ningxia	2013	0.0772954	0.0581279	0.0597079	0.0533982	0.0439602	0.949546	0.989628	0.96395	0.928741	0.016192	0.325787	0.0857918	0.344888	0.0222573	0.0409134	0.109887	0.00905888	0.00488917	0.00486778	0.00118765	0.243489	0.242611	0.457559
Ningxia	2014	0.0765403	0.0522831	0.0597616	0.0542309	0.0445343	0.95063	0.990318	0.968245	0.896303	0.0174498	0.296234	0.106743	0.339931	0.0284504	0.0488424	0.115525	0.00796084	0	0.00472826	0.00178147	0.355633	0.213361	0.519841
Ningxia	2015	0.0772943	0.0481735	0.0609303	0.0556065	0.0438582	0.95004	0.990275	0.967093	0.948276	0.0205024	0.30707	0.12505	0.336907	0.0303918	0.0593086	0.12231	0.00919614	0.00262622	0.00484286	0.00178147	0.405506	0.25422	0.921766
Ningxia	2016	0.0779912	0.0445662	0.0622523	0.0366972	0.0436158	0.949152	0.990312	0.968704	0.907644	0.0213628	0.286219	0.143984	0.332672	0.0370583	0.052014	0.148073	0.0187583	0.00239841	0.00502723	0.00178147	0.439014	0.343019	0.608406
Ningxia	2017	0.0686186	0.0394064	0.0616848	0.0385706	0.0435393	0.949041	0.990599	0.968864	0.958789	0.0232986	0.27284	0.166879	0.280535	0.050936	0.0415477	0.163595	0.0316146	0.00910086	0.00526038	0.00178147	0.517577	0.487063	0.634241
Ningxia	2018	0.0707178	0.0357534	0.0635247	0.0398151	0.0464096	0.952448	0.992272	0.969221	0.965016	0.0280427	0.283446	0.191931	0.282585	0.0669114	0.0428164	0.161147	0.0419088	0.00737398	0.00547185	0.00178147	0.586103	0.433617	0.740565
Ningxia	2019	0.0699548	0.0322374	0.0658005	0.0405899	0.0439347	0.952359	0.9924	0.967227	0.993193	0.0287802	0.280163	0.221658	0.266021	0.0798994	0.122106	0.160482	0.0514709	0.0115722	0.00600167	0.00178147	0.639467	0.465909	0.755928
Ningxia	2020	0.0713525	0.0287671	0.0679852	0.04149	0.044866	0.952896	0.992833	0.964713	0.958647	0.0383912	0.324657	0.248292	0.262678	0.0806141	0.134792	0.186446	0.0677129	0.00927706	0.00636651	0.00178147	0.685546	0.507928	0.754153
Ningxia	2021	0.0714631	0.0278539	0.0679805	0.0422242	0.0433224	0.953739	0.99265	0.959703	0.911054	0.0430032	0.303003	0.285678	0.263311	0.0865867	0.15509	0.178297	0.0701835	0.0165276	0.0182143	0.00178147	0.760508	0.592398	0.798656
Ningxia	2022	0.0723556	0.03379	0.0692186	0.0429487	0.0442664	0.954554	0.993895	0.949996	0.98384	0.050004	0.302158	0.313932	0.262027	0.110795	0.0865842	0.18014	0.0782816	0.018727	0.0145874	0.00178147	0.8235	0.538696	0.850928
Ningxia	2023	0.0729871	0.0292237	0.0697442	0.0436838	0.0446491	0.954831	0.993895	0.927661	0.961351	0.0532377	0.302792	0.348592	0.262854	0.134594	0.0685062	1.08563e-05	0.0265819	0.0217345	0.0237826	0.00178147	0.857116	0.602647	0.83811
Xinjiang	2011	0.321703	0.265283	0.579006	0.128419	0.15256	0.748239	0.888042	0.433155	0.839476	0.140197	0.656732	0.0406872	0.0943753	0.148515	0.222011	0.218918	0.0215949	0.00274096	0.0336732	0.0332542	0.0235912	0.033417	0.066778
Xinjiang	2012	0.330932	0.2681	0.601168	0.14141	0.189899	0.735562	0.884941	0.417906	0.733517	0.166234	0.670745	0.0671144	0.092146	0.188028	0.388836	0.268799	0.0269936	0.0124148	0.0357454	0.0374109	0.126824	0.155536	0.30082
Xinjiang	2013	0.336739	0.25653	0.714784	0.156262	0.171988	0.720776	0.876169	0.357568	0.86635	0.187631	0.66279	0.0921984	0.0563811	0.257835	0.347288	0.285	0.0399414	0.0214559	0.0397875	0.0385986	0.214129	0.27708	0.572961
Xinjiang	2014	0.356809	0.253014	0.724293	0.169529	0.176772	0.673332	0.820288	0.178068	0.562373	0.204306	0.632035	0.11485	0.0662074	0.312494	0.258484	0.351103	0.0414055	0.00730462	0.0460658	0.0409739	0.321408	0.25422	0.531262
Xinjiang	2015	0.372557	0.250936	0.741628	0.180658	0.238107	0.657714	0.848375	0.158986	0.772775	0.209217	0.636982	0.132965	0.0706746	0.344398	0.154456	0.44532	0.0602095	0.0132186	0.0498279	0.0433492	0.366029	0.281465	0.877489
Xinjiang	2016	0.379804	0.252909	0.747319	0.185396	0.194351	0.654739	0.837643	0.167611	0.808766	0.222653	0.651198	0.152549	0.0733643	0.355172	0.170948	0.527479	0.0679416	0.0129153	0.0518658	0.0445368	0.405449	0.363838	0.630121
Xinjiang	2017	0.381082	0.240466	0.742758	0.191935	0.185728	0.653994	0.837191	0.210853	0.932009	0.251667	0.542144	0.17482	0.0755619	0.39256	0.274342	0.450579	0.0666606	0.0162522	0.0533471	0.0451306	0.48831	0.480894	0.651973
Xinjiang	2018	0.393038	0.237269	0.732202	0.198945	0.188215	0.648021	0.861231	0.155993	0.823446	0.276965	0.527101	0.198825	0.0863535	0.477426	0.41294	0.55413	0.0543075	0.0141832	0.0575387	0.0457245	0.571249	0.448822	0.745318
Xinjiang	2019	0.399683	0.214228	0.743924	0.203258	0.191137	0.644124	0.866017	0.178846	0.864503	0.294269	0.49753	0.228459	0.0866002	0.658573	0.443704	0.719042	0.0666148	0.0111625	0.0601698	0.0457245	0.627498	0.495201	0.764347
Xinjiang	2020	0.406913	0.200913	0.733719	0.213852	0.198319	0.657526	0.872885	0.188428	0.849018	0.332067	0.54596	0.252598	0.0944727	0.775821	0.354266	0.829736	0.11987	0.0149484	0.0615051	0.0457245	0.663519	0.530017	0.761325
Xinjiang	2021	0.413973	0.19863	0.733726	0.218862	0.21776	0.668123	0.881645	0.182669	0.836232	0.399339	0.560657	0.291844	0.098856	0.693613	0.401522	0.62498	0.111863	0.0130206	0.132468	0.0451306	0.740376	0.608078	0.793523
Xinjiang	2022	0.42092	0.210502	0.985443	0.224857	0.227672	0.663913	0.884013	0.126762	0.943919	0.425834	0.537638	0.317022	0.0365787	0.737945	0.283857	0.698943	0.11438	0.0143005	0.106954	0.0451306	0.780266	0.519775	0.847052
Xinjiang	2023	0.443706	0.194521	1	0.232829	0.26667	0.658324	0.890118	0.0182739	0.9023	0.440407	0.545112	0.353139	0.0441858	0.794306	0.283222	8.7554e-05	0.0579219	0.0361438	0.153984	0.043943	0.817223	0.57981	0.84572
translation
Beijing	2011	0.0141664	0.0174744	0.0154499	0.013014	0.0119639	0.987029	0.982177	0.974768	0.9869	0.0108567	0.0245887	0.244585	0.126961	0.0405904	0.0203981	0.137911	0.11265	0.00394819	0.020694	0.0862045	0.205813	0.130018	0.0533903
Beijing	2012	0.0128609	0.0166845	0.0151754	0.0111966	0.0109434	0.987268	0.982525	0.977062	0.983324	0.0135048	0.02465	0.286512	0.110327	0.0486774	0.024204	0.163919	0.125735	0.0310332	0.0216464	0.0903613	0.330721	0.303036	0.23638
Beijing	2013	0.0102149	0.0162644	0.0068139	0.00867905	0.00868539	0.988517	0.982617	0.977678	0.993814	0.0156242	0.0237713	0.331358	0.154735	0.0531702	0.00612601	0.219039	0.16014	0.220225	0.0222532	0.0903613	0.413161	0.477821	0.473107
Beijing	2014	0.00716863	0.0148945	0.00529404	0.00777702	0.00457767	0.990121	0.98421	0.982314	0.987563	0.0154847	0.0209969	0.376987	0.111942	0.0426475	0.0102491	0.252916	0.166866	0.125308	0.0232647	0.0927366	0.520914	0.423032	0.485146
Beijing	2015	0.00569818	0.0139356	0.00441065	0.00704469	0.00441183	0.991683	0.986829	0.983913	0.998715	0.0112712	0.0157467	0.42094	0.090875	0.0547508	0.00517453	0.312588	0.194088	0.281336	0.0238178	0.0945181	0.573586	0.451369	0.792529
Beijing	2016	0.00422818	0.013616	0.00304876	0.00390721	0.00316165	0.992913	0.987702	0.98562	0.991967	0.00881831	0.0117514	0.46591	0.0735562	0.0573279	0.00517453	0.326396	0.213533	0.238227	0.0253326	0.0951119	0.610735	0.510044	0.68688
Beijing	2017	0.00222866	0.013068	0.00105639	0.00308211	0.0016691	0.994464	0.989564	0.988473	0.998596	0.00640015	0.00882855	0.515793	0.0473971	0.0611455	0.0077118	0.381421	0.240618	0.351209	0.0287198	0.0951119	0.67632	0.695582	0.678616
Beijing	2018	0.00110153	0.0116982	0.000165794	0.00248959	0.000776115	0.996229	0.990491	0.990802	0.99907	0.00546137	0.00734819	0.573913	0.027231	0.0748325	0.00295442	0.423866	0.242265	0.758135	0.0305282	0.0951119	0.757573	0.714522	0.87927
Beijing	2019	0.0001	0.0103283	0.0001	0.00227755	0.0001	0.997804	0.992427	0.992538	0.999591	0.00423669	0.00464698	0.636897	0.0001	0.0786461	0.00263727	0.43018	0.268115	0.00813477	0.0318388	0.0951119	0.823846	0.784547	0.923243
Beijing	2020	0.000733097	0.00982603	0.00011641	0.00207979	0.000316867	0.997959	0.993086	0.992975	0.999709	0.00275128	0.00374639	0.667825	0.017544	0.0962298	0.0159579	0.36596	0.309292	0.16836	0.0326248	0.0951119	0.85042	0.87139	0.913006
Beijing	2021	0.00202544	0.00329635	0.000124078	0.00215713	0.00124812	0.997629	0.991957	0.994213	0.996631	0.00324566	0.00291025	0.749899	0.0533776	0.126998	0.0153236	0.366355	0.275664	0.135739	0.0313969	0.0945181	0.927747	0.927876	0.909444
Beijing	2022	0.003732	0.00238311	0.000543534	0.0021494	0.00221764	0.997191	0.993995	0.994768	0.998005	0.00313687	0.00258517	0.787386	0.094398	0.147787	0.00263727	0.34055	0.233938	0.386508	0.028281	0.0939242	0.977256	0.870924	0.955092
Beijing	2023	0.00472867	0.00192648	0.00144302	0.00236067	0.00252381	0.996993	0.993995	0.994768	0.996619	0.00187067	0.00154869	0.85466	0.10734	0.174814	0.0039059	0.000128587	0.0933424	0.319081	0.0344462	0.0939242	0.999529	0.897622	0.970995
Tianjin	2011	0.0250368	0.0206479	0.0351835	0.0370483	0.0170667	0.972202	0.983032	0.977002	0.998265	0.0097468	0.0467284	0.198059	0.11479	0.00368138	0.026107	0.0676103	0.0368388	0.0412825	0.0236319	0.00306912	0.145199	0.0925128	0.0792364
Tianjin	2012	0.0257591	0.0188215	0.0350363	0.0358612	0.0172963	0.972118	0.982958	0.977534	0.968549	0.0118717	0.0435784	0.240735	0.122094	0.00724793	0.0184952	0.0743759	0.0463095	0.0464345	0.0237907	0.00366295	0.233967	0.256106	0.283193
Tianjin	2013	0.0254003	0.0165384	0.030716	0.0348091	0.0187123	0.972272	0.98399	0.975939	0.998336	0.0148585	0.042576	0.286202	0.14446	0.0143632	0.0112005	0.0905986	0.0673553	0.0708292	0.0325627	0.00366295	0.311306	0.378641	0.47332
Tianjin	2014	0.0257628	0.0165384	0.030716	0.0346696	0.0188781	0.973776	0.983972	0.97794	0.997744	0.0172444	0.0412722	0.329115	0.148029	0.0174662	0.00802896	0.0993388	0.0729828	0.0771289	0.0524043	0.00366295	0.413161	0.34443	0.531788
Tianjin	2015	0.0251054	0.0151685	0.0307161	0.0342616	0.0199625	0.97587	0.984668	0.983434	0.997057	0.0193356	0.0409477	0.367024	0.141556	0.0233607	0.00454022	0.114914	0.0960418	0.0860868	0.0491157	0.00425677	0.45197	0.374553	0.833312
Tianjin	2016	0.0257722	0.0142553	0.0303709	0.0284595	0.0219908	0.976463	0.986017	0.97995	0.9945	0.0215309	0.0397379	0.408202	0.150395	0.026944	0.00993191	0.118548	0.125689	0.0399728	0.0440083	0.00425677	0.481076	0.446298	0.706589
Tianjin	2017	0.0231663	0.0128854	0.0303709	0.0280568	0.0235089	0.981168	0.991841	0.982305	0.997057	0.0123954	0.0273806	0.451551	0.124556	0.0359711	0.00707748	0.116593	0.130768	0.137705	0.0181623	0.00425677	0.551014	0.602109	0.671982
Tianjin	2018	0.022493	0.0115155	0.0300703	0.0192575	0.0231772	0.982661	0.992836	0.988163	0.996773	0.0130811	0.0276631	0.485433	0.11968	0.0472243	0.0115177	0.121996	0.153643	0.179697	0.0164654	0.00425677	0.631611	0.617598	0.806644
Tianjin	2019	0.0212441	0.0106023	0.0300915	0.0201518	0.0249122	0.983657	0.992952	0.991271	0.997057	0.0150203	0.0429006	0.530353	0.107094	0.048545	0.0216668	0.11891	0.15282	0.0581252	0.0176217	0.00425677	0.692976	0.679261	0.84075
Tianjin	2020	0.021829	0.00740594	0.0292208	0.0205475	0.0255372	0.984995	0.994014	0.993106	0.996158	0.0200677	0.0498068	0.553255	0.118144	0.0582373	0.0178609	0.113987	0.176062	0.0892132	0.0185068	0.00425677	0.728349	0.728661	0.85487
Tianjin	2021	0.0230009	0.00649269	0.0292176	0.0211055	0.0283055	0.984474	0.99557	0.994325	0.998762	0.0227353	0.0476379	0.611738	0.130076	0.0603933	0.012152	0.108976	0.126558	0.145274	0.0289849	0.00425677	0.817581	0.789483	0.891483
Tianjin	2022	0.0234287	0.00603607	0.0284316	0.0209761	0.0291092	0.984664	0.993995	0.994768	0.99907	0.0237253	0.0568237	0.639205	0.13959	0.0625868	0.00454022	0.0812328	0.101669	0.145634	0.0242179	0.00425677	0.872395	0.736631	0.966296
Tianjin	2023	0.0240587	0.00557945	0.0307359	0.0208277	0.0290454	0.984783	0.993995	0.997959	0.993967	0.0229013	0.0541202	0.686563	0.131131	0.0714952	0.018178	0.0001	0.0404075	0.0983533	0.0333998	0.00366295	0.907549	0.773774	0.982148
Hebei	2011	0.570902	0.66905	0.688308	0.773551	0.401151	0.547933	0.49949	0.622127	0.672647	0.37934	0.449368	0.0752485	0.219529	0.0731787	0.514531	0.269419	0.0278714	0.028713	0.276719	0.342143	0.0356159	0.0743755	0.105722
Hebei	2012	0.571434	0.638456	0.6893	0.788983	0.435595	0.543645	0.488349	0.612057	0.685504	0.415453	0.454717	0.100332	0.219345	0.125128	0.483766	0.326449	0.0346427	0.0620378	0.294021	0.375991	0.136783	0.201297	0.269257
Hebei	2013	0.569294	0.618821	0.650338	0.804739	0.425695	0.541242	0.476817	0.583132	0.738187	0.455517	0.466889	0.126941	0.240116	0.164362	0.337874	0.376097	0.04695	0.0523585	0.305198	0.405088	0.223312	0.309843	0.500338
Hebei	2014	0.566919	0.601926	0.658803	0.818325	0.425083	0.534819	0.479204	0.577031	0.660239	0.468675	0.444166	0.152726	0.233439	0.174974	0.264293	0.429367	0.0567409	0.045965	0.312653	0.437748	0.318689	0.247315	0.51634
Hebei	2015	0.568677	0.580922	0.665513	0.830389	0.455955	0.534985	0.497524	0.576824	0.574265	0.467381	0.437293	0.175055	0.230752	0.215672	0.284274	0.524247	0.0792966	0.0918778	0.302931	0.45972	0.367787	0.287221	0.783409
Hebei	2016	0.567153	0.53252	0.666996	0.551271	0.479019	0.540191	0.507517	0.575384	0.657517	0.475915	0.412287	0.1975	0.228861	0.224088	0.281102	0.589206	0.0932052	0.00169604	0.29743	0.471596	0.408188	0.37736	0.668902
Hebei	2017	0.545137	0.486858	0.669607	0.564742	0.484913	0.553952	0.53235	0.608359	0.830176	0.418158	0.347123	0.222341	0.212415	0.252591	0.243995	0.576055	0.139186	0.0136661	0.304593	0.475753	0.497177	0.529317	0.65272
Hebei	2018	0.53301	0.439369	0.672316	0.574216	0.468546	0.567444	0.631079	0.666645	0.868297	0.445279	0.349752	0.252048	0.202736	0.301931	0.223697	0.666801	0.170572	0.0950092	0.249783	0.476347	0.564269	0.518352	0.775633
Hebei	2019	0.528775	0.419278	0.670756	0.583607	0.473432	0.588703	0.656145	0.687775	0.925669	0.474094	0.3788	0.28672	0.200691	0.358917	0.142187	0.719769	0.231971	0.0540287	0.247995	0.476941	0.608019	0.576705	0.809369
Hebei	2020	0.525932	0.363114	0.668895	0.59379	0.480665	0.604953	0.674794	0.686081	0.912338	0.529458	0.405558	0.314981	0.199742	0.486617	0.175171	0.727475	0.304488	0.132843	0.252095	0.477535	0.650441	0.618544	0.819033
Hebei	2021	0.526442	0.345762	0.668891	0.603676	0.48439	0.617376	0.684549	0.691515	0.908076	0.55191	0.377079	0.359204	0.200091	0.509216	0.153922	0.68043	0.249036	0.122122	0.235299	0.476941	0.718446	0.687077	0.850834
Hebei	2022	0.527546	0.365397	0.612584	0.61516	0.489493	0.624728	0.694872	0.69483	0.968147	0.604648	0.393693	0.389823	0.233298	0.631241	0.104762	0.641699	0.236683	0.200582	0.23289	0.476941	0.766355	0.624607	0.923181
Hebei	2023	0.52651	0.351242	0.61552	0.626826	0.482451	0.63205	0.700977	0.691639	0.847749	0.613061	0.384223	0.424021	0.230699	0.716993	0.168194	0.000158968	0.0946692	0.378747	0.294998	0.477535	0.803713	0.667447	0.919018
Shanxi	2011	0.243853	0.223388	0.185766	0.21379	0.148616	0.845469	0.832945	0.884586	0.759852	0.0795036	0.212385	0.0503971	0.413035	0.0236335	0.153287	0.177718	0.0149236	0.000266603	0.0412221	0.394399	0.0581739	0.0295681	0.132186
Shanxi	2012	0.244558	0.227041	0.185645	0.223504	0.163465	0.840251	0.824228	0.87076	0.779742	0.0873636	0.214595	0.0720711	0.415005	0.0366245	0.166608	0.227874	0.0194073	0.00959111	0.0453844	0.455563	0.157748	0.158295	0.332328
Shanxi	2013	0.242869	0.235716	0.195419	0.233098	0.163898	0.836401	0.819808	0.869053	0.623136	0.0989683	0.227885	0.0949334	0.384703	0.0447343	0.171048	0.249987	0.0220609	0.0083	0.0477902	0.530385	0.244277	0.262674	0.513975
Shanxi	2014	0.242934	0.211972	0.199311	0.240859	0.166195	0.838376	0.816786	0.862728	0.722323	0.105754	0.230665	0.117161	0.374994	0.0547212	0.186906	0.241282	0.0295642	0.0215404	0.0464449	0.596893	0.34708	0.234297	0.538862
Shanxi	2015	0.241901	0.204666	0.207302	0.245795	0.164052	0.839875	0.81675	0.864378	0.729639	0.105117	0.228841	0.13381	0.353686	0.0539679	0.201495	0.290282	0.0298845	0.0138633	0.0463203	0.671121	0.396544	0.267516	0.816159
Shanxi	2016	0.238818	0.205123	0.211445	0.124565	0.172509	0.841949	0.81971	0.861002	0.880917	0.106042	0.224172	0.150047	0.338021	0.0608925	0.230991	0.317914	0.0437931	0.0183659	0.0466641	0.748319	0.438228	0.362483	0.736018
Shanxi	2017	0.229408	0.2001	0.215114	0.0968136	0.169295	0.849079	0.830204	0.857569	0.805716	0.0966696	0.170865	0.168261	0.311175	0.0749155	0.225282	0.35167	0.0663946	0.0193576	0.0475334	0.823734	0.518983	0.492663	0.676279
Shanxi	2018	0.227932	0.190511	0.216259	0.1017	0.172522	0.852434	0.844171	0.860539	0.803467	0.100077	0.162094	0.193125	0.305894	0.0911093	0.222428	0.42776	0.0732116	0.0303235	0.0486054	0.875991	0.59218	0.482246	0.766352
Shanxi	2019	0.225911	0.185032	0.216361	0.107468	0.170149	0.854124	0.851643	0.862173	0.651242	0.113564	0.179058	0.222894	0.301647	0.111582	0.171048	0.460651	0.0841921	0.0322908	0.0503414	0.918746	0.653701	0.538128	0.783122
Shanxi	2020	0.227035	0.190968	0.21606	0.113328	0.178122	0.855527	0.854409	0.862055	0.756301	0.138707	0.199088	0.248098	0.304497	0.151449	0.152019	0.480982	0.101669	0.0363416	0.0524984	0.97219	0.700361	0.564866	0.800105
Shanxi	2021	0.230087	0.174073	0.216063	0.117776	0.177727	0.858011	0.862174	0.864295	0.724809	0.154818	0.211957	0.285047	0.310606	0.202146	0.168194	0.378392	0.0799371	0.0188814	0.0760178	0.991193	0.778589	0.64496	0.831099
Shanxi	2022	0.23164	0.180009	0.213703	0.122303	0.183225	0.861059	0.8658	0.860753	0.912054	0.161124	0.19385	0.311252	0.318592	0.235858	0.119986	0.424473	0.0683161	0.081136	0.0758822	1.0001	0.832579	0.570474	0.882948
Shanxi	2023	0.23362	0.173159	0.211999	0.129036	0.184986	0.861417	0.871904	0.84799	0.895913	0.167637	0.200693	0.346238	0.326211	0.263759	0.126012	0.000139288	0.0291067	0.113284	0.0947385	0.981098	0.864585	0.639086	0.881356
Inner Mongolia	2011	0.461555	0.300648	0.454546	0.232298	0.300997	0.757814	0.856802	0.823548	0.517959	0.160548	0.343091	0.0689194	0.300533	0.166065	0.230357	0.288237	0.0167995	0.0105819	0.0241313	0.0268221	0.0489398	0.0467529	0.069925
Inner Mongolia	2012	0.464451	0.29042	0.462651	0.240433	0.345939	0.740813	0.823532	0.79619	0.512253	0.180451	0.344049	0.0951142	0.295531	0.187861	0.285542	0.331754	0.0180805	0.0193273	0.0255541	0.0297912	0.157382	0.176075	0.281786
Inner Mongolia	2013	0.468211	0.279826	0.436965	0.251747	0.350175	0.721996	0.814937	0.759215	0.589821	0.200788	0.356893	0.121696	0.325296	0.273226	0.219574	0.34334	0.0224269	0.0302454	0.0277493	0.0321665	0.246365	0.262198	0.538905
Inner Mongolia	2014	0.477727	0.269232	0.445265	0.26698	0.347623	0.693546	0.817726	0.731815	0.555441	0.207317	0.345548	0.147305	0.326147	0.294828	0.261756	0.380941	0.0282832	0.0307876	0.0295232	0.0333542	0.352031	0.214652	0.624966
Inner Mongolia	2015	0.491655	0.257771	0.456771	0.279995	0.416459	0.684155	0.804992	0.713908	0.360691	0.20502	0.342077	0.167961	0.328006	0.307929	0.230991	0.497093	0.0333617	0.0208554	0.0340775	0.0333542	0.394822	0.256641	0.950589
Inner Mongolia	2016	0.514921	0.244803	0.463616	0.244245	0.412722	0.676717	0.808789	0.711962	0.140699	0.208488	0.340602	0.189483	0.343613	0.314957	0.252875	0.536407	0.0361983	0.0210287	0.0334945	0.033948	0.430676	0.353579	0.844769
Inner Mongolia	2017	0.58671	0.234575	0.470256	0.255743	0.411599	0.676159	0.788772	0.716189	0.072649	0.210059	0.387542	0.214677	0.405467	0.319622	0.250021	0.5943	0.0515252	0.0325744	0.0373866	0.033948	0.510152	0.48119	0.708611
Inner Mongolia	2018	0.574214	0.222611	0.473583	0.269327	0.449717	0.693541	0.825601	0.717265	0.377502	0.224023	0.383476	0.246149	0.389731	0.348542	0.374664	0.665108	0.0568324	0.0247201	0.0406796	0.033948	0.575957	0.447684	0.729213
Inner Mongolia	2019	0.578219	0.207954	0.473992	0.284619	0.462371	0.699493	0.839684	0.716547	0.656025	0.239552	0.409725	0.284389	0.393077	0.389887	0.33375	0.643604	0.0760025	0.0215584	0.0434927	0.033948	0.62322	0.503247	0.757366
Inner Mongolia	2020	0.578074	0.193251	0.473982	0.29896	0.463851	0.71459	0.863199	0.713027	0.439491	0.263616	0.442158	0.31756	0.392951	0.432423	0.399719	0.638349	0.106977	0.0415065	0.0445181	0.033948	0.66401	0.533695	0.76679
Inner Mongolia	2021	0.568908	0.183662	0.473979	0.312751	0.486329	0.666521	0.843262	0.697191	0.696159	0.291481	0.410593	0.363283	0.384243	0.530687	0.425092	0.602484	0.0971398	0.000777135	0.0577607	0.033948	0.742554	0.618917	0.80488
Inner Mongolia	2022	0.56939	0.191424	0.654983	0.339676	0.494021	0.686946	0.853591	0.650158	0.6699	0.332261	0.434184	0.396973	0.237403	0.665007	0.373712	0.67134	0.100892	0.0053221	0.0495378	0.033948	0.805879	0.553866	0.843951
Inner Mongolia	2023	0.573214	0.180922	0.720882	0.364454	0.501318	0.696167	0.853591	0.611868	0.473625	0.342873	0.420926	0.437791	0.204146	0.735989	0.381641	0.000162953	0.0506101	0.0414761	0.0868158	0.033948	0.844811	0.62909	0.840244
Liaoning	2011	0.266741	0.310557	0.226949	0.174013	0.256093	0.803205	0.6609	0.559705	0.893585	0.276727	0.324635	0.096535	0.359654	0.054483	0.212596	0.242273	0.0405447	0.0377461	0.180608	0.0487936	0.0926567	0.0752685	0.0592285
Liaoning	2012	0.271006	0.308182	0.243887	0.183591	0.273888	0.800026	0.645712	0.554261	0.916032	0.311586	0.326882	0.12366	0.333382	0.0714587	0.232577	0.298049	0.0409565	0.0774049	0.184149	0.0499812	0.187473	0.225526	0.241579
Liaoning	2013	0.270887	0.303205	0.199261	0.191517	0.276516	0.793198	0.639717	0.551026	0.893514	0.33494	0.321277	0.152076	0.435486	0.106298	0.250338	0.343298	0.0497866	0.0726473	0.194784	0.0499812	0.268536	0.346931	0.476857
Liaoning	2014	0.267952	0.305077	0.209402	0.198926	0.220169	0.793493	0.638136	0.550582	0.542868	0.347024	0.300198	0.178697	0.402633	0.111012	0.284591	0.326617	0.0491003	0.0933099	0.213863	0.0517627	0.37362	0.309922	0.564644
Liaoning	2015	0.271617	0.305762	0.216509	0.205235	0.275368	0.792739	0.640694	0.564191	0.649087	0.362336	0.312964	0.201053	0.392756	0.158597	0.288397	0.32825	0.0548651	0.154594	0.226166	0.0529504	0.413828	0.34072	0.878995
Liaoning	2016	0.26138	0.313068	0.224589	0.156558	0.291825	0.798402	0.662738	0.579089	0.862401	0.340798	0.368972	0.222335	0.354394	0.176726	0.361026	0.353748	0.0620024	0.00139417	0.242131	0.0535442	0.443032	0.423374	0.687557
Liaoning	2017	0.268493	0.31736	0.230349	0.160079	0.293751	0.802044	0.655351	0.618917	0.775338	0.294449	0.305655	0.244709	0.355781	0.194193	0.335653	0.337933	0.0806692	0.0317422	0.261168	0.0547318	0.512202	0.564668	0.6521
Liaoning	2018	0.270779	0.31599	0.231695	0.162235	0.276108	0.802665	0.670027	0.640662	0.652757	0.311545	0.302018	0.268205	0.357269	0.226782	0.321381	0.339781	0.100297	0.025116	0.150654	0.0547318	0.580954	0.541273	0.783009
Liaoning	2019	0.271435	0.297543	0.233206	0.170543	0.306418	0.809858	0.69442	0.654929	0.923301	0.336447	0.329433	0.305713	0.355355	0.277067	0.451099	0.369817	0.136441	0.0726062	0.086254	0.0547318	0.625362	0.587004	0.810193
Liaoning	2020	0.276081	0.279095	0.233721	0.179396	0.294784	0.813144	0.733196	0.652134	0.687161	0.353869	0.343081	0.340383	0.36294	0.35391	0.49455	0.371478	0.214311	0.0594608	0.0900332	0.0535442	0.656935	0.637799	0.807132
Liaoning	2021	0.278785	0.26494	0.233716	0.18553	0.320285	0.81671	0.741352	0.652124	0.941225	0.381929	0.336451	0.386011	0.36799	0.363739	0.55481	0.301304	0.177846	0.0864103	0.0817413	0.0523565	0.72794	0.708799	0.839928
Liaoning	2022	0.278649	0.280465	0.246618	0.193468	0.313371	0.823067	0.749813	0.65654	0.811375	0.402439	0.338003	0.403871	0.34178	0.501136	0.519922	0.340954	0.152545	0.0822592	0.0628726	0.0517627	0.781368	0.647696	0.888978
Liaoning	2023	0.280921	0.259917	0.247319	0.205988	0.323436	0.82447	0.755918	0.653349	0.922437	0.409493	0.330693	0.444559	0.344456	0.591405	0.486938	0.000126779	0.058388	0.117974	0.0935924	0.0517627	0.815927	0.685931	0.889286
Jilin	2011	0.3375	0.28863	0.260558	0.17063	0.400947	0.73215	0.727867	0.835006	0.854232	0.166291	0.458406	0.0867959	0.415446	0.0771535	0.393693	0.188105	0.0196361	0.0150199	0.0192522	0.457345	0.0470026	0.0343902	0.0433118
Jilin	2012	0.3436	0.278173	0.267359	0.185685	0.436564	0.715945	0.693413	0.836184	0.850349	0.184734	0.448402	0.115393	0.411635	0.0853216	0.543392	0.214391	0.0207799	0.0186733	0.0210511	0.503069	0.145328	0.17288	0.269449
Jilin	2013	0.350036	0.268178	0.214948	0.198913	0.449423	0.701807	0.694805	0.830488	0.852622	0.198439	0.438434	0.14226	0.554373	0.0896344	0.591917	0.234228	0.0262701	0.00862802	0.0221037	0.550575	0.225874	0.280275	0.463306
Jilin	2014	0.363327	0.258789	0.233092	0.213171	0.447101	0.687936	0.64288	0.832489	0.836971	0.205951	0.418072	0.16807	0.527155	0.089068	0.559567	0.227176	0.0260413	0.0386431	0.0223628	0.602832	0.329322	0.256582	0.52676
Jilin	2015	0.367521	0.249826	0.258005	0.230778	0.503398	0.681499	0.625982	0.828322	0.799821	0.215512	0.430019	0.182176	0.471778	0.107503	0.290934	0.300692	0.0321721	0.0499479	0.0227864	0.637867	0.37362	0.29363	0.864954
Jilin	2016	0.367338	0.240392	0.264338	0.227212	0.525926	0.678172	0.648947	0.827042	0.823025	0.202851	0.383361	0.202759	0.457191	0.144586	0.312184	0.405076	0.0386231	0.0174271	0.0235488	0.675278	0.409027	0.391774	0.67344
Jilin	2017	0.394276	0.231397	0.273675	0.240742	0.526347	0.681802	0.662555	0.823255	0.767406	0.14915	0.274929	0.224136	0.480547	0.168574	0.324553	0.408215	0.0463095	0.0244456	0.0244615	0.70972	0.485455	0.52966	0.646013
Jilin	2018	0.393927	0.223196	0.273675	0.254419	0.459846	0.685635	0.694927	0.837728	0.687706	0.158909	0.289219	0.244744	0.479987	0.198102	0.365783	0.395549	0.0570154	0.0291653	0.0254043	0.725753	0.548092	0.493153	0.790364
Jilin	2019	0.396304	0.214534	0.276198	0.268579	0.491126	0.687376	0.709169	0.847575	0.873222	0.179914	0.415624	0.275431	0.478241	0.223328	0.293789	0.415263	0.0609501	0.0385286	0.0254156	0.739411	0.589423	0.534235	0.792827
Jilin	2020	0.398534	0.206488	0.275575	0.286921	0.481596	0.689855	0.719718	0.85321	0.711549	0.223266	0.478752	0.304647	0.483165	0.264246	0.319161	0.42513	0.0900025	0.0228436	0.0262542	0.742974	0.621781	0.577302	0.804901
Jilin	2021	0.400905	0.198274	0.275569	0.305949	0.511702	0.69308	0.730651	0.865058	0.942172	0.222967	0.445014	0.345326	0.48696	0.364941	0.419066	0.340204	0.0881267	0.0269883	0.0341001	0.742974	0.696259	0.649913	0.826019
Jilin	2022	0.403487	0.209689	0.275734	0.321683	0.517009	0.693436	0.737604	0.870326	0.954485	0.242931	0.490665	0.358056	0.490713	0.467157	0.339459	0.37932	0.0783358	0.0454766	0.027358	0.74238	0.744149	0.58341	0.854711
Jilin	2023	0.407832	0.196904	0.282302	0.336067	0.530493	0.693788	0.749813	0.870326	0.938438	0.235622	0.461058	0.392608	0.483153	0.534448	0.341997	0.000136147	0.0320348	0.0403633	0.0414222	0.741786	0.776726	0.640361	0.847441
Heilongjiang	2011	0.797592	0.300424	0.647826	0.302072	0.707061	0.685439	0.530305	0.775912	0.636301	0.243387	0.513805	0.080286	0.401839	0.16018	0.658521	0.261974	0.0458519	0.0188107	0.0270921	0.0511689	0.0413415	0.058679	0.13274
Heilongjiang	2012	0.798516	0.29568	0.715895	0.336396	0.838202	0.668794	0.51472	0.747192	0.424952	0.302633	0.587637	0.105732	0.350048	0.217049	0.670573	0.316718	0.0564206	0.0391893	0.0301246	0.0523565	0.138978	0.186037	0.273498
Heilongjiang	2013	0.796137	0.307406	0.802644	0.358746	0.762363	0.662217	0.493324	0.744677	0.352806	0.35799	0.663755	0.131616	0.294491	0.278047	0.50121	0.339745	0.0656168	0.000714669	0.0314316	0.0571071	0.220794	0.289463	0.501659
Heilongjiang	2014	0.797789	0.319369	0.796982	0.381843	0.792737	0.652422	0.472782	0.747721	0.808392	0.379252	0.661911	0.159625	0.298613	0.255572	0.503113	0.358852	0.0738521	0.00422229	0.0327321	0.057701	0.324091	0.269421	0.547343
Heilongjiang	2015	0.802265	0.307954	0.831587	0.403471	0.967965	0.647671	0.499838	0.751955	0.721897	0.391457	0.665605	0.17621	0.282288	0.28416	0.547198	0.501434	0.0969111	0.0307369	0.0342369	0.0582948	0.371877	0.312244	0.856963
Heilongjiang	2016	0.810974	0.294255	0.893225	0.41795	0.94249	0.651269	0.502737	0.753621	0.0001	0.40388	0.661634	0.19524	0.256662	0.312771	0.537683	0.589927	0.0975516	0.0147834	0.0366735	0.0582948	0.407524	0.396545	0.731778
Heilongjiang	2017	0.964831	0.279552	0.908291	0.431488	0.94175	0.653448	0.498195	0.762571	0.633057	0.435494	0.711382	0.216758	0.327408	0.348543	0.528803	0.599778	0.121343	0.0311101	0.0378179	0.0606701	0.482334	0.534099	0.673825
Heilongjiang	2018	0.958637	0.267771	0.921879	0.451918	0.95406	0.661261	0.553356	0.770035	0.0163667	0.438555	0.699628	0.246177	0.317247	0.390317	0.55481	0.613984	0.118643	0.0222871	0.0393315	0.0594824	0.547182	0.49247	0.777189
Heilongjiang	2019	0.964995	0.250876	0.930777	0.472616	0.953576	0.692705	0.613883	0.787903	0.16182	0.463405	0.893895	0.276621	0.315876	0.425811	0.433338	0.648942	0.167186	0.033647	0.0407429	0.0594824	0.589512	0.531679	0.79877
Heilongjiang	2020	0.9742	0.23663	0.929859	0.503991	0.958398	0.69137	0.635359	0.792147	0.247463	0.504713	0.960276	0.307267	0.320874	0.504082	0.567179	0.672881	0.224788	0.0793537	0.0427788	0.0594824	0.621131	0.569489	0.793832
Heilongjiang	2021	0.98438	0.226584	0.929858	0.514327	1.0001	0.670641	0.657695	0.822435	0.803183	0.50649	0.889867	0.351722	0.325889	0.567464	0.774918	0.63937	0.184206	0.000768788	0.056441	0.0588886	0.701021	0.651843	0.82919
Heilongjiang	2022	0.993869	0.227497	0.926989	0.527808	0.986756	0.67129	0.670454	0.832036	0.977121	0.527486	0.867791	0.369497	0.332062	0.677985	0.604286	0.689847	0.152225	0.0174191	0.0410603	0.0588886	0.748558	0.59261	0.873546
Heilongjiang	2023	1.0001	0.206493	0.940119	0.546564	0.989958	0.671157	0.670454	0.838417	0.903085	0.509135	0.846517	0.399945	0.32832	0.792552	0.43429	0.000170639	0.0565121	0.0139031	0.0579652	0.0582948	0.781697	0.645882	0.853895
Shanghai	2011	0.0206104	0.00799041	0.0139592	0.00098317	0.0119894	0.989657	0.967776	0.951727	0.994429	0.0069091	0.0173532	0.296122	0.239177	0.0542032	0.0001	0.11893	0.0689109	0.0898735	0.0998613	0.0024753	0.208654	0.157819	0.0001
Shanghai	2012	0.0197745	0.0118352	0.0138687	0.00151488	0.0137754	0.991034	0.970694	0.955521	0.996702	0.00749016	0.0166733	0.340425	0.227595	0.0432614	0.00105147	0.160442	0.0804861	0.0771997	0.102202	0.0024753	0.317354	0.333397	0.222466
Shanghai	2013	0.0190778	0.0121365	0.011579	0.00154807	0.0109944	0.991325	0.975566	0.955087	0.993553	0.00763305	0.0151031	0.385788	0.247676	0.0485371	0.00105147	0.137841	0.0887672	0.123845	0.43376	0.0024753	0.399062	0.544159	0.474663
Shanghai	2014	0.0177418	0.0114288	0.011579	0.00189425	0.0107775	0.992209	0.977721	0.955562	0.997318	0.0075304	0.0125852	0.437032	0.225611	0.0607007	0.0001	0.148943	0.0957673	0.115512	0.439371	0.0024753	0.506062	0.468455	0.499337
Shanghai	2015	0.0166396	0.0119767	0.0122108	0.00198852	0.0124232	0.992542	0.979253	0.959573	0.99727	0.00593717	0.0091093	0.489049	0.199324	0.0778059	0.00136863	0.196786	0.105009	0.166585	0.456088	0.0024753	0.553331	0.502249	0.782003
Shanghai	2016	0.0136483	0.011721	0.0124562	0.00223741	0.0106882	0.993605	0.982317	0.962662	0.999449	0.00451156	0.00723355	0.548858	0.148366	0.0614846	0.0001	0.240956	0.124133	0.182453	0.487994	0.0024753	0.586189	0.545241	0.644366
Shanghai	2017	0.0130075	0.0103466	0.0126012	0.00220196	0.00915739	0.993977	0.984698	0.967123	0.997318	0.00512351	0.00619805	0.608393	0.136616	0.0656897	0.00136863	0.335947	0.137768	0.22366	0.502931	0.00306912	0.6543	0.7726	0.687762
Shanghai	2018	0.0128315	0.00961142	0.0126012	0.0001	0.00965491	0.994716	0.98681	0.96994	0.998454	0.00487699	0.004568	0.67426	0.133809	0.0711344	0.00105147	0.345763	0.16563	0.106936	0.522975	0.00306912	0.741355	0.781228	0.922038
Shanghai	2019	0.0114596	0.00959772	0.0126012	0.000406817	0.00865987	0.995893	0.989289	0.974943	0.998123	0.00449179	0.00275089	0.747121	0.111944	0.0836154	0.000417158	0.384921	0.191709	0.447564	0.547198	0.00306912	0.810059	0.85964	0.968845
Shanghai	2020	0.0110499	0.00960228	0.00865827	0.000714803	0.00808581	0.996791	0.990064	0.976057	0.998999	0.0040837	0.00257206	0.791453	0.147048	0.0794004	0.000734317	0.34865	0.270357	0.606932	0.53978	0.00306912	0.84655	0.956422	0.942961
Shanghai	2021	0.0116536	0.00238311	0.00865122	0.000761561	0.00841749	0.997212	0.991651	0.979733	0.994263	0.00319823	0.00117529	0.884696	0.158258	0.104285	0.0001	0.335386	0.262259	0.240008	0.00371141	0.00366295	0.928817	1.0001	0.941434
Shanghai	2022	0.0119707	0.000556621	0.00797871	0.000569307	0.0086216	0.997266	0.993995	0.978814	0.999188	0.00357222	0.000628777	0.915921	0.173001	0.128287	0.000417158	0.285985	0.199075	0.414435	0.00110728	0.00366295	0.977223	0.911059	0.97938
Shanghai	2023	0.0122353	0.0001	0.00812978	0.000960112	0.00942529	0.997429	0.993995	0.978814	1.0001	0.00325267	0.0001	1.0001	0.175937	0.149271	0.00168579	0.000120024	0.0905058	0.534222	0.00425025	0.00366295	1.0001	0.949943	1.0001
Jiangsu	2011	0.497922	0.444205	0.568885	0.302696	0.418398	0.532571	0.47816	0.677472	0.755803	0.407107	0.232932	0.167137	0.2392	0.0859542	0.222428	0.454829	0.169748	0.28599	0.79873	0.462095	0.139452	0.143889	0.0174231
Jiangsu	2012	0.497154	0.428812	0.586031	0.310882	0.434192	0.541368	0.495406	0.657976	0.83503	0.453556	0.236124	0.203019	0.227195	0.115533	0.229405	0.55485	0.235539	0.186417	0.843366	0.50782	0.225529	0.297341	0.218204
Jiangsu	2013	0.499262	0.415456	0.563877	0.325285	0.433094	0.547159	0.510777	0.644268	0.884848	0.481945	0.227583	0.238876	0.243735	0.153459	0.182466	0.638899	0.311259	0.235566	0.895908	0.549387	0.307302	0.429382	0.461878
Jiangsu	2014	0.498932	0.397529	0.580021	0.343715	0.441718	0.551684	0.520703	0.634696	0.868984	0.505141	0.207598	0.276009	0.232504	0.158086	0.221476	0.661685	0.337566	0.401738	0.912386	0.587986	0.411697	0.385726	0.508158
Jiangsu	2015	0.503298	0.377127	0.589525	0.356952	0.454998	0.556771	0.529439	0.655765	0.854445	0.552892	0.211501	0.309547	0.229679	0.161302	0.218939	0.742085	0.367991	0.366408	0.913014	0.62896	0.460688	0.420512	0.799688
Jiangsu	2016	0.498821	0.363041	0.605102	0.363066	0.448326	0.56727	0.541135	0.653537	0.928889	0.569501	0.195441	0.344395	0.216512	0.165476	0.224331	0.72518	0.449018	0.319606	0.929497	0.66934	0.497881	0.488888	0.671757
Jiangsu	2017	0.4909	0.34252	0.617035	0.369466	0.457052	0.579454	0.559552	0.649887	0.978707	0.563497	0.173933	0.384498	0.203558	0.171556	0.240189	0.675594	0.511835	0.593724	0.938827	0.702	0.58205	0.639409	0.675791
Jiangsu	2018	0.488523	0.327917	0.624389	0.371449	0.463367	0.595476	0.581327	0.646763	0.910207	0.566038	0.164759	0.428079	0.197637	0.184719	0.232577	0.733312	0.61798	0.014547	0.961323	0.727535	0.66735	0.647655	0.854617
Jiangsu	2019	0.483423	0.313369	0.628317	0.378557	0.469222	0.604245	0.594782	0.652861	0.947097	0.591295	0.158559	0.475363	0.19176	0.345265	0.217036	0.759573	0.790831	0.0666172	0.969278	0.752475	0.730951	0.71197	0.885084
Jiangsu	2020	0.485774	0.299292	0.631276	0.386241	0.472143	0.611919	0.605117	0.660446	0.967981	0.627831	0.162588	0.514708	0.191837	0.439085	0.187858	0.802888	0.987472	0.551158	1.0001	0.761383	0.775314	0.770529	0.882488
Jiangsu	2021	0.488143	0.278639	0.631271	0.381294	0.474312	0.619219	0.618278	0.679594	0.979346	0.654425	0.148767	0.581676	0.193545	0.523477	0.185638	0.813888	0.807393	0.304611	0.257289	0.76257	0.853981	0.837984	0.901953
Jiangsu	2022	0.489444	0.276812	0.574071	0.390031	0.477246	0.626833	0.633826	0.691639	0.981477	0.691338	0.147912	0.625481	0.228986	0.633425	0.166925	0.815475	0.662771	0.759586	0.268148	0.754851	0.910185	0.784348	0.968192
Jiangsu	2023	0.493106	0.274073	0.574832	0.397281	0.480894	0.63119	0.639931	0.698021	0.993165	0.707735	0.144922	0.677186	0.23137	0.732609	0.204033	0.000178045	0.250638	0.673757	0.302273	0.748319	0.944338	0.823642	0.969489
Zhejiang	2011	0.156134	0.235611	0.20677	0.178641	0.0961339	0.877086	0.616404	0.830708	0.898108	0.187407	0.18116	0.256339	0.17592	0.0271506	0.12062	0.27473	0.162931	0.119966	0.420615	0.0470121	0.179983	0.172265	0.0291635
Zhejiang	2012	0.147028	0.218817	0.20895	0.180764	0.0791162	0.876973	0.622387	0.818357	0.86896	0.197468	0.177812	0.297904	0.153836	0.0512535	0.132038	0.300393	0.248945	0.308962	0.431513	0.0481998	0.272475	0.384396	0.212089
Zhejiang	2013	0.146225	0.201461	0.199498	0.178712	0.0900616	0.876583	0.626513	0.810775	0.686001	0.211997	0.174544	0.34151	0.165908	0.0627519	0.217036	0.377508	0.261664	0.00388772	0.448973	0.0481998	0.357412	0.5135	0.457233
Zhejiang	2014	0.143732	0.18526	0.20195	0.175539	0.0930467	0.880533	0.647574	0.80754	0.95188	0.212583	0.162865	0.390058	0.156915	0.0742937	0.131404	0.386014	0.316703	0.0714575	0.449187	0.0481998	0.464003	0.450377	0.475536
Zhejiang	2015	0.144819	0.167981	0.202989	0.171059	0.0709263	0.883475	0.661553	0.801857	0.907081	0.219806	0.157081	0.43531	0.157714	0.0829551	0.170414	0.543808	0.389815	0.062062	0.449297	0.0481998	0.511034	0.485342	0.780362
Zhejiang	2016	0.143761	0.151534	0.20516	0.154162	0.0684769	0.887757	0.704139	0.802361	0.892212	0.237091	0.152651	0.480288	0.152361	0.0831755	0.148213	0.531544	0.411135	0.162364	0.459527	0.0481998	0.543564	0.523708	0.641621
Zhejiang	2017	0.124482	0.13673	0.204913	0.149304	0.0704287	0.890352	0.723545	0.800475	0.974777	0.232806	0.136327	0.534271	0.112141	0.0919693	0.0473566	0.512625	0.495822	0.141733	0.484721	0.0487936	0.62022	0.713762	0.671464
Zhejiang	2018	0.124323	0.117968	0.204315	0.144557	0.0728526	0.897195	0.739283	0.797795	0.960262	0.238	0.127243	0.594891	0.112546	0.100677	0.179612	0.533054	0.550038	0.219691	0.500498	0.0487936	0.706563	0.724892	0.881148
Zhejiang	2019	0.125699	0.10257	0.19889	0.136917	0.0719596	0.904588	0.77074	0.804157	0.916411	0.254096	0.121982	0.661372	0.122429	0.120368	0.114277	0.547606	0.506711	0.219812	0.509673	0.0481998	0.775949	0.789662	0.919683
Zhejiang	2020	0.126677	0.0859447	0.200465	0.129762	0.0736945	0.908649	0.783016	0.803663	0.97319	0.265615	0.12173	0.714449	0.122467	0.145702	0.556078	0.562796	0.602927	0.290592	0.515359	0.0481998	0.818284	0.858334	0.900131
Zhejiang	2021	0.126683	0.0850315	0.200466	0.126782	0.0756336	0.910542	0.795213	0.794745	0.964903	0.272303	0.108142	0.800136	0.122479	0.174078	0.211327	0.585142	0.529358	0.328011	0.209575	0.0476059	0.891164	0.916499	0.909998
Zhejiang	2022	0.127508	0.0836616	0.171394	0.126322	0.0756463	0.912251	0.804754	0.796937	0.975297	0.286375	0.107622	0.860008	0.168486	0.204977	0.556078	0.611578	0.467731	0.405567	0.284901	0.0476059	0.946241	0.828297	0.972936
Zhejiang	2023	0.128444	0.0809219	0.173627	0.128319	0.077917	0.913985	0.816963	0.803318	0.99786	0.304722	0.101197	0.930945	0.166901	0.240645	0.0711435	0.000157654	0.207768	0.195073	0.284186	0.0464183	0.975596	0.867335	0.979907
Anhui	2011	0.587283	0.721059	0.527434	0.41967	0.396418	0.543166	0.289072	0.742329	0.688298	0.262584	0.500234	0.0655353	0.346337	0.134731	0.228771	0.25895	0.0672638	0.0624755	0.0565082	0.044043	0.0393613	0.0969777	0.0578009
Anhui	2012	0.583778	0.690146	0.533176	0.438201	0.44839	0.537748	0.293552	0.726193	0.727295	0.284423	0.48044	0.0917559	0.338057	0.171575	0.24558	0.316775	0.114892	0.104758	0.0622487	0.0446368	0.138074	0.26065	0.244562
Anhui	2013	0.582203	0.662063	0.643667	0.456114	0.414801	0.530893	0.287246	0.714352	0.581155	0.307262	0.463193	0.118209	0.253293	0.182482	0.333433	0.351866	0.160552	0.0421618	0.0670289	0.0452306	0.225142	0.365425	0.462198
Anhui	2014	0.582196	0.637223	0.647679	0.473125	0.432176	0.526695	0.310444	0.71029	0.848337	0.324698	0.434808	0.145758	0.250781	0.18335	0.396231	0.369901	0.164395	0.0740974	0.0715833	0.0464183	0.332874	0.331651	0.563984
Anhui	2015	0.58252	0.628502	0.658207	0.489352	0.51655	0.530485	0.328306	0.704584	0.771289	0.33828	0.422811	0.169119	0.244567	0.190957	0.446659	0.425115	0.173957	0.107268	0.0761774	0.0481998	0.365355	0.363282	0.796258
Anhui	2016	0.578784	0.622703	0.663901	0.51096	0.501829	0.546908	0.360928	0.707702	0.682615	0.359801	0.397983	0.192362	0.238607	0.215128	0.381324	0.459758	0.179265	0.113545	0.0786041	0.0487936	0.415389	0.443003	0.705292
Anhui	2017	0.567813	0.613479	0.674127	0.46913	0.509215	0.558551	0.399448	0.705676	0.905519	0.355119	0.36086	0.219171	0.225273	0.237346	0.377518	0.501749	0.232337	0.0839607	0.0834342	0.0487936	0.501072	0.600946	0.675328
Anhui	2018	0.570733	0.60905	0.679364	0.486548	0.507633	0.568281	0.431296	0.704951	0.795795	0.361198	0.331309	0.251147	0.224316	0.258275	0.312818	0.518631	0.284631	0.0914845	0.088156	0.0487936	0.584384	0.601092	0.82301
Anhui	2019	0.571446	0.60599	0.68589	0.494593	0.51359	0.587645	0.467349	0.686103	0.773349	0.400985	0.295237	0.287828	0.221202	0.265635	0.247801	0.541743	0.306501	0.16608	0.0923195	0.0493874	0.644094	0.664418	0.84927
Anhui	2020	0.573814	0.363114	0.690183	0.505833	0.509151	0.599064	0.497731	0.687494	0.707051	0.443158	0.309784	0.318938	0.220438	0.327575	0.151384	0.680061	0.378926	0.164331	0.100373	0.0493874	0.692736	0.713259	0.854115
Anhui	2021	0.578334	0.346675	0.690178	0.515245	0.517877	0.60633	0.542301	0.689709	0.930096	0.469448	0.293953	0.364184	0.223422	0.429194	0.353097	0.693492	0.362364	0.137316	0.137797	0.0493874	0.780305	0.780196	0.886573
Anhui	2022	0.581411	0.351698	0.685175	0.526243	0.519471	0.612702	0.560572	0.691639	0.907744	0.491696	0.293091	0.395266	0.228214	0.605515	0.285225	0.729786	0.380482	0.276193	0.150508	0.0493874	0.833328	0.718139	0.947739
Anhui	2023	0.588665	0.341653	0.70096	0.535627	0.525939	0.615793	0.572781	0.69483	0.993375	0.489251	0.278865	0.435801	0.224346	0.696616	0.326139	0.000167854	0.159637	0.00887612	0.168335	0.0476059	0.865325	0.74982	0.944029
Fujian	2011	0.144507	0.253068	0.131724	0.0873491	0.0822544	0.836524	0.650455	0.832629	0.968668	0.203344	0.346344	0.120844	0.310228	0.0219936	0.0727292	0.153029	0.0606756	0.00353799	0.132897	0.362927	0.13209	0.122636	0.0787676
Fujian	2012	0.143016	0.242566	0.131882	0.0900635	0.0662445	0.836616	0.65308	0.829828	0.962464	0.225819	0.34005	0.152154	0.305044	0.028405	0.0793896	0.179713	0.0767802	0.0457851	0.153962	0.384304	0.238552	0.264996	0.254108
Fujian	2013	0.144929	0.224301	0.155487	0.0938315	0.0811828	0.837028	0.653337	0.828354	0.934642	0.248139	0.333737	0.184213	0.2462	0.0334613	0.0917587	0.229783	0.109676	0.0251261	0.170816	0.396181	0.334746	0.371894	0.512057
Fujian	2014	0.145785	0.216082	0.154521	0.096214	0.0815145	0.83416	0.661962	0.82268	0.975889	0.267677	0.315271	0.21638	0.250834	0.0391768	0.0968333	0.235742	0.115486	0.0657231	0.181275	0.405682	0.435461	0.313811	0.550219
Fujian	2015	0.147499	0.210146	0.146167	0.0974041	0.0602105	0.832491	0.665753	0.819059	0.952046	0.283575	0.306683	0.245894	0.276916	0.0418903	0.0689233	0.325153	0.197062	0.0575707	0.187947	0.410433	0.483633	0.38005	0.819228
Fujian	2016	0.147235	0.196447	0.145204	0.0887278	0.0573147	0.832434	0.668091	0.81792	0.90862	0.319166	0.308602	0.277062	0.27877	0.0417064	0.234163	0.302141	0.295246	0.063831	0.189637	0.422309	0.513479	0.473107	0.637454
Fujian	2017	0.0961058	0.181835	0.146656	0.0859621	0.0585776	0.843002	0.687748	0.817948	0.986568	0.302215	0.257713	0.311564	0.128866	0.0468536	0.104128	0.32945	0.297167	0.182105	0.191595	0.429435	0.588678	0.650124	0.654006
Fujian	2018	0.0979439	0.173616	0.149775	0.0856491	0.0600319	0.850851	0.706208	0.825648	0.981548	0.325169	0.248598	0.349963	0.128567	0.0533818	0.0736807	0.317542	0.340677	0.00357266	0.199312	0.43181	0.66813	0.650058	0.852784
Fujian	2019	0.0993884	0.159461	0.148487	0.0863625	0.0594323	0.857139	0.728588	0.830418	0.971035	0.358259	0.228432	0.395097	0.134911	0.0581296	0.0838298	0.325302	0.345619	0.061514	0.206316	0.432404	0.729129	0.708462	0.879395
Fujian	2020	0.10149	0.138456	0.153646	0.0880573	0.0605039	0.864809	0.742713	0.851742	0.984792	0.379762	0.23227	0.428989	0.131674	0.0689073	0.0660689	0.331178	0.408711	0.0537756	0.219844	0.433592	0.769078	0.784018	0.857171
Fujian	2021	0.102844	0.128411	0.153643	0.0888359	0.0610269	0.870671	0.751712	0.869356	0.989054	0.404142	0.22121	0.489661	0.135387	0.082959	0.101908	0.269797	0.306684	0.155669	0.153403	0.432404	0.843982	0.851997	0.873282
Fujian	2022	0.104833	0.127497	0.114546	0.0908111	0.0613203	0.877087	0.762022	0.867135	0.975108	0.428659	0.215637	0.535068	0.231039	0.0958235	0.110788	0.301984	0.262121	0.131444	0.136318	0.431216	0.901145	0.798039	0.927838
Fujian	2023	0.106813	0.122931	0.115056	0.0928453	0.0616137	0.881186	0.774231	0.879898	0.980426	0.447084	0.22056	0.579899	0.236522	0.110467	0.082244	0.000121201	0.117316	0.182913	0.168086	0.430623	0.924731	0.824141	0.926222
Jiangxi	2011	0.354882	0.35905	0.269783	0.30978	0.258299	0.808644	0.398575	0.864869	0.745575	0.160773	0.450684	0.0738536	0.425148	0.0465334	0.167877	0.211956	0.0103484	0.0112784	0.0365689	0.38371	0.0259513	0.0954695	0.0611036
Jiangxi	2012	0.357387	0.337452	0.275824	0.339921	0.2695	0.807955	0.393227	0.856685	0.840712	0.17638	0.445038	0.0989117	0.417017	0.0595679	0.184052	0.283152	0.0141916	0.0183808	0.0402343	0.422309	0.124643	0.249974	0.247992
Jiangxi	2013	0.359204	0.321013	0.289403	0.144919	0.266375	0.80751	0.396225	0.853092	0.751778	0.19094	0.430238	0.124383	0.394101	0.0634379	0.128866	0.322707	0.018904	0.0221609	0.0433655	0.454376	0.21072	0.351277	0.475685
Jiangxi	2014	0.360386	0.301881	0.290319	0.152782	0.26987	0.805691	0.427712	0.847601	0.884848	0.202986	0.405472	0.150929	0.394239	0.0710049	0.13743	0.368036	0.0318518	0.0235356	0.0467139	0.47991	0.31602	0.318455	0.580945
Jiangxi	2015	0.360948	0.285625	0.294321	0.163524	0.281619	0.804691	0.433151	0.844872	0.892377	0.213763	0.401122	0.177343	0.387924	0.0743916	0.14631	0.410078	0.0575187	0.0122985	0.04786	0.496537	0.363654	0.348796	0.791805
Jiangxi	2016	0.359737	0.268913	0.295726	0.159059	0.281466	0.806951	0.443437	0.848765	0.814051	0.235809	0.389311	0.203141	0.383643	0.0781786	0.148213	0.42744	0.0904601	0.0560982	0.050182	0.500694	0.402244	0.428679	0.710715
Jiangxi	2017	0.364849	0.252292	0.296123	0.167203	0.279846	0.816793	0.470609	0.846366	0.895669	0.230827	0.346043	0.231663	0.390572	0.0998596	0.176123	0.447162	0.139277	0.0967056	0.0521364	0.501881	0.487766	0.593745	0.675128
Jiangxi	2018	0.359418	0.232018	0.294988	0.172661	0.275891	0.833341	0.535036	0.850485	0.874524	0.237295	0.321584	0.26313	0.384458	0.139152	0.200861	0.441056	0.165173	0.0382991	0.0541142	0.503069	0.569438	0.575091	0.823468
Jiangxi	2019	0.357142	0.214621	0.295621	0.17935	0.271656	0.844058	0.623443	0.851117	0.715882	0.264343	0.312777	0.297653	0.379952	0.158484	0.213548	0.456059	0.168559	0.0763494	0.0574849	0.501881	0.629404	0.620068	0.838316
Jiangxi	2020	0.365238	0.19873	0.295981	0.18843	0.272472	0.853556	0.684445	0.850236	0.7769	0.291937	0.32875	0.328254	0.391404	0.201964	0.130769	0.544713	0.212892	0.114779	0.0629417	0.501288	0.676356	0.687634	0.83309
Jiangxi	2021	0.367116	0.184575	0.295982	0.196297	0.276095	0.853874	0.691032	0.850555	0.900499	0.306356	0.296195	0.372257	0.394202	0.268283	0.152019	0.560858	0.182742	0.128243	0.0813638	0.498912	0.757052	0.749631	0.859886
Jiangxi	2022	0.370902	0.174986	0.315611	0.207067	0.270942	0.855113	0.694872	0.844799	0.736908	0.324705	0.287023	0.404596	0.366665	0.351966	0.165022	0.580153	0.119741	0.0898527	0.0909987	0.497725	0.799978	0.69017	0.922368
Jiangxi	2023	0.37527	0.169506	0.318726	0.215768	0.276861	0.85593	0.700977	0.844799	0.952408	0.32268	0.285743	0.44133	0.367828	0.515183	0.16756	0.000149693	0.0466297	0.0826136	0.0979275	0.495349	0.825854	0.721779	0.915282
Shandong	2011	0.708376	0.979506	0.748162	0.905465	0.561084	0.340835	0.0001	0.00140824	0.498875	0.583702	0.330112	0.106455	0.273494	0.0295527	0.629025	0.415007	0.161696	0.172456	0.225547	0.0802663	0.0683552	0.0802692	0.0670697
Shandong	2012	0.708477	0.935305	0.759087	0.929722	0.610772	0.337156	0.0175407	0.00224424	0.56863	0.627275	0.322429	0.135156	0.267424	0.0827742	0.700068	0.495795	0.200173	0.174532	0.230165	0.0814539	0.168403	0.239754	0.234697
Shandong	2013	0.715671	0.892292	0.708618	0.953853	0.574084	0.342216	0.0393401	0.0001	0.654083	0.692655	0.323427	0.165664	0.301921	0.0970493	0.740347	0.550472	0.248899	0.162336	0.232952	0.0820477	0.258505	0.361873	0.470444
Shandong	2014	0.719712	0.848776	0.735137	0.981123	0.582809	0.348649	0.0517568	0.0433645	0.790373	0.729096	0.303658	0.196542	0.288068	0.0931743	0.864673	0.568645	0.275023	0.330835	0.237267	0.0838292	0.361566	0.306549	0.535986
Shandong	2015	0.718964	0.810785	0.74472	1.0001	0.653801	0.35509	0.0843917	0.0548291	0.673665	0.75766	0.297047	0.223618	0.281947	0.17336	0.936034	0.709583	0.32686	0.0110424	0.238394	0.0850169	0.409394	0.340204	0.819547
Shandong	2016	0.715457	0.770374	0.774891	0.73195	0.676662	0.364974	0.0988229	0.0663608	0.869434	0.739472	0.271712	0.250063	0.262964	0.194943	0.978533	0.694149	0.379841	0.0259213	0.241652	0.0867983	0.447464	0.418906	0.696853
Shandong	2017	0.724304	0.731835	0.779477	0.758079	0.68202	0.388169	0.147476	0.101023	0.797287	0.724389	0.248857	0.280119	0.265698	0.231267	1.0001	0.701617	0.45858	0.295	0.24146	0.0867983	0.527949	0.563992	0.665616
Shandong	2018	0.722267	0.691653	0.786368	0.778531	0.675029	0.415729	0.213332	0.133451	0.76724	0.745284	0.241928	0.310588	0.260847	0.276913	0.973142	0.734651	0.498567	0.139093	0.205475	0.0873922	0.60286	0.557895	0.811697
Shandong	2019	0.712822	0.651196	0.791793	0.798488	0.679813	0.45087	0.27157	0.164792	0.682733	0.767581	0.269911	0.348781	0.252563	0.354147	0.924299	0.791654	0.607914	0.280175	0.215281	0.0873922	0.663089	0.618788	0.838033
Shandong	2020	0.709928	0.617452	0.795196	0.819969	0.691268	0.471198	0.308386	0.169431	0.909733	0.809765	0.275127	0.37404	0.249164	0.439039	0.90971	0.78379	0.880138	0.249932	0.220118	0.087986	0.709764	0.668297	0.855433
Shandong	2021	0.713841	0.591881	0.795203	0.836668	0.698144	0.485042	0.345508	0.188515	0.974374	0.913612	0.272074	0.426757	0.251407	0.555795	0.551004	0.755581	0.89057	0.260656	0.251077	0.087986	0.787112	0.742778	0.885958
Shandong	2022	0.714863	0.577269	0.782242	0.862644	0.703643	0.497612	0.365226	0.206633	0.989409	0.967486	0.270078	0.460754	0.258708	0.685268	0.381007	0.823203	0.863851	0.743836	0.228876	0.0873922	0.840783	0.685197	0.949251
Shandong	2023	0.717398	0.569506	0.787244	0.8972	0.717867	0.507858	0.38354	0.213015	0.996068	1.0001	0.264792	0.503794	0.257562	0.786059	0.208473	0.000168033	0.365887	0.0156065	0.300978	0.0873922	0.873582	0.727401	0.947603
Henan	2011	0.931381	1.0001	0.773247	0.786116	0.703477	0.05966	0.220261	0.533323	0.650318	0.486872	0.495228	0.0701336	0.391309	0.0403255	0.253192	0.353564	0.0544075	0.0226174	0.138499	0.428247	0.0250257	0.0623105	0.11139
Henan	2012	0.931615	0.96631	0.781712	0.813036	0.748879	0.0445944	0.223057	0.521986	0.671344	0.5243	0.483412	0.095295	0.385581	0.114525	0.250972	0.405981	0.0621854	0.0210622	0.142588	0.450219	0.129184	0.181294	0.259605
Henan	2013	0.935648	0.924301	0.745437	0.833945	0.725317	0.0278141	0.212258	0.481702	0.720807	0.566494	0.478541	0.121283	0.414107	0.15089	0.281419	0.463454	0.0882182	0.0619642	0.150257	0.485254	0.222021	0.294722	0.496226
Henan	2014	0.939247	0.857178	0.765687	0.858596	0.732792	0.0146316	0.21343	0.495476	0.549072	0.595031	0.45146	0.147041	0.401343	0.110612	0.248435	0.487057	0.115715	0.050202	0.154149	0.514352	0.33494	0.249101	0.536476
Henan	2015	0.942313	0.775899	0.782481	0.876189	0.821822	0.0001	0.220255	0.500186	0.946884	0.602523	0.431011	0.169949	0.391297	0.170073	0.229723	0.582467	0.1498	0.0728487	0.158025	0.54048	0.386556	0.286427	0.799454
Henan	2016	0.945426	0.696904	0.787431	0.736275	0.825369	0.00163187	0.230272	0.496523	0.877224	0.6154	0.4007	0.191749	0.389697	0.273932	0.287445	0.593819	0.191252	0.0599883	0.156142	0.558295	0.427767	0.382008	0.710104
Henan	2017	0.962528	0.618821	0.792141	0.750105	0.828711	0.0132965	0.269305	0.515193	0.70492	0.596122	0.350568	0.218162	0.396344	0.338188	0.32265	0.674558	0.253245	0.0987781	0.161916	0.571953	0.515596	0.541441	0.683034
Henan	2018	0.965868	0.585945	0.79445	0.762635	0.844619	0.0328413	0.312708	0.529424	0.723696	0.612007	0.336494	0.246877	0.396675	0.449483	0.361026	0.736556	0.31103	0.122052	0.162799	0.573734	0.595252	0.533869	0.813379
Henan	2019	0.961308	0.5622	0.800624	0.774138	0.850551	0.0694815	0.351607	0.536048	0.770555	0.675728	0.321732	0.281313	0.389854	0.474729	0.264293	0.77968	0.311762	0.128167	0.174377	0.57611	0.661737	0.585676	0.838728
Henan	2020	0.9596	0.549415	0.821194	0.782187	0.867186	0.0958164	0.381098	0.533001	0.841541	0.790724	0.367686	0.305704	0.375359	0.550305	0.362295	0.842725	0.39924	0.0662169	0.184018	0.575516	0.708707	0.624089	0.853972
Henan	2021	0.960727	0.526127	0.821199	0.796253	0.831263	0.128594	0.411425	0.569264	0.624178	0.835017	0.360374	0.342526	0.375982	0.624364	0.336605	0.746952	0.336377	0.289537	0.223012	0.574922	0.785781	0.705428	0.880923
Henan	2022	0.961146	0.593707	0.845756	0.811975	0.862542	0.169842	0.444585	0.570388	0.838368	0.871684	0.358011	0.372595	0.360894	0.779217	0.260487	0.817038	0.301193	0.451227	0.249967	0.573734	0.841604	0.637907	0.934774
Henan	2023	0.963488	0.549872	0.852424	0.831563	0.841481	0.185787	0.456794	0.573578	0.529568	0.819035	0.341845	0.407617	0.358139	0.973409	0.268416	0.000168625	0.127839	0.145484	0.281495	0.572547	0.868392	0.693269	0.927251
Hubei	2011	0.520683	0.697751	0.359964	0.262355	0.301124	0.507724	0.154472	0.80956	0.389293	0.32707	0.496984	0.0843676	0.489862	0.050949	0.0254727	0.276871	0.0462637	0.0679485	0.0540087	0.0422615	0.0715839	0.0929692	0.0482551
Hubei	2012	0.525239	0.680665	0.374262	0.282789	0.313448	0.507724	0.154472	0.80956	0.593231	0.366027	0.486034	0.111286	0.47146	0.0619709	0.286177	0.308352	0.059852	0.105428	0.0540087	0.0458245	0.172514	0.236401	0.241771
Hubei	2013	0.527033	0.656992	0.411452	0.300806	0.315514	0.511878	0.229998	0.80552	0.411101	0.400857	0.474213	0.139961	0.418396	0.0661177	0.265561	0.342428	0.0747214	0.116412	0.0629181	0.0493874	0.262229	0.377689	0.498548
Hubei	2014	0.527432	0.618497	0.421255	0.316784	0.32609	0.517027	0.236426	0.796343	0.749481	0.424617	0.439756	0.169851	0.405831	0.0639845	0.241457	0.356005	0.0915581	0.0873401	0.0689424	0.0505751	0.376031	0.335342	0.540226
Hubei	2015	0.516923	0.586496	0.427976	0.329999	0.368264	0.537262	0.269476	0.789531	0.736032	0.447031	0.424231	0.19555	0.386229	0.0618948	0.32931	0.453681	0.109356	0.0815649	0.0723656	0.0529504	0.425366	0.361893	0.80444
Hubei	2016	0.509769	0.560221	0.428961	0.308854	0.35316	0.54557	0.289523	0.802342	0.351125	0.491726	0.424298	0.218312	0.377532	0.0532523	0.225917	0.518435	0.134428	0.12637	0.0742391	0.0523565	0.459849	0.449866	0.691004
Hubei	2017	0.517171	0.537188	0.431047	0.319966	0.3595	0.559666	0.337218	0.806905	0.659908	0.479643	0.375873	0.246395	0.382728	0.0892588	0.150433	0.525896	0.183565	0.116273	0.0760874	0.0529504	0.541812	0.616888	0.689433
Hubei	2018	0.516959	0.514734	0.432999	0.326718	0.358658	0.590741	0.3755	0.814314	0.745385	0.485993	0.339798	0.27651	0.380142	0.115504	0.208156	0.577997	0.192121	0.109303	0.0803948	0.0535442	0.625607	0.626537	0.842626
Hubei	2019	0.507954	0.496558	0.438687	0.33359	0.344051	0.621559	0.413916	0.82948	0.661636	0.524528	0.312807	0.313013	0.364151	0.16092	0.43651	0.609378	0.255991	0.249797	0.0870414	0.054138	0.686372	0.678309	0.867982
Hubei	2020	0.518371	0.400557	0.456639	0.341912	0.344357	0.630787	0.437608	0.831911	0.61376	0.575075	0.359063	0.310818	0.354462	0.215912	0.34834	0.639312	0.314965	0.00911775	0.0911877	0.054138	0.720279	0.720074	0.861243
Hubei	2021	0.527234	0.393251	0.456633	0.349861	0.349065	0.637394	0.453937	0.834371	0.880373	0.655784	0.351735	0.361273	0.3632	0.295125	0.177709	0.619267	0.315605	0.0259587	0.099502	0.0529504	0.8016	0.797776	0.877554
Hubei	2022	0.532667	0.414712	0.475472	0.360961	0.346105	0.643919	0.487317	0.835227	0.722062	0.708046	0.350161	0.398743	0.348249	0.389845	0.424775	0.680463	0.353488	0.249882	0.113867	0.0523565	0.846421	0.742853	0.928296
Hubei	2023	0.540378	0.390054	0.477215	0.368265	0.350685	0.648971	0.499526	0.841608	0.915132	0.721669	0.342885	0.439651	0.353729	0.486634	0.156459	0.000160803	0.155657	0.154781	0.136196	0.0517627	0.872532	0.78311	0.927636
Hunan	2011	0.546472	0.758063	0.407005	0.365256	0.371402	0.66569	0.271026	0.781847	0.43788	0.347824	0.534993	0.0725361	0.445881	0.132311	0.209742	0.290135	0.0409565	0.0383653	0.0509044	0.393212	0.0288787	0.107197	0.067091
Hunan	2012	0.553695	0.753063	0.399854	0.384386	0.387029	0.656385	0.255466	0.763318	0.708021	0.380008	0.515238	0.0968709	0.464403	0.15555	0.224648	0.329476	0.0539043	0.0512397	0.0529967	0.458532	0.132327	0.249378	0.247225
Hunan	2013	0.562774	0.747137	0.456372	0.402845	0.369654	0.657674	0.24742	0.754157	0.27867	0.391347	0.477711	0.122833	0.398524	0.170667	0.238286	0.380103	0.0690939	0.0605061	0.057158	0.525634	0.218577	0.333953	0.504387
Hunan	2014	0.570296	0.745018	0.45904	0.420804	0.379299	0.658226	0.247548	0.752437	0.731178	0.412584	0.441401	0.149471	0.402754	0.197301	0.25573	0.410289	0.082545	0.116681	0.0597739	0.608176	0.319657	0.291209	0.512356
Hunan	2015	0.567176	0.730105	0.460823	0.437544	0.39115	0.660003	0.259293	0.749109	0.819023	0.43908	0.436822	0.173558	0.397599	0.232232	0.316941	0.497579	0.094166	0.00274964	0.0598138	0.684779	0.361954	0.332901	0.802672
Hunan	2016	0.57219	0.715771	0.463744	0.45289	0.385805	0.660133	0.281831	0.746908	0.674494	0.475757	0.429656	0.197786	0.399063	0.259127	0.311232	0.536944	0.100571	0.0450188	0.061204	0.763164	0.396528	0.422857	0.661687
Hunan	2017	0.541215	0.682821	0.465815	0.464753	0.388522	0.661798	0.297935	0.745216	0.711857	0.405159	0.333341	0.223757	0.36672	0.308582	0.263976	0.575693	0.136075	0.0430869	0.0621295	0.816608	0.476902	0.577434	0.663583
Hunan	2018	0.527355	0.658721	0.468596	0.471069	0.382054	0.665513	0.309339	0.744617	0.852054	0.417202	0.318737	0.253639	0.350372	0.340525	0.283957	0.681004	0.175833	0.126547	0.0632573	0.853425	0.551369	0.555314	0.79831
Hunan	2019	0.528124	0.634456	0.470452	0.481118	0.375918	0.684636	0.361881	0.749738	0.763925	0.502026	0.346074	0.287281	0.349157	0.395242	0.231626	0.720071	0.194271	0.117977	0.064332	0.87124	0.603483	0.60544	0.843632
Hunan	2020	0.546351	0.372703	0.473028	0.489953	0.381059	0.692049	0.386897	0.752249	0.806735	0.592011	0.383673	0.318017	0.363824	0.442781	0.248118	0.726717	0.265095	0.169137	0.0651832	0.877178	0.646535	0.676147	0.841158
Hunan	2021	0.553195	0.356721	0.473028	0.496548	0.388624	0.698613	0.449994	0.764728	0.896947	0.604237	0.354193	0.362208	0.370342	0.52111	0.303938	0.698248	0.222226	0.136255	0.163117	0.878366	0.725114	0.735518	0.863926
Hunan	2022	0.558931	0.349415	0.424426	0.502548	0.381429	0.703095	0.505631	0.780982	0.732694	0.644703	0.356975	0.394527	0.435049	0.593283	0.321381	0.732406	0.195507	0.227592	0.16376	0.879554	0.775491	0.687967	0.917006
Hunan	2023	0.567042	0.343936	0.430806	0.50885	0.387807	0.706658	0.548363	0.806509	0.93483	0.647895	0.348619	0.430041	0.43499	0.748263	0.289031	0.000169245	0.071473	0.263034	0.156177	0.877772	0.798323	0.715011	0.910989
Guangdong	2011	0.294762	0.631301	0.270625	0.175139	0.170047	0.667361	0.309784	0.876596	0.881391	0.337763	0.185426	0.119217	0.325847	0.0169403	0.280468	0.309321	0.136304	0.216807	0.563584	0.0493874	0.13237	0.147361	0.130247
Guangdong	2012	0.298546	0.61963	0.270821	0.181313	0.161717	0.661632	0.31103	0.875335	0.901399	0.359908	0.184672	0.147891	0.331651	0.0416086	0.367686	0.397026	0.155885	0.103178	0.589782	0.0499812	0.235603	0.283113	0.278654
Guangdong	2013	0.303046	0.385488	0.254919	0.186457	0.164294	0.663699	0.334154	0.871025	0.731557	0.38348	0.180381	0.175507	0.368275	0.0629891	0.334702	0.438019	0.200585	0.403136	0.613372	0.0511689	0.325921	0.400311	0.507284
Guangdong	2014	0.306127	0.416995	0.254955	0.191547	0.169575	0.65572	0.318441	0.869668	0.80072	0.406844	0.172365	0.205927	0.373493	0.0817965	0.0841469	0.410291	0.231605	0.687236	0.652816	0.0517627	0.425581	0.334032	0.52938
Guangdong	2015	0.30874	0.441653	0.254997	0.196405	0.151001	0.646059	0.311616	0.867789	0.799797	0.430079	0.169456	0.234728	0.377898	0.0880044	0.0784381	0.597379	0.28852	0.241552	0.658895	0.0517627	0.481309	0.375367	0.780405
Guangdong	2016	0.311771	0.468593	0.255066	0.173305	0.150045	0.639652	0.312409	0.871905	0.850846	0.475474	0.168469	0.26448	0.382962	0.105239	0.0679719	0.526417	0.422894	0.444158	0.66317	0.0523565	0.512634	0.455991	0.612662
Guangdong	2017	0.272119	0.49873	0.25551	0.174833	0.150606	0.643464	0.316646	0.87075	0.933269	0.466649	0.147518	0.297226	0.314139	0.126194	0.160265	0.555079	0.576437	0.672167	0.70303	0.0529504	0.58978	0.637893	0.633661
Guangdong	2018	0.275527	0.526127	0.255602	0.176279	0.14868	0.681387	0.434305	0.87411	0.870475	0.494959	0.144154	0.333082	0.319816	0.151233	0.0505282	0.66939	0.621365	0.734514	0.717143	0.0529504	0.668406	0.641393	0.835952
Guangdong	2019	0.280655	0.558547	0.255324	0.178229	0.154714	0.689159	0.472123	0.877212	0.965921	0.56469	0.14811	0.375724	0.329098	0.184164	0.0800239	0.704626	0.727464	0.569992	0.719604	0.0523565	0.727689	0.70999	0.882407
Guangdong	2020	0.286861	0.60284	0.255794	0.181219	0.158132	0.697579	0.498201	0.881309	0.980293	0.623712	0.158343	0.409954	0.338874	0.262617	0.106982	0.828313	1.0001	0.555852	0.729284	0.0529504	0.764191	0.789078	0.855562
Guangdong	2021	0.28992	0.334803	0.2558	0.18341	0.159701	0.707314	0.533468	0.879812	0.982188	0.656548	0.147416	0.465819	0.344097	0.476496	0.207839	0.816293	0.842851	1.0001	0.342087	0.054138	0.827538	0.856099	0.86972
Guangdong	2022	0.293542	0.320648	0.222632	0.18581	0.161181	0.713115	0.542258	0.873517	0.954153	0.704223	0.151766	0.49919	0.421288	0.808649	0.0790724	0.785465	0.749928	0.694029	0.279358	0.0547318	0.885515	0.79149	0.934421
Guangdong	2023	0.295764	0.305123	0.222627	0.188053	0.160378	0.715856	0.554467	0.876707	0.948695	0.729408	0.149753	0.539082	0.425629	1.0001	0.044185	0.000169875	0.249997	0.669954	0.37886	0.0535442	0.908043	0.818116	0.940745
Guangxi	2011	0.38838	0.705579	0.217879	0.221773	0.178837	0.665379	0.601906	0.897757	0.659719	0.251504	0.665885	0.0446621	0.621655	0.00622383	0.261756	0.231723	0.0205054	0.0251525	0.0260648	0.108176	0.0388877	0.0741176	0.114628
Guangxi	2012	0.39404	0.667223	0.219727	0.234049	0.178378	0.656483	0.592413	0.890431	0.864035	0.265109	0.634993	0.0676794	0.626696	0.0108184	0.302669	0.2716	0.0422375	0.000898982	0.0296198	0.114114	0.138957	0.194213	0.276395
Guangxi	2013	0.397625	0.665853	0.226641	0.248158	0.19056	0.647122	0.584764	0.884751	0.835764	0.286609	0.617755	0.0909034	0.611158	0.0253278	0.320113	0.273683	0.0722508	0.00230394	0.0321441	0.119459	0.226132	0.291963	0.480032
Guangxi	2014	0.384006	0.653068	0.228731	0.262074	0.192168	0.642941	0.566682	0.87643	0.713041	0.302261	0.586139	0.1139	0.578694	0.0471818	0.350877	0.287948	0.076094	0.0234468	0.0360457	0.124209	0.327987	0.26446	0.522306
Guangxi	2015	0.397464	0.583205	0.231613	0.279849	0.179258	0.641281	0.548875	0.869445	0.870973	0.322535	0.581082	0.134137	0.595374	0.0606898	0.357537	0.366107	0.0862966	0.0117058	0.0398825	0.129554	0.375428	0.291209	0.85104
Guangxi	2016	0.39816	0.542109	0.235797	0.25904	0.177446	0.638071	0.48308	0.862524	0.928912	0.354585	0.581107	0.157203	0.584111	0.0858069	0.368321	0.421981	0.0695057	0.0193613	0.0455928	0.131335	0.412417	0.387941	0.751334
Guangxi	2017	0.386631	0.497817	0.239447	0.268925	0.171259	0.635696	0.563655	0.864924	0.953774	0.363311	0.591539	0.182158	0.552487	0.121873	0.398451	0.475971	0.0855646	0.0214524	0.0496595	0.131929	0.496837	0.541353	0.67952
Guangxi	2018	0.386795	0.458547	0.245123	0.2759	0.171553	0.648043	0.580631	0.866513	0.964666	0.380426	0.564408	0.210815	0.537289	0.164911	0.407648	0.483115	0.0975059	0.029905	0.0520103	0.133117	0.577924	0.527419	0.797747
Guangxi	2019	0.387901	0.425214	0.246074	0.282629	0.166348	0.652274	0.590215	0.865294	0.941509	0.428354	0.607472	0.242873	0.536721	0.188149	0.494867	0.549786	0.119879	0.0532161	0.0610891	0.133117	0.631415	0.567074	0.814967
Guangxi	2020	0.395664	0.386401	0.248827	0.287257	0.171195	0.658156	0.603145	0.861672	0.934122	0.462048	0.611196	0.272302	0.543113	0.24672	0.460614	0.665414	0.168879	0.00120157	0.0684783	0.133117	0.667423	0.608277	0.815811
Guangxi	2021	0.400278	0.375442	0.248822	0.286122	0.1733	0.652474	0.61409	0.872227	0.964192	0.511728	0.618204	0.312291	0.551229	0.360376	0.575742	0.557582	0.169611	0.0205663	0.116082	0.132523	0.733774	0.68487	0.839903
Guangxi	2022	0.406447	0.382292	0.220964	0.281515	0.174142	0.656252	0.627722	0.870326	0.911154	0.545394	0.618366	0.339927	0.646939	0.466544	0.585574	0.542328	0.160003	0.0168611	0.103704	0.132523	0.778923	0.628574	0.892262
Guangxi	2023	0.411768	0.369506	0.243393	0.283451	0.174436	0.658547	0.639931	0.876707	0.948139	0.569032	0.625745	0.371529	0.586719	0.592558	0.453636	0.00014436	0.053401	0.0464263	0.132907	0.132523	0.794828	0.660551	0.88106
Hainan	2011	0.049378	0.0950361	0.0213054	0.0265242	0.020409	0.9394	0.720182	0.955243	0.877863	0.0628208	1.0001	0.065277	0.514936	0.00757315	0.0397448	0.0777993	0.00664253	0.00136327	0.00159605	0.11352	0.062522	0.101264	0.136575
Hainan	2012	0.0504489	0.0905795	0.0227225	0.0291888	0.019146	0.942492	0.764238	0.948839	0.985858	0.0693078	0.953262	0.0914976	0.50326	0.014122	0.0340359	0.0910369	0.00970791	0.0024785	0.0023506	0.122428	0.167025	0.226241	0.299258
Hainan	2013	0.0500266	0.0820224	0.0233633	0.0308812	0.0207789	0.939625	0.740791	0.942652	0.961185	0.0744121	0.910404	0.116969	0.48769	0.0275658	0.0159579	0.102371	0.0142831	0.00196146	0.00287001	0.12896	0.257946	0.330718	0.5196
Hainan	2014	0.0507757	0.0802781	0.0232093	0.0320284	0.0202304	0.936969	0.762633	0.927442	0.926923	0.0831298	0.884092	0.145658	0.498962	0.0298433	0.0146893	0.10772	0.0171197	0.00333742	0.00349784	0.14143	0.363934	0.291884	0.527356
Hainan	2015	0.0498334	0.0777027	0.0238335	0.031597	0.0161354	0.934608	0.763243	0.913616	0.990428	0.0889615	0.882508	0.17007	0.477921	0.0336244	0.0216668	0.120917	0.0207799	0.00329396	0.00455919	0.1539	0.409717	0.353618	0.918478
Hainan	2016	0.0483864	0.0765612	0.0278143	0.0319725	0.0150638	0.935335	0.798479	0.931896	0.879591	0.100871	0.894628	0.195524	0.405475	0.0346969	0.0508453	0.131805	0.0197276	0.00439545	0.00499269	0.177653	0.448098	0.42394	0.671832
Hainan	2017	0.040906	0.0747712	0.0277069	0.0359872	0.0140433	0.934299	0.802263	0.928903	0.997626	0.102371	0.824377	0.222879	0.328221	0.0437052	0.0232526	0.146059	0.0283747	0.00175901	0.00580435	0.204376	0.5413	0.577109	0.643067
Hainan	2018	0.0411359	0.0718306	0.0278959	0.035687	0.0151914	0.938501	0.864274	0.935613	0.992511	0.106181	0.790491	0.250962	0.328548	0.0810759	0.0416477	0.16761	0.0336819	0.007324	0.0067464	0.218033	0.629579	0.582464	0.788398
Hainan	2019	0.0387237	0.0709447	0.0279181	0.0368494	0.0149235	0.94146	0.875823	0.919624	0.99933	0.118673	0.777087	0.280006	0.303068	0.0945503	0.0505282	0.185037	0.0544075	0.0124505	0.00738146	0.223378	0.683413	0.610689	0.805537
Hainan	2020	0.038765	0.0689539	0.0281604	0.039439	0.0149873	0.946597	0.885658	0.919528	0.990712	0.129373	0.78416	0.310119	0.300984	0.112606	0.0391105	0.197669	0.0909176	0.00472053	0.00851366	0.228722	0.718826	0.655906	0.801006
Hainan	2021	0.039285	0.0681365	0.0281594	0.0405842	0.0150511	0.949186	0.891872	0.907831	0.992606	0.145126	0.739388	0.356553	0.306406	0.142151	0.00961475	0.191892	0.0992902	0.0103365	0.0292905	0.228722	0.789018	0.735035	0.825344
Hainan	2022	0.0394432	0.069963	0.033983	0.0406629	0.0151276	0.952171	0.896322	0.905425	0.999354	0.166039	0.794229	0.383447	0.254008	0.166961	0.0203981	0.195519	0.0776038	0.0193595	0.0210595	0.227535	0.840939	0.671251	0.870426
Hainan	2023	0.0404409	0.0676799	0.0346467	0.0407606	0.0151786	0.953822	0.902427	0.899043	0.999937	0.177278	0.762143	0.424538	0.257696	0.18373	0.0248383	0.000110659	0.0389434	0.0246215	0.0360407	0.226347	0.854741	0.70379	0.87319
Chongqing	2011	0.218594	0.250762	0.08961	0.0790144	0.140183	0.872153	0.882136	0.891602	0.806971	0.0841994	0.317588	0.0602137	0.822416	0.013261	0.157093	0.146422	0.0356493	0.0222527	0.033136	0.241193	0.0827983	0.0808645	0.0622968
Chongqing	2012	0.22284	0.233516	0.0911574	0.080651	0.131713	0.871535	0.887288	0.88651	0.904193	0.0953124	0.309996	0.084006	0.826652	0.016791	0.17866	0.188678	0.0465382	0.0257398	0.0348448	0.263164	0.179682	0.217152	0.237616
Chongqing	2013	0.225351	0.217032	0.0868958	0.0834325	0.142888	0.870658	0.894161	0.880345	0.892377	0.104393	0.299002	0.108987	0.878639	0.0241742	0.0644831	0.207506	0.0582965	0.0451972	0.0360009	0.287511	0.265522	0.340303	0.496908
Chongqing	2014	0.226958	0.202739	0.0872148	0.0867857	0.142429	0.869792	0.893655	0.877269	0.933672	0.110996	0.279161	0.134737	0.882661	0.0206452	0.0670204	0.214623	0.094532	0.0317463	0.0370921	0.317796	0.373792	0.29998	0.545681
Chongqing	2015	0.229288	0.192018	0.0887377	0.0910386	0.130501	0.869145	0.895108	0.873	0.983419	0.122636	0.274475	0.160955	0.877874	0.0280848	0.062263	0.243839	0.187957	0.0367252	0.0370074	0.328485	0.42091	0.327166	0.822722
Chongqing	2016	0.230927	0.182379	0.0892603	0.0924671	0.133971	0.871337	0.89874	0.872671	0.9551	0.141344	0.275568	0.187927	0.879959	0.0290594	0.0597258	0.256096	0.112238	0.092276	0.0372814	0.333829	0.456572	0.406454	0.708617
Chongqing	2017	0.213762	0.174945	0.0898216	0.0950261	0.134188	0.872315	0.899576	0.871988	0.970372	0.135994	0.245614	0.216063	0.799296	0.0386104	0.0568713	0.255784	0.151493	0.00478943	0.038024	0.333235	0.532933	0.584394	0.664885
Chongqing	2018	0.214349	0.169333	0.0902326	0.100722	0.134111	0.87554	0.901261	0.874713	0.983395	0.148184	0.25329	0.245598	0.798162	0.0590954	0.0651174	0.269915	0.15497	0.00935762	0.0376986	0.335611	0.609572	0.553417	0.803735
Chongqing	2019	0.214168	0.165159	0.0903461	0.103478	0.133588	0.878477	0.905223	0.881305	0.981643	0.171385	0.245722	0.280525	0.796357	0.059296	0.0774866	0.286653	0.140421	0.100508	0.0383845	0.335017	0.66537	0.602568	0.837577
Chongqing	2020	0.21593	0.16357	0.0904443	0.105991	0.134379	0.880236	0.90728	0.884065	0.962535	0.204816	0.270417	0.312251	0.803147	0.0668779	0.0676547	0.306688	0.189696	0.0594111	0.039183	0.334423	0.704878	0.669127	0.830126
Chongqing	2021	0.218343	0.158091	0.0904412	0.108591	0.135833	0.881326	0.9083	0.885773	0.985976	0.219986	0.257992	0.357155	0.81368	0.0884601	0.0708263	0.298962	0.140604	0.101044	0.04071	0.333829	0.775585	0.727993	0.855214
Chongqing	2022	0.222928	0.168593	0.0860807	0.111091	0.133282	0.881764	0.908532	0.88628	0.912693	0.230781	0.258655	0.388492	0.875897	0.120032	0.0644831	0.289831	0.115852	0.10015	0.0420978	0.333235	0.827382	0.673853	0.908922
Chongqing	2023	0.224713	0.155808	0.0878033	0.112657	0.136229	0.882187	0.908532	0.889471	0.976971	0.237761	0.257678	0.427431	0.866754	0.144961	0.0606772	0.000121239	0.0521199	0.150683	0.0431662	0.332048	0.857067	0.712109	0.903811
Sichuan	2011	0.622945	0.891424	0.382212	0.25141	0.416332	0.653404	0.628271	0.627098	0.638337	0.382336	0.539486	0.0576304	0.573057	0.172239	0.49455	0.401545	0.0587082	0.0932679	0.0720998	0.0505751	0.0583461	0.102891	0.0766368
Sichuan	2012	0.628955	0.860831	0.391705	0.271617	0.413742	0.650876	0.637996	0.61242	0.776687	0.423015	0.524924	0.0815777	0.562834	0.227121	0.44095	0.481915	0.0858849	0.00320117	0.0757844	0.0517627	0.15594	0.23771	0.276523
Sichuan	2013	0.63061	0.837543	0.384633	0.291156	0.428515	0.653527	0.640212	0.609143	0.62065	0.438228	0.49284	0.106093	0.577529	0.268257	0.268099	0.545797	0.103637	0.0406858	0.0795458	0.0517627	0.241329	0.337346	0.492817
Sichuan	2014	0.629718	0.814712	0.392269	0.30677	0.426958	0.65487	0.643685	0.601457	0.782512	0.46	0.46947	0.131067	0.562706	0.271644	0.20879	0.608187	0.104597	0.036192	0.0825654	0.054138	0.345832	0.30383	0.487639
Sichuan	2015	0.631119	0.79389	0.402815	0.325205	0.429471	0.655377	0.646573	0.595372	0.866947	0.499814	0.464159	0.154307	0.546047	0.289485	0.311549	0.681797	0.134931	0.105417	0.0851764	0.0553257	0.387805	0.337009	0.828816
Sichuan	2016	0.633661	0.771333	0.414848	0.314856	0.439077	0.656562	0.651908	0.594689	0.902961	0.536659	0.452385	0.178998	0.529051	0.306908	0.316624	0.727453	0.188598	0.0858669	0.0892972	0.0559195	0.419917	0.416393	0.698553
Sichuan	2017	0.623569	0.749643	0.423981	0.326393	0.441501	0.666446	0.665869	0.599127	0.94911	0.546778	0.436777	0.205445	0.504051	0.348698	0.447293	0.752774	0.267154	0.124882	0.0919685	0.0559195	0.494971	0.585048	0.67675
Sichuan	2018	0.626215	0.72978	0.433098	0.340239	0.442114	0.675924	0.693187	0.633611	0.885582	0.566296	0.411945	0.233977	0.493297	0.370706	0.477423	0.964467	0.241853	0.10873	0.0970394	0.0571071	0.568759	0.573735	0.803255
Sichuan	2019	0.63132	0.7122	0.436403	0.346153	0.442726	0.693399	0.723625	0.623882	0.923514	0.62269	0.389973	0.26856	0.493771	0.264476	0.422238	0.947942	0.24437	0.189593	0.100617	0.0571071	0.622719	0.620762	0.832478
Sichuan	2020	0.641632	0.695077	0.442253	0.351561	0.446413	0.710204	0.749019	0.637976	0.850302	0.730571	0.433211	0.301085	0.495891	0.329336	0.537683	0.985415	0.329514	0.223898	0.100671	0.0571071	0.664792	0.671025	0.827827
Sichuan	2021	0.651492	0.678639	0.442247	0.357585	0.453391	0.715342	0.756076	0.643879	0.9372	0.74414	0.397748	0.343611	0.505918	0.450719	0.551955	0.9786	0.313501	0.258658	0.134179	0.0559195	0.734105	0.732021	0.857562
Sichuan	2022	0.66644	0.722474	0.439723	0.364332	0.444257	0.719262	0.762022	0.650158	0.854351	0.782871	0.397584	0.371951	0.524883	0.555265	0.512311	1.0001	0.283762	0.103657	0.144393	0.0559195	0.777719	0.686457	0.908264
Sichuan	2023	0.668875	0.691881	0.442554	0.372164	0.454883	0.722369	0.762022	0.659731	0.946209	0.792468	0.3807	0.40568	0.523123	0.640918	0.551955	0.000197715	0.131637	0.382447	0.161658	0.0559195	0.80451	0.721865	0.914612
Guizhou	2011	0.324283	0.536351	0.167568	0.132646	0.108291	0.874256	0.917878	0.886736	0.391614	0.0760803	0.483465	0.00580912	0.673404	0.0001	0.107617	0.204952	0.0107144	0.0151811	0.0219851	0.123022	0.00246773	0.041276	0.0967086
Guizhou	2012	0.334907	0.533908	0.169619	0.151897	0.144623	0.868509	0.917994	0.87651	0.871825	0.0981232	0.494256	0.022859	0.690796	0.00480235	0.110788	0.266309	0.016891	0.0054964	0.0252079	0.150338	0.103225	0.165121	0.274179
Guizhou	2013	0.348528	0.529671	0.125501	0.162014	0.127822	0.869574	0.923915	0.865555	0.639711	0.116529	0.483016	0.0419497	1.0001	0.0140123	0.127598	0.294586	0.0325839	0.0105005	0.0289103	0.178841	0.188722	0.235647	0.448305
Guizhou	2014	0.356831	0.52568	0.133926	0.178426	0.141663	0.864121	0.924251	0.860916	0.851794	0.153555	0.52518	0.0619244	0.960804	0.0414801	0.115546	0.329071	0.0501526	0.0138453	0.0335842	0.209126	0.297013	0.213064	0.573956
Guizhou	2015	0.358521	0.521351	0.146747	0.187231	0.150861	0.860758	0.922438	0.859467	0.94705	0.203972	0.59471	0.0804117	0.877537	0.0493032	0.0901729	0.393129	0.0630089	0.0175269	0.037994	0.241786	0.342388	0.250093	0.857581
Guizhou	2016	0.362112	0.510086	0.150219	0.14695	0.157711	0.860783	0.922713	0.854202	0.92188	0.233118	0.596852	0.0985831	0.865946	0.06188	0.143773	0.463105	0.0840548	0.0131836	0.0405502	0.278604	0.384843	0.349225	0.736168
Guizhou	2017	0.366224	0.369059	0.154214	0.157537	0.154918	0.872048	0.92441	0.853931	0.936892	0.258861	0.571084	0.118702	0.853135	0.0800192	0.100322	0.450356	0.0967281	0.0153383	0.0454612	0.320171	0.486155	0.499533	0.659378
Guizhou	2018	0.354249	0.340264	0.156993	0.17226	0.131611	0.880728	0.93831	0.841509	0.931114	0.27558	0.554757	0.140583	0.804732	0.11562	0.0955646	0.489195	0.102767	0.029138	0.0471063	0.35877	0.57143	0.465586	0.778743
Guizhou	2019	0.354538	0.310808	0.160328	0.180402	0.130526	0.889574	0.949982	0.876321	0.966797	0.297486	0.516748	0.167455	0.787279	0.132792	0.0911244	0.73495	0.0970026	0.0246379	0.050359	0.378366	0.625818	0.474173	0.800678
Guizhou	2020	0.35413	0.280465	0.162092	0.187775	0.131343	0.895764	0.954786	0.872205	0.945013	0.335664	0.541745	0.190344	0.776848	0.163065	0.165974	0.753643	0.11448	0.0231486	0.0564369	0.393805	0.670135	0.499053	0.795359
Guizhou	2021	0.350681	0.273159	0.162094	0.197055	0.136101	0.899701	0.96318	0.875993	0.966087	0.362763	0.529985	0.221699	0.767845	0.178838	0.198007	0.537671	0.0876692	0.0545751	0.0817598	0.415777	0.740067	0.586767	0.824083
Guizhou	2022	0.346513	0.307406	0.165111	0.20462	0.138614	0.900503	0.963473	0.892662	0.900641	0.380379	0.539488	0.243672	0.741719	0.200528	0.13965	0.509281	0.07129	0.00279726	0.0799027	0.425278	0.783093	0.525063	0.854494
Guizhou	2023	0.345516	0.287315	0.17197	0.209393	0.139265	0.901447	0.963473	0.895852	0.942707	0.384032	0.526001	0.272355	0.706394	0.242829	0.111105	0.00014774	0.0275512	0.0048634	0.0910013	0.422903	0.812148	0.582985	0.839921
Yunnan	2011	0.432478	0.762356	0.233982	0.191246	0.209925	0.724742	0.712227	0.726008	0.529159	0.168839	0.604169	0.0231431	0.653355	0.0578577	0.183735	0.301567	0.0251263	0.0124459	0.0313473	0.0559195	0.0119602	0.0827099	0.0687743
Yunnan	2012	0.449101	0.726127	0.240678	0.209804	0.211673	0.711055	0.668464	0.693937	0.626475	0.199221	0.611208	0.0427763	0.662264	0.0684734	0.198324	0.381612	0.0358323	0.00750322	0.0348351	0.0612639	0.109489	0.208857	0.279933
Yunnan	2013	0.464069	0.702954	0.237974	0.224578	0.229112	0.69868	0.671785	0.676942	0.708684	0.229773	0.610032	0.0632878	0.698426	0.0998744	0.276979	0.396597	0.0523487	0.0136295	0.0391151	0.0695774	0.201637	0.291388	0.514827
Yunnan	2014	0.467111	0.682872	0.245443	0.235491	0.233794	0.687654	0.656871	0.662944	0.791344	0.246625	0.591188	0.0822009	0.679322	0.107372	0.228771	0.437409	0.0681331	0.0132315	0.041482	0.0826416	0.312769	0.273032	0.528443
Yunnan	2015	0.466532	0.666041	0.252919	0.244391	0.22494	0.680616	0.648184	0.656208	0.756703	0.25636	0.574412	0.102504	0.654994	0.11614	0.229088	0.472036	0.0969111	0.0229684	0.0436395	0.0903613	0.357412	0.301786	0.844072
Yunnan	2016	0.465141	0.664045	0.260844	0.252506	0.227976	0.675395	0.648471	0.647204	0.79454	0.276686	0.56472	0.122596	0.629326	0.113908	0.243678	0.524563	0.140147	0.0421177	0.045538	0.0998625	0.394896	0.389847	0.726827
Yunnan	2017	0.440584	0.621155	0.26729	0.259588	0.231587	0.680515	0.654124	0.633726	0.903909	0.29618	0.542949	0.144356	0.571037	0.114062	0.186906	0.496531	0.198023	0.0015265	0.0490638	0.108176	0.477038	0.547978	0.657449
Yunnan	2018	0.447154	0.582429	0.274446	0.196158	0.233768	0.700988	0.68516	0.635209	0.935116	0.315362	0.531221	0.167755	0.563546	0.115442	0.308695	0.61967	0.190245	0.0207305	0.050362	0.111145	0.560445	0.540004	0.785241
Yunnan	2019	0.450314	0.566543	0.27819	0.197733	0.23498	0.719743	0.716598	0.627379	0.628701	0.38258	0.496701	0.197061	0.55933	0.160713	0.2367	0.821978	0.171532	0.0188494	0.0580738	0.111145	0.608111	0.564381	0.812269
Yunnan	2020	0.453654	0.550785	0.286714	0.20319	0.238284	0.730109	0.73244	0.629233	0.710129	0.462637	0.558274	0.221333	0.5442	0.172699	0.52912	0.809421	0.233115	0.0547847	0.0598533	0.111145	0.646922	0.600759	0.810225
Yunnan	2021	0.458094	0.532977	0.286719	0.207122	0.242672	0.743212	0.755283	0.642737	0.877295	0.497698	0.542086	0.256346	0.551015	0.189031	0.716878	0.676711	0.218657	0.0455002	0.08465	0.111145	0.717701	0.665349	0.823832
Yunnan	2022	0.462918	0.550328	0.295486	0.212761	0.246206	0.748754	0.755918	0.65654	0.80825	0.520784	0.526678	0.280878	0.538198	0.194676	0.567496	0.653676	0.218977	0.0649749	0.0806586	0.111145	0.768531	0.608909	0.869191
Yunnan	2023	0.468665	0.531607	0.295599	0.220329	0.248247	0.754444	0.768127	0.659731	0.840959	0.536937	0.532659	0.312242	0.546527	0.214923	0.597309	0.00015716	0.106336	0.0543035	0.10012	0.111145	0.796338	0.648499	0.859268
Shaanxi	2011	0.269065	0.366388	0.178787	0.157644	0.148833	0.715186	0.930447	0.896133	0.819639	0.148687	0.368573	0.0312547	0.493717	0.0137721	0.154556	0.245649	0.0275512	0.0444556	0.0635084	0.289886	0.0772664	0.0457012	0.136809
Shaanxi	2012	0.27283	0.372246	0.179222	0.170263	0.15664	0.669462	0.927138	0.892416	0.879686	0.168572	0.357854	0.0519471	0.501222	0.0285879	0.154873	0.277032	0.0442049	0.0452833	0.0690705	0.321359	0.175872	0.182366	0.294784
Shaanxi	2013	0.274848	0.360374	0.16891	0.177997	0.151524	0.66675	0.926858	0.886768	0.807587	0.189651	0.355433	0.0727944	0.54314	0.0513326	0.132989	0.308793	0.0481395	0.108884	0.0543825	0.354613	0.261928	0.276287	0.483718
Shaanxi	2014	0.274396	0.352155	0.171448	0.185495	0.149228	0.682976	0.928109	0.884751	0.817342	0.204228	0.333435	0.0944996	0.532509	0.0541192	0.200227	0.328177	0.053584	0.00545441	0.0523944	0.388461	0.368798	0.262515	0.557123
Shaanxi	2015	0.275864	0.353981	0.173024	0.194179	0.150108	0.680507	0.926284	0.879681	0.823948	0.210055	0.334147	0.114047	0.530346	0.0514294	0.107617	0.383065	0.0502899	0.00939158	0.0530023	0.415777	0.415443	0.300119	0.818887
Shaanxi	2016	0.275367	0.357634	0.175266	0.156818	0.157673	0.678949	0.925685	0.87761	0.850326	0.22406	0.328995	0.132325	0.521052	0.0620846	0.0923931	0.399779	0.0675383	0.0918836	0.0572078	0.43181	0.450429	0.389265	0.703284
Shaanxi	2017	0.261366	0.358547	0.177061	0.162143	0.148769	0.680222	0.9248	0.876854	0.846016	0.231527	0.298947	0.15475	0.481024	0.0719865	0.171683	0.401325	0.0827737	0.048446	0.0632698	0.437155	0.526429	0.534377	0.660395
Shaanxi	2018	0.263149	0.358091	0.178886	0.167368	0.152826	0.683744	0.929592	0.876238	0.909639	0.244726	0.281081	0.179248	0.479275	0.108032	0.253192	0.461196	0.0845581	0.0886922	0.0646446	0.43953	0.60084	0.536656	0.792169
Shaanxi	2019	0.265848	0.357634	0.180445	0.168854	0.153476	0.721862	0.931485	0.874219	0.847437	0.268856	0.289944	0.207996	0.480589	0.138272	0.521508	0.503417	0.113519	0.0926365	0.0667457	0.438936	0.6593	0.600147	0.828505
Shaanxi	2020	0.267738	0.279552	0.188366	0.173113	0.159051	0.722724	0.933249	0.874397	0.874217	0.311112	0.32627	0.233592	0.460067	0.175631	0.524045	0.54614	0.161742	0.136681	0.0612351	0.438936	0.705193	0.644966	0.840748
Shaanxi	2021	0.269606	0.269963	0.188365	0.176375	0.15849	0.724418	0.935129	0.875769	0.769797	0.331991	0.304065	0.27049	0.464318	0.21482	0.472666	0.510833	0.153094	0.19775	0.0749518	0.438342	0.779637	0.723325	0.863253
Shaanxi	2022	0.271116	0.287315	0.1615	0.179593	0.161998	0.733607	0.939054	0.870326	0.869173	0.355444	0.295314	0.295278	0.562695	0.252692	0.459662	0.539491	0.164166	0.00873379	0.0762631	0.437748	0.824442	0.666882	0.919973
Shaanxi	2023	0.272937	0.273616	0.164502	0.18313	0.165289	0.734294	0.939054	0.857562	0.877579	0.36544	0.294728	0.328542	0.555378	0.297847	0.493281	0.000146166	0.0675383	0.0977189	0.0888089	0.437748	0.855659	0.725671	0.921846
Gansu	2011	0.263395	0.37671	0.181467	0.154146	0.125857	0.883874	0.588573	0.557659	0.700279	0.077893	0.513675	0.0001	0.471501	0.0143949	0.0464051	0.174929	0.0184465	0.00408851	0.0205212	0.286917	0.00662202	0.0120063	0.145056
Gansu	2012	0.263729	0.365814	0.18235	0.164901	0.136242	0.877001	0.556006	0.537286	0.759497	0.0917459	0.525004	0.016969	0.469473	0.0353997	0.0590914	0.222536	0.0219237	0.013825	0.0219143	0.31839	0.113665	0.123568	0.326554
Gansu	2013	0.267416	0.356816	0.18028	0.175413	0.141714	0.873376	0.531514	0.488093	0.696419	0.104719	0.527971	0.0339672	0.484839	0.054648	0.0644831	0.255059	0.0340937	0.0108596	0.0231651	0.35105	0.204177	0.213302	0.534963
Gansu	2014	0.270148	0.348121	0.182271	0.185011	0.14424	0.869314	0.531075	0.454978	0.61698	0.112934	0.500378	0.0517299	0.484772	0.0648772	0.0673376	0.269471	0.0439761	0.0163321	0.0236135	0.387867	0.314664	0.19959	0.60954
Gansu	2015	0.272239	0.341667	0.183752	0.195512	0.143717	0.868864	0.524872	0.430837	0.760752	0.121331	0.534148	0.0687698	0.484858	0.0740456	0.0714606	0.365754	0.0524402	0.0127756	0.0249988	0.425278	0.361093	0.23523	0.910062
Gansu	2016	0.27385	0.333625	0.185407	0.136605	0.138984	0.875189	0.579404	0.394598	0.682118	0.125876	0.518981	0.0822197	0.483279	0.0814565	0.0749493	0.35917	0.0644272	0.0200883	0.0250885	0.450219	0.403313	0.329302	0.644991
Gansu	2017	0.24087	0.32589	0.187542	0.145255	0.137504	0.887739	0.688798	0.467681	0.817129	0.108125	0.436735	0.0982158	0.401224	0.0894753	0.0774866	0.383221	0.112192	0.0205297	0.025903	0.471596	0.485322	0.463703	0.631913
Gansu	2018	0.242285	0.320028	0.188479	0.151606	0.143309	0.889594	0.744539	0.502512	0.819236	0.116231	0.423146	0.117024	0.401867	0.111978	0.0651174	0.499132	0.13182	0.0239005	0.0275076	0.494162	0.558302	0.438163	0.743647
Gansu	2019	0.246098	0.313566	0.187147	0.156977	0.144738	0.892812	0.750192	0.53129	0.959078	0.134784	0.456951	0.138331	0.414276	0.163042	0.0974676	0.527387	0.143441	0.00988162	0.0288126	0.499506	0.614313	0.486239	0.757748
Gansu	2020	0.252687	0.26357	0.188641	0.165689	0.149789	0.893548	0.760118	0.529047	0.906418	0.152346	0.504731	0.156812	0.425048	0.187056	0.110471	0.570844	0.189101	0.0332555	0.0308494	0.500694	0.660717	0.513234	0.766696
Gansu	2021	0.257032	0.255808	0.188641	0.172878	0.153527	0.898189	0.834624	0.47234	0.870428	0.179655	0.506075	0.184931	0.434916	0.223457	0.121254	0.542309	0.154101	0.0588542	0.0548785	0.500694	0.737109	0.599138	0.81432
Gansu	2022	0.261238	0.271333	0.190311	0.18282	0.157801	0.898086	0.841381	0.449136	0.884658	0.199263	0.513969	0.20385	0.43958	0.243555	0.162485	0.552955	0.150807	0.0215494	0.0523444	0.500694	0.773069	0.545174	0.855005
Gansu	2023	0.266342	0.259004	0.201693	0.192021	0.158808	0.898813	0.847486	0.417228	0.911329	0.219339	0.525809	0.228801	0.419125	0.2626	0.17422	0.000146763	0.0579762	0.0393085	0.0657882	0.499506	0.802394	0.610108	0.859363
Qinghai	2011	0.0302781	0.0465932	0.0219434	0.0254957	0.00961664	0.994857	0.994026	0.999854	0.932583	0.0001	0.3503	0.0137399	0.27301	0.00486957	0.0223011	0.0771445	0.0001	0.00281137	0.0001	0.0731404	0.0001	0.0001	0.183004
Qinghai	2012	0.030704	0.0435201	0.0219434	0.0258198	0.00939977	0.993409	0.995186	1.0001	0.963506	0.00278615	0.352576	0.0340964	0.278155	0.00676553	0.0178609	0.098895	0.000786279	0.00366995	0.000293633	0.0826416	0.097306	0.0895759	0.253064
Qinghai	2013	0.0308068	0.0442096	0.0120092	0.0239788	0.00948907	0.992706	0.994014	0.996453	0.959646	0.00656148	0.369533	0.0565195	0.432331	0.0103687	0.0194467	0.11757	0.00284512	0.00270184	0.000313813	0.0939242	0.185687	0.211755	0.462986
Qinghai	2014	0.0306705	0.0440269	0.0113342	0.0262655	0.00979524	0.992791	0.994691	0.994621	0.959978	0.00795889	0.353807	0.0777214	0.44439	0.0119048	0.0191295	0.139898	0.0047667	0.00230066	0.000543024	0.110551	0.295593	0.201793	0.487298
Qinghai	2015	0.0309787	0.0435201	0.0135571	0.0272437	0.00969318	0.992243	0.994264	0.993565	0.947973	0.00729015	0.325625	0.0945307	0.40454	0.0185693	0.0127863	0.150469	0.00989091	0.00274425	0.00101639	0.127772	0.339396	0.257554	0.877035
Qinghai	2016	0.0311717	0.0435521	0.0143794	0.0275974	0.00979524	0.994168	0.994368	0.991756	0.968289	0.008878	0.323862	0.113413	0.392431	0.0257716	0.0162751	0.171023	0.00554448	0.00220909	0.00103134	0.147368	0.378445	0.348369	0.640447
Qinghai	2017	0.0307765	0.0433831	0.0150328	0.0278833	0.00950183	0.994295	0.994759	0.99025	0.935684	0.0109347	0.342551	0.134027	0.375187	0.0311076	0.0124692	0.171589	0.0165707	0.00260736	0.00126818	0.163995	0.460117	0.484951	0.626207
Qinghai	2018	0.030904	0.0412598	0.0161723	0.0286179	0.00957837	0.994786	0.995314	0.776005	0.987894	0.0143357	0.353124	0.158078	0.358354	0.0489048	0.0169094	0.197142	0.0184008	0.00538475	0.00133604	0.17409	0.537638	0.453637	0.732768
Qinghai	2019	0.030904	0.0412598	0.0161723	0.0286179	0.00957837	0.994786	0.995314	0.776005	0.987894	0.0143357	0.353124	0.158078	0.358354	0.0780254	0.0169094	0.197142	0.0265446	0.000131428	0.00133604	0.185373	0.583287	0.48823	0.770598
Qinghai	2020	0.0318351	0.0233877	0.0169709	0.0300752	0.0101269	0.99882	0.998678	0.993562	0.990001	0.0225601	0.421171	0.20843	0.358912	0.0910668	0.0346703	0.205931	0.0386689	0.000366825	0.00180856	0.203782	0.624541	0.511886	0.792745
Qinghai	2021	0.0326531	0.0224744	0.0169636	0.030219	0.0103438	0.999613	0.999679	0.994261	0.989528	0.024302	0.398708	0.241025	0.370369	0.0970759	0.0286442	0.184781	0.024623	0.0056233	0.00528523	0.214471	0.696549	0.582649	0.832139
Qinghai	2022	0.0328058	0.0238443	0.0173952	0.0309695	0.0101142	0.999861	1.0001	0.994768	0.978186	0.0273655	0.398423	0.263036	0.365714	0.106098	0.012152	0.202496	0.0286035	0.00282855	0.00532246	0.214471	0.729495	0.503752	0.876618
Qinghai	2023	0.0336345	0.0229311	0.0174084	0.0320671	0.0112495	1.0001	1.0001	0.991577	0.990473	0.0281285	0.38512	0.292944	0.376854	0.126972	0.0254727	0.000110624	0.00943339	0.00486189	0.00674167	0.212095	0.765523	0.586468	0.875505
Ningxia	2011	0.0771153	0.0657621	0.0565918	0.0509905	0.0422233	0.952737	0.989771	0.968463	0.897255	0.0101692	0.330074	0.0428021	0.365461	0.00464616	0.0314987	0.0826252	0.00215884	0.00223178	0.00405542	0.0001	0.0653417	0.0326439	0.0754862
Ningxia	2012	0.0758529	0.0619721	0.0587022	0.0523896	0.0442644	0.951051	0.989478	0.968342	0.938549	0.0126461	0.320714	0.0646311	0.342881	0.0132818	0.0356217	0.102936	0.00449219	0.00384824	0.004425	0.0001	0.161149	0.165955	0.229966
Ningxia	2013	0.0773954	0.0582279	0.0598079	0.0534982	0.0440602	0.949646	0.989728	0.96405	0.928841	0.016292	0.325887	0.0858918	0.344988	0.0223573	0.0410134	0.109987	0.00915888	0.00498917	0.00496778	0.00128765	0.243589	0.242711	0.457659
Ningxia	2014	0.0766403	0.0523831	0.0598616	0.0543309	0.0446343	0.95073	0.990418	0.968345	0.896403	0.0175498	0.296334	0.106843	0.340031	0.0285504	0.0489424	0.115625	0.00806084	0.0001	0.00482826	0.00188147	0.355733	0.213461	0.519941
Ningxia	2015	0.0773943	0.0482735	0.0610303	0.0557065	0.0439582	0.95014	0.990375	0.967193	0.948376	0.0206024	0.30717	0.12515	0.337007	0.0304918	0.0594086	0.12241	0.00929614	0.00272622	0.00494286	0.00188147	0.405606	0.25432	0.921866
Ningxia	2016	0.0780912	0.0446662	0.0623523	0.0367972	0.0437158	0.949252	0.990412	0.968804	0.907744	0.0214628	0.286319	0.144084	0.332772	0.0371583	0.052114	0.148173	0.0188583	0.00249841	0.00512723	0.00188147	0.439114	0.343119	0.608506
Ningxia	2017	0.0687186	0.0395064	0.0617848	0.0386706	0.0436393	0.949141	0.990699	0.968964	0.958889	0.0233986	0.27294	0.166979	0.280635	0.051036	0.0416477	0.163695	0.0317146	0.00920086	0.00536038	0.00188147	0.517677	0.487163	0.634341
Ningxia	2018	0.0708178	0.0358534	0.0636247	0.0399151	0.0465096	0.952548	0.992372	0.969321	0.965116	0.0281427	0.283546	0.192031	0.282685	0.0670114	0.0429164	0.161247	0.0420088	0.00747398	0.00557185	0.00188147	0.586203	0.433717	0.740665
Ningxia	2019	0.0700548	0.0323374	0.0659005	0.0406899	0.0440347	0.952459	0.9925	0.967327	0.993293	0.0288802	0.280263	0.221758	0.266121	0.0799994	0.122206	0.160582	0.0515709	0.0116722	0.00610167	0.00188147	0.639567	0.466009	0.756028
Ningxia	2020	0.0714525	0.0288671	0.0680852	0.04159	0.044966	0.952996	0.992933	0.964813	0.958747	0.0384912	0.324757	0.248392	0.262778	0.0807141	0.134892	0.186546	0.0678129	0.00937706	0.00646651	0.00188147	0.685646	0.508028	0.754253
Ningxia	2021	0.0715631	0.0279539	0.0680805	0.0423242	0.0434224	0.953839	0.99275	0.959803	0.911154	0.0431032	0.303103	0.285778	0.263411	0.0866867	0.15519	0.178397	0.0702835	0.0166276	0.0183143	0.00188147	0.760608	0.592498	0.798756
Ningxia	2022	0.0724556	0.03389	0.0693186	0.0430487	0.0443664	0.954654	0.993995	0.950096	0.98394	0.050104	0.302258	0.314032	0.262127	0.110895	0.0866842	0.18024	0.0783816	0.018827	0.0146874	0.00188147	0.8236	0.538796	0.851028
Ningxia	2023	0.0730871	0.0293237	0.0698442	0.0437838	0.0447491	0.954931	0.993995	0.927761	0.961451	0.0533377	0.302892	0.348692	0.262954	0.134694	0.0686062	0.000110856	0.0266819	0.0218345	0.0238826	0.00188147	0.857216	0.602747	0.83821
Xinjiang	2011	0.321803	0.265383	0.579106	0.128519	0.15266	0.748339	0.888142	0.433255	0.839576	0.140297	0.656832	0.0407872	0.0944753	0.148615	0.222111	0.219018	0.0216949	0.00284096	0.0337732	0.0333542	0.0236912	0.033517	0.066878
Xinjiang	2012	0.331032	0.2682	0.601268	0.14151	0.189999	0.735662	0.885041	0.418006	0.733617	0.166334	0.670845	0.0672144	0.092246	0.188128	0.388936	0.268899	0.0270936	0.0125148	0.0358454	0.0375109	0.126924	0.155636	0.30092
Xinjiang	2013	0.336839	0.25663	0.714884	0.156362	0.172088	0.720876	0.876269	0.357668	0.86645	0.187731	0.66289	0.0922984	0.0564811	0.257935	0.347388	0.2851	0.0400414	0.0215559	0.0398875	0.0386986	0.214229	0.27718	0.573061
Xinjiang	2014	0.356909	0.253114	0.724393	0.169629	0.176872	0.673432	0.820388	0.178168	0.562473	0.204406	0.632135	0.11495	0.0663074	0.312594	0.258584	0.351203	0.0415055	0.00740462	0.0461658	0.0410739	0.321508	0.25432	0.531362
Xinjiang	2015	0.372657	0.251036	0.741728	0.180758	0.238207	0.657814	0.848475	0.159086	0.772875	0.209317	0.637082	0.133065	0.0707746	0.344498	0.154556	0.44542	0.0603095	0.0133186	0.0499279	0.0434492	0.366129	0.281565	0.877589
Xinjiang	2016	0.379904	0.253009	0.747419	0.185496	0.194451	0.654839	0.837743	0.167711	0.808866	0.222753	0.651298	0.152649	0.0734643	0.355272	0.171048	0.527579	0.0680416	0.0130153	0.0519658	0.0446368	0.405549	0.363938	0.630221
Xinjiang	2017	0.381182	0.240566	0.742858	0.192035	0.185828	0.654094	0.837291	0.210953	0.932109	0.251767	0.542244	0.17492	0.0756619	0.39266	0.274442	0.450679	0.0667606	0.0163522	0.0534471	0.0452306	0.48841	0.480994	0.652073
Xinjiang	2018	0.393138	0.237369	0.732302	0.199045	0.188315	0.648121	0.861331	0.156093	0.823546	0.277065	0.527201	0.198925	0.0864535	0.477526	0.41304	0.55423	0.0544075	0.0142832	0.0576387	0.0458245	0.571349	0.448922	0.745418
Xinjiang	2019	0.399783	0.214328	0.744024	0.203358	0.191237	0.644224	0.866117	0.178946	0.864603	0.294369	0.49763	0.228559	0.0867002	0.658673	0.443804	0.719142	0.0667148	0.0112625	0.0602698	0.0458245	0.627598	0.495301	0.764447
Xinjiang	2020	0.407013	0.201013	0.733819	0.213952	0.198419	0.657626	0.872985	0.188528	0.849118	0.332167	0.54606	0.252698	0.0945727	0.775921	0.354366	0.829836	0.11997	0.0150484	0.0616051	0.0458245	0.663619	0.530117	0.761425
Xinjiang	2021	0.414073	0.19873	0.733826	0.218962	0.21786	0.668223	0.881745	0.182769	0.836332	0.399439	0.560757	0.291944	0.098956	0.693713	0.401622	0.62508	0.111963	0.0131206	0.132568	0.0452306	0.740476	0.608178	0.793623
Xinjiang	2022	0.42102	0.210602	0.985543	0.224957	0.227772	0.664013	0.884113	0.126862	0.944019	0.425934	0.537738	0.317122	0.0366787	0.738045	0.283957	0.699043	0.11448	0.0144005	0.107054	0.0452306	0.780366	0.519875	0.847152
Xinjiang	2023	0.443806	0.194621	1.0001	0.232929	0.26677	0.658424	0.890218	0.0183739	0.9024	0.440507	0.545212	0.353239	0.0442858	0.794406	0.283322	0.000187554	0.0580219	0.0362438	0.154084	0.044043	0.817323	0.57991	0.84582
Pij
Beijing	2011	0.00010132	0.000136413	0.000122104	0.000130979	0.000112877	0.00340195	0.00364647	0.00330957	0.00303571	9.25306e-05	0.000174011	0.00234794	0.000894731	0.000521974	0.000224588	0.000905086	0.00181146	9.59918e-05	0.000383713	0.000902628	0.00102707	0.000700766	0.000204729
Beijing	2012	9.19829e-05	0.000130246	0.000119934	0.000112688	0.000103248	0.00340277	0.00364777	0.00331736	0.00302471	0.000115101	0.000174445	0.00275043	0.000777503	0.000625969	0.000266492	0.00107577	0.00202187	0.000754507	0.000401371	0.000946152	0.0016504	0.0016333	0.000906415
Beijing	2013	7.30586e-05	0.000126967	5.38515e-05	8.735e-05	8.19449e-05	0.00340708	0.00364811	0.00331945	0.00305698	0.000133163	0.000168226	0.00318094	0.00109046	0.000683744	6.74488e-05	0.00143752	0.00257513	0.00535429	0.000412623	0.000946152	0.0020618	0.00257535	0.00181416
Beijing	2014	5.12712e-05	0.000116273	4.18398e-05	7.82715e-05	4.31894e-05	0.00341261	0.00365402	0.00333519	0.00303775	0.000131975	0.000148592	0.00361897	0.000788885	0.000548427	0.000112845	0.00165985	0.00268328	0.00304659	0.000431379	0.000971023	0.00259952	0.00228005	0.00186033
Beijing	2015	4.07542e-05	0.000108787	3.48582e-05	7.0901e-05	4.16247e-05	0.00341799	0.00366374	0.00334062	0.00307206	9.60639e-05	0.000111438	0.0040409	0.000640421	0.00070407	5.69728e-05	0.00205146	0.00312102	0.00684009	0.000441635	0.000989677	0.00286236	0.00243278	0.00303901
Beijing	2016	3.02406e-05	0.000106292	2.4095e-05	3.9324e-05	2.98296e-05	0.00342223	0.00366699	0.00334642	0.0030513	7.51578e-05	8.31628e-05	0.00447261	0.000518371	0.00073721	5.69728e-05	0.00214209	0.0034337	0.00579197	0.000469722	0.000995895	0.00304775	0.00274902	0.00263389
Beijing	2017	1.59397e-05	0.000102015	8.34884e-06	3.10198e-05	1.57476e-05	0.00342758	0.0036739	0.0033561	0.00307169	5.4548e-05	6.24785e-05	0.00495147	0.00033402	0.000786303	8.49087e-05	0.00250321	0.00386924	0.00853891	0.000532529	0.000995895	0.00337504	0.00374903	0.0026022
Beijing	2018	7.87834e-06	9.1321e-05	1.3103e-06	2.50564e-05	7.32249e-06	0.00343366	0.00367734	0.00336401	0.00307315	4.65468e-05	5.20022e-05	0.0055094	0.000191904	0.00096231	3.25289e-05	0.00278176	0.00389573	0.0184324	0.00056606	0.000995895	0.00378052	0.00385111	0.00337162
Beijing	2019	7.15216e-07	8.06272e-05	7.90319e-07	2.29223e-05	9.4348e-07	0.00343909	0.00368453	0.0033699	0.00307475	3.61089e-05	3.28861e-05	0.00611403	7.04727e-07	0.00101135	2.90369e-05	0.0028232	0.00431141	0.00019778	0.000590361	0.000995895	0.00411124	0.00422853	0.00354024
Beijing	2020	5.24323e-06	7.67062e-05	9.20011e-07	2.09319e-05	2.98958e-06	0.00343962	0.00368698	0.00337139	0.00307512	2.34489e-05	2.65127e-05	0.00641093	0.000123637	0.00123747	0.0001757	0.00240174	0.00497355	0.00409333	0.000604935	0.000995895	0.00424385	0.00469659	0.00350099
Beijing	2021	1.44863e-05	2.57327e-05	9.80615e-07	2.17103e-05	1.17758e-05	0.00343849	0.00368278	0.00337559	0.00306565	2.76625e-05	2.05955e-05	0.00719881	0.000376166	0.00163314	0.000168716	0.00240433	0.0044328	0.00330021	0.000582167	0.000989677	0.00462974	0.00500104	0.00348733
Beijing	2022	2.66919e-05	1.86035e-05	4.29565e-06	2.16326e-05	2.0923e-05	0.00343698	0.00369035	0.00337748	0.00306987	2.67353e-05	1.82949e-05	0.00755867	0.000665248	0.00190047	2.90369e-05	0.00223498	0.00376183	0.00939712	0.000524392	0.000983459	0.0048768	0.00469408	0.00366237
Beijing	2023	3.38202e-05	1.5039e-05	1.14045e-05	2.37589e-05	2.38116e-05	0.0034363	0.00369035	0.00337748	0.00306561	1.59436e-05	1.09599e-05	0.00820448	0.000756457	0.00224803	4.30049e-05	8.43894e-07	0.00150099	0.00775778	0.000638708	0.000983459	0.00498795	0.00483798	0.00372335
Tianjin	2011	0.000179067	0.000161187	0.000278062	0.000372872	0.000161021	0.00335085	0.00364965	0.00331715	0.00307067	8.30712e-05	0.000330691	0.00190131	0.000808957	4.73408e-05	0.000287444	0.000443716	0.000592384	0.0010037	0.000438186	3.21361e-05	0.000724586	0.000498623	0.000303838
Tianjin	2012	0.000184233	0.000146928	0.000276898	0.000360924	0.000163187	0.00335056	0.00364938	0.00331896	0.00297927	0.000101182	0.000308399	0.00231099	0.000860426	9.32049e-05	0.000203636	0.000488117	0.000744677	0.00112896	0.000441131	3.83539e-05	0.00116757	0.00138035	0.00108592
Tianjin	2013	0.000181667	0.000129106	0.000242754	0.000350335	0.000176547	0.00335109	0.00365321	0.00331355	0.00307089	0.000126638	0.000301305	0.00274745	0.00101805	0.000184704	0.000123321	0.000594584	0.0010831	0.00172206	0.000603784	3.83539e-05	0.00155351	0.00204079	0.00181498
Tianjin	2014	0.00018426	0.000129106	0.000242754	0.000348931	0.000178112	0.00335627	0.00365314	0.00332034	0.00306907	0.000146972	0.000292078	0.00315941	0.0010432	0.000224607	8.84007e-05	0.000651945	0.0011736	0.00187523	0.000971691	3.83539e-05	0.0020618	0.0018564	0.00203918
Tianjin	2015	0.000179558	0.000118412	0.000242755	0.000344824	0.000188342	0.00336349	0.00365572	0.003339	0.00306696	0.000164795	0.000289782	0.00352332	0.000997586	0.000300407	4.99888e-05	0.000754161	0.0015444	0.00209302	0.000910712	4.45717e-05	0.00225547	0.00201876	0.00319539
Tianjin	2016	0.000184326	0.000111283	0.000240027	0.00028643	0.000207479	0.00336553	0.00366073	0.00332717	0.00305909	0.000183506	0.00028122	0.00391862	0.00105988	0.000346487	0.000109353	0.000778011	0.00202114	0.000971854	0.000816009	4.45717e-05	0.00240071	0.00240545	0.00270947
Tianjin	2017	0.000165689	0.000100589	0.000240027	0.000282376	0.000221802	0.00338175	0.00368235	0.00333516	0.00306696	0.000105645	0.000193769	0.00433476	0.000877782	0.000462572	7.79247e-05	0.000765185	0.0021028	0.00334801	0.000336768	4.45717e-05	0.00274973	0.00324523	0.00257676
Tianjin	2018	0.000160873	8.98951e-05	0.000237651	0.000193816	0.000218672	0.0033869	0.00368605	0.00335505	0.00306608	0.000111489	0.000195768	0.00466001	0.000843415	0.000607283	0.000126813	0.000800639	0.00247066	0.00436895	0.000305305	4.45717e-05	0.00315193	0.00332871	0.00309313
Tianjin	2019	0.000151941	8.2766e-05	0.000237818	0.000202817	0.000235041	0.00339033	0.00368648	0.0033656	0.00306696	0.000128017	0.000303602	0.00509124	0.000754723	0.000624266	0.000238556	0.000780391	0.00245741	0.00141319	0.000326745	4.45717e-05	0.00345816	0.00366106	0.00322392
Tianjin	2020	0.000156124	5.78139e-05	0.000230937	0.000206799	0.000240939	0.00339494	0.00369042	0.00337183	0.00306419	0.000171035	0.000352477	0.00531109	0.000832595	0.000748905	0.000196652	0.000748077	0.00283115	0.00216903	0.000343157	4.45717e-05	0.00363468	0.00392732	0.00327806
Tianjin	2021	0.000164506	5.06848e-05	0.000230912	0.000212416	0.000267057	0.00339315	0.0036962	0.00337597	0.0030722	0.000193771	0.000337127	0.00587251	0.000916682	0.000776629	0.000133797	0.000715194	0.00203511	0.00353202	0.000537443	4.45717e-05	0.00407998	0.00425513	0.00341845
Tianjin	2022	0.000167565	4.71202e-05	0.0002247	0.000211114	0.000274639	0.0033938	0.00369035	0.00337748	0.00307315	0.000202208	0.000402134	0.00613618	0.000983729	0.000804837	4.99888e-05	0.000533118	0.00163489	0.00354077	0.000449053	4.45717e-05	0.00435351	0.00397027	0.00370533
Tianjin	2023	0.000172072	4.35556e-05	0.000242912	0.000209619	0.000274037	0.00339421	0.00369035	0.00338831	0.00305745	0.000195186	0.000383002	0.00659081	0.000924116	0.000919395	0.000200144	6.56284e-07	0.00064977	0.00239125	0.000619305	3.83539e-05	0.00452894	0.00417047	0.00376612
Hebei	2011	0.00408318	0.00522289	0.00543983	0.00778537	0.00378478	0.00188854	0.00185443	0.00211227	0.00206907	0.00323308	0.00318012	0.000722364	0.00154708	0.000941044	0.0056651	0.00176815	0.000448185	0.000698096	0.00513097	0.0035825	0.000177734	0.000400867	0.000405397
Hebei	2012	0.00408699	0.00498406	0.00544766	0.00794069	0.00410975	0.00187376	0.00181307	0.00207808	0.00210862	0.00354087	0.00321797	0.000963163	0.00154578	0.00160909	0.00532638	0.00214243	0.00055707	0.00150832	0.00545179	0.00393691	0.000682586	0.00108494	0.00103249
Hebei	2013	0.00407168	0.00483079	0.00513974	0.00809927	0.00401635	0.00186548	0.00177025	0.00197987	0.00227067	0.00388233	0.00330412	0.00121859	0.00169217	0.00211362	0.00372007	0.00246826	0.000754977	0.00127298	0.00565904	0.00424158	0.0011144	0.00166998	0.00191858
Hebei	2014	0.00405469	0.0046989	0.00520665	0.00823601	0.00401057	0.00184334	0.00177911	0.00195916	0.0020309	0.00399447	0.00314331	0.00146612	0.00164511	0.00225008	0.00290993	0.00281787	0.000912419	0.00111754	0.00579726	0.00458356	0.00159035	0.00133297	0.00197994
Hebei	2015	0.00406727	0.00453493	0.00525968	0.00835742	0.00430184	0.00184391	0.00184713	0.00195845	0.00176644	0.00398345	0.00309467	0.00168048	0.00162618	0.00277344	0.00312992	0.00344055	0.00127512	0.00223381	0.005617	0.00481362	0.00183537	0.00154805	0.00300404
Hebei	2016	0.00405636	0.00415708	0.00527139	0.00554824	0.00451945	0.00186185	0.00188423	0.00195357	0.00202253	0.00405618	0.00291771	0.00189594	0.00161285	0.00288166	0.003095	0.00386687	0.00149878	4.12355e-05	0.005515	0.00493798	0.00203698	0.00203388	0.00256495
Hebei	2017	0.0038989	0.00380062	0.00529203	0.00568382	0.00457506	0.00190928	0.00197643	0.00206552	0.00255363	0.00356392	0.00245654	0.00213441	0.00149695	0.0032482	0.00268644	0.00378056	0.00223817	0.000332261	0.00564782	0.0049815	0.00248106	0.0028529	0.0025029
Hebei	2018	0.00381217	0.00342991	0.00531344	0.00577917	0.00442064	0.00195579	0.00234297	0.00226342	0.00267089	0.00379507	0.00247515	0.00241958	0.00142874	0.00388269	0.00246295	0.00437611	0.00274287	0.00230995	0.00463152	0.00498772	0.00281587	0.0027938	0.00297422
Hebei	2019	0.00378188	0.00327306	0.00530111	0.0058737	0.00446673	0.00202906	0.00243603	0.00233516	0.00284737	0.00404067	0.00268072	0.00275243	0.00141433	0.0046155	0.00156551	0.00472373	0.00373019	0.00131359	0.00459836	0.00499394	0.0030342	0.00310831	0.00310358
Hebei	2020	0.00376155	0.00283462	0.00528641	0.00597618	0.00453498	0.00208506	0.00250527	0.00232941	0.00280636	0.00451252	0.00287009	0.00302373	0.00140764	0.00625766	0.00192868	0.0047743	0.0048963	0.00322979	0.0046744	0.00500016	0.0032459	0.00333381	0.00314064
Hebei	2021	0.0037652	0.00269917	0.00528637	0.00607568	0.00457012	0.00212789	0.00254149	0.00234786	0.00279325	0.00470388	0.00266854	0.00344825	0.0014101	0.00654828	0.00169471	0.00446555	0.00400461	0.00296913	0.00436295	0.00499394	0.00358526	0.00370319	0.00326258
Hebei	2022	0.00377309	0.00285244	0.00484136	0.00619126	0.00461827	0.00215322	0.00257981	0.00235911	0.00297803	0.00515336	0.00278611	0.00374219	0.00164412	0.00811746	0.00115346	0.00421137	0.00380597	0.00487671	0.00431828	0.00499394	0.00382434	0.00336649	0.00354
Hebei	2023	0.00376568	0.00274194	0.00486457	0.00630867	0.00455183	0.00217846	0.00260248	0.00234828	0.00260768	0.00522507	0.0027191	0.00407048	0.0016258	0.0092202	0.00185185	1.04328e-06	0.00152232	0.00920842	0.00546992	0.00500016	0.00401077	0.00359739	0.00352404
Shanxi	2011	0.00174408	0.00174386	0.00146815	0.00215168	0.00140216	0.00291404	0.00309243	0.00300338	0.00233731	0.000677602	0.00150302	0.000483797	0.00291077	0.000303916	0.00168773	0.00116633	0.000239979	6.48188e-06	0.000764347	0.00412966	0.000290306	0.000159365	0.000506876
Shanxi	2012	0.00174912	0.00177238	0.00146718	0.00224944	0.00154226	0.00289606	0.00306006	0.00295644	0.00239849	0.000744593	0.00151866	0.000691861	0.00292465	0.000470974	0.00183439	0.0014955	0.000312078	0.000233187	0.000841525	0.0047701	0.000787209	0.000853175	0.00127434
Shanxi	2013	0.00173704	0.0018401	0.00154443	0.002346	0.00154635	0.00288279	0.00304366	0.00295064	0.00191677	0.000843498	0.00161271	0.000911333	0.00271111	0.000575262	0.00188328	0.00164063	0.00035475	0.000201797	0.000886135	0.00555354	0.00121902	0.00141575	0.00197087
Shanxi	2014	0.0017375	0.00165475	0.00157519	0.00242411	0.00156801	0.0028896	0.00303244	0.00292917	0.00222187	0.000901333	0.00163239	0.00112471	0.00264268	0.000703689	0.00205788	0.00158349	0.000475406	0.00052371	0.000861189	0.00624993	0.00173203	0.00126281	0.00206631
Shanxi	2015	0.00173011	0.00159771	0.00163835	0.00247379	0.00154779	0.00289476	0.0030323	0.00293477	0.00224438	0.000895901	0.00161948	0.00128454	0.00249252	0.000694003	0.00221851	0.00190508	0.000480556	0.000337057	0.000858879	0.00702716	0.00197887	0.00144185	0.00312962
Shanxi	2016	0.00170807	0.00160128	0.00167109	0.00125368	0.00162759	0.00290191	0.00304329	0.00292331	0.00270971	0.000903791	0.00158644	0.00144041	0.00238213	0.000783049	0.00254327	0.00208642	0.000704213	0.000446528	0.000865255	0.00783547	0.00218689	0.0019537	0.00282231
Shanxi	2017	0.00164076	0.00156207	0.00170008	0.000974377	0.00159726	0.00292648	0.00308225	0.00291165	0.00247839	0.000823907	0.00120919	0.00161526	0.00219294	0.000963378	0.00248041	0.00230796	0.00106765	0.000470639	0.000881373	0.00862513	0.00258988	0.00265534	0.00259324
Shanxi	2018	0.0016302	0.00148721	0.00170914	0.00102356	0.00162771	0.00293805	0.00313411	0.00292174	0.00247147	0.000852948	0.00114712	0.00185395	0.00215572	0.00117162	0.00244898	0.00280732	0.00117728	0.000737252	0.000901251	0.0091723	0.00295516	0.0025992	0.00293863
Shanxi	2019	0.00161575	0.00144444	0.00170994	0.00108161	0.00160533	0.00294387	0.00316185	0.00292728	0.00200323	0.000967893	0.00126717	0.00213972	0.00212579	0.0014349	0.00188328	0.00302318	0.00135385	0.000785083	0.00093344	0.00961998	0.00326217	0.00290039	0.00300294
Shanxi	2020	0.00162379	0.00149077	0.00170756	0.00114058	0.00168055	0.00294871	0.00317212	0.00292688	0.00232639	0.00118219	0.00140892	0.00238167	0.00214588	0.00194756	0.00167376	0.00315661	0.00163489	0.000883568	0.000973434	0.0101796	0.00349501	0.0030445	0.00306806
Shanxi	2021	0.00164562	0.00135889	0.00170759	0.00118536	0.00167682	0.00295727	0.00320094	0.00293449	0.00222952	0.0013195	0.00149999	0.00273637	0.00218893	0.0025995	0.00185185	0.00248333	0.00128542	0.000459061	0.00140954	0.0103785	0.0038854	0.00347619	0.00318691
Shanxi	2022	0.00165673	0.00140523	0.00168893	0.00123092	0.00172869	0.00296778	0.00321441	0.00292246	0.00280549	0.00137325	0.00137185	0.00298793	0.0022452	0.00303302	0.00132107	0.00278575	0.00109855	0.00197265	0.00140702	0.0104718	0.00415482	0.00307473	0.00338573
Shanxi	2023	0.00167089	0.00135176	0.00167547	0.00129868	0.0017453	0.00296901	0.00323707	0.00287913	0.00275584	0.00142875	0.00142028	0.00332378	0.0022989	0.00339181	0.00138742	9.14123e-07	0.000468049	0.00275426	0.00175666	0.0102728	0.00431454	0.00344453	0.00337962
Inner Mongolia	2011	0.00330111	0.00234699	0.00359236	0.00233796	0.00283984	0.00261192	0.003181	0.00279614	0.00159325	0.00136834	0.00242801	0.000661607	0.00211794	0.00213552	0.00253628	0.00189165	0.000270143	0.000257277	0.000447448	0.000280848	0.000244224	0.000251987	0.000268132
Inner Mongolia	2012	0.00332183	0.00226714	0.00365642	0.00241983	0.00326387	0.00255333	0.00305748	0.00270326	0.00157569	0.00153797	0.00243479	0.000913069	0.00208269	0.0024158	0.00314389	0.00217725	0.000290743	0.000469901	0.00047383	0.000311937	0.000785383	0.000949006	0.00108053
Inner Mongolia	2013	0.00334872	0.00218444	0.00345342	0.0025337	0.00330383	0.00248847	0.00302557	0.00257772	0.0018143	0.0017113	0.00252568	0.00116825	0.00229245	0.00351356	0.00241756	0.00225328	0.000360635	0.000735354	0.000514532	0.000336808	0.00122944	0.00141319	0.00206647
Inner Mongolia	2014	0.00341678	0.00210174	0.00351902	0.00268701	0.00327976	0.00239041	0.00303593	0.00248469	0.00170854	0.00176694	0.0024454	0.00141408	0.00229845	0.00379135	0.00288199	0.00250006	0.000454806	0.000748534	0.000547424	0.000349244	0.00175674	0.00115692	0.00239648
Inner Mongolia	2015	0.0035164	0.00201227	0.00360995	0.002818	0.00392921	0.00235805	0.00298865	0.00242389	0.00110949	0.00174737	0.00242083	0.00161237	0.00231155	0.00395983	0.00254327	0.00326234	0.00053647	0.000507055	0.000631871	0.000349244	0.00197028	0.00138324	0.0036451
Inner Mongolia	2016	0.0036828	0.00191104	0.00366404	0.00245819	0.00389395	0.00233241	0.00300275	0.00241728	0.000432792	0.00177693	0.0024104	0.00181898	0.00242153	0.0040502	0.00278421	0.00352036	0.000582084	0.000511269	0.000621061	0.000355461	0.0021492	0.00190571	0.00323933
Inner Mongolia	2017	0.00419625	0.00183119	0.00371652	0.00257391	0.00388335	0.00233049	0.00292843	0.00243164	0.000223469	0.00179031	0.00274259	0.00206084	0.00285743	0.00411018	0.00275279	0.0039003	0.000828548	0.000791978	0.000693229	0.000355461	0.00254581	0.00259351	0.00271722
Inner Mongolia	2018	0.00410686	0.0017378	0.00374281	0.00271063	0.00424299	0.0023904	0.00306516	0.00243529	0.0011612	0.00190933	0.00271381	0.00236296	0.00274654	0.00448209	0.00412514	0.004365	0.00091389	0.000601017	0.000754288	0.000355461	0.0028742	0.00241292	0.00279622
Inner Mongolia	2019	0.00413551	0.00162338	0.00374605	0.00286453	0.00436238	0.00241091	0.00311745	0.00243285	0.00201794	0.00204168	0.00289957	0.00273005	0.00277012	0.00501376	0.00367467	0.00422387	0.00122215	0.000524147	0.00080645	0.000355461	0.00311005	0.00271239	0.00290417
Inner Mongolia	2020	0.00413448	0.0015086	0.00374597	0.00300888	0.00437634	0.00246295	0.00320475	0.0024209	0.00135188	0.00224678	0.0031291	0.00304848	0.00276923	0.00556075	0.004401	0.00418938	0.00172023	0.00100914	0.000825463	0.000355461	0.00331361	0.0028765	0.00294031
Inner Mongolia	2021	0.00406892	0.00143374	0.00374594	0.00314767	0.00458842	0.00229727	0.00313073	0.00236713	0.00214139	0.00248427	0.00290572	0.00348741	0.00270787	0.00682438	0.00468036	0.00395401	0.00156205	1.88944e-05	0.00107101	0.000355461	0.00370557	0.00333582	0.00308637
Inner Mongolia	2022	0.00407237	0.00149434	0.00517645	0.00341866	0.00466099	0.00236767	0.00316908	0.00220744	0.00206062	0.00283183	0.00307267	0.00381082	0.00167305	0.00855168	0.00411466	0.0044059	0.00162238	0.000129396	0.000918539	0.000355461	0.00402158	0.00298521	0.00323619
Inner Mongolia	2023	0.00409972	0.00141235	0.00569727	0.00366803	0.00472984	0.00239945	0.00316908	0.00207744	0.00145687	0.00292228	0.00297884	0.00420266	0.00143867	0.00946447	0.00420196	1.06944e-06	0.000813834	0.0010084	0.00160975	0.000355461	0.00421586	0.00339065	0.00322198
Liaoning	2011	0.00190778	0.00242434	0.00179362	0.00175135	0.00241618	0.00276837	0.00245369	0.00190033	0.00274868	0.00235852	0.0022974	0.000926708	0.00253458	0.000700625	0.00234073	0.00159	0.000651977	0.000917715	0.00334886	0.000510906	0.000462385	0.00040568	0.000227116
Liaoning	2012	0.00193828	0.0024058	0.00192748	0.00184775	0.00258408	0.00275742	0.0023973	0.00188185	0.00281772	0.00265562	0.0023133	0.0011871	0.00234944	0.000918925	0.00256073	0.00195605	0.000658598	0.00188194	0.00341453	0.000523342	0.000935549	0.00121553	0.000926351
Liaoning	2013	0.00193743	0.00236695	0.00157479	0.00192752	0.00260888	0.00273388	0.00237504	0.00187086	0.00274846	0.00285467	0.00227364	0.00145989	0.00306899	0.00136694	0.00275628	0.00225301	0.000800591	0.00176626	0.00361172	0.000523342	0.00134008	0.00186988	0.00182854
Liaoning	2014	0.00191643	0.00238156	0.00165494	0.00200209	0.00207725	0.0027349	0.00236917	0.00186936	0.00166987	0.00295766	0.00212446	0.00171544	0.00283746	0.00142756	0.00313341	0.00214354	0.000789555	0.00226863	0.00396549	0.000541995	0.00186448	0.00167041	0.00216517
Liaoning	2015	0.00194265	0.00238691	0.00171111	0.00206558	0.00259804	0.0027323	0.00237867	0.00191556	0.0019966	0.00308816	0.0022148	0.00193005	0.00276786	0.00203948	0.00317532	0.00215425	0.000882255	0.00375863	0.0041936	0.000554431	0.00206513	0.0018364	0.00337057
Liaoning	2016	0.00186943	0.00244394	0.00177497	0.00157567	0.00275331	0.00275182	0.00246051	0.00196615	0.00265275	0.0029046	0.00261116	0.00213435	0.00249751	0.00227262	0.00397498	0.00232159	0.000997026	3.38962e-05	0.00448963	0.000560649	0.00221086	0.00228189	0.00263649
Liaoning	2017	0.0019203	0.00247745	0.00182049	0.00161111	0.00277148	0.00276437	0.00243309	0.00210137	0.00238495	0.00250956	0.00216308	0.00234913	0.00250729	0.00249723	0.00369562	0.0022178	0.0012972	0.000771743	0.00484263	0.000573084	0.00255604	0.00304343	0.00250052
Liaoning	2018	0.00193665	0.00246676	0.00183113	0.0016328	0.00260502	0.00276651	0.00248757	0.0021752	0.00200789	0.00265527	0.00213734	0.00257469	0.00251777	0.00291632	0.00353848	0.00222993	0.00161282	0.000610643	0.00279345	0.000573084	0.00289913	0.00291734	0.0030025
Liaoning	2019	0.00194135	0.00232275	0.00184307	0.00171643	0.002891	0.0027913	0.00257814	0.00222364	0.00284008	0.00286751	0.00233136	0.00293476	0.00250428	0.00356295	0.00496671	0.00242705	0.00219403	0.00176526	0.00159934	0.000573084	0.00312074	0.00316382	0.00310674
Liaoning	2020	0.00197457	0.00217874	0.00184714	0.00180552	0.00278123	0.00280263	0.0027221	0.00221415	0.00211371	0.003016	0.00242794	0.00326758	0.00255774	0.00455112	0.00544511	0.00243795	0.00344621	0.00144566	0.00166941	0.000560649	0.0032783	0.00343759	0.00309501
Liaoning	2021	0.00199392	0.00206824	0.0018471	0.00186726	0.00302183	0.00281492	0.00275238	0.00221412	0.00289522	0.00325515	0.00238102	0.00370559	0.00259333	0.00467751	0.00610859	0.00197741	0.00285985	0.00210088	0.00151566	0.000548213	0.00363264	0.00382027	0.00322076
Liaoning	2022	0.00199294	0.00218943	0.00194907	0.00194715	0.00295659	0.00283683	0.00278379	0.00222911	0.0024958	0.00342996	0.002392	0.00387704	0.00240862	0.00644437	0.00572447	0.00223763	0.002453	0.00199996	0.0011658	0.000541995	0.00389926	0.00349094	0.00340885
Liaoning	2023	0.00200919	0.00202903	0.00195461	0.00207316	0.00305156	0.00284167	0.00280645	0.00221828	0.00283742	0.00349008	0.00234027	0.00426764	0.00242748	0.00760519	0.0053613	8.32031e-07	0.000938905	0.00286828	0.00173541	0.000541995	0.00407172	0.00369701	0.00341003
Jilin	2011	0.00241386	0.00225317	0.00205924	0.0017173	0.00378286	0.00252347	0.00270231	0.00283505	0.00262763	0.00141728	0.00324408	0.000833216	0.00292776	0.000992158	0.00433466	0.00123451	0.000315757	0.000365177	0.000356977	0.00478875	0.000234557	0.000185355	0.000166082
Jilin	2012	0.00245748	0.00217154	0.00211299	0.00186882	0.0041189	0.00246762	0.0025744	0.00283904	0.00261568	0.00157447	0.00317329	0.00110774	0.0029009	0.0010972	0.00598287	0.00140701	0.00033415	0.000454002	0.000390333	0.00526752	0.00072523	0.000931786	0.00103322
Jilin	2013	0.00250351	0.00209351	0.00169878	0.00200195	0.00424022	0.00241889	0.00257956	0.00281971	0.00262267	0.00169128	0.00310275	0.00136565	0.00390682	0.00115266	0.00651715	0.0015372	0.000422435	0.000209772	0.000409852	0.00576494	0.00112718	0.00151062	0.00177658
Jilin	2014	0.00259857	0.00202022	0.00184217	0.00214545	0.00421831	0.00237108	0.00238678	0.0028265	0.00257453	0.0017553	0.00295864	0.00161342	0.00371501	0.00114537	0.00616096	0.00149092	0.000418756	0.000939525	0.000414656	0.00631211	0.00164342	0.00138292	0.0020199
Jilin	2015	0.00262857	0.00195025	0.00203906	0.00232266	0.00474946	0.00234889	0.00232405	0.00281235	0.00246026	0.00183679	0.00304319	0.00174884	0.00332475	0.00138244	0.00320325	0.00197339	0.000517342	0.00121438	0.000422509	0.00667896	0.00186448	0.0015826	0.00331673
Jilin	2016	0.00262726	0.00187661	0.00208911	0.00228677	0.00496201	0.00233743	0.00240931	0.00280801	0.00253163	0.00172888	0.002713	0.00194643	0.00322195	0.00185931	0.00343722	0.00265845	0.000621077	0.000423703	0.000436645	0.00707068	0.00204117	0.00211157	0.00258236
Jilin	2017	0.00281992	0.00180638	0.00216291	0.00242294	0.00496598	0.00234994	0.00245983	0.00279515	0.00236055	0.00127119	0.00194564	0.00215164	0.00338654	0.00216778	0.0035734	0.00267905	0.000744677	0.000594343	0.000453569	0.00743131	0.00242256	0.00285475	0.00247718
Jilin	2018	0.00281743	0.00174236	0.00216291	0.00256059	0.00433855	0.00236315	0.00258002	0.00284429	0.00211539	0.00135437	0.00204676	0.00234947	0.0033826	0.0025475	0.00402736	0.00259593	0.000916833	0.000709093	0.000471051	0.00759919	0.00273514	0.00265798	0.00303071
Jilin	2019	0.00283442	0.00167474	0.00218285	0.0027031	0.00463367	0.00236915	0.00263289	0.00287772	0.00268604	0.00153339	0.00294132	0.00264405	0.00337029	0.00287189	0.00323468	0.00272531	0.000980104	0.000936742	0.00047126	0.0077422	0.0029414	0.00287941	0.00304015
Jilin	2020	0.00285038	0.00161194	0.00217792	0.00288771	0.00454376	0.00237769	0.00267206	0.00289685	0.00218873	0.00190287	0.00338807	0.00292453	0.003405	0.00339808	0.00351404	0.00279006	0.00144728	0.000555394	0.000486811	0.00777951	0.00310287	0.00311153	0.00308645
Jilin	2021	0.00286733	0.00154781	0.00217787	0.00307921	0.00482781	0.00238881	0.00271265	0.00293708	0.00289813	0.00190033	0.00314931	0.00331503	0.00343174	0.00469297	0.00461401	0.00223271	0.00141712	0.000656163	0.000632289	0.00777951	0.00347454	0.00350288	0.00316743
Jilin	2022	0.0028858	0.00163692	0.00217918	0.00323757	0.00487788	0.00239004	0.00273846	0.00295496	0.002936	0.00207048	0.00347237	0.00343723	0.00345819	0.00600742	0.00373753	0.00248941	0.00125967	0.00110567	0.000507277	0.00777329	0.00371353	0.00314445	0.00327745
Jilin	2023	0.00291688	0.00153711	0.00223108	0.00338233	0.0050051	0.00239125	0.00278379	0.00295496	0.00288664	0.00200819	0.00326285	0.00376893	0.00340491	0.00687275	0.00376546	8.93512e-07	0.000515135	0.000981347	0.000768058	0.00776708	0.0038761	0.0034514	0.00324957
Heilongjiang	2011	0.0057045	0.00234524	0.00511989	0.0030402	0.00667098	0.00236247	0.00196884	0.00263441	0.00195727	0.00207436	0.00363613	0.000770722	0.00283187	0.00205983	0.00725046	0.00171929	0.00073732	0.000457343	0.000502347	0.000535778	0.000206307	0.000316267	0.000509
Heilongjiang	2012	0.00571111	0.0023082	0.00565785	0.00338564	0.00790827	0.00230511	0.00191097	0.00253689	0.00130716	0.00257932	0.00415863	0.00101499	0.00246688	0.00279114	0.00738316	0.00207857	0.000907269	0.000952805	0.000558575	0.000548213	0.000693543	0.0010027	0.00104875
Heilongjiang	2013	0.0056941	0.00239974	0.00634345	0.00361059	0.00719274	0.00228244	0.00183154	0.00252836	0.00108523	0.00305112	0.00469731	0.00126348	0.00207536	0.00357555	0.00551844	0.00222969	0.00105515	1.73757e-05	0.00058281	0.000597956	0.00110183	0.00156014	0.00192365
Heilongjiang	2014	0.00570591	0.00249313	0.0062987	0.00384305	0.00747931	0.00224867	0.00175527	0.00253869	0.00248662	0.00323233	0.00468426	0.00153235	0.00210441	0.00328654	0.00553939	0.00235509	0.00118758	0.000102656	0.000606925	0.000604173	0.00161731	0.00145212	0.00209882
Heilongjiang	2015	0.00573792	0.00240402	0.00657219	0.00406072	0.00913256	0.0022323	0.00185572	0.00255307	0.00222056	0.00333636	0.0047104	0.00169157	0.00198936	0.00365416	0.00602478	0.00329083	0.00155837	0.000747303	0.000634827	0.000610391	0.00185578	0.00168292	0.00328609
Heilongjiang	2016	0.00580021	0.00229708	0.00705933	0.00420645	0.0088922	0.0022447	0.00186648	0.00255872	3.07601e-07	0.00344224	0.0046823	0.00187424	0.00180877	0.00402209	0.00592002	0.0038716	0.00156867	0.000359426	0.000680007	0.000610391	0.00203367	0.00213729	0.00280605
Heilongjiang	2017	0.00690063	0.0021823	0.00717839	0.00434269	0.00888522	0.00225221	0.00184962	0.00258911	0.00194729	0.00371168	0.00503436	0.00208081	0.00230733	0.0044821	0.00582224	0.00393625	0.00195124	0.000756376	0.000701227	0.000635262	0.00240699	0.00287867	0.00258383
Heilongjiang	2018	0.00685632	0.00209034	0.00728578	0.00454831	0.00900137	0.00227914	0.00205442	0.00261445	5.03441e-05	0.00373777	0.00495118	0.00236323	0.00223573	0.00501929	0.00610859	0.00402948	0.00190784	0.000541864	0.000729291	0.000622827	0.0027306	0.0026543	0.00298019
Heilongjiang	2019	0.0069018	0.00195845	0.00735611	0.00475663	0.0089968	0.00238752	0.00227913	0.00267512	0.00049776	0.00394956	0.00632598	0.00265549	0.00222607	0.00547574	0.00477115	0.0042589	0.00268843	0.000818055	0.000755463	0.000622827	0.00294184	0.00286563	0.00306294
Heilongjiang	2020	0.00696763	0.00184723	0.00734885	0.0050724	0.00904229	0.00238292	0.00235886	0.00268953	0.000761198	0.00430163	0.00679575	0.00294967	0.00226129	0.00648226	0.00624477	0.00441601	0.00361469	0.00192932	0.000793211	0.000622827	0.00309963	0.00306942	0.003044
Heilongjiang	2021	0.00704044	0.00176881	0.00734885	0.00517643	0.00943574	0.00231147	0.00244179	0.00279236	0.0024706	0.00431678	0.00629747	0.00337643	0.00229663	0.00729732	0.00853202	0.00419608	0.00296211	1.86914e-05	0.00104654	0.000616609	0.00349831	0.00351329	0.00317959
Heilongjiang	2022	0.00710831	0.00177594	0.00732617	0.00531211	0.00930985	0.00231371	0.00248916	0.00282496	0.00300563	0.00449572	0.00614125	0.00354706	0.00234013	0.00871857	0.00665333	0.00452736	0.00244785	0.000423508	0.000761348	0.000616609	0.00373553	0.00319403	0.00334968
Heilongjiang	2023	0.00715287	0.00161197	0.00742993	0.00550088	0.00934006	0.00231325	0.00248916	0.00284663	0.0027779	0.00433931	0.00599069	0.00383936	0.00231376	0.0101918	0.00478163	1.11988e-06	0.00090874	0.000338024	0.0010748	0.000610391	0.00390091	0.00348116	0.00327432
Shanghai	2011	0.000147409	6.23766e-05	0.000110322	9.89508e-06	0.000113118	0.00341101	0.00359301	0.00323134	0.00305887	5.88857e-05	0.000122806	0.00284268	0.00168555	0.000697028	1.10102e-06	0.000780522	0.00110812	0.00218508	0.00185165	2.59183e-05	0.00104125	0.000850608	3.83457e-07
Shanghai	2012	0.00014143	9.23903e-05	0.000109607	1.52465e-05	0.000129968	0.00341576	0.00360384	0.00324422	0.00306587	6.3838e-05	0.000117995	0.00326799	0.00160392	0.000556321	1.1577e-05	0.00105296	0.00129425	0.00187695	0.00189506	2.59183e-05	0.00158369	0.00179694	0.000853062
Shanghai	2013	0.000136447	9.4743e-05	9.15108e-05	1.55805e-05	0.00010373	0.00341676	0.00362193	0.00324275	0.00305618	6.50558e-05	0.000106883	0.00370346	0.00174544	0.000624164	1.1577e-05	0.000904632	0.00142742	0.00301102	0.00804286	2.59183e-05	0.00199144	0.00293289	0.00182013
Shanghai	2014	0.000126892	8.92179e-05	9.15108e-05	1.90646e-05	0.000101684	0.00341981	0.00362993	0.00324436	0.00306776	6.41809e-05	8.90638e-05	0.00419538	0.00158994	0.000780583	1.10102e-06	0.000977492	0.00153998	0.00280844	0.0081469	2.59183e-05	0.0025254	0.00252486	0.00191474
Shanghai	2015	0.000119009	9.34954e-05	9.65046e-05	2.00134e-05	0.00011721	0.00342095	0.00363562	0.00325798	0.00306761	5.0602e-05	6.44654e-05	0.00469472	0.00140469	0.00100055	1.5069e-05	0.00129148	0.00168859	0.00405016	0.00845688	2.59183e-05	0.00276129	0.00270701	0.00299865
Shanghai	2016	9.7615e-05	9.14992e-05	9.84439e-05	2.25183e-05	0.000100841	0.00342462	0.003647	0.00326847	0.00307431	3.84516e-05	5.11909e-05	0.00526887	0.00104557	0.000790663	1.10102e-06	0.00158135	0.00199612	0.00443596	0.00904847	2.59183e-05	0.00292526	0.00293872	0.00247087
Shanghai	2017	9.3032e-05	8.07698e-05	9.95893e-05	2.21616e-05	8.63982e-05	0.0034259	0.00365583	0.00328361	0.00306776	4.36672e-05	4.38628e-05	0.0058404	0.000962769	0.000844739	1.5069e-05	0.00220477	0.00221536	0.00543781	0.00932543	3.21361e-05	0.00326515	0.00416414	0.00263727
Shanghai	2018	9.17727e-05	7.50308e-05	9.95893e-05	1.00645e-06	9.10922e-05	0.00342845	0.00366368	0.00329318	0.00307125	4.15661e-05	3.23271e-05	0.0064727	0.000942992	0.000914756	1.1577e-05	0.00226919	0.00266341	0.00259992	0.0096971	3.21361e-05	0.00369959	0.00421064	0.00353562
Shanghai	2019	8.19609e-05	7.49239e-05	9.95893e-05	4.09439e-06	8.17042e-05	0.0034325	0.00367288	0.00331017	0.00307024	3.82832e-05	1.94677e-05	0.00717215	0.0007889	0.00107525	4.59301e-06	0.00252618	0.00308277	0.0108816	0.0101462	3.21361e-05	0.00404244	0.00463326	0.0037151
Shanghai	2020	7.90306e-05	7.49595e-05	6.8428e-05	7.19411e-06	7.6288e-05	0.0034356	0.00367576	0.00331395	0.00307293	3.4805e-05	1.82022e-05	0.00759772	0.00103629	0.00102105	8.085e-06	0.00228814	0.00434746	0.0147563	0.0100087	3.21361e-05	0.00422454	0.00515489	0.00361585
Shanghai	2021	8.33484e-05	1.86035e-05	6.83722e-05	7.66471e-06	7.94174e-05	0.00343705	0.00368165	0.00332643	0.00305836	2.72583e-05	8.31735e-06	0.00849282	0.00111529	0.00134106	1.10102e-06	0.00220109	0.00421724	0.00583529	6.88176e-05	3.83539e-05	0.00463508	0.00539031	0.00361
Shanghai	2022	8.56165e-05	4.34522e-06	6.30572e-05	5.72977e-06	8.13431e-05	0.00343723	0.00369035	0.00332331	0.00307351	3.04457e-05	4.44977e-06	0.00879257	0.00121918	0.00164971	4.59301e-06	0.00187687	0.00320122	0.0100761	2.05314e-05	3.83539e-05	0.00487664	0.0049104	0.0037555
Shanghai	2023	8.75085e-05	7.80643e-07	6.42511e-05	9.66302e-06	8.89257e-05	0.0034378	0.00369035	0.00332331	0.00307632	2.77222e-05	7.07687e-07	0.00960067	0.00123987	0.00191956	1.8561e-05	7.877e-07	0.00145537	0.0129885	7.88089e-05	3.83539e-05	0.0049908	0.00511998	0.00383496
Jiangsu	2011	0.00356122	0.00346766	0.004496	0.00304648	0.00394751	0.00183559	0.00177524	0.00230018	0.00232486	0.00346974	0.00164843	0.00160447	0.00168571	0.00110533	0.00244898	0.00298497	0.00272963	0.00695324	0.0148102	0.00483849	0.000695906	0.000775527	6.681e-05
Jiangsu	2012	0.00355572	0.00334749	0.00463151	0.00312886	0.00409651	0.00186591	0.00183927	0.00223399	0.00256856	0.00386562	0.00167102	0.00194893	0.00160111	0.00148571	0.00252581	0.00364139	0.00378758	0.00453234	0.0156378	0.00531726	0.00112546	0.0016026	0.000836721
Jiangsu	2013	0.0035708	0.00324323	0.00445642	0.00327382	0.00408616	0.00188587	0.00189633	0.00218744	0.0027218	0.00410757	0.00161058	0.00229314	0.00171767	0.00197341	0.00200899	0.004193	0.00500518	0.00572728	0.0166121	0.00575251	0.00153353	0.00231427	0.0017711
Jiangsu	2014	0.00356844	0.00310328	0.00458401	0.00345931	0.00416752	0.00190147	0.00193319	0.00215494	0.002673	0.00430527	0.00146914	0.00264961	0.00163852	0.00203291	0.00243851	0.00434253	0.00542822	0.0097674	0.0169176	0.00615667	0.00205449	0.00207897	0.00194857
Jiangsu	2015	0.00359966	0.00294402	0.00465912	0.00359253	0.00429282	0.001919	0.00196562	0.00222648	0.00262828	0.00471225	0.00149677	0.00297156	0.00161861	0.00207426	0.00241057	0.00487019	0.00591746	0.00890843	0.0169293	0.00658569	0.00229897	0.00226646	0.00306646
Jiangsu	2016	0.00356764	0.00283405	0.00478223	0.00365406	0.00422987	0.00195518	0.00200904	0.00221892	0.00285727	0.00485381	0.00138311	0.00330609	0.00152582	0.00212794	0.00246994	0.00475924	0.00722041	0.00777054	0.0172349	0.0070085	0.00248457	0.00263499	0.0025759
Jiangsu	2017	0.00351099	0.00267386	0.00487654	0.00371848	0.00431219	0.00199718	0.00207742	0.00220652	0.00301051	0.00480263	0.0012309	0.00369107	0.00143453	0.00220613	0.00264453	0.00443382	0.00823054	0.0144351	0.0174079	0.00735048	0.00290461	0.00344627	0.00259137
Jiangsu	2018	0.00349399	0.00255986	0.00493466	0.00373844	0.00437177	0.0020524	0.00215826	0.00219592	0.0027998	0.00482429	0.00116598	0.00410944	0.0013928	0.0023754	0.00256073	0.00481261	0.00993739	0.000353678	0.017825	0.00761785	0.00333028	0.00349071	0.00327709
Jiangsu	2019	0.00345752	0.0024463	0.00496571	0.00380997	0.00442702	0.00208263	0.00220821	0.00221662	0.00291328	0.00503956	0.0011221	0.00456334	0.00135139	0.00443995	0.00238962	0.00498496	0.0127169	0.00161966	0.0179725	0.007879	0.00364766	0.00383735	0.00339392
Jiangsu	2020	0.00347433	0.0023364	0.00498909	0.00388731	0.00445458	0.00210907	0.00224658	0.00224237	0.00297752	0.00535095	0.00115061	0.00494105	0.00135193	0.00564643	0.00206836	0.00526923	0.015879	0.0134002	0.018544	0.00797226	0.00386905	0.00415297	0.00338396
Jiangsu	2021	0.00349127	0.00217517	0.00498905	0.00383752	0.00447504	0.00213424	0.00229545	0.00230738	0.00301248	0.00557761	0.00105281	0.00558392	0.00136396	0.00673167	0.00204391	0.00534142	0.0129832	0.00740598	0.0047707	0.0079847	0.00426162	0.00451654	0.00345861
Jiangsu	2022	0.00350058	0.00216092	0.00453699	0.00392545	0.00450272	0.00216048	0.00235317	0.00234828	0.00301903	0.00589222	0.00104676	0.00600444	0.00161373	0.00814554	0.00183789	0.00535183	0.0106577	0.0184677	0.00497206	0.00790387	0.0045421	0.00422746	0.0037126
Jiangsu	2023	0.00352677	0.00213953	0.004543	0.00399842	0.00453714	0.0021755	0.00237584	0.00236995	0.00305498	0.00603197	0.0010256	0.00650079	0.00163053	0.00942101	0.00224645	1.16848e-06	0.00403036	0.016381	0.00560481	0.00783547	0.00471253	0.00443925	0.00371757
Zhejiang	2011	0.00111669	0.00183928	0.00163414	0.00179792	0.000907004	0.00302302	0.00228849	0.00282045	0.00276259	0.00159726	0.00128205	0.00246078	0.00123976	0.000349144	0.00132806	0.00180301	0.00262001	0.00291671	0.00779912	0.000492253	0.000898169	0.000928471	0.00011183
Zhejiang	2012	0.00105157	0.00170818	0.00165137	0.00181929	0.000746445	0.00302263	0.0023107	0.00277852	0.00267293	0.00168301	0.00125835	0.00285979	0.00108413	0.000659096	0.00145377	0.00197143	0.00400314	0.00751175	0.0080012	0.000504689	0.00135973	0.00207181	0.000813271
Zhejiang	2013	0.00104582	0.00157269	0.00157667	0.00179864	0.000849713	0.00302128	0.00232602	0.00275278	0.00211015	0.00180684	0.00123523	0.0032784	0.0011692	0.00080696	0.00238962	0.00247753	0.00420767	9.45217e-05	0.00832494	0.000504689	0.00178359	0.00276765	0.00175329
Zhejiang	2014	0.00102799	0.00144622	0.00159605	0.00176671	0.000877877	0.0030349	0.00240421	0.00274179	0.00292799	0.00181183	0.00115257	0.00374445	0.00110582	0.000955382	0.00144678	0.00253335	0.00509273	0.00173734	0.00832891	0.000504689	0.00231551	0.00242743	0.00182348
Zhejiang	2015	0.00103577	0.00131133	0.00160426	0.00172162	0.000669175	0.00304504	0.00245611	0.0027225	0.00279019	0.00187339	0.00111165	0.00417885	0.00111145	0.00106676	0.0018763	0.00356893	0.0062684	0.0015089	0.00833094	0.000504689	0.00255022	0.00261588	0.00299236
Zhejiang	2016	0.0010282	0.00118294	0.00162142	0.00155156	0.000646066	0.00305979	0.00261422	0.00272421	0.00274445	0.0020207	0.00108029	0.00461062	0.00107373	0.0010696	0.00163186	0.00348844	0.00661124	0.00394753	0.00852063	0.000504689	0.00271255	0.00282267	0.00246034
Zhejiang	2017	0.000890318	0.00106737	0.00161947	0.00150266	0.000664481	0.00306874	0.00268627	0.00271781	0.00299842	0.00198419	0.000964769	0.00512885	0.000790286	0.00118268	0.000521407	0.00336428	0.00797304	0.00344593	0.00898778	0.000510906	0.00309508	0.00384701	0.00257478
Zhejiang	2018	0.000889177	0.000920906	0.00161474	0.00145489	0.000687349	0.00309233	0.00274469	0.00270871	0.00295377	0.00202846	0.000900484	0.00571078	0.000793144	0.00129466	0.00197757	0.00349835	0.00884486	0.00534132	0.00928032	0.000510906	0.00352596	0.003907	0.00337883
Zhejiang	2019	0.000899017	0.000800708	0.00157187	0.001378	0.000678924	0.00311781	0.00286148	0.00273031	0.00281889	0.00216564	0.000863254	0.00634898	0.000862789	0.00154788	0.00125822	0.00359385	0.00814814	0.00534427	0.00945045	0.000504689	0.00387222	0.0042561	0.00352659
Zhejiang	2020	0.000906012	0.000670922	0.00158431	0.00130599	0.000695293	0.0031318	0.00290706	0.00272863	0.00299354	0.00226381	0.000861469	0.00685851	0.000863057	0.00187366	0.00612255	0.00369354	0.00969534	0.00706511	0.00955588	0.000504689	0.00408349	0.00462622	0.00345162
Zhejiang	2021	0.000906055	0.000663792	0.00158432	0.00127599	0.000713587	0.00313833	0.00295234	0.00269835	0.00296805	0.00232082	0.00076531	0.00768108	0.000863142	0.00223856	0.00232676	0.0038402	0.00851232	0.00797489	0.00388597	0.000498471	0.00444718	0.00493972	0.00348945
Zhejiang	2022	0.000911961	0.000653099	0.00135456	0.00127137	0.000713708	0.00314422	0.00298777	0.00270579	0.00300002	0.00244075	0.000761624	0.00825583	0.00118737	0.00263591	0.00612255	0.00401369	0.00752132	0.00986051	0.00528268	0.000498471	0.00472203	0.00446433	0.00373079
Zhejiang	2023	0.000918649	0.000631711	0.00137221	0.00129146	0.000735132	0.0031502	0.00303309	0.00272746	0.00306943	0.00259712	0.000716158	0.0089368	0.00117619	0.00309459	0.000783306	1.03466e-06	0.003341	0.00474279	0.00526942	0.000486035	0.00486852	0.00467474	0.00375752
Anhui	2011	0.00420034	0.0056289	0.00416841	0.00422376	0.00374013	0.00187211	0.00107322	0.00252038	0.00211721	0.00223798	0.00354009	0.00062912	0.00244073	0.00173258	0.00251882	0.00169945	0.00108163	0.00151896	0.00104779	0.000461164	0.000196425	0.000522688	0.000221642
Anhui	2012	0.00417527	0.00538757	0.00421379	0.00441026	0.00423047	0.00185344	0.00108986	0.0024656	0.00223717	0.00242411	0.00340001	0.00088083	0.00238238	0.00220638	0.0027039	0.00207894	0.00184751	0.00254697	0.00115423	0.000467382	0.000689031	0.00140484	0.00093779
Anhui	2013	0.00416401	0.00516835	0.00508702	0.00459054	0.00391356	0.00182981	0.00106644	0.00242539	0.00178764	0.00261877	0.00327796	0.00113477	0.00178503	0.00234664	0.00367118	0.00230924	0.00258175	0.00102508	0.00124286	0.0004736	0.00112353	0.00196956	0.00177233
Anhui	2014	0.00416396	0.00497444	0.00511873	0.00476175	0.00407749	0.00181534	0.00115257	0.0024116	0.00260949	0.00276738	0.00307708	0.00139923	0.00176732	0.0023578	0.00436259	0.0024276	0.00264355	0.00180152	0.00132731	0.000486035	0.00166114	0.00178752	0.00216264
Anhui	2015	0.00416628	0.00490636	0.00520194	0.00492507	0.00487355	0.0018284	0.00121888	0.00239223	0.00237249	0.00288313	0.00299218	0.00162349	0.00172353	0.00245562	0.00491782	0.00278997	0.00279731	0.00260799	0.0014125	0.000504689	0.00182323	0.00195801	0.00305331
Anhui	2016	0.00413955	0.00486109	0.00524693	0.00514254	0.00473465	0.00188501	0.00134	0.00240282	0.00209973	0.00306655	0.00281648	0.00184662	0.00168153	0.00276644	0.00419847	0.00301732	0.00288265	0.00276061	0.00145749	0.000510906	0.00207292	0.00238769	0.00270449
Anhui	2017	0.00406109	0.00478908	0.00532775	0.00472154	0.00480434	0.00192513	0.00148301	0.00239594	0.00278538	0.00302665	0.00255376	0.00210397	0.00158756	0.00305216	0.00415656	0.0032929	0.00373608	0.00204133	0.00154705	0.000510906	0.0025005	0.00323896	0.0025896
Anhui	2018	0.00408197	0.0047545	0.00536914	0.00489685	0.00478942	0.00195867	0.00160125	0.00239348	0.00244787	0.00307846	0.00234463	0.00241094	0.00158082	0.0033213	0.0034442	0.00340369	0.004577	0.00222425	0.0016346	0.000510906	0.00291625	0.00323975	0.00315589
Anhui	2019	0.00408707	0.00473062	0.00542071	0.00497781	0.00484562	0.00202541	0.0017351	0.00232948	0.00237883	0.00341756	0.00208935	0.00276307	0.00155887	0.00341594	0.00272834	0.00355538	0.00492867	0.00403789	0.00171181	0.000517124	0.00321423	0.00358106	0.00325659
Anhui	2020	0.00410401	0.00283462	0.00545464	0.00509093	0.00480374	0.00206477	0.0018479	0.00233421	0.00217489	0.003777	0.0021923	0.00306171	0.00155349	0.00421246	0.00166678	0.00446313	0.0060933	0.00399536	0.00186113	0.000517124	0.00345696	0.0038443	0.00327517
Anhui	2021	0.00413634	0.0027063	0.00545461	0.00518567	0.00488606	0.00208981	0.00201337	0.00234173	0.00286098	0.00400107	0.00208027	0.00349606	0.00157452	0.00551923	0.00388768	0.00455128	0.00582697	0.00333854	0.00255507	0.000517124	0.00389396	0.00420508	0.00339963
Anhui	2022	0.00415835	0.00274551	0.00541507	0.00529635	0.00490111	0.00211178	0.0020812	0.00234828	0.00279223	0.00419068	0.00207417	0.00379444	0.00160828	0.00778664	0.0031404	0.00478947	0.00611831	0.00671505	0.00279074	0.000517124	0.00415856	0.00387061	0.00363417
Anhui	2023	0.00421022	0.00266709	0.00553982	0.0053908	0.00496213	0.00212243	0.00212653	0.00235911	0.00305563	0.00416984	0.00197349	0.00418357	0.00158103	0.00895816	0.00359086	1.1016e-06	0.00256703	0.000215804	0.0031213	0.000498471	0.00431823	0.00404136	0.00361995
Fujian	2011	0.00103354	0.00197556	0.00104104	0.000879122	0.000776054	0.00288321	0.00241491	0.00282698	0.00297963	0.00173308	0.00245104	0.00116007	0.00218626	0.000282827	0.000800766	0.0010043	0.00097569	8.60188e-05	0.00246419	0.00380012	0.00065917	0.000660979	0.00030204
Fujian	2012	0.00102288	0.00189357	0.00104229	0.000906441	0.000625003	0.00288353	0.00242466	0.00281746	0.00296055	0.00192463	0.00240649	0.00146063	0.00214973	0.000365276	0.000874098	0.00117943	0.00123466	0.00111317	0.00285479	0.00402396	0.00119045	0.00142827	0.000974394
Fujian	2013	0.00103655	0.00175099	0.00122884	0.000944363	0.000765944	0.00288495	0.00242561	0.00281246	0.00287497	0.00211486	0.00236182	0.00176839	0.00173504	0.000430296	0.00101029	0.00150803	0.00176364	0.000610888	0.00316731	0.00414832	0.00167048	0.00200443	0.00196352
Fujian	2014	0.00104268	0.00168683	0.00122121	0.000968342	0.000769073	0.00287506	0.00245763	0.0027932	0.00300184	0.00228139	0.00223114	0.00207718	0.0017677	0.000503796	0.00106616	0.00154714	0.00185707	0.00159792	0.00336124	0.0042478	0.00217308	0.00169137	0.00210986
Fujian	2015	0.00105493	0.00164049	0.00115519	0.00098032	0.000568074	0.00286931	0.00247171	0.0027809	0.0029285	0.00241689	0.00217036	0.00236052	0.0019515	0.00053869	0.000758862	0.00213393	0.00316885	0.00139971	0.00348495	0.00429754	0.00241348	0.00204838	0.00314139
Fujian	2016	0.00105305	0.00153355	0.00114757	0.000892997	0.000540752	0.00286912	0.00248039	0.00277703	0.00279493	0.00272023	0.00218394	0.00265971	0.00196457	0.000536325	0.00257819	0.00198291	0.00474768	0.00155192	0.00351627	0.0044219	0.00256241	0.00254994	0.00244436
Fujian	2017	0.000687363	0.00141948	0.00115905	0.000865163	0.000552668	0.00290554	0.00255336	0.00277713	0.00303469	0.00257575	0.0018238	0.00299093	0.000908156	0.000602516	0.00114647	0.00216213	0.00477858	0.00442749	0.00355258	0.00449651	0.00293768	0.00350402	0.00250783
Fujian	2018	0.00070051	0.00135532	0.0011837	0.000862013	0.000566389	0.00293259	0.0026219	0.00280327	0.00301925	0.00277139	0.0017593	0.00335954	0.000906047	0.000686464	0.000811242	0.00208398	0.00547824	8.68617e-05	0.00369568	0.00452139	0.00333417	0.00350366	0.00327006
Fujian	2019	0.000710842	0.00124482	0.00117352	0.000869193	0.000560732	0.00295427	0.00270499	0.00281947	0.00298691	0.00305341	0.00161659	0.00379282	0.000950757	0.000747519	0.000922985	0.00213491	0.0055577	0.00149558	0.00382555	0.0045276	0.00363857	0.00381845	0.0033721
Fujian	2020	0.000725873	0.00108085	0.0012143	0.00088625	0.000570842	0.0029807	0.00275743	0.00289187	0.00302923	0.00323668	0.00164374	0.00411817	0.000927946	0.000886116	0.000727434	0.00217347	0.00657225	0.00130744	0.00407639	0.00454004	0.00383793	0.00422568	0.00328689
Fujian	2021	0.000735558	0.00100243	0.00121427	0.000894086	0.000575777	0.00300091	0.00279084	0.00295167	0.00304234	0.00344447	0.00156548	0.0047006	0.000954111	0.00106681	0.00112203	0.00177063	0.00493161	0.00378475	0.00284442	0.0045276	0.00421172	0.00459207	0.00334866
Fujian	2022	0.000749785	0.000995298	0.000905275	0.000913966	0.000578545	0.00302302	0.00282912	0.00294413	0.00299944	0.00365343	0.00152604	0.0051365	0.0016282	0.00123225	0.0012198	0.00198188	0.00421503	0.00319578	0.00252764	0.00451517	0.00449699	0.00430125	0.00355786
Fujian	2023	0.000763941	0.000959653	0.000909313	0.000934439	0.000581313	0.00303715	0.00287445	0.00298747	0.0030158	0.00381046	0.00156087	0.00556686	0.00166683	0.00142056	0.000905525	7.95425e-07	0.0018865	0.00444715	0.00311668	0.00450895	0.00461469	0.00444193	0.00355166
Jiangxi	2011	0.00253817	0.0028029	0.00213214	0.00311777	0.002437	0.00278712	0.00147977	0.00293644	0.00229339	0.00137025	0.00318943	0.000708973	0.00299613	0.000598397	0.00184836	0.00139103	0.000166407	0.00027421	0.000678067	0.00401774	0.000129505	0.000514559	0.000234306
Jiangxi	2012	0.00255609	0.00263429	0.00217989	0.00342113	0.00254268	0.00278475	0.00145991	0.00290865	0.00258604	0.00150328	0.00314948	0.000949523	0.00293884	0.000766015	0.00202645	0.00185828	0.000228207	0.000446889	0.000746031	0.0044219	0.000622004	0.0013473	0.000950945
Jiangxi	2013	0.00256909	0.00250597	0.00228721	0.00145853	0.00251319	0.00278321	0.00147104	0.00289645	0.00231248	0.00162736	0.00304474	0.00119404	0.00277734	0.000815782	0.00141885	0.00211788	0.000303985	0.000538796	0.000804091	0.00475766	0.00105156	0.0018933	0.00182405
Jiangxi	2014	0.00257754	0.00235661	0.00229444	0.00153767	0.00254617	0.00277694	0.00158794	0.00287781	0.0027218	0.00173003	0.00286948	0.00144887	0.00277831	0.00091309	0.00151313	0.00241536	0.000512192	0.000572219	0.000866178	0.00502503	0.00157703	0.0017164	0.00222767
Jiangxi	2015	0.00258156	0.00222971	0.00232607	0.00164578	0.00265702	0.00277349	0.00160814	0.00286854	0.00274496	0.00182188	0.00283869	0.00170244	0.00273381	0.000956641	0.00161091	0.00269128	0.000924926	0.000299011	0.000887429	0.00519913	0.00181474	0.00187993	0.00303623
Jiangxi	2016	0.00257289	0.00209925	0.00233718	0.00160085	0.00265558	0.00278129	0.00164633	0.00288176	0.00250403	0.00200978	0.00275511	0.0019501	0.00270364	0.00100534	0.00163186	0.00280522	0.00145464	0.00136391	0.000930484	0.00524265	0.00200732	0.00231048	0.00272529
Jiangxi	2017	0.00260946	0.0019695	0.00234032	0.00168281	0.00264029	0.00281521	0.0017472	0.00287361	0.00275509	0.00196732	0.0024489	0.0022239	0.00275247	0.00128415	0.00193915	0.00293466	0.00223964	0.00235119	0.000966723	0.00525509	0.0024341	0.00320015	0.00258883
Jiangxi	2018	0.00257061	0.00181123	0.00233134	0.00173774	0.00260298	0.00287224	0.0019864	0.0028876	0.00269004	0.00202245	0.00227581	0.00252597	0.00270938	0.00178943	0.00221153	0.00289458	0.00265606	0.000931162	0.0010034	0.00526752	0.00284167	0.00309961	0.00315765
Jiangxi	2019	0.00255434	0.00167542	0.00233635	0.00180506	0.00256302	0.00290918	0.00231462	0.00288975	0.00220206	0.00225297	0.00221348	0.00285739	0.00267763	0.00203803	0.00235121	0.00299305	0.0027105	0.00185627	0.0010659	0.00525509	0.00314091	0.00334202	0.00321458
Jiangxi	2020	0.00261224	0.00155137	0.00233919	0.00189645	0.00257072	0.00294192	0.0025411	0.00288676	0.00238975	0.00248816	0.00232652	0.00315114	0.00275833	0.00259716	0.0014398	0.00357487	0.0034234	0.00279062	0.00116708	0.00524887	0.00337522	0.00370619	0.00319454
Jiangxi	2021	0.00262567	0.00144087	0.0023392	0.00197562	0.0026049	0.00294301	0.00256556	0.00288784	0.00276994	0.00261104	0.00209613	0.00357356	0.00277805	0.00345	0.00167376	0.00368082	0.00293857	0.00311794	0.00150866	0.005224	0.00377792	0.00404034	0.00329729
Jiangxi	2022	0.00265275	0.00136601	0.00249433	0.00208402	0.00255628	0.00294728	0.00257981	0.0028683	0.00226674	0.00276743	0.00203123	0.00388401	0.00258399	0.00452611	0.00181693	0.00380746	0.00192549	0.00218458	0.00168732	0.00521156	0.00399213	0.00371986	0.00353689
Jiangxi	2023	0.00268399	0.00132324	0.00251895	0.00217159	0.00261213	0.0029501	0.00260248	0.0028683	0.00292962	0.00275017	0.00202217	0.00423664	0.00259219	0.00662501	0.00184487	9.82411e-07	0.000749827	0.00200857	0.00181579	0.00518669	0.00412126	0.00389023	0.00350972
Shandong	2011	0.00506641	0.00764645	0.00591287	0.00911302	0.00529372	0.00117474	3.71265e-07	4.78132e-06	0.00153454	0.00497484	0.00233616	0.00102194	0.00192739	0.000380034	0.00692571	0.00272363	0.00260014	0.00419289	0.00418213	0.00084045	0.000341113	0.000432633	0.000257184
Shandong	2012	0.00506714	0.0073014	0.00599921	0.00935715	0.00576252	0.00116206	6.51225e-05	7.61973e-06	0.00174911	0.00534622	0.00228179	0.00129745	0.00188461	0.00106444	0.00770791	0.00325383	0.00321887	0.00424337	0.00426776	0.000852885	0.000840379	0.00129222	0.000899961
Shandong	2013	0.00511859	0.00696561	0.00560034	0.00960002	0.00541636	0.0011795	0.000146056	3.39524e-07	0.00201197	0.00590344	0.00228885	0.00159033	0.00212772	0.00124801	0.0081514	0.00361266	0.00400241	0.00394685	0.00431944	0.000859103	0.00129002	0.00195041	0.00180395
Shandong	2014	0.00514749	0.00662591	0.00580993	0.00987448	0.00549869	0.00120167	0.000192155	0.000147233	0.0024312	0.00621403	0.00214895	0.00188674	0.00203009	0.00119818	0.00952026	0.00373193	0.0044225	0.00804355	0.00439946	0.000877756	0.00180432	0.00165223	0.00205528
Shandong	2015	0.00514214	0.00632934	0.00588566	0.0100655	0.00616849	0.00122387	0.000313317	0.000186158	0.0020722	0.00645748	0.00210217	0.00214666	0.00198696	0.00222933	0.010306	0.00465688	0.00525606	0.000268472	0.00442034	0.000890192	0.002043	0.00183362	0.00314261
Shandong	2016	0.00511706	0.00601387	0.00612411	0.00736669	0.00638417	0.00125794	0.000366894	0.000225311	0.00267439	0.00630245	0.00192287	0.00240053	0.00185318	0.00250687	0.0107739	0.00455559	0.00610801	0.000630221	0.00448076	0.000908845	0.00223298	0.00225781	0.00267213
Shandong	2017	0.00518033	0.00571302	0.00616035	0.00762966	0.00643472	0.00133788	0.000547527	0.000342997	0.00245246	0.00617391	0.00176113	0.00268906	0.00187245	0.00297399	0.0110113	0.0046046	0.00737417	0.00717231	0.00447719	0.000908845	0.00263462	0.00303979	0.00255235
Shandong	2018	0.00516577	0.00539934	0.00621481	0.00783549	0.00636876	0.00143288	0.000792027	0.000453099	0.00236004	0.006352	0.00171209	0.00298156	0.00183826	0.00356097	0.0107145	0.0048214	0.00801718	0.00338174	0.00380996	0.000915063	0.00300845	0.00300693	0.00311251
Shandong	2019	0.00509821	0.00508351	0.00625769	0.00803635	0.0064139	0.00155399	0.00100824	0.000559507	0.00210009	0.00654203	0.00191013	0.0033482	0.00177988	0.00455417	0.0101767	0.0051955	0.00977554	0.00681185	0.00399179	0.000915063	0.00330901	0.00333513	0.0032135
Shandong	2020	0.00507752	0.00482009	0.00628459	0.00825255	0.00652198	0.00162406	0.00114493	0.000575259	0.00279835	0.00690156	0.00194704	0.00359067	0.00175592	0.00564583	0.0100161	0.00514389	0.014153	0.00607655	0.00408146	0.000921281	0.00354194	0.00360197	0.00328022
Shandong	2021	0.0051055	0.00462048	0.00628464	0.00842062	0.00658685	0.00167177	0.00128275	0.000640055	0.00299718	0.00778664	0.00192543	0.00409675	0.00177173	0.00714726	0.00606668	0.00495876	0.0143208	0.00633729	0.00465552	0.000921281	0.00392793	0.0040034	0.00339727
Shandong	2022	0.00511281	0.00450641	0.00618221	0.00868205	0.00663873	0.0017151	0.00135595	0.000701568	0.00304343	0.0082458	0.00191131	0.0044231	0.00182319	0.00881223	0.00419498	0.00540255	0.0138911	0.0180848	0.00424387	0.000915063	0.00419576	0.00369305	0.00363997
Shandong	2023	0.00513094	0.00444581	0.00622173	0.00902983	0.00677293	0.00175041	0.00142395	0.000723236	0.00306391	0.00852377	0.0018739	0.00483628	0.00181511	0.0101083	0.00229534	1.10277e-06	0.00588362	0.00037944	0.00558079	0.000915063	0.00435944	0.00392053	0.00363365
Henan	2011	0.00666138	0.00780721	0.00611112	0.00791183	0.00663716	0.000205628	0.000817751	0.00181076	0.00200039	0.00414957	0.00350467	0.000673262	0.00275766	0.000518567	0.00278771	0.00232039	0.000874898	0.000549893	0.00256807	0.00448408	0.000124886	0.000335839	0.000427131
Henan	2012	0.00666305	0.00754343	0.00617801	0.00818277	0.00706552	0.000153702	0.000828131	0.00177227	0.00206506	0.00446856	0.00342105	0.000914805	0.0027173	0.00147274	0.00276326	0.00266439	0.000999969	0.000512082	0.00264389	0.00471414	0.000644669	0.000977135	0.000995474
Henan	2013	0.0066919	0.00721549	0.00589133	0.00839321	0.00684322	9.58657e-05	0.000788038	0.00163549	0.00221721	0.00482818	0.00338658	0.00116428	0.00291833	0.00194037	0.00309849	0.00304158	0.00141859	0.00150653	0.0027861	0.00508099	0.00110795	0.00158848	0.00190281
Henan	2014	0.00671764	0.0066915	0.00605137	0.00864131	0.00691375	5.04303e-05	0.00079239	0.00168226	0.00168895	0.0050714	0.00319493	0.00141155	0.00282838	0.00142241	0.00273533	0.00319648	0.00186075	0.00122056	0.00285825	0.00538566	0.00167145	0.0013426	0.00205716
Henan	2015	0.00673957	0.006057	0.00618409	0.00881837	0.00775373	3.44666e-07	0.000817728	0.00169825	0.00291262	0.00513525	0.00305021	0.00163146	0.00275758	0.00218705	0.0025293	0.00382264	0.00240886	0.00177116	0.00293014	0.00565924	0.00192903	0.00154378	0.00306556
Henan	2016	0.00676184	0.00544033	0.00622321	0.00741021	0.00778719	5.62448e-06	0.00085492	0.00168582	0.00269835	0.005245	0.00283571	0.00184074	0.0027463	0.00352263	0.00316484	0.00389714	0.00307541	0.00145849	0.00289521	0.00584578	0.00213469	0.00205893	0.00272294
Henan	2017	0.00688415	0.00483079	0.00626043	0.0075494	0.00781872	4.58286e-05	0.000999834	0.0017492	0.00216834	0.00508069	0.00248093	0.00209429	0.00279315	0.00434894	0.00355245	0.00442702	0.0040723	0.00240158	0.00300227	0.00598879	0.00257298	0.00291824	0.00261914
Henan	2018	0.00690804	0.00457414	0.00627869	0.00767551	0.00796881	0.000113193	0.00116098	0.00179752	0.0022261	0.00521608	0.00238133	0.00236995	0.00279548	0.00578014	0.00397498	0.0048339	0.0050015	0.00296744	0.00301865	0.00600744	0.00297049	0.00287743	0.00311896
Henan	2019	0.00687543	0.00438878	0.00632748	0.00779128	0.00802478	0.000239479	0.00130539	0.00182001	0.00237023	0.00575917	0.00227686	0.00270052	0.00274741	0.00610479	0.00290993	0.00511692	0.00501327	0.00311612	0.00323333	0.00603231	0.00330227	0.00315666	0.00321616
Henan	2020	0.00686321	0.00428897	0.00649005	0.0078723	0.00818173	0.000330246	0.00141488	0.00180967	0.00258859	0.00673927	0.00260207	0.00293467	0.00264525	0.00707666	0.00398895	0.00553067	0.00641996	0.00160992	0.00341209	0.00602609	0.00353666	0.0033637	0.00327462
Henan	2021	0.00687127	0.00410718	0.00649009	0.00801386	0.0078428	0.00044322	0.00152748	0.00193279	0.00191998	0.00711678	0.00255032	0.00328815	0.00264965	0.00802903	0.0037061	0.00490213	0.00540909	0.00703949	0.00413513	0.00601987	0.00392129	0.0038021	0.00337796
Henan	2022	0.00687427	0.00463473	0.00668416	0.00817209	0.00813792	0.000585387	0.00165059	0.0019366	0.00257883	0.00742929	0.0025336	0.0035768	0.00254332	0.0100204	0.00286802	0.00536209	0.00484333	0.0109706	0.00463494	0.00600744	0.00419986	0.00343817	0.00358446
Henan	2023	0.00689102	0.00429253	0.00673687	0.00836924	0.0079392	0.000640345	0.00169591	0.00194744	0.00162896	0.00698056	0.0024192	0.00391301	0.0025239	0.0125176	0.00295532	1.10666e-06	0.00205571	0.00353713	0.00521953	0.005995	0.00433354	0.00373657	0.00355561
Hubei	2011	0.00372401	0.00544694	0.00284487	0.00264047	0.00284105	0.00174995	0.0005735	0.00274865	0.00119747	0.00278759	0.00351709	0.000809905	0.00345219	0.000655181	0.00028046	0.00181706	0.000743941	0.00165202	0.00100144	0.000442511	0.000357225	0.000501083	0.000185038
Hubei	2012	0.00375659	0.00531356	0.00295786	0.00284612	0.00295731	0.00174995	0.0005735	0.00274865	0.00182478	0.00311962	0.0034396	0.00106831	0.00332251	0.000796917	0.00315087	0.00202367	0.000962447	0.00256327	0.00100144	0.000479817	0.000860896	0.00127415	0.000927087
Hubei	2013	0.00376942	0.00512876	0.00325178	0.00302745	0.00297681	0.00176427	0.0008539	0.00273493	0.00126455	0.00341647	0.00335594	0.00134358	0.00294855	0.000850243	0.00292389	0.0022473	0.00120155	0.00283032	0.00116664	0.000517124	0.0013086	0.00203566	0.00191172
Hubei	2014	0.00377228	0.00482826	0.00332926	0.00318826	0.00307659	0.00178202	0.000877765	0.00270378	0.00230541	0.00361897	0.0031121	0.00163052	0.00286	0.000822811	0.0026585	0.0023364	0.0014723	0.00212349	0.00127834	0.00052956	0.00187651	0.00180742	0.00207154
Hubei	2015	0.00369712	0.00457844	0.00338238	0.00332127	0.0034745	0.00185176	0.00100047	0.00268065	0.00226404	0.00381001	0.00300223	0.00187723	0.00272186	0.000795938	0.00362578	0.00297744	0.00175849	0.00198308	0.00134182	0.000554431	0.0021227	0.00195052	0.00308468
Hubei	2016	0.00364595	0.00437332	0.00339016	0.00310845	0.00333199	0.0018804	0.0010749	0.00272414	0.00108006	0.00419094	0.0030027	0.00209573	0.00266057	0.000684799	0.0024874	0.00340241	0.00216166	0.00307242	0.00137656	0.000548213	0.00229479	0.00242467	0.00264971
Hubei	2017	0.00369889	0.00419352	0.00340664	0.00322029	0.00339181	0.00192898	0.00125197	0.00273964	0.00202988	0.00408796	0.00266001	0.00236532	0.00269719	0.00114783	0.0016563	0.00345138	0.00295181	0.00282692	0.00141083	0.000554431	0.00270381	0.00332488	0.00264368
Hubei	2018	0.00369737	0.00401823	0.00342208	0.00328824	0.00338387	0.00203608	0.0013941	0.00276479	0.00229281	0.00414208	0.00240471	0.00265441	0.00267897	0.00148532	0.00229184	0.0037933	0.00308939	0.00265746	0.0014907	0.000560649	0.00312197	0.00337689	0.00323111
Hubei	2019	0.00363297	0.00387635	0.00346703	0.00335741	0.00324606	0.0021423	0.00153672	0.00281628	0.0020352	0.00447051	0.0022137	0.00300483	0.00256627	0.00206936	0.00480607	0.00399925	0.00411644	0.00607329	0.00161394	0.000566867	0.0034252	0.00365593	0.00332834
Hubei	2020	0.00370747	0.00312692	0.00360891	0.00344116	0.00324894	0.00217411	0.00162468	0.00282454	0.00188793	0.00490132	0.00254104	0.00298377	0.00249799	0.00277653	0.0038353	0.00419571	0.00506477	0.000221679	0.00169082	0.000566867	0.00359441	0.00388103	0.0033025
Hubei	2021	0.00377086	0.00306988	0.00360885	0.00352116	0.00329336	0.00219688	0.00168531	0.00283289	0.00270803	0.00558919	0.00248918	0.00346811	0.00255957	0.00379517	0.00195661	0.00406415	0.00507507	0.000631131	0.00184499	0.000554431	0.00400023	0.00429983	0.00336504
Hubei	2022	0.00380972	0.00323742	0.00375774	0.00363288	0.00326543	0.00221937	0.00180924	0.00283579	0.00222107	0.00603462	0.00247805	0.00382781	0.00245421	0.00501323	0.00467687	0.00446577	0.00568424	0.00607535	0.00211134	0.000548213	0.0042239	0.00400381	0.00355962
Hubei	2023	0.00386487	0.00304493	0.00377152	0.00370639	0.00330864	0.00223678	0.00185456	0.00285746	0.00281495	0.00615073	0.00242655	0.00422052	0.00249283	0.00625789	0.00172265	1.05532e-06	0.00250303	0.00376316	0.00252536	0.000541995	0.0043542	0.00422078	0.00355709
Hunan	2011	0.00390846	0.00591777	0.00321664	0.0036761	0.0035041	0.00229441	0.00100622	0.00265456	0.00134692	0.00296447	0.00378608	0.000696325	0.00314225	0.00170146	0.0023093	0.00190411	0.000658598	0.000932769	0.000943879	0.00411723	0.000144113	0.000577769	0.000257265
Hunan	2012	0.00396012	0.00587874	0.00316012	0.00386864	0.00365154	0.00226233	0.000948454	0.00259165	0.00217788	0.00323877	0.00364627	0.000929932	0.00327277	0.0020003	0.00247343	0.0021623	0.000866805	0.00124578	0.000982674	0.00480119	0.000660351	0.00134409	0.000948003
Hunan	2013	0.00402505	0.00583247	0.00360679	0.00405442	0.00348762	0.00226678	0.000918583	0.00256054	0.000857193	0.00333542	0.0033807	0.00117916	0.00280851	0.00219469	0.00262358	0.00249455	0.00111106	0.00147108	0.00105983	0.0055038	0.00109076	0.00179993	0.00193411
Hunan	2014	0.00407885	0.00581593	0.00362788	0.00423516	0.00357861	0.00226868	0.000919059	0.00255471	0.00224911	0.00351642	0.00312374	0.00143488	0.00283832	0.0025372	0.00281564	0.00269267	0.00132736	0.00283684	0.00110834	0.00636807	0.00159519	0.00156955	0.00196466
Hunan	2015	0.00405653	0.00569951	0.00364197	0.00440364	0.00369042	0.0022748	0.000962665	0.00254341	0.00251932	0.00374224	0.00309134	0.0016661	0.00280199	0.0029864	0.0034896	0.00326553	0.00151423	6.68516e-05	0.00110908	0.00717017	0.00180626	0.00179426	0.0030779
Hunan	2016	0.00409239	0.00558762	0.00366506	0.0045581	0.00363999	0.00227525	0.00104634	0.00253593	0.00207475	0.00405484	0.00304062	0.00189868	0.00281231	0.00333225	0.00342674	0.00352388	0.00161723	0.00109454	0.00113486	0.00799092	0.0019788	0.00227911	0.00253729
Hunan	2017	0.00387085	0.0053304	0.00368142	0.00467749	0.00366563	0.00228099	0.00110613	0.00253019	0.00218968	0.00345313	0.00235901	0.00214801	0.00258438	0.00396822	0.00290643	0.00377818	0.00218814	0.00104757	0.00115202	0.00855052	0.00237988	0.00311224	0.00254456
Hunan	2018	0.00377172	0.00514226	0.0037034	0.00474106	0.0036046	0.0022938	0.00114846	0.00252815	0.00262093	0.00355578	0.00225566	0.00243486	0.00246917	0.00437899	0.00312643	0.00446932	0.00282748	0.00307673	0.00117293	0.00893602	0.0027515	0.00299302	0.00306118
Hunan	2019	0.00377723	0.00495284	0.00371807	0.0048422	0.00354671	0.00235971	0.00134353	0.00254554	0.00234984	0.00427873	0.00244912	0.00275782	0.0024606	0.00508262	0.00255025	0.00472571	0.00312397	0.00286835	0.00119286	0.00912255	0.00301156	0.00326318	0.00323497
Hunan	2020	0.00390759	0.00290948	0.00373843	0.00493111	0.00359522	0.00238526	0.00143641	0.00255407	0.00248152	0.00504566	0.0027152	0.00305287	0.00256397	0.00569396	0.00273183	0.00476933	0.00426285	0.0041122	0.00120864	0.00918473	0.0032264	0.00364428	0.00322548
Hunan	2021	0.00395654	0.00278472	0.00373843	0.00499749	0.00366659	0.00240788	0.00167067	0.00259644	0.00275902	0.00514986	0.00250658	0.00347709	0.0026099	0.00670123	0.00334642	0.00458249	0.00357349	0.00331274	0.00302454	0.00919717	0.00361854	0.00396427	0.00331278
Hunan	2022	0.00399756	0.00272768	0.00335432	0.00505788	0.00359871	0.00242333	0.00187723	0.00265162	0.00225377	0.00549475	0.00252627	0.00378735	0.00306591	0.00762934	0.00353848	0.00480667	0.00314383	0.00553341	0.00303647	0.0092096	0.00386993	0.00370799	0.00351633
Hunan	2023	0.00405557	0.00268491	0.00340474	0.0051213	0.00365889	0.00243561	0.00203588	0.00273829	0.00287554	0.00552196	0.00246714	0.00412827	0.00306549	0.00962231	0.0031823	1.11073e-06	0.00114932	0.0063951	0.00289586	0.00919095	0.00398387	0.00385375	0.00349325
Guangdong	2011	0.00210819	0.00492821	0.0021388	0.00176268	0.00160436	0.00230016	0.00115012	0.00297625	0.00271117	0.00287873	0.00131224	0.00114444	0.00229633	0.000217844	0.00308802	0.00203003	0.00219182	0.0052712	0.0104501	0.000517124	0.000660566	0.000794243	0.00049944
Guangdong	2012	0.00213525	0.0048371	0.00214035	0.00182482	0.00152577	0.00228042	0.00115474	0.00297197	0.00277271	0.00306747	0.0013069	0.00141971	0.00233723	0.000535067	0.00404831	0.00260562	0.00250671	0.00250855	0.0109358	0.000523342	0.00117573	0.00152591	0.00106852
Guangdong	2013	0.00216744	0.00300929	0.00201468	0.00187659	0.00155008	0.00228754	0.00124059	0.00295734	0.00225028	0.00326837	0.00127653	0.00168482	0.00259534	0.00081001	0.00368515	0.00287465	0.0032255	0.0098014	0.0113732	0.000535778	0.00162644	0.00215758	0.00194522
Guangdong	2014	0.00218947	0.00325524	0.00201496	0.00192781	0.00159991	0.00226004	0.00118226	0.00295273	0.00246302	0.00346749	0.00121981	0.00197684	0.00263211	0.00105187	0.000926477	0.00269267	0.00372431	0.0167087	0.0121046	0.000541995	0.00212378	0.00180036	0.00202995
Guangdong	2015	0.00220816	0.00344773	0.00201529	0.00197671	0.00142467	0.00222674	0.00115692	0.00294635	0.00246018	0.00366553	0.00119922	0.00225332	0.00266315	0.0011317	0.000863622	0.00392051	0.00463953	0.00587283	0.0122173	0.000541995	0.00240188	0.00202314	0.00299252
Guangdong	2016	0.00222983	0.00365804	0.00201583	0.00174422	0.00141564	0.00220466	0.00115986	0.00296033	0.00261721	0.00405242	0.00119224	0.00253893	0.00269884	0.00135333	0.000748386	0.00345479	0.00680032	0.0107988	0.0122966	0.000548213	0.0025582	0.00245769	0.00234929
Guangdong	2017	0.00194624	0.0038933	0.00201935	0.00175961	0.00142094	0.0022178	0.00117559	0.00295641	0.00287074	0.00397721	0.00104397	0.00285328	0.00221382	0.00162279	0.00176455	0.0036429	0.00926937	0.0163423	0.0130357	0.000554431	0.00294318	0.0034381	0.00242982
Guangdong	2018	0.00197061	0.00410718	0.00202007	0.00177416	0.00140276	0.00234851	0.00161242	0.00296781	0.00267759	0.00421849	0.00102016	0.00319749	0.00225383	0.00194478	0.000556327	0.0043931	0.00999183	0.0178581	0.0132974	0.000554431	0.00333555	0.00345696	0.00320552
Guangdong	2019	0.00200729	0.00436026	0.00201788	0.00179378	0.00145969	0.0023753	0.00175282	0.00297834	0.00297118	0.00481281	0.00104816	0.00360685	0.00231924	0.00236826	0.000881082	0.00462435	0.0116979	0.0138582	0.013343	0.000548213	0.00363139	0.00382669	0.00338365
Guangdong	2020	0.00205167	0.00470603	0.00202158	0.00182387	0.00149195	0.00240432	0.00184965	0.00299225	0.00301539	0.00531584	0.00112057	0.00393544	0.00238814	0.00337713	0.0011779	0.00543609	0.0160821	0.0135144	0.0135225	0.000554431	0.00381354	0.00425295	0.00328071
Guangdong	2021	0.00207355	0.00261362	0.00202164	0.00184592	0.00150675	0.00243787	0.00198058	0.00298717	0.00302122	0.0055957	0.00104324	0.00447173	0.00242495	0.00612752	0.00228835	0.0053572	0.0135534	0.0243153	0.00634304	0.000566867	0.00412967	0.00461418	0.003335
Guangdong	2022	0.00209946	0.00250312	0.0017595	0.00187008	0.00152071	0.00245787	0.00201321	0.0029658	0.00293498	0.00600203	0.00107403	0.00479207	0.00296893	0.0103988	0.000870606	0.00515488	0.0120592	0.0168738	0.00517992	0.000573084	0.00441899	0.00426595	0.0035831
Guangdong	2023	0.00211535	0.00238192	0.00175946	0.00189265	0.00151313	0.00246731	0.00205854	0.00297663	0.0029182	0.00621669	0.00105979	0.00517503	0.00299953	0.0128608	0.000486487	1.11486e-06	0.00402006	0.0162885	0.00702488	0.000560649	0.00453141	0.00440946	0.00360736
Guangxi	2011	0.00277775	0.00550806	0.00172194	0.00223203	0.00168729	0.00229333	0.00223466	0.0030481	0.0020293	0.00214355	0.00471238	0.000428744	0.00438097	8.00355e-05	0.00288199	0.00152076	0.000329735	0.00061153	0.000483298	0.00113269	0.000194061	0.000399477	0.00043955
Guangxi	2012	0.00281824	0.00520863	0.00173654	0.00235558	0.00168296	0.00226267	0.00219942	0.00302323	0.00265778	0.0022595	0.00449376	0.000649703	0.0044165	0.00013912	0.00333246	0.00178247	0.000679198	2.18568e-05	0.000549216	0.00119486	0.000693435	0.00104676	0.00105986
Guangxi	2013	0.00284388	0.00519794	0.00179118	0.00249757	0.0017979	0.00223041	0.00217102	0.00300394	0.00257082	0.00244275	0.00437177	0.000872646	0.004307	0.000325704	0.00352452	0.00179614	0.00116183	5.60154e-05	0.000596023	0.00125082	0.00112847	0.00157362	0.00184072
Guangxi	2014	0.00274647	0.00509813	0.00180771	0.00263763	0.00181306	0.002216	0.00210389	0.00297569	0.00219332	0.00257615	0.00414803	0.0010934	0.00407822	0.000606736	0.00386324	0.00188976	0.00122362	0.00057006	0.000668366	0.00130057	0.00163676	0.00142538	0.00200282
Guangxi	2015	0.00284272	0.00455275	0.00183048	0.00281653	0.00169126	0.00221028	0.00203778	0.00295197	0.00267912	0.00274894	0.00411224	0.00128768	0.00419576	0.000780443	0.00393657	0.00240271	0.00138769	0.000284602	0.000739508	0.00135653	0.0018735	0.00156955	0.00326337
Guangxi	2016	0.00284771	0.00423194	0.00186355	0.0026071	0.00167417	0.00219921	0.00179351	0.00292848	0.00285734	0.0030221	0.00411242	0.00150911	0.00411639	0.00110344	0.0040553	0.0027694	0.00111768	0.000470729	0.00084539	0.00137518	0.00205809	0.00209092	0.00288104
Guangxi	2017	0.00276524	0.00388617	0.00189239	0.00270658	0.0016158	0.00219103	0.00209265	0.00293662	0.00293382	0.00309647	0.00418625	0.00174866	0.00389353	0.00156723	0.00438704	0.00312372	0.00137592	0.00052157	0.000920795	0.0013814	0.00247937	0.00291777	0.00260567
Guangxi	2018	0.00276642	0.00357962	0.00193726	0.00277679	0.00161856	0.00223358	0.00215568	0.00294202	0.00296732	0.00324234	0.00399425	0.00202376	0.00378642	0.00212067	0.0044883	0.00317061	0.00156794	0.000727077	0.000964385	0.00139383	0.00288402	0.00284267	0.00305902
Guangxi	2019	0.00277433	0.0033194	0.00194477	0.00284451	0.00156946	0.00224816	0.00219126	0.00293788	0.00289609	0.00365082	0.004299	0.00233151	0.00378242	0.00241951	0.0054486	0.00360816	0.0019277	0.00129384	0.00113273	0.00139383	0.00315095	0.0030564	0.00312505
Guangxi	2020	0.00282985	0.00301642	0.00196652	0.00289109	0.00161519	0.00226844	0.00223926	0.00292558	0.00287337	0.003938	0.00432536	0.00261402	0.00382747	0.0031727	0.00507147	0.00436701	0.00271565	2.92135e-05	0.00126974	0.00139383	0.00333064	0.00327848	0.00312829
Guangxi	2021	0.00286285	0.00293087	0.00196649	0.00287966	0.00163505	0.00224885	0.0022799	0.00296142	0.00296587	0.00436141	0.00437495	0.0029979	0.00388466	0.00463427	0.00633906	0.00365933	0.00272742	0.000500027	0.00215241	0.00138762	0.00366175	0.00369129	0.00322067
Guangxi	2022	0.00290697	0.00298433	0.00174632	0.0028333	0.001643	0.00226188	0.00233051	0.00295496	0.00280272	0.00464835	0.0043761	0.0032632	0.00455915	0.00599954	0.00644731	0.00355921	0.00257292	0.000409942	0.0019229	0.00138762	0.00388706	0.00338787	0.00342144
Guangxi	2023	0.00294503	0.00288453	0.00192358	0.00285278	0.00164577	0.00226979	0.00237584	0.00297663	0.00291648	0.00484981	0.00442832	0.00356657	0.00413477	0.00762002	0.00499464	9.47412e-07	0.000858712	0.00112876	0.00246439	0.00138762	0.00396643	0.00356022	0.00337849
Hainan	2011	0.000353159	0.000741892	0.000168381	0.000266952	0.000192555	0.00323779	0.00267378	0.00324328	0.00270031	0.000535416	0.00707758	0.00062664	0.0036289	9.73871e-05	0.000437599	0.000510584	0.000106815	3.31451e-05	2.95942e-05	0.00118865	0.000312003	0.00054579	0.000523707
Hainan	2012	0.000360818	0.000707102	0.00017958	0.00029377	0.000180639	0.00324845	0.00283735	0.00322154	0.00303251	0.000590704	0.00674611	0.00087835	0.00354661	0.000181603	0.000374744	0.000597461	0.000156107	6.02595e-05	4.35852e-05	0.00128191	0.000833505	0.00121939	0.00114753
Hainan	2013	0.000357798	0.000640302	0.000184644	0.000310803	0.000196045	0.00323857	0.00275029	0.00320053	0.00295662	0.000634208	0.00644282	0.00112287	0.00343688	0.000354483	0.0001757	0.000671847	0.000229679	4.76888e-05	5.32162e-05	0.00135031	0.00128723	0.0017825	0.00199244
Hainan	2014	0.000363156	0.000626685	0.000183427	0.000322349	0.00019087	0.00322941	0.00283138	0.00314889	0.00285123	0.000708508	0.00625661	0.00139828	0.00351632	0.000383771	0.000161732	0.000706949	0.000275293	8.11424e-05	6.48576e-05	0.00148088	0.00181614	0.00157319	0.00202219
Hainan	2015	0.000356416	0.000606581	0.00018836	0.000318007	0.000152234	0.00322127	0.00283365	0.00310194	0.00304656	0.000758212	0.0062454	0.00163263	0.00336804	0.000432394	0.000238556	0.000793558	0.00033415	8.00855e-05	8.45373e-05	0.00161146	0.00204461	0.00190592	0.00352197
Hainan	2016	0.000346067	0.00059767	0.000219821	0.000321786	0.000142124	0.00322378	0.00296447	0.00316401	0.00270563	0.000859713	0.00633117	0.00187697	0.00285749	0.000446186	0.000559819	0.000865013	0.000317228	0.000106866	9.25754e-05	0.00186017	0.00223614	0.00228494	0.00257619
Hainan	2017	0.000292566	0.000583696	0.000218973	0.000362192	0.000132496	0.00322021	0.00297852	0.00315385	0.00306871	0.000872501	0.00583401	0.00213957	0.00231306	0.000562029	0.000256016	0.00095856	0.000456278	4.27665e-05	0.000107625	0.00213997	0.00270125	0.00311049	0.00246589
Hainan	2018	0.00029421	0.00056074	0.000220466	0.000359171	0.000143328	0.00323469	0.00320874	0.00317663	0.00305297	0.000904973	0.00559421	0.00240916	0.00231536	0.0010426	0.000458551	0.0011	0.00054162	0.000178067	0.000125093	0.00228298	0.00314179	0.00313935	0.00302317
Hainan	2019	0.000276958	0.000553825	0.000220642	0.000370869	0.0001408	0.00324489	0.00325162	0.00312234	0.00307395	0.00101144	0.00549934	0.00268797	0.00213581	0.00121587	0.000556327	0.00121437	0.000874898	0.000302708	0.000136868	0.00233894	0.00341044	0.00329148	0.00308889
Hainan	2020	0.000277253	0.000538284	0.000222557	0.000396932	0.000141402	0.0032626	0.00328813	0.00312202	0.00304744	0.00110264	0.0055494	0.00297705	0.00212112	0.00144807	0.000430615	0.00129727	0.001462	0.00011477	0.000157862	0.0023949	0.00358716	0.00353519	0.00307152
Hainan	2021	0.000280973	0.000531903	0.000222549	0.000408458	0.000142004	0.00327152	0.00331121	0.0030823	0.00305327	0.0012369	0.00523255	0.00342281	0.00215933	0.001828	0.000105861	0.00125936	0.00159663	0.000251311	0.00054311	0.0023949	0.00393744	0.00396167	0.00316484
Hainan	2022	0.000282104	0.000546161	0.000268574	0.00040925	0.000142726	0.00328181	0.00332773	0.00307413	0.00307402	0.00141513	0.00562066	0.00368098	0.00179007	0.00214704	0.000224588	0.00128316	0.0012479	0.000470685	0.00039049	0.00238246	0.00419654	0.00361789	0.00333771
Hainan	2023	0.00028924	0.000528338	0.00027382	0.000410233	0.000143207	0.0032875	0.00335039	0.00305247	0.00307581	0.00151093	0.00539359	0.00407544	0.00181605	0.00236268	0.000273476	7.26238e-07	0.000626227	0.00059862	0.000668274	0.00237003	0.00426541	0.00379327	0.00334831
Chongqing	2011	0.00156342	0.00195756	0.000708204	0.000795238	0.0013226	0.00300601	0.00327506	0.0030272	0.00248225	0.000717624	0.00224753	0.000578034	0.00579579	0.000170531	0.00172963	0.000960947	0.000573256	0.000541027	0.000614414	0.00252547	0.000413189	0.000435841	0.000238882
Chongqing	2012	0.00159379	0.00182292	0.000720434	0.000811709	0.00124268	0.00300388	0.00329418	0.00300991	0.00278131	0.00081234	0.0021938	0.000806433	0.00582565	0.000215925	0.00196709	0.00123827	0.000748355	0.000625809	0.000646099	0.00275553	0.000896665	0.0011704	0.000911154
Chongqing	2013	0.00161174	0.00169424	0.000686754	0.000839704	0.00134812	0.00300086	0.0033197	0.00298898	0.00274496	0.000889734	0.002116	0.00104624	0.00619201	0.000310869	0.000709974	0.00136183	0.000937433	0.00109887	0.000667534	0.00301046	0.00132504	0.00183416	0.00190543
Chongqing	2014	0.00162324	0.00158267	0.000689275	0.000873452	0.00134379	0.00299788	0.00331782	0.00297854	0.00287198	0.000946009	0.00197559	0.00129344	0.00622035	0.000265488	0.00073791	0.00140854	0.00152012	0.000771844	0.000687768	0.00332757	0.00186534	0.00161683	0.00209245
Chongqing	2015	0.0016399	0.00149897	0.000701311	0.000916255	0.00123125	0.00299565	0.00332322	0.00296404	0.00302501	0.00104522	0.00194243	0.00154513	0.00618662	0.000361157	0.00068553	0.00160028	0.00302244	0.000892895	0.000686198	0.00343949	0.00210047	0.00176335	0.00315479
Chongqing	2016	0.00165163	0.00142373	0.000705441	0.000930632	0.00126399	0.0030032	0.0033367	0.00296293	0.0029379	0.00120466	0.00195016	0.00180405	0.00620131	0.000373691	0.000657594	0.00168072	0.00180484	0.00224349	0.000691279	0.00349545	0.00227843	0.00219069	0.00271724
Chongqing	2017	0.00152886	0.00136569	0.000709877	0.000956387	0.00126603	0.00300657	0.00333981	0.00296061	0.00298487	0.00115907	0.00173818	0.00207414	0.00563286	0.000496512	0.000626167	0.00167867	0.00243608	0.000116445	0.000705048	0.00348923	0.0026595	0.00314975	0.00254955
Chongqing	2018	0.00153306	0.00132189	0.000713125	0.00101371	0.00126531	0.00301769	0.00334606	0.00296986	0.00302493	0.00126296	0.0017925	0.00235767	0.00562486	0.000759939	0.000716958	0.00177141	0.00249199	0.000227511	0.000699014	0.0035141	0.00304195	0.00298279	0.00308198
Chongqing	2019	0.00153177	0.0012893	0.000714022	0.00104145	0.00126038	0.00302781	0.00336077	0.00299224	0.00301954	0.0014607	0.00173894	0.00269296	0.00561214	0.000762519	0.000853146	0.00188126	0.00225804	0.00244365	0.000711732	0.00350788	0.0033204	0.0032477	0.00321175
Chongqing	2020	0.00154436	0.0012769	0.000714798	0.00106675	0.00126784	0.00303387	0.00336841	0.00300161	0.00296077	0.00174563	0.00191371	0.00299752	0.00565999	0.000860019	0.000744894	0.00201274	0.0030504	0.00144446	0.000726539	0.00350167	0.00351755	0.00360644	0.00318318
Chongqing	2021	0.00156162	0.00123413	0.000714774	0.00109291	0.00128156	0.00303763	0.00337219	0.00300741	0.00303287	0.00187492	0.00182578	0.00342858	0.00573423	0.00113756	0.000779814	0.00196204	0.00226098	0.00245667	0.000754853	0.00349545	0.0038704	0.00392372	0.00327938
Chongqing	2022	0.00159441	0.00131611	0.000680312	0.00111807	0.00125749	0.00303914	0.00337306	0.00300913	0.00280745	0.00196693	0.00183047	0.00372941	0.00617269	0.00154356	0.000709974	0.00190212	0.00186296	0.00243494	0.000780585	0.00348923	0.00412889	0.00363192	0.00348533
Chongqing	2023	0.00160718	0.0012163	0.000693926	0.00113383	0.00128529	0.0030406	0.00337306	0.00301997	0.00300517	0.00202641	0.00182356	0.00410322	0.00610825	0.00186414	0.00066807	7.95676e-07	0.000838112	0.00366354	0.000800395	0.0034768	0.00427702	0.00383811	0.00346573
Sichuan	2011	0.0044554	0.00695884	0.00302069	0.00253031	0.00392801	0.00225206	0.00233255	0.00212915	0.00196353	0.00325861	0.00381787	0.000553235	0.00403849	0.00221492	0.00544511	0.00263527	0.000944054	0.00226761	0.00133689	0.00052956	0.000291165	0.00055456	0.000293869
Sichuan	2012	0.00449839	0.00672001	0.00309572	0.00273368	0.00390358	0.00224335	0.00236865	0.00207931	0.0023891	0.00360532	0.00371482	0.000783122	0.00396645	0.00292066	0.00485496	0.00316273	0.00138107	7.78295e-05	0.00140521	0.000541995	0.000778186	0.0012812	0.00106035
Sichuan	2013	0.00451022	0.00653822	0.00303983	0.00293032	0.00404295	0.00225248	0.00237688	0.00206819	0.00190913	0.00373498	0.00348777	0.00101846	0.00407001	0.00344967	0.00295183	0.00358198	0.00166652	0.00098919	0.00147495	0.000541995	0.0012043	0.00181822	0.00188974
Sichuan	2014	0.00450384	0.00635999	0.00310017	0.00308747	0.00402827	0.00225711	0.00238978	0.00204209	0.00240701	0.00392054	0.00332238	0.00125821	0.00396554	0.00349322	0.00229883	0.00399144	0.00168197	0.000879931	0.00153094	0.000566867	0.0017258	0.00163757	0.00186989
Sichuan	2015	0.00451386	0.00619745	0.00318352	0.00327301	0.00405198	0.00225886	0.0024005	0.00202143	0.00266674	0.00425987	0.00328479	0.0014813	0.00384814	0.00372264	0.00343023	0.00447453	0.00216975	0.00256299	0.00157936	0.000579302	0.00193526	0.0018164	0.00317815
Sichuan	2016	0.00453204	0.00602136	0.00327862	0.00316885	0.00414261	0.00226294	0.0024203	0.00201911	0.00277752	0.0045739	0.00320147	0.00171833	0.00372837	0.0039467	0.0034861	0.00477416	0.00303274	0.00208767	0.00165577	0.00058552	0.00209551	0.00224426	0.00267865
Sichuan	2017	0.00445986	0.00585204	0.0033508	0.00328497	0.00416548	0.00229701	0.00247214	0.00203418	0.00291947	0.00466014	0.00309101	0.00197222	0.00355219	0.00448409	0.0049248	0.00494034	0.00429596	0.00303624	0.0017053	0.00058552	0.00247006	0.00315328	0.00259505
Sichuan	2018	0.00447879	0.00569698	0.00342285	0.00342432	0.00417125	0.00232968	0.00257356	0.00215126	0.00272406	0.0048265	0.00291528	0.00224611	0.0034764	0.0047671	0.00525654	0.00632964	0.00388911	0.00264353	0.00179932	0.000597956	0.00283828	0.0030923	0.00308014
Sichuan	2019	0.0045153	0.00555974	0.00344897	0.00348384	0.00417703	0.00238991	0.00268656	0.00211823	0.00284074	0.00530713	0.00275979	0.0025781	0.00347974	0.00340104	0.00464893	0.0062212	0.00392957	0.00460954	0.00186566	0.000597956	0.00310756	0.00334577	0.0031922
Sichuan	2020	0.00458905	0.00542607	0.00349521	0.00353827	0.00421181	0.00244783	0.00278084	0.00216608	0.00261554	0.00622659	0.00306578	0.00289033	0.00349468	0.0042351	0.00592002	0.00646712	0.00529873	0.00544359	0.00186666	0.000597956	0.00331751	0.00361667	0.00317436
Sichuan	2021	0.00465958	0.00529775	0.00349516	0.0035989	0.00427765	0.00246554	0.00280704	0.00218612	0.00288283	0.00634225	0.00281481	0.00329856	0.00356534	0.00579603	0.00607716	0.0064224	0.00504123	0.00628872	0.00248798	0.00058552	0.00366341	0.00394543	0.00328838
Sichuan	2022	0.00476648	0.00563995	0.00347522	0.0036668	0.00419147	0.00247905	0.00282912	0.00220744	0.00262799	0.00667235	0.00281365	0.00357063	0.003699	0.00714045	0.00564066	0.0065635	0.00456302	0.00252019	0.00267736	0.00058552	0.00388105	0.00369985	0.0034828
Sichuan	2023	0.0047839	0.00540112	0.00349759	0.00374563	0.00429173	0.00248976	0.00282912	0.00223994	0.00291055	0.00675414	0.00269416	0.00389441	0.00368659	0.00824191	0.00607716	1.29757e-06	0.00211678	0.00929837	0.00299749	0.00058552	0.00401475	0.00389069	0.00350714
Guizhou	2011	0.00231933	0.00418699	0.00132432	0.00133501	0.00102171	0.00301326	0.00340775	0.00301068	0.00120461	0.000648426	0.00342142	5.57659e-05	0.00474566	1.28595e-06	0.00118488	0.00134507	0.000172293	0.000369095	0.000407652	0.00128813	1.23147e-05	0.000222468	0.000370836
Guizhou	2012	0.00239531	0.00416792	0.00134053	0.00152876	0.00136449	0.00299345	0.00340818	0.00297596	0.00268174	0.000836296	0.00349779	0.00021944	0.00486823	6.1756e-05	0.0012198	0.00174774	0.000271614	0.000133633	0.000467409	0.00157415	0.000515126	0.000889967	0.00105136
Guizhou	2013	0.00249273	0.00413484	0.00099186	0.00163059	0.00120598	0.00299712	0.00343017	0.00293877	0.00196776	0.000993165	0.00341824	0.000402705	0.00704798	0.000180192	0.00140488	0.00193332	0.000523963	0.000255297	0.00053606	0.0018726	0.000941779	0.00127008	0.00171906
Guizhou	2014	0.00255211	0.00410368	0.00105844	0.00179576	0.00133656	0.00297833	0.00343142	0.00292302	0.00262012	0.00130874	0.00371663	0.000594457	0.00677105	0.000533414	0.00127218	0.00215964	0.000806476	0.000336618	0.000622724	0.00218971	0.00148219	0.00114837	0.00220088
Guizhou	2015	0.0025642	0.00406989	0.00115977	0.00188438	0.00142334	0.00296674	0.00342468	0.0029181	0.00291313	0.00173844	0.00420869	0.000771929	0.00618425	0.000634016	0.000992825	0.00258004	0.00101321	0.000426128	0.000704491	0.00253169	0.00170862	0.00134794	0.00328846
Guizhou	2016	0.00258988	0.00398195	0.00118721	0.00147897	0.00148798	0.00296682	0.0034257	0.00290022	0.00283571	0.00198684	0.00422385	0.00094637	0.00610256	0.000795748	0.00158297	0.00303929	0.00135164	0.000320532	0.000751889	0.00291719	0.00192048	0.00188224	0.00282289
Guizhou	2017	0.00261929	0.00288103	0.00121878	0.00158552	0.00146162	0.00300565	0.003432	0.0028993	0.00288189	0.00220625	0.00404149	0.00113951	0.00601228	0.00102901	0.00110457	0.00295561	0.00155543	0.000372919	0.000842949	0.00335244	0.00242606	0.00269237	0.00252843
Guizhou	2018	0.00253364	0.00265625	0.00124075	0.00173371	0.00124172	0.00303557	0.00348361	0.00285713	0.00286412	0.00234875	0.00392595	0.00134956	0.00567116	0.00148682	0.00105219	0.00321051	0.00165254	0.000708428	0.000873454	0.0037566	0.00285161	0.00250941	0.00298615
Guizhou	2019	0.00253571	0.0024263	0.00126711	0.00181565	0.00123149	0.00306606	0.00352694	0.00297532	0.00297388	0.00253545	0.00365696	0.00160752	0.00554817	0.00170764	0.0010033	0.00482336	0.00155985	0.000599018	0.000933766	0.00396178	0.00312302	0.00255568	0.00307026
Guizhou	2020	0.00253279	0.00218943	0.00128105	0.00188985	0.00123919	0.00308739	0.00354478	0.00296135	0.00290687	0.00286083	0.00383386	0.00182725	0.00547466	0.00209694	0.00182741	0.00494604	0.00184089	0.000562808	0.00104646	0.00412345	0.00334418	0.00268978	0.00304986
Guizhou	2021	0.00250813	0.0021324	0.00128106	0.00198326	0.00128409	0.00310096	0.00357594	0.00297421	0.00297169	0.0030918	0.00375064	0.00212825	0.00541121	0.00229977	0.0021801	0.00352865	0.00140976	0.00132688	0.001516	0.0043535	0.00369316	0.00316254	0.00316
Guizhou	2022	0.00247831	0.00239974	0.0013049	0.00205939	0.0013078	0.00310373	0.00357703	0.0030308	0.00277038	0.00324194	0.00381789	0.00233918	0.0052271	0.00257869	0.00153757	0.00334233	0.00114638	6.80094e-05	0.00148157	0.00445299	0.00390787	0.00282997	0.00327662
Guizhou	2023	0.00247118	0.0022429	0.00135912	0.00210742	0.00131394	0.00310698	0.00357703	0.00304163	0.00289978	0.00327307	0.00372244	0.00261453	0.00497816	0.00312267	0.0012233	9.69592e-07	0.000443035	0.000118243	0.00168736	0.00442812	0.00405287	0.00314216	0.00322074
Yunnan	2011	0.00309315	0.00595128	0.00184921	0.00192479	0.0019806	0.00249794	0.00264425	0.00246497	0.0016277	0.001439	0.00427563	0.000222167	0.00460437	0.000744023	0.00202296	0.00197914	0.000404042	0.000302596	0.000581247	0.00058552	5.96849e-05	0.000445788	0.00026372
Yunnan	2012	0.00321204	0.00566846	0.00190213	0.00211157	0.00199709	0.00245076	0.00248177	0.00235608	0.00192704	0.00169794	0.00432544	0.00041064	0.00466716	0.000880535	0.00218359	0.00250446	0.000576199	0.000182425	0.000645919	0.00064148	0.000546384	0.00112569	0.00107342
Yunnan	2013	0.0033191	0.00548756	0.00188076	0.00226025	0.00216162	0.00240811	0.0024941	0.00229838	0.00217992	0.00195833	0.00431712	0.000607545	0.004922	0.00128434	0.00304961	0.0026028	0.000841791	0.000331373	0.00072528	0.000728529	0.00100623	0.00157051	0.00197414
Yunnan	2014	0.00334085	0.00533079	0.00193978	0.00237009	0.00220579	0.00237011	0.00243873	0.00225085	0.00243418	0.00210197	0.00418376	0.000789105	0.00478736	0.00138076	0.00251882	0.00287065	0.00109561	0.000321696	0.000769166	0.000865321	0.00156081	0.00147158	0.00202635
Yunnan	2015	0.00333671	0.0051994	0.00199886	0.00245967	0.00212227	0.00234585	0.00240648	0.00222798	0.00232763	0.00218493	0.00406504	0.000984013	0.00461592	0.00149351	0.00252232	0.0030979	0.00155837	0.000558427	0.000809172	0.000946152	0.00178359	0.00162656	0.00323666
Yunnan	2016	0.00332676	0.00518382	0.0020615	0.00254134	0.00215091	0.00232786	0.00240754	0.00219741	0.00244401	0.00235817	0.00399645	0.00117688	0.00443503	0.00146481	0.00268295	0.00344262	0.00225362	0.001024	0.000844374	0.00104564	0.00197065	0.00210119	0.00278707
Yunnan	2017	0.00315112	0.004849	0.00211245	0.00261261	0.00218497	0.0023455	0.00242853	0.00215165	0.00278043	0.00252432	0.00384238	0.00138578	0.00402425	0.00146678	0.00205788	0.00325866	0.0031843	3.71135e-05	0.000909751	0.00113269	0.00238056	0.00295348	0.00252104
Yunnan	2018	0.00319811	0.00454669	0.00216899	0.00197422	0.00220555	0.00241607	0.00254375	0.00215669	0.00287643	0.0026878	0.00375938	0.0016104	0.00397146	0.00148452	0.0033988	0.0040668	0.00305923	0.000504019	0.000933822	0.00116378	0.00279679	0.0029105	0.00301106
Yunnan	2019	0.00322071	0.00442268	0.00219859	0.00199008	0.00221699	0.00248071	0.00266047	0.0021301	0.00193389	0.00326069	0.00351509	0.00189173	0.00394175	0.0020667	0.00260612	0.00539452	0.00275832	0.000458284	0.00107682	0.00116378	0.00303466	0.00304189	0.0031147
Yunnan	2020	0.0032446	0.00429966	0.00226596	0.002045	0.00224816	0.00251644	0.00271929	0.0021364	0.00218436	0.00394301	0.00395083	0.00212474	0.00383513	0.00222083	0.00582573	0.0053121	0.00374859	0.00133197	0.00110981	0.00116378	0.00322833	0.00323796	0.00310686
Yunnan	2021	0.00327636	0.00416065	0.00226599	0.00208458	0.00228956	0.0025616	0.0028041	0.00218224	0.00269857	0.00424184	0.00383627	0.00246085	0.00388315	0.00243085	0.00789299	0.00444115	0.0035161	0.00110624	0.0015696	0.00116378	0.00358155	0.00358608	0.00315904
Yunnan	2022	0.00331086	0.0042961	0.00233528	0.00214132	0.0023229	0.0025807	0.00280645	0.00222911	0.00248618	0.0044386	0.00372723	0.00269635	0.00379283	0.00250344	0.00624826	0.00428998	0.00352125	0.00157973	0.00149559	0.00116378	0.0038352	0.00328188	0.00333298
Yunnan	2023	0.00335197	0.00414995	0.00233617	0.00221749	0.00234216	0.00260031	0.00285178	0.00223994	0.0025868	0.00457627	0.00376956	0.00299743	0.00385152	0.00276381	0.00657651	1.03142e-06	0.00170993	0.00132027	0.00185644	0.00116378	0.00397397	0.00349526	0.00329493
Shaanxi	2011	0.0019244	0.00286018	0.00141298	0.0015866	0.00140421	0.002465	0.00345442	0.00304259	0.00252122	0.00126725	0.00260835	0.000300036	0.00347936	0.000177103	0.0017017	0.00161216	0.000443035	0.00108084	0.00117758	0.00303533	0.000385583	0.000246319	0.000524606
Shaanxi	2012	0.00195132	0.00290591	0.00141642	0.00171361	0.00147787	0.00230741	0.00344214	0.00302997	0.00270592	0.00143672	0.00253249	0.000498677	0.00353225	0.000367627	0.00170519	0.00181812	0.000710834	0.00110097	0.00128072	0.00336488	0.000877652	0.00098291	0.00113037
Shaanxi	2013	0.00196575	0.00281323	0.00133493	0.00179145	0.0014296	0.00229806	0.00344109	0.00301079	0.00248414	0.00161638	0.00251536	0.000698805	0.00382766	0.000660113	0.00146424	0.00202656	0.000774105	0.00264729	0.00100837	0.00371307	0.0013071	0.00148912	0.00185485
Shaanxi	2014	0.00196252	0.00274907	0.00135498	0.00186691	0.00140794	0.00235398	0.00344574	0.00300394	0.00251415	0.00174062	0.00235968	0.000907169	0.00375273	0.000695947	0.00220454	0.00215378	0.000861655	0.000132612	0.000971506	0.00406749	0.00184042	0.0014149	0.00213633
Shaanxi	2015	0.00197302	0.00276333	0.00136744	0.00195431	0.00141624	0.00234547	0.00343896	0.00298673	0.00253447	0.00179028	0.00236471	0.00109482	0.00373749	0.000661359	0.00118488	0.00251399	0.000808684	0.000228336	0.000982778	0.0043535	0.00207318	0.00161757	0.00314008
Shaanxi	2016	0.00196947	0.00279185	0.00138516	0.00157829	0.00148761	0.0023401	0.00343674	0.0029797	0.00261561	0.00190964	0.00232825	0.00127029	0.003672	0.000798379	0.00101727	0.00262369	0.00108605	0.00223395	0.00106076	0.00452139	0.00224778	0.00209805	0.00269679
Shaanxi	2017	0.00186933	0.00279898	0.00139934	0.00163189	0.0014036	0.00234449	0.00343346	0.00297713	0.00260235	0.00197329	0.00211561	0.00148556	0.00338991	0.000925713	0.00189027	0.00263384	0.00133104	0.00117786	0.00117316	0.00457735	0.00262704	0.00288017	0.00253233
Shaanxi	2018	0.00188208	0.00279541	0.00141377	0.00168447	0.00144188	0.00235663	0.00345125	0.00297504	0.00279806	0.00208578	0.00198917	0.00172073	0.00337758	0.00138924	0.00278771	0.00302676	0.00135973	0.00215636	0.00119865	0.00460222	0.00299837	0.00289245	0.00303763
Shaanxi	2019	0.00190139	0.00279185	0.00142609	0.00169943	0.00144802	0.00248801	0.00345827	0.00296818	0.00260672	0.00229143	0.0020519	0.0019967	0.00338684	0.00177812	0.00574193	0.00330385	0.00182544	0.00225226	0.00123761	0.004596	0.0032901	0.00323466	0.00317696
Shaanxi	2020	0.00191491	0.0021823	0.00148869	0.00174229	0.00150061	0.00249098	0.00346482	0.00296879	0.0026891	0.00265158	0.00230897	0.00224242	0.00324222	0.00225853	0.00576986	0.00358423	0.00260088	0.0033231	0.00113543	0.004596	0.00351912	0.00347622	0.00322391
Shaanxi	2021	0.00192827	0.00210745	0.00148869	0.00177512	0.00149532	0.00249682	0.0034718	0.00297345	0.0023679	0.00282953	0.00215183	0.00259663	0.00327217	0.00276248	0.00520416	0.00335252	0.00246183	0.00480787	0.00138977	0.00458978	0.00389062	0.00389856	0.00331021
Shaanxi	2022	0.00193906	0.0022429	0.00127637	0.00180751	0.00152842	0.00252849	0.00348638	0.00295496	0.00267358	0.00302942	0.0020899	0.00283458	0.00396547	0.00324951	0.00506099	0.00354059	0.00263987	0.000212344	0.00141408	0.00458356	0.00411421	0.00359434	0.0035277
Shaanxi	2023	0.00195209	0.00213596	0.00130009	0.00184311	0.00155947	0.00253086	0.00348638	0.00291163	0.00269944	0.00311462	0.00208575	0.00315391	0.0039139	0.00383017	0.00543114	9.59265e-07	0.00108605	0.00237583	0.00164671	0.00458356	0.00426999	0.0039112	0.00353488
Gansu	2011	0.00188384	0.00294076	0.00143417	0.0015514	0.00118744	0.00304641	0.00218516	0.00189339	0.00215406	0.000663875	0.00363522	9.59971e-07	0.0033228	0.000185111	0.000510931	0.00114803	0.000296628	9.94034e-05	0.000380509	0.00300424	3.30459e-05	6.47113e-05	0.000556226
Gansu	2012	0.00188623	0.0028557	0.00144115	0.00165964	0.00128541	0.00302272	0.00206425	0.00182421	0.00233622	0.000781943	0.00371539	0.000162898	0.00330851	0.000455224	0.00065061	0.00146047	0.000352542	0.000336124	0.00040634	0.00333379	0.000567222	0.000666006	0.00125219
Gansu	2013	0.0019126	0.00278546	0.00142479	0.00176544	0.00133705	0.00301023	0.00197332	0.00165719	0.00214219	0.000892509	0.00373638	0.000326075	0.00341679	0.000702748	0.000709974	0.00167391	0.000548242	0.000264029	0.000429531	0.00367576	0.0010189	0.00114965	0.00205135
Gansu	2014	0.00193214	0.00271758	0.00144052	0.00186203	0.00136088	0.00299623	0.00197169	0.00154476	0.00189784	0.000962524	0.00354111	0.000496592	0.00341632	0.00083429	0.000741402	0.0017685	0.000707155	0.00039708	0.000437846	0.00406127	0.00157027	0.00107575	0.00233732
Gansu	2015	0.0019471	0.0026672	0.00145223	0.00196773	0.00135594	0.00299468	0.00194866	0.00146279	0.00234008	0.00103409	0.0037801	0.000660171	0.00341693	0.000952192	0.000786798	0.00240039	0.000843262	0.000310613	0.000463532	0.00445299	0.00180196	0.00126784	0.0034897
Gansu	2016	0.00195862	0.00260442	0.00146531	0.00137486	0.00131129	0.00301648	0.00215112	0.00133976	0.0020982	0.00107283	0.00367276	0.000789285	0.0034058	0.00104749	0.00082521	0.00235718	0.00103602	0.000488404	0.000465195	0.00471414	0.00201265	0.00177486	0.00247327
Gansu	2017	0.00172274	0.00254404	0.00148218	0.00146192	0.00129733	0.00305973	0.00255726	0.00158789	0.0025135	0.000921539	0.00309072	0.000942843	0.00282754	0.00115061	0.000853146	0.00251502	0.0018041	0.000499136	0.000480298	0.00493798	0.0024219	0.00249925	0.00242312
Gansu	2018	0.00173286	0.00249828	0.00148958	0.00152584	0.00135209	0.00306613	0.00276421	0.00170615	0.00251998	0.000990628	0.00299455	0.0011234	0.00283207	0.00143998	0.000716958	0.00327573	0.00211972	0.000581091	0.000510051	0.00517425	0.0027861	0.0023616	0.00285157
Gansu	2019	0.00176013	0.00244783	0.00147906	0.00157989	0.00136557	0.00307722	0.0027852	0.00180386	0.00295013	0.00114875	0.00323379	0.00132794	0.00291952	0.00209665	0.00107314	0.00346116	0.00230659	0.000240251	0.000534249	0.00523021	0.00306561	0.00262072	0.00290564
Gansu	2020	0.00180725	0.00205754	0.00149086	0.00166757	0.00141323	0.00307975	0.00282205	0.00179624	0.00278815	0.00129843	0.00357192	0.00150535	0.00299543	0.00240546	0.00121631	0.00374636	0.00304083	0.000808536	0.000572014	0.00524265	0.00329718	0.00276622	0.00293995
Gansu	2021	0.00183833	0.00199695	0.00149087	0.00173993	0.0014485	0.00309575	0.00309866	0.00160371	0.00267744	0.00153118	0.00358143	0.00177528	0.00306497	0.00287355	0.00133504	0.00355909	0.00247801	0.00143091	0.00101757	0.00524265	0.00367839	0.00322922	0.00312257
Gansu	2022	0.00186842	0.00211814	0.00150406	0.00183998	0.00148882	0.0030954	0.00312375	0.00152492	0.00272122	0.00169831	0.00363729	0.0019569	0.00309784	0.003132	0.001789	0.00362896	0.00242504	0.000523927	0.000970579	0.00524265	0.00385785	0.00293836	0.00327858
Gansu	2023	0.00190492	0.0020219	0.00159402	0.00193259	0.00149833	0.0030979	0.00314641	0.00141659	0.00280326	0.00186941	0.00372108	0.00219642	0.00295369	0.00337692	0.0019182	9.63186e-07	0.000932283	0.000955703	0.00121986	0.00523021	0.00400419	0.00328834	0.00329529
Qinghai	2011	0.000216554	0.000363726	0.000173423	0.000256601	9.07311e-05	0.00342893	0.00369047	0.00339475	0.00286863	8.52292e-07	0.00247903	0.000131899	0.00192397	6.26204e-05	0.00024554	0.000506287	1.60804e-06	6.83524e-05	1.85422e-06	0.000765836	4.9903e-07	5.38977e-07	0.000701743
Qinghai	2012	0.0002196	0.000339737	0.000173423	0.000259862	8.8685e-05	0.00342394	0.00369477	0.00339558	0.00296375	2.37461e-05	0.00249514	0.000327315	0.00196024	8.70016e-05	0.000196652	0.000649032	1.26437e-05	8.9227e-05	5.44459e-06	0.000865321	0.000485587	0.000482794	0.000970391
Qinghai	2013	0.000220335	0.000345119	9.49107e-05	0.000241334	8.95275e-05	0.00342152	0.00369042	0.0033832	0.00295188	5.59229e-05	0.00261514	0.000542571	0.00304676	0.000133336	0.000214112	0.000771595	4.57507e-05	6.56896e-05	5.81878e-06	0.000983459	0.000926634	0.00114131	0.00177535
Qinghai	2014	0.00021936	0.000343693	8.95763e-05	0.000264348	9.24161e-05	0.00342181	0.00369294	0.00337698	0.0029529	6.78329e-05	0.00250385	0.000746103	0.00313174	0.00015309	0.00021062	0.000918126	7.66506e-05	5.59357e-05	1.00688e-05	0.00115756	0.0014751	0.00108762	0.00186858
Qinghai	2015	0.000221564	0.000339737	0.000107144	0.000274194	9.14532e-05	0.00341992	0.00369135	0.00337339	0.00291597	6.21333e-05	0.00230441	0.000907467	0.0028509	0.000238793	0.00014078	0.000987501	0.00015905	6.67206e-05	1.88461e-05	0.00133787	0.00169369	0.00138816	0.00336305
Qinghai	2016	0.000222945	0.000339986	0.000113643	0.000277754	9.24161e-05	0.00342656	0.00369173	0.00336725	0.00297847	7.56665e-05	0.00229193	0.00108874	0.00276557	0.000331411	0.000179192	0.0011224	8.91577e-05	5.37092e-05	1.91233e-05	0.00154306	0.00188855	0.00187763	0.00245584
Qinghai	2017	0.000220119	0.000338667	0.000118807	0.00028063	8.96479e-05	0.00342699	0.00369319	0.00336214	0.00287817	9.31956e-05	0.00242419	0.00128662	0.00264405	0.00040003	0.000137288	0.00112611	0.000266464	6.33924e-05	2.35147e-05	0.00171716	0.00229612	0.00261378	0.00240124
Qinghai	2018	0.00022103	0.000322092	0.000127813	0.000288024	9.037e-05	0.00342869	0.00369525	0.00263472	0.00303877	0.000122182	0.00249901	0.00151751	0.00252542	0.000628893	0.000186176	0.00129381	0.000295893	0.000130919	2.47731e-05	0.00182286	0.00268298	0.002445	0.00280985
Qinghai	2019	0.00022103	0.000322092	0.000127813	0.000288024	9.037e-05	0.00342869	0.00369525	0.00263472	0.00303877	0.000122182	0.00249901	0.00151751	0.00252542	0.00100337	0.000186176	0.00129381	0.000426849	3.1954e-06	2.47731e-05	0.001941	0.00291078	0.00263145	0.00295491
Qinghai	2020	0.00022769	0.000182574	0.000134124	0.000302691	9.55454e-05	0.00344259	0.00370774	0.00337338	0.00304525	0.000192278	0.00298057	0.00200087	0.00252935	0.00117108	0.000381728	0.00135149	0.000621813	8.91857e-06	3.35347e-05	0.00213375	0.00311665	0.00275895	0.00303984
Qinghai	2021	0.00023354	0.000175445	0.000134067	0.000304138	9.75915e-05	0.00344532	0.00371145	0.00337575	0.0030438	0.000207124	0.0028216	0.00231377	0.00261009	0.00124835	0.00031538	0.00121269	0.000395949	0.000136718	9.79998e-05	0.00224567	0.00347599	0.00314034	0.0031909
Qinghai	2022	0.000234632	0.000186139	0.000137478	0.000311691	9.54251e-05	0.00344618	0.00371302	0.00337748	0.00300891	0.000233234	0.00281959	0.00252507	0.00257729	0.00136437	0.000133797	0.00132895	0.000459956	6.87702e-05	9.869e-05	0.00224567	0.0036404	0.00271511	0.00336146
Qinghai	2023	0.000240559	0.00017901	0.000137582	0.000322739	0.000106137	0.003447	0.00371302	0.00336664	0.0030467	0.000239737	0.00272544	0.00281218	0.00265579	0.00163281	0.00028046	7.26007e-07	0.000151693	0.000118206	0.000125005	0.0022208	0.00382019	0.00316093	0.00335719
Ningxia	2011	0.000551541	0.000513367	0.000447256	0.000513192	0.000398368	0.00328376	0.00367467	0.00328816	0.00275997	8.66709e-05	0.00233589	0.000410888	0.0025755	5.97475e-05	0.000346808	0.000542256	3.47151e-05	5.4261e-05	7.51964e-05	1.04708e-06	0.000326075	0.000175943	0.000289457
Ningxia	2012	0.000542512	0.000483781	0.000463934	0.000527273	0.000417625	0.00327795	0.00367358	0.00328775	0.00288699	0.000107781	0.00226966	0.00062044	0.00241638	0.000170798	0.000392203	0.000675551	7.22363e-05	9.35618e-05	8.20491e-05	1.04708e-06	0.00080418	0.000894459	0.000881822
Ningxia	2013	0.000553544	0.000454552	0.000472673	0.000538431	0.0004157	0.0032731	0.00367451	0.00327318	0.00285712	0.000138855	0.00230626	0.000824536	0.00243123	0.000287505	0.000451567	0.00072183	0.000147279	0.000121301	9.21135e-05	1.34827e-05	0.00121558	0.00130816	0.00175493
Ningxia	2014	0.000548143	0.000408925	0.000473097	0.000546811	0.000421116	0.00327684	0.00367707	0.00328776	0.00275734	0.000149576	0.00209712	0.00102566	0.00239629	0.000367144	0.000538867	0.000758827	0.000129622	2.43129e-06	8.95265e-05	1.97005e-05	0.00177521	0.00115051	0.00199375
Ningxia	2015	0.000553536	0.000376844	0.000482334	0.000560657	0.000414737	0.00327481	0.00367691	0.00328385	0.00291721	0.000175593	0.0021738	0.00120141	0.00237498	0.00039211	0.000654102	0.000803359	0.000149486	6.62823e-05	9.16515e-05	1.97005e-05	0.0020241	0.00137072	0.00353496
Ningxia	2016	0.000558521	0.000348684	0.000492782	0.000370344	0.00041245	0.00327175	0.00367705	0.00328932	0.00279223	0.000182926	0.00202624	0.00138317	0.00234514	0.000477838	0.000573787	0.000972438	0.00030325	6.07435e-05	9.507e-05	1.97005e-05	0.00219131	0.00184933	0.00233336
Ningxia	2017	0.000491486	0.000308404	0.000488297	0.000389199	0.000411728	0.00327136	0.00367811	0.00328986	0.00294955	0.000199424	0.00193156	0.00160295	0.00197771	0.000656299	0.000458551	0.0010743	0.000509985	0.000223699	9.93931e-05	1.97005e-05	0.00258336	0.0026257	0.00243243
Ningxia	2018	0.0005065	0.000279887	0.000502838	0.000401724	0.000438809	0.00328311	0.00368432	0.00329108	0.00296871	0.000239858	0.00200662	0.00184344	0.00199216	0.000861735	0.000472519	0.00105824	0.00067552	0.000181714	0.000103314	1.97005e-05	0.00292533	0.00233764	0.00284013
Ningxia	2019	0.000501043	0.00025244	0.000520824	0.000409522	0.000415459	0.0032828	0.0036848	0.00328431	0.00305538	0.000246144	0.00198339	0.00212882	0.00187543	0.00102875	0.00134552	0.00105387	0.000829283	0.000283784	0.000113138	1.97005e-05	0.00319163	0.00251168	0.00289904
Ningxia	2020	0.000511039	0.000225349	0.00053809	0.000418582	0.000424245	0.00328465	0.00368641	0.00327577	0.00294911	0.000328057	0.00229826	0.00238449	0.00185187	0.00103795	0.0014852	0.00122427	0.00109046	0.000227983	0.000119903	1.97005e-05	0.00342158	0.00273816	0.00289224
Ningxia	2021	0.000511831	0.00021822	0.000538053	0.00042597	0.000409682	0.00328756	0.00368573	0.00325876	0.00280272	0.000367365	0.00214502	0.00274339	0.00185633	0.00111475	0.00170868	0.00117079	0.00113019	0.000404264	0.000339588	1.97005e-05	0.00379566	0.00319343	0.00306289
Ningxia	2022	0.000518214	0.00026456	0.000547838	0.000433263	0.000418588	0.00329037	0.00369035	0.00322581	0.00302661	0.000427032	0.00213904	0.00301462	0.00184728	0.00142606	0.000954413	0.00118289	0.00126041	0.000457738	0.000272336	1.97005e-05	0.00411001	0.00290399	0.00326333
Ningxia	2023	0.00052273	0.000228914	0.000551992	0.00044066	0.000422199	0.00329132	0.00369035	0.00314997	0.00295743	0.000454593	0.00214353	0.00334734	0.00185311	0.0017321	0.00075537	7.27532e-07	0.000429056	0.000530858	0.000442836	1.97005e-05	0.00427777	0.00324867	0.00321418
Xinjiang	2011	0.00230158	0.00207169	0.00457678	0.00129348	0.00144031	0.00257927	0.00329736	0.00147101	0.00258254	0.00119574	0.00464831	0.000391545	0.000665794	0.00191112	0.00244549	0.00143738	0.000348864	6.90719e-05	0.000626229	0.000349244	0.000118226	0.000180649	0.000256448
Xinjiang	2012	0.00236759	0.00209369	0.00475193	0.00142422	0.0017926	0.00253558	0.00328584	0.00141923	0.00225661	0.00141765	0.00474748	0.000645239	0.000650083	0.00241923	0.00428228	0.00176474	0.000435678	0.000304271	0.000664653	0.000392768	0.00063339	0.000838843	0.0011539
Xinjiang	2013	0.00240913	0.00200336	0.00564986	0.0015737	0.00162362	0.00248461	0.00325328	0.00121437	0.00266521	0.00160001	0.00469119	0.000886038	0.000398038	0.00331693	0.00382483	0.00187106	0.000643884	0.000524087	0.000739601	0.000405204	0.00106907	0.00149394	0.00219744
Xinjiang	2014	0.00255267	0.00197591	0.00572501	0.00170722	0.00166875	0.00232109	0.00304581	0.000604921	0.00173017	0.00174214	0.00447354	0.00110348	0.000467286	0.00401982	0.00284707	0.00230489	0.000667427	0.000180027	0.000856015	0.000430075	0.00160442	0.00137072	0.00203755
Xinjiang	2015	0.0026653	0.0019597	0.00586201	0.00181923	0.00224744	0.00226726	0.00315009	0.000540136	0.00237737	0.00178399	0.00450855	0.00127739	0.000498768	0.00443009	0.0017017	0.00292322	0.000969804	0.000323814	0.000925772	0.000454946	0.0018271	0.00151757	0.00336518
Xinjiang	2016	0.00271713	0.00197509	0.00590699	0.00186692	0.00183461	0.00225701	0.00311024	0.00056942	0.00248808	0.00189851	0.00460915	0.00146539	0.000517723	0.00456863	0.00188328	0.00346242	0.00109414	0.000316439	0.00096356	0.000467382	0.00202381	0.00196154	0.00241663
Xinjiang	2017	0.00272627	0.00187796	0.00587095	0.00193273	0.00175325	0.00225444	0.00310857	0.000716237	0.00286718	0.00214579	0.00383739	0.00167919	0.00053321	0.00504942	0.00302167	0.00295774	0.00107354	0.000397569	0.000991027	0.0004736	0.00243731	0.00259245	0.00250042
Xinjiang	2018	0.00281178	0.00185301	0.00578752	0.00200328	0.00177672	0.00223385	0.00319782	0.000529974	0.00253323	0.0023614	0.00373094	0.00190962	0.000609262	0.00614077	0.00454767	0.00363732	0.000874898	0.000347265	0.00106875	0.000479817	0.00285121	0.00241959	0.00285836
Xinjiang	2019	0.00285931	0.00167314	0.00588016	0.00204669	0.00180428	0.00222042	0.00321559	0.000607565	0.00265953	0.00250888	0.00352167	0.0021941	0.000611	0.00847023	0.00488639	0.00471962	0.0010728	0.000273824	0.00111753	0.000479817	0.0031319	0.00266956	0.00293133
Xinjiang	2020	0.00291102	0.0015692	0.00579951	0.00215331	0.00187204	0.00226661	0.00324108	0.000640098	0.00261189	0.00283103	0.0038644	0.00242582	0.00066648	0.00997799	0.00390165	0.00544608	0.00192917	0.000365869	0.00114229	0.000479817	0.00331166	0.00285721	0.00291974
Xinjiang	2021	0.00296151	0.00155137	0.00579957	0.00220374	0.00205547	0.00230314	0.00327361	0.000620544	0.00257256	0.00340439	0.00396841	0.00280258	0.00069737	0.00892082	0.00442196	0.0041023	0.00180042	0.000319	0.00245809	0.0004736	0.0036952	0.00327794	0.0030432
Xinjiang	2022	0.0030112	0.00164405	0.00778893	0.00226407	0.00214899	0.00228863	0.0032824	0.000430727	0.00290381	0.0036302	0.0038055	0.00304428	0.000258485	0.00949091	0.00312643	0.00458771	0.00184089	0.000350118	0.00198502	0.0004736	0.00389426	0.00280201	0.00324846
Xinjiang	2023	0.00317417	0.00151929	0.00790398	0.00234431	0.00251692	0.00226936	0.00330506	6.23838e-05	0.00277579	0.0037544	0.0038584	0.00339099	0.000312094	0.0102157	0.00311944	1.23089e-06	0.000933019	0.000881191	0.00285705	0.000461164	0.00407869	0.00312558	0.00324336
K	-0.167612
ej		0.954109	0.951876	0.942943	0.940546	0.937045	0.992205	0.988094	0.991229	0.995488	0.950771	0.970948	0.966536	0.977628	0.932074	0.94093	0.965608	0.928246	0.878618	0.889646	0.915009	0.976713	0.980095	0.984482
gj		0.045891	0.0481237	0.0570572	0.0594539	0.0629549	0.0077951	0.0119064	0.00877098	0.0045125	0.0492294	0.0290519	0.0334642	0.0223718	0.0679256	0.0590701	0.0343916	0.0717541	0.121382	0.110354	0.0849906	0.0232865	0.0199052	0.0155181
W(weight )		0.0463335	0.0485876	0.0576073	0.0600271	0.0635618	0.00787025	0.0120212	0.00885553	0.004556	0.049704	0.029332	0.0337868	0.0225875	0.0685805	0.0596396	0.0347231	0.0724459	0.122552	0.111418	0.08581	0.396638	0.339044	0.264318
Scores for each indicator
Beijing	2011	0.000651746	0.000844182	0.000884267	0.000775189	0.000754091	0.00776737	0.0118057	0.00863121	0.00449586	0.00053465	0.000718304	0.00826035	0.00286548	0.00277685	0.00121057	0.00478522	0.00815377	0.000471604	0.00229455	0.00738862	0.0815934	0.0440478	0.0140856
Beijing	2012	0.000591255	0.0008058	0.000868453	0.000666095	0.000689223	0.00776925	0.0118099	0.00865152	0.00447957	0.000666275	0.0007201	0.00967693	0.00248975	0.00333146	0.00143755	0.0056883	0.00910173	0.00379094	0.00240066	0.00774532	0.131137	0.102709	0.0624531
Beijing	2013	0.000468658	0.000785389	0.000386769	0.000514975	0.000545703	0.00777909	0.011811	0.00865698	0.00452736	0.000771613	0.000694327	0.0111921	0.00349282	0.00363958	0.000359388	0.00760226	0.0115943	0.0269768	0.00246827	0.00774532	0.163836	0.161968	0.125024
Beijing	2014	0.000327514	0.000718831	0.000299215	0.000460829	0.000284609	0.00779171	0.0118301	0.00869803	0.00449888	0.000764681	0.000612948	0.0127338	0.00252623	0.00291793	0.000605286	0.00877857	0.0120815	0.0153445	0.00258098	0.00794914	0.206575	0.143393	0.128206
Beijing	2015	0.000259383	0.00067224	0.000248325	0.000416869	0.000274068	0.007804	0.0118616	0.00871219	0.00454969	0.000555256	0.00045895	0.0142188	0.00205038	0.00374798	0.000302643	0.0108505	0.0140537	0.0344661	0.0026426	0.00810201	0.227466	0.153	0.209453
Beijing	2016	0.000191273	0.00065671	0.00016987	0.000228536	0.000194604	0.00781368	0.0118721	0.00872731	0.00451895	0.000433335	0.000341757	0.0157382	0.00165919	0.00392472	0.000302643	0.01133	0.0154623	0.029183	0.00281137	0.00815296	0.242201	0.172893	0.181528
Beijing	2017	9.86282e-05	0.000630086	5.5095e-05	0.000179008	9.97346e-05	0.00782589	0.0118945	0.00875257	0.00454915	0.000313143	0.000256026	0.0174236	0.00106832	0.00418653	0.000453964	0.0132407	0.0174245	0.0430292	0.00318877	0.00815296	0.268214	0.235799	0.179344
Beijing	2018	4.64045e-05	0.000563528	3.79021e-06	0.00014344	4.29751e-05	0.00783978	0.0119057	0.00877319	0.00455131	0.000266482	0.000212604	0.0193873	0.000612822	0.00512519	0.000170237	0.0147145	0.0175439	0.0928989	0.00339026	0.00815296	0.300443	0.24222	0.232381
Beijing	2019	0	0.000496969	0	0.000130712	0	0.00785218	0.0119289	0.00878857	0.00455368	0.00020561	0.000133372	0.0215153	0	0.00538673	0.000151321	0.0149337	0.0194166	0.000984678	0.00353628	0.00815296	0.326729	0.265962	0.244003
Beijing	2020	2.93336e-05	0.000472565	9.45344e-07	0.000118841	1.37845e-05	0.0078534	0.0119368	0.00879244	0.00455422	0.000131779	0.000106956	0.0225603	0.000394015	0.00659263	0.000945759	0.0127038	0.0223997	0.0206207	0.00362386	0.00815296	0.337269	0.295406	0.241298
Beijing	2021	8.92125e-05	0.000155303	1.38709e-06	0.000123483	7.29766e-05	0.0078508	0.0119233	0.0088034	0.0045402	0.000156352	8.24302e-05	0.0253333	0.00120341	0.00870274	0.000907928	0.0127175	0.0199635	0.0166229	0.00348705	0.00810201	0.36794	0.314557	0.240356
Beijing	2022	0.000168283	0.000110931	2.55508e-05	0.00012302	0.000134601	0.00784736	0.0119478	0.00880832	0.00454645	0.000150945	7.28951e-05	0.0265999	0.00212995	0.0101284	0.000151321	0.0118215	0.0169406	0.0473552	0.00313988	0.00805105	0.387577	0.295248	0.252422
Beijing	2023	0.000214462	8.87445e-05	7.7368e-05	0.000135702	0.000154062	0.0078458	0.0119478	0.00880832	0.00454014	8.80096e-05	4.2493e-05	0.0288728	0.00242229	0.011982	0.000226982	9.92615e-07	0.00675503	0.0390919	0.0038268	0.00805105	0.396411	0.3043	0.256625
Tianjin	2011	0.00115541	0.000998376	0.00202107	0.0022179	0.00107843	0.00765068	0.011816	0.00865099	0.00454764	0.000479485	0.00136771	0.0066884	0.00259056	0.000245613	0.00155104	0.00234417	0.00266158	0.00504701	0.00262188	0.00025478	0.0575517	0.031332	0.0209172
Tianjin	2012	0.00118887	0.000909631	0.00201258	0.00214664	0.00109303	0.00765002	0.0118151	0.0086557	0.00441226	0.000585102	0.00127531	0.0081303	0.00275553	0.000490208	0.00109708	0.00257909	0.00334769	0.0056784	0.00263957	0.000305736	0.0927605	0.0867971	0.0748265
Tianjin	2013	0.00117225	0.000798701	0.0017637	0.00208349	0.00118303	0.00765124	0.0118275	0.00864158	0.00454796	0.000733557	0.00124591	0.00966646	0.00326073	0.000978179	0.000662031	0.00314239	0.00487237	0.00866803	0.00361694	0.000305736	0.123436	0.128342	0.125081
Tianjin	2014	0.00118905	0.000798701	0.0017637	0.00207511	0.00119357	0.00766307	0.0118273	0.00865929	0.00454527	0.000852144	0.00120766	0.0111164	0.00334133	0.00119098	0.000472879	0.00344588	0.00528006	0.00944007	0.00582766	0.000305736	0.163836	0.116743	0.140535
Tianjin	2015	0.00115859	0.000732142	0.00176371	0.00205062	0.00126249	0.00767956	0.0118356	0.00870795	0.00454214	0.000956084	0.00119814	0.0123972	0.00319514	0.00159523	0.000264812	0.00398669	0.00695059	0.0105379	0.00546124	0.000356692	0.179229	0.126956	0.220233
Tianjin	2016	0.00118948	0.00068777	0.00174382	0.00170234	0.00139142	0.00768422	0.0118519	0.00867709	0.00453049	0.0010652	0.00116266	0.0137885	0.00339479	0.00184098	0.00058637	0.00411288	0.00909841	0.0048865	0.00489218	0.000356692	0.190773	0.151281	0.186738
Tianjin	2017	0.00106874	0.000621212	0.00174382	0.00167816	0.00148791	0.00772125	0.0119219	0.00869795	0.00454214	0.000611131	0.000800195	0.0152531	0.00281115	0.00246006	0.000416134	0.00404502	0.00946633	0.0168638	0.00201247	0.000356692	0.218513	0.204107	0.177591
Tianjin	2018	0.00103754	0.000554653	0.00172651	0.00114997	0.00146683	0.007733	0.0119338	0.00874983	0.00454084	0.000645214	0.000808481	0.0163978	0.002701	0.00323181	0.000680946	0.0042326	0.0111236	0.02201	0.00182341	0.000356692	0.250481	0.209359	0.213184
Tianjin	2019	0.000979677	0.000510281	0.00172773	0.00120365	0.0015771	0.00774084	0.0119352	0.00877735	0.00454214	0.000741599	0.00125543	0.0179156	0.00241673	0.00332238	0.00128623	0.00412547	0.0110639	0.00711112	0.00195224	0.000356692	0.274821	0.230266	0.222199
Tianjin	2020	0.00100678	0.000354978	0.00167757	0.0012274	0.00161684	0.00775137	0.011948	0.0087936	0.00453804	0.000992473	0.001458	0.0186893	0.00266632	0.00398709	0.00105925	0.0039545	0.0127477	0.010921	0.00205086	0.000356692	0.288851	0.247014	0.225931
Tianjin	2021	0.00106108	0.000310606	0.00167738	0.0012609	0.00179279	0.00774727	0.0119667	0.00880439	0.00454991	0.00112507	0.00139438	0.0206653	0.00293583	0.00413494	0.000718777	0.00378052	0.00916139	0.0177913	0.0032183	0.000356692	0.324244	0.267635	0.235609
Tianjin	2022	0.0010809	0.00028842	0.0016321	0.00125313	0.00184387	0.00774876	0.0119478	0.00880832	0.00455131	0.00117427	0.00166382	0.0215933	0.00315073	0.00428537	0.000264812	0.00281719	0.00735828	0.0178355	0.00268718	0.000356692	0.345985	0.249716	0.255383
Tianjin	2023	0.00111009	0.000266234	0.00176485	0.00124422	0.00183982	0.0077497	0.0119478	0.00883657	0.00452806	0.00113332	0.00158452	0.0231934	0.00295966	0.00489632	0.00107817	0	0.00292011	0.0120412	0.00371021	0.000305736	0.359928	0.262309	0.259573
Hebei	2011	0.0264473	0.0325027	0.0396458	0.046428	0.0254915	0.00431159	0.00600324	0.00550838	0.00306412	0.0188497	0.0131779	0.00253903	0.00495634	0.00501177	0.0306804	0.00935158	0.00201193	0.00350659	0.0308204	0.0293507	0.014087	0.0251827	0.0279177
Hebei	2012	0.0264719	0.0310162	0.0397029	0.0473543	0.0276808	0.00427783	0.00586932	0.0054192	0.0031227	0.0206447	0.0133348	0.00338653	0.00495219	0.00857447	0.0288456	0.0113319	0.00250248	0.00759061	0.0327482	0.0322552	0.0542135	0.0682146	0.0711432
Hebei	2013	0.0263727	0.0300622	0.0374584	0.0483001	0.0270516	0.00425892	0.00573069	0.00516306	0.00336273	0.0226361	0.0136919	0.00428554	0.00542137	0.0112652	0.0201447	0.0130558	0.00339409	0.00640439	0.0339935	0.034752	0.0885344	0.105016	0.132222
Hebei	2014	0.0262627	0.0292413	0.0379461	0.0491157	0.0270127	0.00420837	0.00575939	0.00510903	0.0030076	0.02329	0.0130253	0.00515673	0.00527054	0.0119929	0.0157563	0.0149055	0.0041034	0.00562086	0.0348241	0.0375546	0.126364	0.0838167	0.136452
Hebei	2015	0.0263442	0.0282208	0.0383327	0.0498398	0.0289749	0.00420968	0.00597961	0.00510719	0.0026159	0.0232257	0.0128237	0.00591117	0.00520986	0.014784	0.016948	0.0182	0.00573747	0.0112476	0.0337409	0.03944	0.145838	0.0973465	0.207043
Hebei	2016	0.0262735	0.025869	0.038418	0.0330852	0.030441	0.00425065	0.00609974	0.00509445	0.00299519	0.0236499	0.0120903	0.00666951	0.00516714	0.0153612	0.0167588	0.0204556	0.00674509	0.000195598	0.033128	0.0404591	0.161863	0.127908	0.176777
Hebei	2017	0.0252534	0.0236504	0.0385685	0.0338938	0.0308156	0.00435896	0.00639827	0.00538645	0.00378183	0.0207791	0.0101789	0.0075088	0.00479567	0.0173159	0.0145458	0.0199989	0.0100762	0.00166255	0.0339261	0.0408158	0.197159	0.179428	0.172499
Hebei	2018	0.0246916	0.0213431	0.0387245	0.0344625	0.0297753	0.00446514	0.0075851	0.00590262	0.00395551	0.0221272	0.010256	0.0085125	0.00457705	0.0206997	0.0133352	0.0231499	0.01235	0.0116313	0.0278192	0.0408667	0.223771	0.17571	0.204987
Hebei	2019	0.0244953	0.0203669	0.0386347	0.0350262	0.0300858	0.00463246	0.00788642	0.00608973	0.00421689	0.0235594	0.011108	0.00968398	0.00453085	0.0246078	0.008474	0.0249892	0.0167981	0.00660909	0.02762	0.0409177	0.241124	0.195494	0.213904
Hebei	2020	0.0243636	0.017638	0.0385275	0.0356375	0.0305456	0.00476034	0.00811061	0.00607473	0.00415616	0.0263112	0.0118929	0.0106388	0.00450941	0.0333655	0.0104412	0.0252567	0.0220516	0.0162679	0.0280769	0.0409686	0.25795	0.20968	0.216459
Hebei	2021	0.0243873	0.0167949	0.0385272	0.0362309	0.0307823	0.00485812	0.00822787	0.00612285	0.00413674	0.0274272	0.0110576	0.012133	0.0045173	0.0349154	0.00917386	0.0236232	0.0180344	0.014954	0.0262054	0.0409177	0.284923	0.232915	0.224864
Hebei	2022	0.0244384	0.0177489	0.0352835	0.0369202	0.0311067	0.00491598	0.00835197	0.00615221	0.00441042	0.0300485	0.0115449	0.0131675	0.00526737	0.0432839	0.00624201	0.0222783	0.0171395	0.0245695	0.025937	0.0409177	0.303926	0.211735	0.243987
Hebei	2023	0.0243904	0.0170611	0.0354527	0.0376205	0.0306591	0.0049736	0.00842535	0.00612395	0.00386189	0.0304666	0.0112671	0.0143229	0.00520866	0.0491649	0.010025	2.04756e-06	0.00685115	0.046404	0.0328571	0.0409686	0.318743	0.22626	0.242887
Shanxi	2011	0.0112939	0.010849	0.0106957	0.0128272	0.00943992	0.00665327	0.0100118	0.00783259	0.00346143	0.00394668	0.00622675	0.00169938	0.00932716	0.00161394	0.00913603	0.00616744	0.00107391	2.04175e-05	0.00458175	0.0338348	0.0230343	0.00999099	0.0349127
Shanxi	2012	0.0113266	0.0110265	0.0106887	0.0134103	0.0103838	0.0066122	0.00990697	0.00771016	0.00355205	0.00433735	0.00629157	0.00243167	0.00937167	0.00250487	0.00993047	0.00790902	0.00139874	0.00116316	0.00504551	0.0390833	0.062529	0.0536351	0.0878139
Shanxi	2013	0.0112483	0.011448	0.0112518	0.0139862	0.0104113	0.00658189	0.00985384	0.00769504	0.00283855	0.00491415	0.00668138	0.00320411	0.00868721	0.00306104	0.0101953	0.00867686	0.00159098	0.00100493	0.00531356	0.0455037	0.09685	0.0890241	0.135827
Shanxi	2014	0.0112513	0.0102944	0.011476	0.014452	0.0105573	0.00659744	0.00981752	0.00763903	0.00329045	0.00525143	0.00676294	0.00395512	0.00846791	0.00374595	0.011141	0.00837458	0.00213456	0.00262757	0.00516367	0.0512108	0.137625	0.0794031	0.142405
Shanxi	2015	0.0112035	0.00993939	0.0119364	0.0147483	0.0104211	0.00660924	0.00981708	0.00765364	0.00332378	0.00521975	0.00670942	0.00451763	0.00798662	0.00369429	0.0120111	0.010076	0.00215777	0.00168672	0.00514979	0.0575803	0.157245	0.0906657	0.215699
Shanxi	2016	0.0110606	0.00996157	0.012175	0.00747128	0.0109586	0.00662556	0.00985267	0.00762375	0.004013	0.00526576	0.00657249	0.00506623	0.00763278	0.00416918	0.0137702	0.0110355	0.00316539	0.00223853	0.00518809	0.0642046	0.173778	0.122864	0.194516
Shanxi	2017	0.0106246	0.00971753	0.0123864	0.00580543	0.0107543	0.00668167	0.00997881	0.00759334	0.00367039	0.0047999	0.00500887	0.00568161	0.00702641	0.00513088	0.0134298	0.0122076	0.00480277	0.00236006	0.00528495	0.070676	0.205809	0.167	0.178726
Shanxi	2018	0.0105562	0.00925162	0.0124524	0.00609875	0.0109595	0.00670808	0.0101467	0.00761965	0.00366014	0.00496926	0.0047516	0.00652171	0.00690713	0.00624146	0.0132595	0.0148497	0.00529664	0.00370396	0.00540439	0.0751601	0.234842	0.163469	0.202534
Shanxi	2019	0.0104626	0.00898538	0.0124582	0.006445	0.0108086	0.00672138	0.0102365	0.00763412	0.0029666	0.0056396	0.0052492	0.0075275	0.0068112	0.00764551	0.0101953	0.0159918	0.00609213	0.00394506	0.00559782	0.078829	0.259243	0.182415	0.206967
Shanxi	2020	0.0105147	0.0092738	0.0124409	0.00679672	0.0113154	0.00673242	0.0102698	0.00763307	0.00344525	0.00688935	0.00583671	0.00837906	0.00687557	0.0103796	0.00906037	0.0166977	0.00735828	0.00444148	0.00583814	0.083415	0.27775	0.191481	0.211456
Shanxi	2021	0.0106561	0.00845292	0.0124411	0.00706378	0.0112903	0.00675198	0.0103631	0.00765291	0.00330178	0.00769011	0.0062142	0.00962744	0.00701356	0.0138564	0.010025	0.0131355	0.00578387	0.0023017	0.00845863	0.0850456	0.308778	0.218636	0.219648
Shanxi	2022	0.010728	0.00874134	0.0123051	0.00733551	0.0116398	0.00677596	0.0104067	0.00762154	0.00415486	0.00800354	0.00568309	0.0105128	0.00719392	0.0161684	0.00714994	0.0147356	0.00494198	0.00993114	0.00844353	0.08581	0.330192	0.193382	0.233353
Shanxi	2023	0.0108198	0.00840854	0.0122069	0.00773967	0.0117517	0.00677878	0.0104801	0.00750852	0.00408132	0.00832724	0.00588379	0.0116949	0.00736602	0.0180818	0.00750933	1.36419e-06	0.00210142	0.013871	0.0105445	0.0841794	0.342887	0.216644	0.232932
Inner Mongolia	2011	0.0213808	0.0146029	0.0261794	0.0139382	0.0191255	0.00596339	0.0102985	0.00729207	0.00235937	0.00797492	0.0100606	0.00232519	0.00678603	0.011382	0.0137324	0.010005	0.00120981	0.00128458	0.00267753	0.00229302	0.0193717	0.0158174	0.018456
Inner Mongolia	2012	0.021515	0.0141059	0.0266463	0.0144265	0.0219822	0.00582959	0.00989861	0.0070498	0.00233337	0.00896419	0.0100887	0.00321022	0.00667305	0.0128767	0.0170237	0.0115161	0.00130261	0.00235634	0.00283606	0.0025478	0.0623839	0.0596634	0.0744548
Inner Mongolia	2013	0.0216892	0.0135912	0.0251666	0.0151056	0.0222514	0.0056815	0.00979528	0.00672237	0.00268677	0.009975	0.0104654	0.00410835	0.00734536	0.0187311	0.0130893	0.0119184	0.0016175	0.00369439	0.00308064	0.00275163	0.0976782	0.0888626	0.142416
Inner Mongolia	2014	0.0221301	0.0130765	0.0256448	0.01602	0.0220892	0.00545759	0.00982882	0.00647973	0.00253013	0.0102995	0.0101327	0.00497358	0.00736459	0.0202126	0.015605	0.013224	0.00204176	0.00376083	0.00327828	0.00285354	0.139589	0.0727425	0.165164
Inner Mongolia	2015	0.0227755	0.0125196	0.0263076	0.0168013	0.0264645	0.00538368	0.00967574	0.00632115	0.00164285	0.0101853	0.0100309	0.00567148	0.00740657	0.0211111	0.0137702	0.0172572	0.00240967	0.00254362	0.00378571	0.00285354	0.156562	0.0869788	0.251231
Inner Mongolia	2016	0.0238535	0.0118895	0.0267019	0.0146553	0.026227	0.00532514	0.00972138	0.00630391	0.00064057	0.0103577	0.0099876	0.00639863	0.00775909	0.021593	0.0150754	0.0186223	0.00261517	0.00256486	0.00372076	0.00290449	0.170783	0.119845	0.223262
Inner Mongolia	2017	0.0271797	0.0113926	0.0270844	0.0153455	0.0261556	0.00532075	0.00948076	0.00634135	0.000330533	0.0104358	0.0113644	0.00724988	0.00915622	0.0219129	0.0149052	0.0206325	0.00372554	0.00397981	0.00415441	0.00290449	0.202306	0.163111	0.187272
Inner Mongolia	2018	0.0266007	0.0108113	0.0272761	0.0161609	0.0285784	0.00545755	0.00992348	0.00635088	0.00171944	0.0111299	0.0112452	0.00831321	0.00880078	0.0238963	0.0223388	0.0230912	0.00411003	0.00301725	0.00452131	0.00290449	0.228406	0.151751	0.192718
Inner Mongolia	2019	0.0267863	0.0100991	0.0272996	0.0170788	0.0293828	0.00550439	0.0100928	0.00634452	0.00298839	0.0119017	0.0120151	0.0096052	0.00887637	0.0267318	0.0198988	0.0223445	0.00549882	0.00262978	0.00483475	0.00290449	0.247153	0.170589	0.200159
Inner Mongolia	2020	0.0267795	0.00938473	0.027299	0.0179397	0.0294769	0.00562321	0.0103755	0.00631335	0.00200186	0.0130978	0.0129664	0.0107259	0.00887352	0.0296489	0.0238331	0.022162	0.00774277	0.00507445	0.00494899	0.00290449	0.263332	0.180912	0.20265
Inner Mongolia	2021	0.0263548	0.00891883	0.0272988	0.0187675	0.0309056	0.0052449	0.0101358	0.00617312	0.00317124	0.0144828	0.0120406	0.0122708	0.00867683	0.0363879	0.0253463	0.0209167	0.00703014	8.29844e-05	0.00642446	0.00290449	0.294485	0.209806	0.212718
Inner Mongolia	2022	0.0263772	0.00929599	0.037726	0.0203837	0.0313945	0.00540565	0.0102599	0.00575661	0.00305161	0.0165097	0.0127326	0.0134091	0.00536008	0.0455997	0.0222821	0.0233075	0.00730193	0.00063998	0.00550828	0.00290449	0.319602	0.187751	0.223045
Inner Mongolia	2023	0.0265544	0.00878571	0.0415223	0.0218711	0.0318583	0.00547822	0.0102599	0.00541754	0.00215738	0.0170372	0.0123437	0.0147882	0.00460888	0.0504676	0.022755	2.18594e-06	0.00365925	0.00507074	0.00966172	0.00290449	0.335044	0.213255	0.222065
Liaoning	2011	0.0123544	0.0150844	0.0130682	0.0104395	0.0162713	0.00632063	0.00794359	0.0049556	0.00407072	0.0137495	0.00951926	0.00325823	0.00812142	0.00372961	0.0126732	0.00840899	0.00293005	0.00461361	0.0201119	0.00417839	0.0367115	0.0254854	0.0156288
Liaoning	2012	0.012552	0.014969	0.0140439	0.0110144	0.0174025	0.00629562	0.00776101	0.00490739	0.00417299	0.0154821	0.00958516	0.00417469	0.00752802	0.00489381	0.0138648	0.0103457	0.00295988	0.00947389	0.0205064	0.00428031	0.0743194	0.0764294	0.0638273
Liaoning	2013	0.0125465	0.0147272	0.0114731	0.0114902	0.0175695	0.00624188	0.00768894	0.00487874	0.00407039	0.0166429	0.00942076	0.00513479	0.00983428	0.00728309	0.0149241	0.0119169	0.00359959	0.00889083	0.0216913	0.00428031	0.106472	0.117591	0.126016
Liaoning	2014	0.0124105	0.0148181	0.0120573	0.011935	0.013988	0.0062442	0.00766994	0.00487481	0.00247285	0.0172435	0.00880248	0.00603422	0.0090922	0.0076064	0.0169669	0.0113377	0.00354987	0.0114231	0.0238171	0.00443317	0.148152	0.105043	0.149219
Liaoning	2015	0.0125803	0.0148514	0.0124667	0.0123136	0.0174965	0.00623827	0.00770068	0.00499533	0.00295679	0.0180046	0.00917691	0.00678954	0.00886912	0.0108698	0.0171939	0.0113944	0.0039675	0.0189336	0.0251878	0.00453509	0.1641	0.115485	0.232308
Liaoning	2016	0.012106	0.0152064	0.0129322	0.0093917	0.0185425	0.00628283	0.00796567	0.00512726	0.00392865	0.0169341	0.0108197	0.0075086	0.00800262	0.0121131	0.0215255	0.0122798	0.00448457	0.000158603	0.0269666	0.00458604	0.175684	0.143509	0.181707
Liaoning	2017	0.0124356	0.0154149	0.013264	0.00960307	0.018665	0.0063115	0.00787688	0.00547995	0.00353198	0.0146303	0.00896253	0.00826454	0.00803394	0.013311	0.0200123	0.0117306	0.00583691	0.00387782	0.0290878	0.00468795	0.203119	0.191413	0.172335
Liaoning	2018	0.0125415	0.0153484	0.0133416	0.00973246	0.0175436	0.00631638	0.00805329	0.00567252	0.00297351	0.0154801	0.00885585	0.00905839	0.00806754	0.015546	0.0191611	0.0117948	0.00725884	0.00306577	0.0167745	0.00468795	0.230389	0.183481	0.206937
Liaoning	2019	0.0125719	0.014452	0.0134286	0.0102312	0.0194701	0.00637299	0.00834654	0.00579886	0.0042061	0.0167178	0.00966001	0.0103257	0.00802431	0.0189945	0.0268974	0.0128377	0.00987733	0.00888579	0.00959913	0.00468795	0.248002	0.198986	0.214122
Liaoning	2020	0.0127871	0.0135557	0.0134583	0.0107626	0.0187307	0.00639885	0.00881267	0.0057741	0.00313025	0.0175838	0.0100603	0.0114971	0.00819565	0.0242645	0.0294888	0.0128954	0.0155187	0.0072748	0.0100202	0.00458604	0.260525	0.216208	0.213313
Liaoning	2021	0.0129125	0.012868	0.013458	0.0111308	0.0203515	0.00642693	0.00891071	0.00577402	0.00428777	0.0189784	0.00986586	0.0130387	0.00830971	0.0249385	0.0330826	0.0104587	0.012877	0.0105775	0.00909634	0.00448413	0.288689	0.24028	0.221982
Liaoning	2022	0.0129061	0.0136223	0.0142012	0.0116073	0.0199121	0.00647696	0.00901242	0.00581313	0.00369617	0.0199979	0.00991136	0.0136421	0.0077177	0.0343613	0.031002	0.0118355	0.011044	0.0100688	0.00699402	0.00443317	0.30988	0.219564	0.234947
Liaoning	2023	0.0130114	0.0126239	0.0142416	0.0123589	0.0205518	0.006488	0.00908581	0.00578487	0.00420217	0.0203485	0.00969696	0.0150168	0.00777814	0.040552	0.0290348	9.29852e-07	0.00422272	0.0144457	0.0104168	0.00443317	0.323588	0.232527	0.235028
Jilin	2011	0.0156329	0.014019	0.0150043	0.0102364	0.0254786	0.00576142	0.00874861	0.00739354	0.00389143	0.00826035	0.013443	0.00292918	0.00938163	0.00528436	0.0234737	0.00652813	0.00141531	0.00182847	0.0021339	0.0392361	0.0186033	0.0116259	0.0114217
Jilin	2012	0.0159156	0.0135109	0.0153961	0.0111401	0.0277424	0.00563388	0.00833443	0.00740397	0.00387374	0.00917706	0.0131496	0.00389539	0.00929554	0.00584453	0.0324017	0.00744085	0.00149817	0.0022762	0.00233433	0.0431598	0.0576029	0.0585802	0.0711939
Jilin	2013	0.0162137	0.0130253	0.0123768	0.0119342	0.0285598	0.00552261	0.00835116	0.00735353	0.00388409	0.00985823	0.0128572	0.00480312	0.0125196	0.00614031	0.0352957	0.00812965	0.00189592	0.00104513	0.00245162	0.0472362	0.0895504	0.0949918	0.122434
Jilin	2014	0.0168296	0.0125691	0.013422	0.01279	0.0284122	0.00541344	0.00772696	0.00737125	0.00381279	0.0102316	0.01226	0.00567516	0.0119048	0.00610147	0.0333664	0.0078848	0.00187934	0.00472354	0.00248049	0.0517204	0.130582	0.0869586	0.139206
Jilin	2015	0.0170239	0.0121336	0.0148572	0.0138469	0.0319905	0.00536278	0.00752383	0.00733434	0.00364353	0.0107068	0.0126104	0.00615177	0.010654	0.00736573	0.0173452	0.0104375	0.00232349	0.00610897	0.00252768	0.0547268	0.148152	0.0995197	0.228597
Jilin	2016	0.0170154	0.0116752	0.015222	0.0136329	0.0334225	0.00533659	0.0077999	0.00732301	0.00374925	0.0100775	0.0112418	0.00684721	0.0103245	0.0099089	0.0186125	0.014062	0.00279084	0.00212348	0.00261262	0.057937	0.162196	0.132795	0.177976
Jilin	2017	0.0182635	0.0112382	0.0157599	0.014445	0.0334492	0.00536516	0.00796347	0.00728947	0.00349584	0.00740837	0.00806128	0.00756946	0.0108521	0.011554	0.0193502	0.014171	0.00334769	0.00298361	0.00271431	0.0608925	0.19251	0.179544	0.170727
Jilin	2018	0.0182474	0.0108397	0.0157599	0.015266	0.0292223	0.00539533	0.00835263	0.00741764	0.00313273	0.00789345	0.00848043	0.00826574	0.0108394	0.0135791	0.0218092	0.0137312	0.00412329	0.00356202	0.00281936	0.0622683	0.217354	0.167167	0.208881
Jilin	2019	0.0183575	0.0104188	0.0159053	0.016116	0.0312105	0.00540903	0.00852383	0.00750484	0.00397794	0.00893748	0.0121882	0.00930253	0.0108	0.0153091	0.0175155	0.0144158	0.00440834	0.00470952	0.00282062	0.0634403	0.233748	0.181095	0.209532
Jilin	2020	0.0184608	0.0100279	0.0158693	0.017217	0.0306048	0.00542854	0.00865064	0.00755475	0.00324136	0.0110922	0.0140398	0.0102897	0.0109112	0.0181153	0.0190287	0.0147584	0.00651307	0.00278728	0.00291406	0.063746	0.246582	0.195697	0.212724
Jilin	2021	0.0185707	0.00962878	0.015869	0.0183592	0.0325184	0.00545393	0.00878207	0.00765966	0.00429208	0.0110774	0.0130502	0.0116641	0.010997	0.025021	0.0249869	0.0118095	0.00637718	0.00329522	0.00378823	0.063746	0.276123	0.220315	0.218306
Jilin	2022	0.0186903	0.0101834	0.0158785	0.0193037	0.0328557	0.00545672	0.00886565	0.00770631	0.00434818	0.0120697	0.0143893	0.0120942	0.0110817	0.032031	0.0202392	0.0131677	0.00566786	0.005561	0.00303704	0.063695	0.295118	0.197768	0.225889
Jilin	2023	0.0188917	0.00956222	0.0162569	0.0201671	0.0337127	0.0054595	0.00901242	0.00770631	0.00427507	0.0117064	0.0135208	0.0132616	0.010911	0.0366458	0.0203906	1.25514e-06	0.00231355	0.00493435	0.00460405	0.0636441	0.308039	0.217077	0.223968
Heilongjiang	2011	0.0369506	0.014592	0.0373137	0.0181265	0.0449357	0.00539379	0.00637368	0.00687023	0.00289853	0.0120923	0.015068	0.00270923	0.00907427	0.0109783	0.0392679	0.00909307	0.00331454	0.00229304	0.00300741	0.00438222	0.016358	0.0198609	0.0350591
Heilongjiang	2012	0.0369934	0.0143615	0.041235	0.0201868	0.0532713	0.00526279	0.00618633	0.00661589	0.00193563	0.0150371	0.0172336	0.00356895	0.00790444	0.0148784	0.0399867	0.010994	0.0040802	0.00479048	0.00334528	0.00448413	0.0550843	0.0630408	0.072264
Heilongjiang	2013	0.0368832	0.0149313	0.0462324	0.0215285	0.0484508	0.00521103	0.00592912	0.00659363	0.00160693	0.0177886	0.0194663	0.00444352	0.00664955	0.0190617	0.029886	0.0117935	0.00474642	7.53291e-05	0.00349091	0.00489178	0.0875355	0.0981068	0.132571
Heilongjiang	2014	0.0369597	0.0155125	0.0459062	0.0229149	0.0503814	0.00513393	0.00568219	0.00662059	0.00368258	0.0188454	0.0194122	0.00538983	0.00674266	0.0175204	0.0299995	0.012457	0.00534304	0.000505195	0.00363581	0.00494273	0.128507	0.0913116	0.144646
Heilongjiang	2015	0.0371671	0.0149579	0.0478997	0.0242132	0.0615192	0.00509655	0.00600742	0.00665808	0.00328851	0.019452	0.0195206	0.00595019	0.00637391	0.0194809	0.0326287	0.0174079	0.00701357	0.00375462	0.00380348	0.00499369	0.147461	0.10583	0.226485
Heilongjiang	2016	0.0375706	0.0142923	0.0514505	0.0250823	0.0599	0.00512486	0.00604228	0.00667283	0	0.0200695	0.0194041	0.00659314	0.0057951	0.0214431	0.0320612	0.0204806	0.00705997	0.00179948	0.00407496	0.00499369	0.1616	0.134412	0.193396
Heilongjiang	2017	0.0446994	0.0135779	0.0523184	0.0258949	0.059853	0.00514201	0.00598768	0.00675209	0.00288375	0.0216408	0.0208633	0.00732017	0.00739307	0.0238964	0.0315316	0.0208227	0.00878353	0.00380036	0.00420247	0.00519751	0.191272	0.181049	0.178078
Heilongjiang	2018	0.0444123	0.0130055	0.0531012	0.0271213	0.0606354	0.0052035	0.00665078	0.00681818	7.41111e-05	0.021793	0.0205186	0.00831416	0.00716355	0.0267613	0.0330826	0.021316	0.00858797	0.00271908	0.0043711	0.0050956	0.216993	0.166935	0.205399
Heilongjiang	2019	0.0447069	0.0121846	0.0536138	0.0283638	0.0606046	0.00545097	0.00737838	0.00697642	0.000736796	0.0230281	0.0262168	0.00934277	0.00713259	0.0291955	0.0258381	0.0225298	0.0121047	0.00411126	0.00452836	0.0050956	0.233783	0.180229	0.211103
Heilongjiang	2020	0.0451334	0.0114924	0.0535609	0.0302471	0.0609111	0.00544047	0.00763655	0.007014	0.00112699	0.0250813	0.0281639	0.0103782	0.00724548	0.0345633	0.0338203	0.0233611	0.0162777	0.00971272	0.00475519	0.0050956	0.246324	0.193048	0.209798
Heilongjiang	2021	0.0456051	0.0110043	0.0535609	0.0308675	0.0635618	0.00527733	0.00790506	0.00728221	0.00365885	0.0251696	0.0260986	0.0118802	0.00735876	0.0389101	0.0462098	0.0221974	0.0133377	8.19615e-05	0.00627741	0.00504465	0.278012	0.22097	0.219144
Heilongjiang	2022	0.0460448	0.0110487	0.0533955	0.0316768	0.0627136	0.00528243	0.00805843	0.00736724	0.00445131	0.0262132	0.0254511	0.0124807	0.00749818	0.0464897	0.0360334	0.0239502	0.0110208	0.00212249	0.00456373	0.00504465	0.296867	0.200887	0.230868
Heilongjiang	2023	0.0463335	0.0100281	0.0541519	0.0328027	0.0629172	0.00528138	0.00805843	0.00742375	0.004114	0.0253011	0.0248271	0.0135095	0.00741367	0.0543467	0.0258949	2.4528e-06	0.00408683	0.0016916	0.00644724	0.00499369	0.310011	0.218949	0.225674
Shanghai	2011	0.00095032	0.000383376	0.000798391	5.30141e-05	0.000755713	0.00778806	0.0116326	0.00842717	0.00453016	0.00033844	0.00050607	0.0100016	0.00540015	0.00371042	0	0.00412616	0.00498507	0.0110019	0.0111152	0.000203824	0.0827204	0.0534737	0
Shanghai	2012	0.000911586	0.000570184	0.000793179	8.49313e-05	0.000869232	0.0077989	0.0116677	0.00846076	0.00454052	0.00036732	0.000486127	0.0114985	0.00513854	0.00296003	5.67455e-05	0.00556758	0.00582365	0.00944874	0.0113761	0.000203824	0.125835	0.113002	0.0587754
Shanghai	2013	0.000879307	0.000584826	0.000661272	8.69233e-05	0.000692467	0.00780118	0.0117262	0.00845692	0.00452617	0.000374423	0.000440072	0.0130312	0.00559211	0.00332184	5.67455e-05	0.00478281	0.00642358	0.0151652	0.0483177	0.000203824	0.158244	0.18446	0.125436
Shanghai	2014	0.000817406	0.000550438	0.000661272	0.000107703	0.000678682	0.00780815	0.0117521	0.00846113	0.00454333	0.000369321	0.000366215	0.0147625	0.00509373	0.00415602	0	0.00516831	0.0069307	0.014144	0.0489428	0.000203824	0.200684	0.158793	0.131957
Shanghai	2015	0.000766337	0.000577061	0.000697672	0.000113362	0.000783282	0.00781076	0.0117706	0.00849665	0.00454311	0.000290131	0.000264261	0.01652	0.00449996	0.00532911	7.56607e-05	0.00682956	0.00760024	0.0204031	0.0508055	0.000203824	0.219432	0.17025	0.206671
Shanghai	2016	0.000627741	0.000564637	0.000711808	0.000128302	0.000673006	0.00781913	0.0118074	0.008524	0.00455303	0.000219272	0.000209241	0.0185408	0.00334895	0.00420978	0	0.00836326	0.00898572	0.0223478	0.0543603	0.000203824	0.232465	0.184827	0.170291
Shanghai	2017	0.000598051	0.000497857	0.000720158	0.000126175	0.000575704	0.00782205	0.011836	0.0085635	0.00454333	0.000249689	0.000178868	0.0205523	0.00308355	0.00449817	7.56607e-05	0.0116617	0.00997345	0.0273977	0.0560245	0.00025478	0.25948	0.261911	0.181762
Shanghai	2018	0.000589894	0.000462137	0.000720158	0	0.000607327	0.00782788	0.0118614	0.00858845	0.0045485	0.000237435	0.000131055	0.0227777	0.00302016	0.00487158	5.67455e-05	0.0120025	0.011992	0.013093	0.0582579	0.00025478	0.29401	0.264837	0.243685
Shanghai	2019	0.00052633	0.000461472	0.000720158	1.84173e-05	0.000544081	0.00783714	0.0118912	0.00863276	0.00454699	0.00021829	7.7756e-05	0.0252395	0.00252627	0.00572752	1.89152e-05	0.0133622	0.0138813	0.0548377	0.0609567	0.00025478	0.32126	0.291422	0.256057
Shanghai	2020	0.000507347	0.000461693	0.000493019	3.69048e-05	0.000507593	0.0078442	0.0119005	0.00864262	0.00455098	0.000198006	7.25106e-05	0.0267373	0.00331918	0.00543846	3.78304e-05	0.0121027	0.019579	0.0743686	0.0601302	0.00025478	0.335734	0.324235	0.249215
Shanghai	2021	0.000535319	0.000110931	0.000492612	3.97116e-05	0.000528675	0.00784752	0.0119196	0.00867517	0.00452941	0.000153995	3.15403e-05	0.0298876	0.00357239	0.00714507	0	0.0116422	0.0189923	0.0294013	0.000402377	0.000305736	0.368364	0.339044	0.248812
Shanghai	2022	0.000550012	2.21861e-05	0.000453871	2.81711e-05	0.000541648	0.00784794	0.0119478	0.00866703	0.00455185	0.000172583	1.55101e-05	0.0309426	0.0039054	0.00879114	1.89152e-05	0.00992681	0.0144149	0.0507777	0.000112229	0.000305736	0.387564	0.308855	0.258842
Shanghai	2023	0.000562269	0	0.000462573	5.163e-05	0.000592732	0.00784923	0.0119478	0.00866703	0.004556	0.0001567	0	0.0337868	0.00397171	0.0102302	9.45759e-05	6.95301e-07	0.00654953	0.0654578	0.000462414	0.000305736	0.396638	0.322039	0.264318
Jiangsu	2011	0.0230658	0.021578	0.0327661	0.018164	0.0265878	0.00419068	0.00574684	0.00599849	0.00344299	0.0202299	0.00682944	0.00564364	0.00540066	0.00588792	0.0132595	0.0157896	0.0122903	0.0350365	0.088982	0.0396438	0.0552721	0.0487506	0.0045788
Jiangsu	2012	0.0230302	0.0208301	0.0337539	0.0186553	0.0275916	0.00425992	0.00595415	0.00582584	0.00380394	0.0225386	0.00692306	0.00685599	0.00512952	0.00791648	0.0136757	0.0192626	0.0170566	0.0228336	0.0939552	0.0435674	0.0894138	0.100778	0.057649
Jiangsu	2013	0.0231279	0.0201812	0.0324776	0.0195199	0.0275219	0.00430549	0.00613893	0.00570445	0.00403091	0.0239496	0.00667253	0.00806746	0.00550311	0.0105174	0.0108762	0.0221811	0.0225422	0.0288569	0.0998094	0.0471343	0.121848	0.145545	0.122056
Jiangsu	2014	0.0231126	0.0193101	0.0334076	0.0206262	0.02807	0.0043411	0.00625825	0.00561968	0.00395863	0.0251026	0.00608632	0.00932208	0.00524942	0.0108347	0.0132028	0.0229723	0.024448	0.0492216	0.101645	0.0504465	0.163255	0.130744	0.134289
Jiangsu	2015	0.0233149	0.0183189	0.0339551	0.0214208	0.0289141	0.00438114	0.00636326	0.00580626	0.0038924	0.027476	0.00620082	0.0104552	0.0051856	0.0110553	0.0130515	0.025764	0.0266522	0.0448919	0.101715	0.0539624	0.182687	0.142538	0.211346
Jiangsu	2016	0.0231075	0.0176344	0.0348525	0.0217878	0.0284901	0.00446377	0.00650387	0.00578654	0.00423156	0.0283015	0.00572973	0.0116326	0.0048882	0.0113416	0.013373	0.025177	0.0325223	0.0391562	0.103552	0.0574274	0.197439	0.165721	0.177531
Jiangsu	2017	0.0227405	0.0166374	0.0355399	0.0221719	0.0290447	0.00455966	0.00672527	0.00575421	0.00445853	0.0280031	0.00509887	0.0129876	0.0045956	0.0117586	0.0143188	0.0234553	0.0370731	0.0727499	0.104591	0.06023	0.230823	0.216754	0.178597
Jiangsu	2018	0.0226303	0.0159279	0.0359636	0.022291	0.029446	0.00468575	0.00698703	0.00572655	0.00414645	0.0281294	0.00482976	0.01446	0.00446186	0.0126613	0.0138648	0.0254594	0.0447629	0.00177051	0.107098	0.0624211	0.264656	0.21955	0.225864
Jiangsu	2019	0.022394	0.015221	0.0361899	0.0227177	0.0298182	0.00475477	0.00714876	0.00578055	0.00431452	0.0293848	0.00464791	0.0160576	0.00432912	0.0236716	0.012938	0.0263713	0.0572852	0.00815183	0.107984	0.0645613	0.289883	0.241355	0.233917
Jiangsu	2020	0.022503	0.014537	0.0363603	0.0231789	0.0300039	0.00481516	0.007273	0.00584771	0.00440967	0.0312008	0.00476609	0.017387	0.00433087	0.0301058	0.0111978	0.0278753	0.0715311	0.0675334	0.111418	0.0653256	0.307479	0.261209	0.233231
Jiangsu	2021	0.0226127	0.0135335	0.03636	0.022882	0.0301418	0.00487262	0.00743122	0.00601728	0.00446145	0.0325226	0.00436071	0.0196496	0.00436944	0.0358935	0.0110654	0.0282573	0.0584851	0.0373186	0.0286556	0.0654275	0.338682	0.284079	0.238376
Jiangsu	2022	0.022673	0.0134448	0.0330649	0.0234064	0.0303283	0.00493255	0.00761813	0.00612395	0.00447116	0.0343573	0.00433563	0.0211296	0.00516997	0.0434337	0.00994938	0.0283124	0.0480078	0.0930767	0.0298655	0.0647651	0.360974	0.265895	0.255884
Jiangsu	2023	0.0228427	0.0133117	0.0331087	0.0238416	0.0305602	0.00496684	0.00769151	0.00618046	0.0045244	0.0351723	0.00424793	0.0228766	0.00522382	0.0502358	0.0121625	2.70996e-06	0.0181504	0.0825582	0.0336676	0.0642046	0.37452	0.279217	0.256227
Zhejiang	2011	0.00722958	0.0114429	0.0119057	0.0107173	0.00610408	0.0069021	0.00740869	0.00735548	0.00409132	0.00930993	0.00531085	0.00865748	0.00397133	0.00185514	0.00718777	0.00953602	0.0117964	0.0146898	0.0468531	0.00402553	0.0713483	0.0583716	0.00768202
Zhejiang	2012	0.0068077	0.0106269	0.0120313	0.0108447	0.00502241	0.00690121	0.00748061	0.0072461	0.00395853	0.00981	0.00521264	0.0100618	0.00347252	0.00350813	0.00786871	0.0104271	0.0180278	0.0378517	0.0480673	0.00412744	0.108034	0.130293	0.0560326
Zhejiang	2013	0.00677048	0.00978364	0.0114868	0.0107216	0.00571812	0.00689814	0.00753021	0.00717896	0.00312497	0.0105322	0.00511679	0.0115352	0.00374518	0.00429669	0.012938	0.0131048	0.0189492	0.000464194	0.0500127	0.00412744	0.141723	0.174065	0.120829
Zhejiang	2014	0.00665496	0.00899648	0.011628	0.0105311	0.00590786	0.00692923	0.00778339	0.00715031	0.00433631	0.0105613	0.00477421	0.0131754	0.00354205	0.00508824	0.00783088	0.0134001	0.0229366	0.00874502	0.0500365	0.00412744	0.184001	0.152664	0.125666
Zhejiang	2015	0.00670533	0.00815695	0.0116879	0.0102622	0.00450184	0.00695238	0.00795144	0.00709999	0.00413221	0.0109203	0.00460458	0.0147044	0.0035601	0.00568224	0.0101575	0.0188792	0.0282333	0.00759358	0.0500487	0.00412744	0.202656	0.164518	0.206238
Zhejiang	2016	0.0066563	0.00735781	0.011813	0.00924791	0.00434616	0.00698608	0.00846336	0.00710445	0.00406446	0.0117794	0.00447463	0.016224	0.00343919	0.00569736	0.00883339	0.0184534	0.0297778	0.0198858	0.0511885	0.00412744	0.215558	0.177526	0.169566
Zhejiang	2017	0.00576307	0.00663853	0.0117987	0.00895626	0.00447022	0.00700651	0.00869665	0.00708775	0.00444063	0.0115664	0.00399581	0.0180479	0.00253072	0.00630044	0.00281836	0.0177965	0.035913	0.0173574	0.0539956	0.00417839	0.245963	0.241963	0.177454
Zhejiang	2018	0.00575568	0.00572691	0.0117643	0.00867132	0.00462428	0.00706036	0.00888583	0.00706401	0.0043745	0.0118246	0.00372937	0.0200961	0.00253988	0.00689763	0.010706	0.0185058	0.0398408	0.0269114	0.0557535	0.00417839	0.28021	0.245736	0.232877
Zhejiang	2019	0.00581943	0.00497879	0.0114518	0.00821275	0.00456752	0.00711855	0.00926398	0.00712036	0.00417471	0.0126246	0.00357505	0.0223422	0.0027631	0.00824805	0.00680946	0.0190111	0.0367019	0.0269262	0.0567757	0.00412744	0.307731	0.267696	0.243063
Zhejiang	2020	0.00586474	0.00417099	0.0115425	0.00778323	0.0046778	0.00715051	0.00941156	0.00711598	0.0044334	0.0131972	0.00356766	0.0241356	0.00276396	0.00998544	0.0331583	0.0195386	0.0436724	0.0356004	0.0574093	0.00412744	0.324523	0.290979	0.237895
Zhejiang	2021	0.00586502	0.00412662	0.0115425	0.00760434	0.00480105	0.00716541	0.00955818	0.007037	0.00439564	0.0135296	0.0031691	0.0270306	0.00276423	0.0119315	0.0125975	0.0203145	0.0383426	0.0401862	0.0233393	0.00407648	0.35343	0.310699	0.240503
Zhejiang	2022	0.00590328	0.00406006	0.00986776	0.00757675	0.00480186	0.00717885	0.00967288	0.00705641	0.004443	0.014229	0.00315382	0.0290535	0.00380342	0.0140506	0.0331583	0.0212324	0.0338779	0.0496909	0.031732	0.00407648	0.375275	0.280795	0.257138
Zhejiang	2023	0.0059466	0.00392695	0.00999641	0.0076966	0.00494619	0.0071925	0.00981964	0.00711293	0.0045458	0.0151409	0.00296538	0.0314502	0.00376761	0.0164967	0.004237	2.00194e-06	0.0150447	0.0238944	0.0316523	0.00397457	0.386919	0.294031	0.258981
Anhui	2011	0.0272062	0.0350297	0.0303783	0.0251856	0.0251907	0.00427406	0.00347377	0.00657283	0.00313543	0.0130465	0.0146699	0.00221085	0.00782062	0.00923308	0.0136378	0.00898808	0.00486575	0.00764426	0.00628491	0.00377075	0.0155725	0.0328458	0.0152514
Anhui	2012	0.0270438	0.0335277	0.0307091	0.0262979	0.0284941	0.00423143	0.00352764	0.00642994	0.0033131	0.014132	0.0140893	0.00309676	0.00763359	0.0117598	0.0146403	0.0109959	0.00831618	0.0128261	0.0069245	0.0038217	0.0547257	0.0883378	0.0646157
Anhui	2013	0.0269709	0.0321632	0.0370742	0.0273732	0.0263591	0.00417747	0.00345183	0.00632508	0.00264729	0.0152672	0.0135834	0.00399052	0.005719	0.0125079	0.0198799	0.0122144	0.0116241	0.00515477	0.00745711	0.00387266	0.0892601	0.123861	0.122141
Anhui	2014	0.0269705	0.0309563	0.0373053	0.0283943	0.0274635	0.00414443	0.00373069	0.00628911	0.00386457	0.0161338	0.0127509	0.00492131	0.00566225	0.0125674	0.0236251	0.0128407	0.0119025	0.00906855	0.00796454	0.00397457	0.131991	0.11241	0.149045
Anhui	2015	0.0269855	0.0305326	0.0379118	0.0293684	0.0328265	0.00417426	0.00394541	0.00623859	0.00351354	0.0168089	0.012399	0.00571061	0.0055219	0.0130891	0.0266326	0.0147579	0.0125953	0.0131337	0.00847642	0.00412744	0.144874	0.123135	0.210439
Anhui	2016	0.0268124	0.0302508	0.0382397	0.0306654	0.0318908	0.00430352	0.00433757	0.00626619	0.00310954	0.0178786	0.0116707	0.00649592	0.00538728	0.0147467	0.022736	0.0159608	0.0129797	0.0139029	0.00874679	0.00417839	0.164719	0.150164	0.186395
Anhui	2017	0.0263041	0.0298026	0.0388289	0.0281545	0.0323602	0.00439515	0.00480063	0.00624825	0.00412509	0.0176459	0.0105818	0.00740169	0.0050861	0.0162704	0.0225091	0.0174188	0.0168246	0.0102773	0.00928496	0.00417839	0.198705	0.203713	0.178475
Anhui	2018	0.0264394	0.0295874	0.0391306	0.0292001	0.0322597	0.00447173	0.00518347	0.00624183	0.00362519	0.017948	0.00971501	0.00848206	0.00506448	0.0177058	0.0186504	0.018005	0.0206131	0.0111994	0.00981105	0.00417839	0.231749	0.203763	0.21751
Anhui	2019	0.0264724	0.0294388	0.0395065	0.0296829	0.0326384	0.00462412	0.00561688	0.00607492	0.00352292	0.0199256	0.00865695	0.00972141	0.00499415	0.0182105	0.0147728	0.0188075	0.0221975	0.0203413	0.0102749	0.00422935	0.255433	0.225233	0.224451
Anhui	2020	0.0265822	0.017638	0.0397538	0.0303577	0.0323562	0.00471399	0.00598211	0.00608724	0.00322087	0.0220218	0.00908366	0.0107725	0.00497688	0.0224584	0.00902254	0.0236104	0.0274444	0.0201269	0.0111722	0.00422935	0.274726	0.241792	0.225732
Anhui	2021	0.0267916	0.0168393	0.0397535	0.0309227	0.0329108	0.00477118	0.00651788	0.00610685	0.00423706	0.0233285	0.00861929	0.0123012	0.00504429	0.0294275	0.0210526	0.0240768	0.0262445	0.0168161	0.015342	0.00422935	0.309459	0.264487	0.234311
Anhui	2022	0.0269342	0.0170833	0.0394653	0.0315828	0.0330122	0.00482133	0.00673752	0.00612395	0.00413523	0.0244343	0.008594	0.0133514	0.00515251	0.0415196	0.0170047	0.025337	0.0275571	0.0338358	0.0167582	0.00422935	0.33049	0.243447	0.250478
Anhui	2023	0.0272702	0.0165952	0.0403746	0.0321461	0.0334233	0.00484566	0.00688429	0.00615221	0.00452536	0.0243127	0.00817674	0.0147209	0.00506516	0.0477674	0.0194448	2.35609e-06	0.0115578	0.00107553	0.0187444	0.00407648	0.343181	0.254188	0.249498
Fujian	2011	0.00669089	0.0122911	0.00758249	0.00523731	0.00522188	0.00658287	0.00781803	0.00737249	0.00441279	0.010102	0.010156	0.00407955	0.00700501	0.00150147	0.00433158	0.00531016	0.00438845	0.000421334	0.014796	0.0311341	0.0523523	0.041545	0.0207933
Fujian	2012	0.00662182	0.0117808	0.00759161	0.00540024	0.00420426	0.00658359	0.00784958	0.00734768	0.00438453	0.0112191	0.00997141	0.00513741	0.00688792	0.00194117	0.00472879	0.00623672	0.00555517	0.00559881	0.017143	0.0329686	0.094579	0.0898112	0.0671389
Fujian	2013	0.00671041	0.0108934	0.0089514	0.00562642	0.00515377	0.00658683	0.00785266	0.00733463	0.00425778	0.0123285	0.00978625	0.00622057	0.00555877	0.00228793	0.00546649	0.0079753	0.00793832	0.003067	0.0190209	0.0339877	0.132733	0.126055	0.13532
Fujian	2014	0.00675008	0.010494	0.00889576	0.00576944	0.00517485	0.00656426	0.00795635	0.00728439	0.0044457	0.0132997	0.00924461	0.0073074	0.00566346	0.00267991	0.00576913	0.00818224	0.00835927	0.00804226	0.0201862	0.034803	0.172681	0.106362	0.145407
Fujian	2015	0.00682949	0.0102056	0.00841454	0.00584088	0.00382073	0.00655112	0.00800193	0.00725232	0.00433707	0.0140899	0.00899271	0.00830461	0.00625258	0.002866	0.00410459	0.0112869	0.0142691	0.00704316	0.0209296	0.0352106	0.191788	0.12882	0.21651
Fujian	2016	0.00681729	0.00954004	0.00835902	0.00532007	0.00363667	0.00655068	0.00803003	0.00724223	0.00413922	0.0158589	0.00904898	0.00935765	0.00629446	0.00285339	0.0139594	0.0104878	0.0213821	0.00781038	0.0211178	0.0362297	0.203625	0.16037	0.168464
Fujian	2017	0.00444828	0.00883008	0.00844267	0.00515405	0.00371694	0.00663384	0.00826633	0.00724248	0.00449435	0.0150163	0.0075563	0.0105234	0.00290851	0.00320639	0.00620418	0.0114361	0.0215213	0.0223051	0.021336	0.0368412	0.233452	0.220387	0.172839
Fujian	2018	0.00453345	0.00843073	0.00862237	0.00513526	0.00380938	0.00669562	0.00848824	0.00731067	0.00447148	0.0161572	0.00728896	0.0118207	0.00290175	0.00365409	0.00438832	0.0110226	0.0246734	0.000425583	0.0221959	0.037045	0.264966	0.220364	0.22538
Fujian	2019	0.00460038	0.00774296	0.00854816	0.00517809	0.00377127	0.00674511	0.00875727	0.00735291	0.00442358	0.017802	0.00669744	0.0133457	0.00304505	0.0039797	0.00499361	0.011292	0.0250314	0.00752643	0.0229762	0.037096	0.28916	0.240166	0.232414
Fujian	2020	0.00469776	0.0067224	0.00884539	0.00527982	0.00383938	0.00680547	0.00892708	0.00754175	0.00448626	0.0188707	0.00681001	0.0144908	0.00297194	0.00471884	0.00393436	0.0114961	0.0296022	0.00657807	0.0244835	0.0371979	0.305006	0.265783	0.22654
Fujian	2021	0.0047605	0.0062343	0.00884521	0.00532655	0.00387262	0.00685161	0.00903524	0.00769772	0.00450568	0.0200825	0.00648561	0.0165407	0.0030558	0.00568251	0.00607177	0.00936471	0.0222107	0.0190653	0.0170807	0.037096	0.334715	0.28883	0.230798
Fujian	2022	0.00485266	0.00618993	0.0065929	0.00544512	0.00389127	0.0069021	0.00915919	0.00767806	0.00444214	0.0213011	0.00632213	0.0180748	0.00521633	0.00656476	0.0066014	0.0104824	0.0189824	0.0160965	0.0151772	0.0369941	0.357389	0.270536	0.245218
Fujian	2023	0.00494437	0.00596807	0.00662233	0.00556723	0.00390992	0.00693437	0.00930596	0.00779108	0.00446637	0.0222169	0.00646652	0.0195895	0.00534017	0.00756904	0.00489903	7.36172e-07	0.00849185	0.0224042	0.0187167	0.0369431	0.366744	0.279386	0.244791
Jiangxi	2011	0.0164383	0.0174405	0.0155357	0.0185892	0.0164116	0.00636344	0.00479013	0.00765799	0.00339638	0.00798607	0.0132165	0.0024919	0.00960076	0.00318442	0.0100061	0.00735629	0.000742457	0.00136994	0.0040633	0.0329176	0.0102536	0.0323345	0.0161244
Jiangxi	2012	0.0165544	0.0163911	0.0158837	0.0203985	0.0171235	0.00635802	0.00472585	0.00758552	0.00382983	0.00876184	0.0130509	0.00333853	0.00941712	0.00407833	0.0109708	0.00982844	0.00102088	0.00224035	0.00447169	0.0362297	0.0493983	0.0847182	0.0655225
Jiangxi	2013	0.0166386	0.0155924	0.016666	0.00869305	0.0169249	0.00635451	0.00476188	0.0075537	0.00342465	0.00948549	0.0126168	0.00419913	0.0088995	0.00434374	0.00767956	0.0112019	0.00136228	0.00270362	0.00482057	0.0389814	0.08354	0.119064	0.125706
Jiangxi	2014	0.0166933	0.0146628	0.0167187	0.00916506	0.0171471	0.0063402	0.00514039	0.00750507	0.00403091	0.0100842	0.0118904	0.00509602	0.00890261	0.00486269	0.00819027	0.0127759	0.00230029	0.00287209	0.00519365	0.0411725	0.125306	0.107936	0.153528
Jiangxi	2015	0.0167193	0.013873	0.0169493	0.00980988	0.0178939	0.00633233	0.00520578	0.00748091	0.00406522	0.0106199	0.0117628	0.00598848	0.00875997	0.00509495	0.0087199	0.0142357	0.00415975	0.00149495	0.00532134	0.0425992	0.144199	0.118223	0.209262
Jiangxi	2016	0.0166632	0.013061	0.0170302	0.00954186	0.0178841	0.00635012	0.00532943	0.00751538	0.00370836	0.0117157	0.0114164	0.00686011	0.00866328	0.00535467	0.00883339	0.0148386	0.00654622	0.00686271	0.00558005	0.0429559	0.159506	0.145307	0.187829
Jiangxi	2017	0.0169001	0.0122534	0.0170531	0.0100307	0.0177811	0.00642758	0.00565606	0.00749414	0.00408021	0.011468	0.0101472	0.00782378	0.00881978	0.00684156	0.0104979	0.0155234	0.0100828	0.0118392	0.00579781	0.0430578	0.193427	0.201272	0.178422
Jiangxi	2018	0.0166484	0.0112683	0.0169877	0.0103584	0.0175298	0.00655781	0.00643056	0.00753061	0.00398388	0.0117895	0.00942978	0.00888694	0.00868168	0.00953625	0.0119733	0.0153114	0.0119589	0.00468139	0.00601818	0.0431598	0.225821	0.194947	0.217631
Jiangxi	2019	0.016543	0.010423	0.0170241	0.0107599	0.0172606	0.00664216	0.0074933	0.00753621	0.00326111	0.0131339	0.00917143	0.0100534	0.00857991	0.0108621	0.0127299	0.0158323	0.0122041	0.00934453	0.00639373	0.0430578	0.249606	0.210196	0.221556
Jiangxi	2020	0.0169181	0.00965097	0.0170449	0.0113049	0.0173125	0.00671691	0.00822663	0.00752841	0.0035391	0.0145055	0.00963996	0.0110873	0.00883857	0.0138439	0.00779305	0.0189107	0.0154159	0.0140542	0.00700172	0.0430069	0.268229	0.233104	0.220174
Jiangxi	2021	0.0170051	0.0089632	0.017045	0.0117771	0.0175428	0.00671941	0.00830581	0.00753124	0.00410222	0.0152221	0.00868506	0.012574	0.00890177	0.0183921	0.00906037	0.0194713	0.0132316	0.0157042	0.00905427	0.0428031	0.300236	0.254124	0.227257
Jiangxi	2022	0.0171805	0.00849729	0.0181757	0.0124236	0.0172152	0.00672916	0.00835197	0.00748026	0.0033569	0.0161342	0.00841603	0.0136666	0.00827978	0.0241311	0.00983589	0.0201413	0.00866752	0.0109994	0.0101278	0.0427012	0.317262	0.233964	0.243772
Jiangxi	2023	0.0173829	0.00823106	0.0183552	0.0129459	0.0175914	0.00673559	0.00842535	0.00748026	0.00433872	0.0160335	0.00837849	0.0149077	0.00830606	0.0353246	0.00998721	1.72549e-06	0.00337089	0.0101122	0.0108998	0.0424973	0.327525	0.244681	0.241899
Shandong	2011	0.0328169	0.047587	0.0430938	0.0543464	0.0356572	0.00268167	0	1.15852e-05	0.00227242	0.0290073	0.00967991	0.00359339	0.00617529	0.00201988	0.0375088	0.0144069	0.011707	0.0211226	0.0251189	0.00687906	0.0270726	0.0271809	0.0177013
Shandong	2012	0.0328216	0.0454394	0.0437232	0.0558025	0.0388154	0.00265271	0.000209658	1.89884e-05	0.00259022	0.0311731	0.00945456	0.00456309	0.00603817	0.00566983	0.0417458	0.0172121	0.0144945	0.021377	0.0256334	0.00698098	0.0667551	0.0812533	0.0620081
Shandong	2013	0.0331549	0.0433495	0.0408158	0.057251	0.0364834	0.00269254	0.000471712	0	0.00297955	0.0344227	0.00948382	0.00559389	0.00681739	0.00664883	0.044148	0.0191106	0.0180245	0.0198823	0.025944	0.00703193	0.102493	0.122657	0.12432
Shandong	2014	0.0333421	0.0412351	0.0423435	0.0588879	0.037038	0.00274316	0.000620974	0.00038313	0.00360048	0.036234	0.00890398	0.00663713	0.00650447	0.00638308	0.0515628	0.0197417	0.0199171	0.0405323	0.0264248	0.0071848	0.143371	0.1039	0.141644
Shandong	2015	0.0333074	0.0393893	0.0428955	0.0600271	0.0415504	0.00279386	0.00101328	0.000484656	0.00306876	0.0376538	0.00871005	0.00755194	0.00636621	0.0118823	0.0558187	0.0246355	0.0236724	0.00134101	0.0265503	0.00728671	0.162342	0.11531	0.216595
Shandong	2016	0.033145	0.0374258	0.0446336	0.0439308	0.0430035	0.00287165	0.00118676	0.000586775	0.00396068	0.0367497	0.00796694	0.00844544	0.00593744	0.0133624	0.0583533	0.0240996	0.0275107	0.00316446	0.0269133	0.00743958	0.177442	0.141994	0.184164
Shandong	2017	0.0335549	0.0355533	0.0448978	0.0454992	0.043344	0.0030542	0.00177163	0.000893725	0.00363198	0.0360001	0.00729654	0.00946095	0.0059992	0.0158536	0.0596396	0.0243589	0.033215	0.0361407	0.0268919	0.00743958	0.209365	0.191184	0.175908
[truncated: 201 more rows]

## Sheet: Comprehensive Value
ID	YEAR	Total sown area of crops	Number of employees in the primary industry	Cultivated land irrigated area	Farm machinery production	Grain yield	Fertilizer application	Pesticide application	Usage of agricultural plastic films	Affected area	Agricultural, forestry, livestock, andfishery output	Proportion of primary industry added value in local gross domestic product	Per capita disposable income of rural residents	Multiple-cropping index	Insurance premium income of agricultural insurance	Investment in agricultural fixed assets	Agriculture, forestry and water expenditure	Number of agricultural patents	Expenditure on agricultural science and technology	Rural electricity consumption	Number of leading enterprises in agriculture-related sectors	coverage_breadth	usage_depth	digitization_level
[truncated: 1,174 more rows]

[truncated: 2 more sheets: Coupled Coordination Model, average]
