# Supplementary material
Source: Research Square preprint supplement (doi:10.21203/rs.3.rs-9391188/v1)
Supplement: Supplementary file 3 [file 5f6198d79363d9420a9255d6.xlsx]

## Sheet: Note
1. Index name: The Peking University Digital Financial Inclusion Index of China (PKU-DFIIC)
2. Research team: This index was produced by a research team from the Institute of Digital Finance at Peking University and Research Institute at Ant Group. HUANG Yiping, Director of the Institute of Digital Finance at Peking University, and Li Zhenhua, President of Research Institute at Ant Group serve as advisors of the research team. The members of the research team included GUO Feng, KONG Tao…
3. Index attributes: The Peking University Digital Financial Inclusion Index of China (PKU-DFIIC) involves coverage breadth, usage depth and digitization level; usage depth involves sub-indexes such as payment, credit, insurance, credit, investment, and money funds.
4. Index range: 31 provinces (and municipalities directly under the Central Government and autonomous regions, referred to as “provinces”), 337 cities at and above the prefecture level (and regions, autonomous prefectures, alliances, etc., referred to as “cities”), and about 2,800 counties (and county-level cities, banners, municipal districts, etc., referred to as “counties”). The data of some r…
5. Time span: 2011-2023 for provinces and prefecture level cities, 2014-2023 for counties.
6. Regionalism code: During the period of 2011-2023, some reforms such as “setting up cities by withdrawing regions” and “changing counties (and county-level cities) into municipal districts” are carried out in China. So, some regional names and their codes may be changed. The codes of prefecture level cities in this index retained both versions of 2014 and 2018, while the county names and their …
7. Reference recommendations: People from all walks of life are welcome to use this index. Please indicate the data source as “The Peking University Digital Financial Inclusion Index of China”.

## Sheet: Regionalism_Code
prov_name	prov_code	prov_code		pref_name_year18	pref_code_year18	pref_name_year14	pref_code_year14	pref_name_year14				county_name_year14	county_name_year14	county_name_year14
北京市	11	北京市		北京市	1100	北京市	1100	北京市				北京市	110000	北京市
天津市	12	天津市		天津市	1200	天津市	1200	天津市				东城区	110101	东城区
河北省	13	河北省		河北省	1300	河北省	1300	河北省				西城区	110102	西城区
山西省	14	山西省		石家庄市	1301	石家庄市	1301	石家庄市				朝阳区	110105	朝阳区
内蒙古自治区	15	内蒙古自治区		唐山市	1302	唐山市	1302	唐山市				丰台区	110106	丰台区
辽宁省	21	辽宁省		秦皇岛市	1303	秦皇岛市	1303	秦皇岛市				石景山区	110107	石景山区
吉林省	22	吉林省		邯郸市	1304	邯郸市	1304	邯郸市				海淀区	110108	海淀区
黑龙江省	23	黑龙江省		邢台市	1305	邢台市	1305	邢台市				门头沟区	110109	门头沟区
上海市	31	上海市		保定市	1306	保定市	1306	保定市				房山区	110111	房山区
江苏省	32	江苏省		张家口市	1307	张家口市	1307	张家口市				通州区	110112	通州区
浙江省	33	浙江省		承德市	1308	承德市	1308	承德市				顺义区	110113	顺义区
安徽省	34	安徽省		沧州市	1309	沧州市	1309	沧州市				昌平区	110114	昌平区
福建省	35	福建省		廊坊市	1310	廊坊市	1310	廊坊市				大兴区	110115	大兴区
江西省	36	江西省		衡水市	1311	衡水市	1311	衡水市				怀柔区	110116	怀柔区
山东省	37	山东省		山西省	1400	山西省	1400	山西省				平谷区	110117	平谷区
河南省	41	河南省		太原市	1401	太原市	1401	太原市				密云县	110228	密云县
湖北省	42	湖北省		大同市	1402	大同市	1402	大同市				延庆县	110229	延庆县
湖南省	43	湖南省		阳泉市	1403	阳泉市	1403	阳泉市				天津市	120000	天津市
广东省	44	广东省		长治市	1404	长治市	1404	长治市				和平区	120101	和平区
广西壮族自治区	45	广西壮族自治区		晋城市	1405	晋城市	1405	晋城市				河东区	120102	河东区
海南省	46	海南省		朔州市	1406	朔州市	1406	朔州市				河西区	120103	河西区
重庆市	50	重庆市		晋中市	1407	晋中市	1407	晋中市				南开区	120104	南开区
四川省	51	四川省		运城市	1408	运城市	1408	运城市				河北区	120105	河北区
贵州省	52	贵州省		忻州市	1409	忻州市	1409	忻州市				红桥区	120106	红桥区
云南省	53	云南省		临汾市	1410	临汾市	1410	临汾市				东丽区	120110	东丽区
西藏自治区	54	西藏自治区		吕梁市	1411	吕梁市	1411	吕梁市				西青区	120111	西青区
陕西省	61	陕西省		内蒙古自治区	1500	内蒙古自治区	1500	内蒙古自治区				津南区	120112	津南区
甘肃省	62	甘肃省		呼和浩特市	1501	呼和浩特市	1501	呼和浩特市				北辰区	120113	北辰区
青海省	63	青海省		包头市	1502	包头市	1502	包头市				武清区	120114	武清区
宁夏回族自治区	64	宁夏回族自治区		乌海市	1503	乌海市	1503	乌海市				宝坻区	120115	宝坻区
新疆维吾尔自治区	65	新疆维吾尔自治区		赤峰市	1504	赤峰市	1504	赤峰市				滨海新区	120116	滨海新区
				通辽市	1505	通辽市	1505	通辽市				宁河县	120221	宁河县
				鄂尔多斯市	1506	鄂尔多斯市	1506	鄂尔多斯市				静海县	120223	静海县
				呼伦贝尔市	1507	呼伦贝尔市	1507	呼伦贝尔市				蓟县	120225	蓟县
				巴彦淖尔市	1508	巴彦淖尔市	1508	巴彦淖尔市				河北省	130000	河北省
				乌兰察布市	1509	乌兰察布市	1509	乌兰察布市				石家庄市	130100	石家庄市
				兴安盟	1522	兴安盟	1522	兴安盟				长安区	130102	长安区
				锡林郭勒盟	1525	锡林郭勒盟	1525	锡林郭勒盟				桥东区	130103	桥东区
				阿拉善盟	1529	阿拉善盟	1529	阿拉善盟				桥西区	130104	桥西区
				辽宁省	2100	辽宁省	2100	辽宁省				新华区	130105	新华区
				沈阳市	2101	沈阳市	2101	沈阳市				井陉矿区	130107	井陉矿区
				大连市	2102	大连市	2102	大连市				裕华区	130108	裕华区
				鞍山市	2103	鞍山市	2103	鞍山市				藁城区	130109	藁城区
				抚顺市	2104	抚顺市	2104	抚顺市				鹿泉区	130110	鹿泉区
				本溪市	2105	本溪市	2105	本溪市				栾城区	130111	栾城区
				丹东市	2106	丹东市	2106	丹东市				井陉县	130121	井陉县
				锦州市	2107	锦州市	2107	锦州市				正定县	130123	正定县
				营口市	2108	营口市	2108	营口市				行唐县	130125	行唐县
				阜新市	2109	阜新市	2109	阜新市				灵寿县	130126	灵寿县
				辽阳市	2110	辽阳市	2110	辽阳市				高邑县	130127	高邑县
				盘锦市	2111	盘锦市	2111	盘锦市				深泽县	130128	深泽县
				铁岭市	2112	铁岭市	2112	铁岭市				赞皇县	130129	赞皇县
				朝阳市	2113	朝阳市	2113	朝阳市				无极县	130130	无极县
				葫芦岛市	2114	葫芦岛市	2114	葫芦岛市				平山县	130131	平山县
				吉林省	2200	吉林省	2200	吉林省				元氏县	130132	元氏县
				长春市	2201	长春市	2201	长春市				赵县	130133	赵县
				吉林市	2202	吉林市	2202	吉林市				辛集市	130181	辛集市
				四平市	2203	四平市	2203	四平市				晋州市	130183	晋州市
				辽源市	2204	辽源市	2204	辽源市				新乐市	130184	新乐市
				通化市	2205	通化市	2205	通化市				唐山市	130200	唐山市
				白山市	2206	白山市	2206	白山市				路南区	130202	路南区
				松原市	2207	松原市	2207	松原市				路北区	130203	路北区
				白城市	2208	白城市	2208	白城市				古冶区	130204	古冶区
				延边朝鲜族自治州	2224	延边朝鲜族自治州	2224	延边朝鲜族自治州				开平区	130205	开平区
				黑龙江省	2300	黑龙江省	2300	黑龙江省				丰南区	130207	丰南区
				哈尔滨市	2301	哈尔滨市	2301	哈尔滨市				丰润区	130208	丰润区
				齐齐哈尔市	2302	齐齐哈尔市	2302	齐齐哈尔市				曹妃甸区	130209	曹妃甸区
				鸡西市	2303	鸡西市	2303	鸡西市				滦县	130223	滦县
				鹤岗市	2304	鹤岗市	2304	鹤岗市				滦南县	130224	滦南县
				双鸭山市	2305	双鸭山市	2305	双鸭山市				乐亭县	130225	乐亭县
				大庆市	2306	大庆市	2306	大庆市				迁西县	130227	迁西县
				伊春市	2307	伊春市	2307	伊春市				玉田县	130229	玉田县
				佳木斯市	2308	佳木斯市	2308	佳木斯市				遵化市	130281	遵化市
				七台河市	2309	七台河市	2309	七台河市				迁安市	130283	迁安市
				牡丹江市	2310	牡丹江市	2310	牡丹江市				秦皇岛市	130300	秦皇岛市
				黑河市	2311	黑河市	2311	黑河市				海港区	130302	海港区
				绥化市	2312	绥化市	2312	绥化市				山海关区	130303	山海关区
				大兴安岭地区	2327	大兴安岭地区	2327	大兴安岭地区				北戴河区	130304	北戴河区
				上海市	3100	上海市	3100	上海市				青龙满族自治县	130321	青龙满族自治县
				江苏省	3200	江苏省	3200	江苏省				昌黎县	130322	昌黎县
				南京市	3201	南京市	3201	南京市				抚宁县	130323	抚宁县
				无锡市	3202	无锡市	3202	无锡市				卢龙县	130324	卢龙县
				徐州市	3203	徐州市	3203	徐州市				邯郸市	130400	邯郸市
				常州市	3204	常州市	3204	常州市				邯山区	130402	邯山区
				苏州市	3205	苏州市	3205	苏州市				丛台区	130403	丛台区
				南通市	3206	南通市	3206	南通市				复兴区	130404	复兴区
				连云港市	3207	连云港市	3207	连云港市				峰峰矿区	130406	峰峰矿区
				淮安市	3208	淮安市	3208	淮安市				邯郸县	130421	邯郸县
				盐城市	3209	盐城市	3209	盐城市				临漳县	130423	临漳县
				扬州市	3210	扬州市	3210	扬州市				成安县	130424	成安县
				镇江市	3211	镇江市	3211	镇江市				大名县	130425	大名县
				泰州市	3212	泰州市	3212	泰州市				涉县	130426	涉县
				宿迁市	3213	宿迁市	3213	宿迁市				磁县	130427	磁县
				浙江省	3300	浙江省	3300	浙江省				肥乡县	130428	肥乡县
				杭州市	3301	杭州市	3301	杭州市				永年县	130429	永年县
				宁波市	3302	宁波市	3302	宁波市				邱县	130430	邱县
				温州市	3303	温州市	3303	温州市				鸡泽县	130431	鸡泽县
				嘉兴市	3304	嘉兴市	3304	嘉兴市				广平县	130432	广平县
				湖州市	3305	湖州市	3305	湖州市				馆陶县	130433	馆陶县
				绍兴市	3306	绍兴市	3306	绍兴市				魏县	130434	魏县
				金华市	3307	金华市	3307	金华市				曲周县	130435	曲周县
				衢州市	3308	衢州市	3308	衢州市				武安市	130481	武安市
				舟山市	3309	舟山市	3309	舟山市				邢台市	130500	邢台市
				台州市	3310	台州市	3310	台州市				桥东区	130502	桥东区
				丽水市	3311	丽水市	3311	丽水市				桥西区	130503	桥西区
				安徽省	3400	安徽省	3400	安徽省				邢台县	130521	邢台县
				合肥市	3401	合肥市	3401	合肥市				临城县	130522	临城县
				芜湖市	3402	芜湖市	3402	芜湖市				内丘县	130523	内丘县
				蚌埠市	3403	蚌埠市	3403	蚌埠市				柏乡县	130524	柏乡县
				淮南市	3404	淮南市	3404	淮南市				隆尧县	130525	隆尧县
				马鞍山市	3405	马鞍山市	3405	马鞍山市				任县	130526	任县
				淮北市	3406	淮北市	3406	淮北市				南和县	130527	南和县
				铜陵市	3407	铜陵市	3407	铜陵市				宁晋县	130528	宁晋县
				安庆市	3408	安庆市	3408	安庆市				巨鹿县	130529	巨鹿县
				黄山市	3410	黄山市	3410	黄山市				新河县	130530	新河县
				滁州市	3411	滁州市	3411	滁州市				广宗县	130531	广宗县
				阜阳市	3412	阜阳市	3412	阜阳市				平乡县	130532	平乡县
				宿州市	3413	宿州市	3413	宿州市				威县	130533	威县
				六安市	3415	六安市	3415	六安市				清河县	130534	清河县
				亳州市	3416	亳州市	3416	亳州市				临西县	130535	临西县
				池州市	3417	池州市	3417	池州市				南宫市	130581	南宫市
				宣城市	3418	宣城市	3418	宣城市				沙河市	130582	沙河市
				福建省	3500	福建省	3500	福建省				保定市	130600	保定市
				福州市	3501	福州市	3501	福州市				新市区	130602	新市区
				厦门市	3502	厦门市	3502	厦门市				北市区	130603	北市区
				莆田市	3503	莆田市	3503	莆田市				南市区	130604	南市区
				三明市	3504	三明市	3504	三明市				满城县	130621	满城县
				泉州市	3505	泉州市	3505	泉州市				清苑县	130622	清苑县
				漳州市	3506	漳州市	3506	漳州市				涞水县	130623	涞水县
				南平市	3507	南平市	3507	南平市				阜平县	130624	阜平县
				龙岩市	3508	龙岩市	3508	龙岩市				徐水县	130625	徐水县
				宁德市	3509	宁德市	3509	宁德市				定兴县	130626	定兴县
				江西省	3600	江西省	3600	江西省				唐县	130627	唐县
				南昌市	3601	南昌市	3601	南昌市				高阳县	130628	高阳县
				景德镇市	3602	景德镇市	3602	景德镇市				容城县	130629	容城县
				萍乡市	3603	萍乡市	3603	萍乡市				涞源县	130630	涞源县
				九江市	3604	九江市	3604	九江市				望都县	130631	望都县
				新余市	3605	新余市	3605	新余市				安新县	130632	安新县
				鹰潭市	3606	鹰潭市	3606	鹰潭市				易县	130633	易县
				赣州市	3607	赣州市	3607	赣州市				曲阳县	130634	曲阳县
				吉安市	3608	吉安市	3608	吉安市				蠡县	130635	蠡县
				宜春市	3609	宜春市	3609	宜春市				顺平县	130636	顺平县
				抚州市	3610	抚州市	3610	抚州市				博野县	130637	博野县
				上饶市	3611	上饶市	3611	上饶市				雄县	130638	雄县
				山东省	3700	山东省	3700	山东省				涿州市	130681	涿州市
				济南市	3701	济南市	3701	济南市				定州市	130682	定州市
				青岛市	3702	青岛市	3702	青岛市				安国市	130683	安国市
				淄博市	3703	淄博市	3703	淄博市				高碑店市	130684	高碑店市
				枣庄市	3704	枣庄市	3704	枣庄市				张家口市	130700	张家口市
				东营市	3705	东营市	3705	东营市				桥东区	130702	桥东区
				烟台市	3706	烟台市	3706	烟台市				桥西区	130703	桥西区
				潍坊市	3707	潍坊市	3707	潍坊市				宣化区	130705	宣化区
				济宁市	3708	济宁市	3708	济宁市				下花园区	130706	下花园区
				泰安市	3709	泰安市	3709	泰安市				宣化县	130721	宣化县
				威海市	3710	威海市	3710	威海市				张北县	130722	张北县
				日照市	3711	日照市	3711	日照市				康保县	130723	康保县
				莱芜市	3712	莱芜市	3712	莱芜市				沽源县	130724	沽源县
				临沂市	3713	临沂市	3713	临沂市				尚义县	130725	尚义县
				德州市	3714	德州市	3714	德州市				蔚县	130726	蔚县
				聊城市	3715	聊城市	3715	聊城市				阳原县	130727	阳原县
				滨州市	3716	滨州市	3716	滨州市				怀安县	130728	怀安县
				菏泽市	3717	菏泽市	3717	菏泽市				万全县	130729	万全县
				河南省	4100	河南省	4100	河南省				怀来县	130730	怀来县
				郑州市	4101	郑州市	4101	郑州市				涿鹿县	130731	涿鹿县
				开封市	4102	开封市	4102	开封市				赤城县	130732	赤城县
				洛阳市	4103	洛阳市	4103	洛阳市				崇礼县	130733	崇礼县
				平顶山市	4104	平顶山市	4104	平顶山市				承德市	130800	承德市
				安阳市	4105	安阳市	4105	安阳市				双桥区	130802	双桥区
				鹤壁市	4106	鹤壁市	4106	鹤壁市				双滦区	130803	双滦区
				新乡市	4107	新乡市	4107	新乡市				鹰手营子矿区	130804	鹰手营子矿区
				焦作市	4108	焦作市	4108	焦作市				承德县	130821	承德县
				濮阳市	4109	濮阳市	4109	濮阳市				兴隆县	130822	兴隆县
				许昌市	4110	许昌市	4110	许昌市				平泉县	130823	平泉县
				漯河市	4111	漯河市	4111	漯河市				滦平县	130824	滦平县
				三门峡市	4112	三门峡市	4112	三门峡市				隆化县	130825	隆化县
				南阳市	4113	南阳市	4113	南阳市				丰宁满族自治县	130826	丰宁满族自治县
				商丘市	4114	商丘市	4114	商丘市				宽城满族自治县	130827	宽城满族自治县
				信阳市	4115	信阳市	4115	信阳市				围场满族蒙古族自治县	130828	围场满族蒙古族自治县
				周口市	4116	周口市	4116	周口市				沧州市	130900	沧州市
				驻马店市	4117	驻马店市	4117	驻马店市				新华区	130902	新华区
				湖北省	4200	湖北省	4200	湖北省				运河区	130903	运河区
				武汉市	4201	武汉市	4201	武汉市				沧县	130921	沧县
				黄石市	4202	黄石市	4202	黄石市				青县	130922	青县
				十堰市	4203	十堰市	4203	十堰市				东光县	130923	东光县
				宜昌市	4205	宜昌市	4205	宜昌市				海兴县	130924	海兴县
				襄阳市	4206	襄阳市	4206	襄阳市				盐山县	130925	盐山县
				鄂州市	4207	鄂州市	4207	鄂州市				肃宁县	130926	肃宁县
				荆门市	4208	荆门市	4208	荆门市				南皮县	130927	南皮县
				孝感市	4209	孝感市	4209	孝感市				吴桥县	130928	吴桥县
				荆州市	4210	荆州市	4210	荆州市				献县	130929	献县
				黄冈市	4211	黄冈市	4211	黄冈市				孟村回族自治县	130930	孟村回族自治县
				咸宁市	4212	咸宁市	4212	咸宁市				泊头市	130981	泊头市
				随州市	4213	随州市	4213	随州市				任丘市	130982	任丘市
				恩施土家族苗族自治州	4228	恩施土家族苗族自治州	4228	恩施土家族苗族自治州				黄骅市	130983	黄骅市
				湖南省	4300	湖南省	4300	湖南省				河间市	130984	河间市
				长沙市	4301	长沙市	4301	长沙市				廊坊市	131000	廊坊市
				株洲市	4302	株洲市	4302	株洲市				安次区	131002	安次区
				湘潭市	4303	湘潭市	4303	湘潭市				广阳区	131003	广阳区
				衡阳市	4304	衡阳市	4304	衡阳市				固安县	131022	固安县
				邵阳市	4305	邵阳市	4305	邵阳市				永清县	131023	永清县
				岳阳市	4306	岳阳市	4306	岳阳市				香河县	131024	香河县
				常德市	4307	常德市	4307	常德市				大城县	131025	大城县
				张家界市	4308	张家界市	4308	张家界市				文安县	131026	文安县
				益阳市	4309	益阳市	4309	益阳市				大厂回族自治县	131028	大厂回族自治县
				郴州市	4310	郴州市	4310	郴州市				霸州市	131081	霸州市
				永州市	4311	永州市	4311	永州市				三河市	131082	三河市
				怀化市	4312	怀化市	4312	怀化市				衡水市	131100	衡水市
				娄底市	4313	娄底市	4313	娄底市				桃城区	131102	桃城区
				湘西土家族苗族自治州	4331	湘西土家族苗族自治州	4331	湘西土家族苗族自治州				枣强县	131121	枣强县
				广东省	4400	广东省	4400	广东省				武邑县	131122	武邑县
				广州市	4401	广州市	4401	广州市				武强县	131123	武强县
				韶关市	4402	韶关市	4402	韶关市				饶阳县	131124	饶阳县
				深圳市	4403	深圳市	4403	深圳市				安平县	131125	安平县
				珠海市	4404	珠海市	4404	珠海市				故城县	131126	故城县
				汕头市	4405	汕头市	4405	汕头市				景县	131127	景县
				佛山市	4406	佛山市	4406	佛山市				阜城县	131128	阜城县
				江门市	4407	江门市	4407	江门市				冀州市	131181	冀州市
				湛江市	4408	湛江市	4408	湛江市				深州市	131182	深州市
				茂名市	4409	茂名市	4409	茂名市				山西省	140000	山西省
				肇庆市	4412	肇庆市	4412	肇庆市				太原市	140100	太原市
				惠州市	4413	惠州市	4413	惠州市				小店区	140105	小店区
				梅州市	4414	梅州市	4414	梅州市				迎泽区	140106	迎泽区
				汕尾市	4415	汕尾市	4415	汕尾市				杏花岭区	140107	杏花岭区
				河源市	4416	河源市	4416	河源市				尖草坪区	140108	尖草坪区
				阳江市	4417	阳江市	4417	阳江市				万柏林区	140109	万柏林区
				清远市	4418	清远市	4418	清远市				晋源区	140110	晋源区
				东莞市	4419	东莞市	4419	东莞市				清徐县	140121	清徐县
				中山市	4420	中山市	4420	中山市				阳曲县	140122	阳曲县
				潮州市	4451	潮州市	4451	潮州市				娄烦县	140123	娄烦县
				揭阳市	4452	揭阳市	4452	揭阳市				古交市	140181	古交市
				云浮市	4453	云浮市	4453	云浮市				大同市	140200	大同市
				广西壮族自治区	4500	广西壮族自治区	4500	广西壮族自治区				城区	140202	城区
				南宁市	4501	南宁市	4501	南宁市				矿区	140203	矿区
				柳州市	4502	柳州市	4502	柳州市				南郊区	140211	南郊区
				桂林市	4503	桂林市	4503	桂林市				新荣区	140212	新荣区
				梧州市	4504	梧州市	4504	梧州市				阳高县	140221	阳高县
				北海市	4505	北海市	4505	北海市				天镇县	140222	天镇县
				防城港市	4506	防城港市	4506	防城港市				广灵县	140223	广灵县
				钦州市	4507	钦州市	4507	钦州市				灵丘县	140224	灵丘县
				贵港市	4508	贵港市	4508	贵港市				浑源县	140225	浑源县
				玉林市	4509	玉林市	4509	玉林市				左云县	140226	左云县
				百色市	4510	百色市	4510	百色市				大同县	140227	大同县
				贺州市	4511	贺州市	4511	贺州市				阳泉市	140300	阳泉市
				河池市	4512	河池市	4512	河池市				城区	140302	城区
				来宾市	4513	来宾市	4513	来宾市				矿区	140303	矿区
				崇左市	4514	崇左市	4514	崇左市				郊区	140311	郊区
				海南省	4600	海南省	4600	海南省				平定县	140321	平定县
				海口市	4601	海口市	4601	海口市				盂县	140322	盂县
				三亚市	4602	三亚市	4602	三亚市				长治市	140400	长治市
				三沙市	4603	三沙市	4603	三沙市				城区	140402	城区
				儋州市	4604	儋州市	4604	儋州市				郊区	140411	郊区
				重庆市	5000	重庆市	5000	重庆市				长治县	140421	长治县
				四川省	5100	四川省	5100	四川省				襄垣县	140423	襄垣县
				成都市	5101	成都市	5101	成都市				屯留县	140424	屯留县
				自贡市	5103	自贡市	5103	自贡市				平顺县	140425	平顺县
				攀枝花市	5104	攀枝花市	5104	攀枝花市				黎城县	140426	黎城县
				泸州市	5105	泸州市	5105	泸州市				壶关县	140427	壶关县
				德阳市	5106	德阳市	5106	德阳市				长子县	140428	长子县
				绵阳市	5107	绵阳市	5107	绵阳市				武乡县	140429	武乡县
				广元市	5108	广元市	5108	广元市				沁县	140430	沁县
				遂宁市	5109	遂宁市	5109	遂宁市				沁源县	140431	沁源县
				内江市	5110	内江市	5110	内江市				潞城市	140481	潞城市
				乐山市	5111	乐山市	5111	乐山市				晋城市	140500	晋城市
				南充市	5113	南充市	5113	南充市				城区	140502	城区
				眉山市	5114	眉山市	5114	眉山市				沁水县	140521	沁水县
				宜宾市	5115	宜宾市	5115	宜宾市				阳城县	140522	阳城县
				广安市	5116	广安市	5116	广安市				陵川县	140524	陵川县
				达州市	5117	达州市	5117	达州市				泽州县	140525	泽州县
				雅安市	5118	雅安市	5118	雅安市				高平市	140581	高平市
				巴中市	5119	巴中市	5119	巴中市				朔州市	140600	朔州市
				资阳市	5120	资阳市	5120	资阳市				朔城区	140602	朔城区
				阿坝藏族羌族自治州	5132	阿坝藏族羌族自治州	5132	阿坝藏族羌族自治州				平鲁区	140603	平鲁区
				甘孜藏族自治州	5133	甘孜藏族自治州	5133	甘孜藏族自治州				山阴县	140621	山阴县
				凉山彝族自治州	5134	凉山彝族自治州	5134	凉山彝族自治州				应县	140622	应县
				贵州省	5200	贵州省	5200	贵州省				右玉县	140623	右玉县
				贵阳市	5201	贵阳市	5201	贵阳市				怀仁县	140624	怀仁县
				六盘水市	5202	六盘水市	5202	六盘水市				晋中市	140700	晋中市
				遵义市	5203	遵义市	5203	遵义市				榆次区	140702	榆次区
				安顺市	5204	安顺市	5204	安顺市				榆社县	140721	榆社县
				毕节市	5205	毕节市	5205	毕节市				左权县	140722	左权县
				铜仁市	5206	铜仁市	5206	铜仁市				和顺县	140723	和顺县
				黔西南布依族苗族自治州	5223	黔西南布依族苗族自治州	5223	黔西南布依族苗族自治州				昔阳县	140724	昔阳县
				黔东南苗族侗族自治州	5226	黔东南苗族侗族自治州	5226	黔东南苗族侗族自治州				寿阳县	140725	寿阳县
				黔南布依族苗族自治州	5227	黔南布依族苗族自治州	5227	黔南布依族苗族自治州				太谷县	140726	太谷县
				云南省	5300	云南省	5300	云南省				祁县	140727	祁县
				昆明市	5301	昆明市	5301	昆明市				平遥县	140728	平遥县
				曲靖市	5303	曲靖市	5303	曲靖市				灵石县	140729	灵石县
				玉溪市	5304	玉溪市	5304	玉溪市				介休市	140781	介休市
				保山市	5305	保山市	5305	保山市				运城市	140800	运城市
				昭通市	5306	昭通市	5306	昭通市				盐湖区	140802	盐湖区
				丽江市	5307	丽江市	5307	丽江市				临猗县	140821	临猗县
				普洱市	5308	普洱市	5308	普洱市				万荣县	140822	万荣县
				临沧市	5309	临沧市	5309	临沧市				闻喜县	140823	闻喜县
				楚雄彝族自治州	5323	楚雄彝族自治州	5323	楚雄彝族自治州				稷山县	140824	稷山县
				红河哈尼族彝族自治州	5325	红河哈尼族彝族自治州	5325	红河哈尼族彝族自治州				新绛县	140825	新绛县
				文山壮族苗族自治州	5326	文山壮族苗族自治州	5326	文山壮族苗族自治州				绛县	140826	绛县
				西双版纳傣族自治州	5328	西双版纳傣族自治州	5328	西双版纳傣族自治州				垣曲县	140827	垣曲县
				大理白族自治州	5329	大理白族自治州	5329	大理白族自治州				夏县	140828	夏县
				德宏傣族景颇族自治州	5331	德宏傣族景颇族自治州	5331	德宏傣族景颇族自治州				平陆县	140829	平陆县
				怒江傈僳族自治州	5333	怒江傈僳族自治州	5333	怒江傈僳族自治州				芮城县	140830	芮城县
				迪庆藏族自治州	5334	迪庆藏族自治州	5334	迪庆藏族自治州				永济市	140881	永济市
				西藏自治区	5400	西藏自治区	5400	西藏自治区				河津市	140882	河津市
				拉萨市	5401	拉萨市	5401	拉萨市				忻州市	140900	忻州市
				日喀则市	5402	日喀则市	5402	日喀则市				忻府区	140902	忻府区
				昌都市	5403	昌都市	5403	昌都市				定襄县	140921	定襄县
				林芝市	5404	林芝地区	5426	林芝地区				五台县	140922	五台县
				山南市	5405	山南地区	5422	山南地区				代县	140923	代县
				那曲市	5406	那曲地区	5424	那曲地区				繁峙县	140924	繁峙县
				阿里地区	5425	阿里地区	5425	阿里地区				宁武县	140925	宁武县
				陕西省	6100	陕西省	6100	陕西省				静乐县	140926	静乐县
				西安市	6101	西安市	6101	西安市				神池县	140927	神池县
				铜川市	6102	铜川市	6102	铜川市				五寨县	140928	五寨县
				宝鸡市	6103	宝鸡市	6103	宝鸡市				岢岚县	140929	岢岚县
				咸阳市	6104	咸阳市	6104	咸阳市				河曲县	140930	河曲县
				渭南市	6105	渭南市	6105	渭南市				保德县	140931	保德县
				延安市	6106	延安市	6106	延安市				偏关县	140932	偏关县
				汉中市	6107	汉中市	6107	汉中市				原平市	140981	原平市
				榆林市	6108	榆林市	6108	榆林市				临汾市	141000	临汾市
				安康市	6109	安康市	6109	安康市				尧都区	141002	尧都区
				商洛市	6110	商洛市	6110	商洛市				曲沃县	141021	曲沃县
				甘肃省	6200	甘肃省	6200	甘肃省				翼城县	141022	翼城县
				兰州市	6201	兰州市	6201	兰州市				襄汾县	141023	襄汾县
				嘉峪关市	6202	嘉峪关市	6202	嘉峪关市				洪洞县	141024	洪洞县
				金昌市	6203	金昌市	6203	金昌市				古县	141025	古县
				白银市	6204	白银市	6204	白银市				安泽县	141026	安泽县
				天水市	6205	天水市	6205	天水市				浮山县	141027	浮山县
				武威市	6206	武威市	6206	武威市				吉县	141028	吉县
				张掖市	6207	张掖市	6207	张掖市				乡宁县	141029	乡宁县
				平凉市	6208	平凉市	6208	平凉市				大宁县	141030	大宁县
				酒泉市	6209	酒泉市	6209	酒泉市				隰县	141031	隰县
				庆阳市	6210	庆阳市	6210	庆阳市				永和县	141032	永和县
				定西市	6211	定西市	6211	定西市				蒲县	141033	蒲县
				陇南市	6212	陇南市	6212	陇南市				汾西县	141034	汾西县
				临夏回族自治州	6229	临夏回族自治州	6229	临夏回族自治州				侯马市	141081	侯马市
				甘南藏族自治州	6230	甘南藏族自治州	6230	甘南藏族自治州				霍州市	141082	霍州市
				青海省	6300	青海省	6300	青海省				吕梁市	141100	吕梁市
				西宁市	6301	西宁市	6301	西宁市				离石区	141102	离石区
				海东市	6302	海东市	6302	海东市				文水县	141121	文水县
				海北藏族自治州	6322	海北藏族自治州	6322	海北藏族自治州				交城县	141122	交城县
				黄南藏族自治州	6323	黄南藏族自治州	6323	黄南藏族自治州				兴县	141123	兴县
				海南藏族自治州	6325	海南藏族自治州	6325	海南藏族自治州				临县	141124	临县
				果洛藏族自治州	6326	果洛藏族自治州	6326	果洛藏族自治州				柳林县	141125	柳林县
				玉树藏族自治州	6327	玉树藏族自治州	6327	玉树藏族自治州				石楼县	141126	石楼县
				海西蒙古族藏族自治州	6328	海西蒙古族藏族自治州	6328	海西蒙古族藏族自治州				岚县	141127	岚县
				宁夏回族自治区	6400	宁夏回族自治区	6400	宁夏回族自治区				方山县	141128	方山县
				银川市	6401	银川市	6401	银川市				中阳县	141129	中阳县
				石嘴山市	6402	石嘴山市	6402	石嘴山市				交口县	141130	交口县
				吴忠市	6403	吴忠市	6403	吴忠市				孝义市	141181	孝义市
				固原市	6404	固原市	6404	固原市				汾阳市	141182	汾阳市
				中卫市	6405	中卫市	6405	中卫市				内蒙古自治区	150000	内蒙古自治区
				新疆维吾尔自治区	6500	新疆维吾尔自治区	6500	新疆维吾尔自治区				呼和浩特市	150100	呼和浩特市
				乌鲁木齐市	6501	乌鲁木齐市	6501	乌鲁木齐市				新城区	150102	新城区
				克拉玛依市	6502	克拉玛依市	6502	克拉玛依市				回民区	150103	回民区
				吐鲁番市	6504	吐鲁番地区	6521	吐鲁番地区				玉泉区	150104	玉泉区
				哈密市	6505	哈密地区	6522	哈密地区				赛罕区	150105	赛罕区
				昌吉回族自治州	6523	昌吉回族自治州	6523	昌吉回族自治州				土默特左旗	150121	土默特左旗
				博尔塔拉蒙古自治州	6527	博尔塔拉蒙古自治州	6527	博尔塔拉蒙古自治州				托克托县	150122	托克托县
				巴音郭楞蒙古自治州	6528	巴音郭楞蒙古自治州	6528	巴音郭楞蒙古自治州				和林格尔县	150123	和林格尔县
				阿克苏地区	6529	阿克苏地区	6529	阿克苏地区				清水河县	150124	清水河县
				克孜勒苏柯尔克孜自治州	6530	克孜勒苏柯尔克孜自治州	6530	克孜勒苏柯尔克孜自治州				武川县	150125	武川县
				喀什地区	6531	喀什地区	6531	喀什地区				包头市	150200	包头市
				和田地区	6532	和田地区	6532	和田地区				东河区	150202	东河区
				伊犁哈萨克自治州	6540	伊犁哈萨克自治州	6540	伊犁哈萨克自治州				昆都仑区	150203	昆都仑区
				塔城地区	6542	塔城地区	6542	塔城地区				青山区	150204	青山区
				阿勒泰地区	6543	阿勒泰地区	6543	阿勒泰地区				石拐区	150205	石拐区
												白云鄂博矿区	150206	白云鄂博矿区
												九原区	150207	九原区
												土默特右旗	150221	土默特右旗
												固阳县	150222	固阳县
												达尔罕茂明安联合旗	150223	达尔罕茂明安联合旗
												乌海市	150300	乌海市
												海勃湾区	150302	海勃湾区
												海南区	150303	海南区
												乌达区	150304	乌达区
												赤峰市	150400	赤峰市
												红山区	150402	红山区
												元宝山区	150403	元宝山区
												松山区	150404	松山区
												阿鲁科尔沁旗	150421	阿鲁科尔沁旗
												巴林左旗	150422	巴林左旗
												巴林右旗	150423	巴林右旗
												林西县	150424	林西县
												克什克腾旗	150425	克什克腾旗
												翁牛特旗	150426	翁牛特旗
												喀喇沁旗	150428	喀喇沁旗
												宁城县	150429	宁城县
												敖汉旗	150430	敖汉旗
												通辽市	150500	通辽市
												科尔沁区	150502	科尔沁区
												科尔沁左翼中旗	150521	科尔沁左翼中旗
												科尔沁左翼后旗	150522	科尔沁左翼后旗
												开鲁县	150523	开鲁县
												库伦旗	150524	库伦旗
												奈曼旗	150525	奈曼旗
												扎鲁特旗	150526	扎鲁特旗
												霍林郭勒市	150581	霍林郭勒市
												鄂尔多斯市	150600	鄂尔多斯市
												东胜区	150602	东胜区
												达拉特旗	150621	达拉特旗
												准格尔旗	150622	准格尔旗
												鄂托克前旗	150623	鄂托克前旗
												鄂托克旗	150624	鄂托克旗
												杭锦旗	150625	杭锦旗
												乌审旗	150626	乌审旗
												伊金霍洛旗	150627	伊金霍洛旗
												呼伦贝尔市	150700	呼伦贝尔市
												海拉尔区	150702	海拉尔区
												扎赉诺尔区	150703	扎赉诺尔区
												阿荣旗	150721	阿荣旗
												莫力达瓦达斡尔族自治旗	150722	莫力达瓦达斡尔族自治旗
												鄂伦春自治旗	150723	鄂伦春自治旗
												鄂温克族自治旗	150724	鄂温克族自治旗
												陈巴尔虎旗	150725	陈巴尔虎旗
												新巴尔虎左旗	150726	新巴尔虎左旗
												新巴尔虎右旗	150727	新巴尔虎右旗
												满洲里市	150781	满洲里市
												牙克石市	150782	牙克石市
												扎兰屯市	150783	扎兰屯市
												额尔古纳市	150784	额尔古纳市
												根河市	150785	根河市
												巴彦淖尔市	150800	巴彦淖尔市
												临河区	150802	临河区
												五原县	150821	五原县
												磴口县	150822	磴口县
												乌拉特前旗	150823	乌拉特前旗
												乌拉特中旗	150824	乌拉特中旗
												乌拉特后旗	150825	乌拉特后旗
												杭锦后旗	150826	杭锦后旗
												乌兰察布市	150900	乌兰察布市
												集宁区	150902	集宁区
												卓资县	150921	卓资县
												化德县	150922	化德县
												商都县	150923	商都县
												兴和县	150924	兴和县
												凉城县	150925	凉城县
												察哈尔右翼前旗	150926	察哈尔右翼前旗
												察哈尔右翼中旗	150927	察哈尔右翼中旗
												察哈尔右翼后旗	150928	察哈尔右翼后旗
												四子王旗	150929	四子王旗
												丰镇市	150981	丰镇市
												兴安盟	152200	兴安盟
												乌兰浩特市	152201	乌兰浩特市
												阿尔山市	152202	阿尔山市
												科尔沁右翼前旗	152221	科尔沁右翼前旗
												科尔沁右翼中旗	152222	科尔沁右翼中旗
												扎赉特旗	152223	扎赉特旗
												突泉县	152224	突泉县
												锡林郭勒盟	152500	锡林郭勒盟
												二连浩特市	152501	二连浩特市
												锡林浩特市	152502	锡林浩特市
												阿巴嘎旗	152522	阿巴嘎旗
												苏尼特左旗	152523	苏尼特左旗
												苏尼特右旗	152524	苏尼特右旗
												东乌珠穆沁旗	152525	东乌珠穆沁旗
												西乌珠穆沁旗	152526	西乌珠穆沁旗
												太仆寺旗	152527	太仆寺旗
												镶黄旗	152528	镶黄旗
												正镶白旗	152529	正镶白旗
												正蓝旗	152530	正蓝旗
												多伦县	152531	多伦县
												阿拉善盟	152900	阿拉善盟
												阿拉善左旗	152921	阿拉善左旗
												阿拉善右旗	152922	阿拉善右旗
												额济纳旗	152923	额济纳旗
												辽宁省	210000	辽宁省
												沈阳市	210100	沈阳市
												和平区	210102	和平区
												沈河区	210103	沈河区
												大东区	210104	大东区
												皇姑区	210105	皇姑区
												铁西区	210106	铁西区
												苏家屯区	210111	苏家屯区
												浑南区	210112	浑南区
												沈北新区	210113	沈北新区
												于洪区	210114	于洪区
												辽中县	210122	辽中县
												康平县	210123	康平县
												法库县	210124	法库县
												新民市	210181	新民市
												大连市	210200	大连市
												中山区	210202	中山区
												西岗区	210203	西岗区
												沙河口区	210204	沙河口区
												甘井子区	210211	甘井子区
												旅顺口区	210212	旅顺口区
												金州区	210213	金州区
												长海县	210224	长海县
												瓦房店市	210281	瓦房店市
												普兰店市	210282	普兰店市
												庄河市	210283	庄河市
												鞍山市	210300	鞍山市
												铁东区	210302	铁东区
												铁西区	210303	铁西区
												立山区	210304	立山区
												千山区	210311	千山区
												台安县	210321	台安县
												岫岩满族自治县	210323	岫岩满族自治县
												海城市	210381	海城市
												抚顺市	210400	抚顺市
												新抚区	210402	新抚区
												东洲区	210403	东洲区
												望花区	210404	望花区
												顺城区	210411	顺城区
												抚顺县	210421	抚顺县
												新宾满族自治县	210422	新宾满族自治县
												清原满族自治县	210423	清原满族自治县
												本溪市	210500	本溪市
												平山区	210502	平山区
												溪湖区	210503	溪湖区
												明山区	210504	明山区
												南芬区	210505	南芬区
												本溪满族自治县	210521	本溪满族自治县
												桓仁满族自治县	210522	桓仁满族自治县
												丹东市	210600	丹东市
												元宝区	210602	元宝区
												振兴区	210603	振兴区
												振安区	210604	振安区
												宽甸满族自治县	210624	宽甸满族自治县
												东港市	210681	东港市
												凤城市	210682	凤城市
												锦州市	210700	锦州市
												古塔区	210702	古塔区
												凌河区	210703	凌河区
												太和区	210711	太和区
												黑山县	210726	黑山县
												义县	210727	义县
												凌海市	210781	凌海市
												北镇市	210782	北镇市
												营口市	210800	营口市
												站前区	210802	站前区
												西市区	210803	西市区
												鲅鱼圈区	210804	鲅鱼圈区
												老边区	210811	老边区
												盖州市	210881	盖州市
												大石桥市	210882	大石桥市
												阜新市	210900	阜新市
												海州区	210902	海州区
												新邱区	210903	新邱区
												太平区	210904	太平区
												清河门区	210905	清河门区
												细河区	210911	细河区
												阜新蒙古族自治县	210921	阜新蒙古族自治县
												彰武县	210922	彰武县
												辽阳市	211000	辽阳市
												白塔区	211002	白塔区
												文圣区	211003	文圣区
												宏伟区	211004	宏伟区
												弓长岭区	211005	弓长岭区
												太子河区	211011	太子河区
												辽阳县	211021	辽阳县
												灯塔市	211081	灯塔市
												盘锦市	211100	盘锦市
												双台子区	211102	双台子区
												兴隆台区	211103	兴隆台区
												大洼县	211121	大洼县
												盘山县	211122	盘山县
												铁岭市	211200	铁岭市
												银州区	211202	银州区
												清河区	211204	清河区
												铁岭县	211221	铁岭县
												西丰县	211223	西丰县
												昌图县	211224	昌图县
												调兵山市	211281	调兵山市
												开原市	211282	开原市
												朝阳市	211300	朝阳市
												双塔区	211302	双塔区
												龙城区	211303	龙城区
												朝阳县	211321	朝阳县
												建平县	211322	建平县
												喀喇沁左翼蒙古族自治县	211324	喀喇沁左翼蒙古族自治县
												北票市	211381	北票市
												凌源市	211382	凌源市
												葫芦岛市	211400	葫芦岛市
												连山区	211402	连山区
												龙港区	211403	龙港区
												南票区	211404	南票区
												绥中县	211421	绥中县
												建昌县	211422	建昌县
												兴城市	211481	兴城市
												吉林省	220000	吉林省
												长春市	220100	长春市
												南关区	220102	南关区
												宽城区	220103	宽城区
												朝阳区	220104	朝阳区
												二道区	220105	二道区
												绿园区	220106	绿园区
												双阳区	220112	双阳区
												九台区	220113	九台区
												农安县	220122	农安县
												榆树市	220182	榆树市
												德惠市	220183	德惠市
												吉林市	220200	吉林市
												昌邑区	220202	昌邑区
												龙潭区	220203	龙潭区
												船营区	220204	船营区
												丰满区	220211	丰满区
												永吉县	220221	永吉县
												蛟河市	220281	蛟河市
												桦甸市	220282	桦甸市
												舒兰市	220283	舒兰市
												磐石市	220284	磐石市
												四平市	220300	四平市
												铁西区	220302	铁西区
												铁东区	220303	铁东区
												梨树县	220322	梨树县
												伊通满族自治县	220323	伊通满族自治县
												公主岭市	220381	公主岭市
												双辽市	220382	双辽市
												辽源市	220400	辽源市
												龙山区	220402	龙山区
												西安区	220403	西安区
												东丰县	220421	东丰县
												东辽县	220422	东辽县
												通化市	220500	通化市
												东昌区	220502	东昌区
												二道江区	220503	二道江区
												通化县	220521	通化县
												辉南县	220523	辉南县
												柳河县	220524	柳河县
												梅河口市	220581	梅河口市
												集安市	220582	集安市
												白山市	220600	白山市
												浑江区	220602	浑江区
												江源区	220605	江源区
												抚松县	220621	抚松县
												靖宇县	220622	靖宇县
												长白朝鲜族自治县	220623	长白朝鲜族自治县
												临江市	220681	临江市
												松原市	220700	松原市
												宁江区	220702	宁江区
												前郭尔罗斯蒙古族自治县	220721	前郭尔罗斯蒙古族自治县
												长岭县	220722	长岭县
												乾安县	220723	乾安县
												扶余市	220781	扶余市
												白城市	220800	白城市
												洮北区	220802	洮北区
												镇赉县	220821	镇赉县
												通榆县	220822	通榆县
												洮南市	220881	洮南市
												大安市	220882	大安市
												延边朝鲜族自治州	222400	延边朝鲜族自治州
												延吉市	222401	延吉市
												图们市	222402	图们市
												敦化市	222403	敦化市
												珲春市	222404	珲春市
												龙井市	222405	龙井市
												和龙市	222406	和龙市
												汪清县	222424	汪清县
												安图县	222426	安图县
												黑龙江省	230000	黑龙江省
												哈尔滨市	230100	哈尔滨市
												道里区	230102	道里区
												南岗区	230103	南岗区
												道外区	230104	道外区
												平房区	230108	平房区
												松北区	230109	松北区
												香坊区	230110	香坊区
												呼兰区	230111	呼兰区
												阿城区	230112	阿城区
												双城区	230113	双城区
												依兰县	230123	依兰县
												方正县	230124	方正县
												宾县	230125	宾县
												巴彦县	230126	巴彦县
												木兰县	230127	木兰县
												通河县	230128	通河县
												延寿县	230129	延寿县
												尚志市	230183	尚志市
												五常市	230184	五常市
												齐齐哈尔市	230200	齐齐哈尔市
												龙沙区	230202	龙沙区
												建华区	230203	建华区
												铁锋区	230204	铁锋区
												昂昂溪区	230205	昂昂溪区
												富拉尔基区	230206	富拉尔基区
												碾子山区	230207	碾子山区
												梅里斯达斡尔族区	230208	梅里斯达斡尔族区
												龙江县	230221	龙江县
												依安县	230223	依安县
												泰来县	230224	泰来县
												甘南县	230225	甘南县
												富裕县	230227	富裕县
												克山县	230229	克山县
												克东县	230230	克东县
												拜泉县	230231	拜泉县
												讷河市	230281	讷河市
												鸡西市	230300	鸡西市
												鸡冠区	230302	鸡冠区
												恒山区	230303	恒山区
												滴道区	230304	滴道区
												梨树区	230305	梨树区
												城子河区	230306	城子河区
												麻山区	230307	麻山区
												鸡东县	230321	鸡东县
												虎林市	230381	虎林市
												密山市	230382	密山市
												鹤岗市	230400	鹤岗市
												向阳区	230402	向阳区
												工农区	230403	工农区
												南山区	230404	南山区
												兴安区	230405	兴安区
												东山区	230406	东山区
												兴山区	230407	兴山区
												萝北县	230421	萝北县
												绥滨县	230422	绥滨县
												双鸭山市	230500	双鸭山市
												尖山区	230502	尖山区
												岭东区	230503	岭东区
												四方台区	230505	四方台区
												宝山区	230506	宝山区
												集贤县	230521	集贤县
												友谊县	230522	友谊县
												宝清县	230523	宝清县
												饶河县	230524	饶河县
												大庆市	230600	大庆市
												萨尔图区	230602	萨尔图区
												龙凤区	230603	龙凤区
												让胡路区	230604	让胡路区
												红岗区	230605	红岗区
												大同区	230606	大同区
												肇州县	230621	肇州县
												肇源县	230622	肇源县
												林甸县	230623	林甸县
												杜尔伯特蒙古族自治县	230624	杜尔伯特蒙古族自治县
												伊春市	230700	伊春市
												伊春区	230702	伊春区
												南岔区	230703	南岔区
												友好区	230704	友好区
												西林区	230705	西林区
												翠峦区	230706	翠峦区
												新青区	230707	新青区
												美溪区	230708	美溪区
												金山屯区	230709	金山屯区
												五营区	230710	五营区
												乌马河区	230711	乌马河区
												汤旺河区	230712	汤旺河区
												带岭区	230713	带岭区
												乌伊岭区	230714	乌伊岭区
												红星区	230715	红星区
												上甘岭区	230716	上甘岭区
												嘉荫县	230722	嘉荫县
												铁力市	230781	铁力市
												佳木斯市	230800	佳木斯市
												向阳区	230803	向阳区
												前进区	230804	前进区
												东风区	230805	东风区
												郊区	230811	郊区
												桦南县	230822	桦南县
												桦川县	230826	桦川县
												汤原县	230828	汤原县
												抚远县	230833	抚远县
												同江市	230881	同江市
												富锦市	230882	富锦市
												七台河市	230900	七台河市
												新兴区	230902	新兴区
												桃山区	230903	桃山区
												茄子河区	230904	茄子河区
												勃利县	230921	勃利县
												牡丹江市	231000	牡丹江市
												东安区	231002	东安区
												阳明区	231003	阳明区
												爱民区	231004	爱民区
												西安区	231005	西安区
												东宁县	231024	东宁县
												林口县	231025	林口县
												绥芬河市	231081	绥芬河市
												海林市	231083	海林市
												宁安市	231084	宁安市
												穆棱市	231085	穆棱市
												黑河市	231100	黑河市
												爱辉区	231102	爱辉区
												嫩江县	231121	嫩江县
												逊克县	231123	逊克县
												孙吴县	231124	孙吴县
												北安市	231181	北安市
												五大连池市	231182	五大连池市
												绥化市	231200	绥化市
												北林区	231202	北林区
												望奎县	231221	望奎县
												兰西县	231222	兰西县
												青冈县	231223	青冈县
												庆安县	231224	庆安县
												明水县	231225	明水县
												绥棱县	231226	绥棱县
												安达市	231281	安达市
												肇东市	231282	肇东市
												海伦市	231283	海伦市
												大兴安岭地区	232700	大兴安岭地区
												呼玛县	232721	呼玛县
												塔河县	232722	塔河县
												漠河县	232723	漠河县
												上海市	310000	上海市
												黄浦区	310101	黄浦区
												徐汇区	310104	徐汇区
												长宁区	310105	长宁区
												静安区	310106	静安区
												普陀区	310107	普陀区
												闸北区	310108	闸北区
												虹口区	310109	虹口区
												杨浦区	310110	杨浦区
												闵行区	310112	闵行区
												宝山区	310113	宝山区
												嘉定区	310114	嘉定区
												浦东新区	310115	浦东新区
												金山区	310116	金山区
												松江区	310117	松江区
												青浦区	310118	青浦区
												奉贤区	310120	奉贤区
												崇明县	310230	崇明县
												江苏省	320000	江苏省
												南京市	320100	南京市
												玄武区	320102	玄武区
												秦淮区	320104	秦淮区
												建邺区	320105	建邺区
												鼓楼区	320106	鼓楼区
												浦口区	320111	浦口区
												栖霞区	320113	栖霞区
												雨花台区	320114	雨花台区
												江宁区	320115	江宁区
												六合区	320116	六合区
												溧水区	320117	溧水区
												高淳区	320118	高淳区
												无锡市	320200	无锡市
												崇安区	320202	崇安区
												南长区	320203	南长区
												北塘区	320204	北塘区
												锡山区	320205	锡山区
												惠山区	320206	惠山区
												滨湖区	320211	滨湖区
												江阴市	320281	江阴市
												宜兴市	320282	宜兴市
												徐州市	320300	徐州市
												鼓楼区	320302	鼓楼区
												云龙区	320303	云龙区
												贾汪区	320305	贾汪区
												泉山区	320311	泉山区
												铜山区	320312	铜山区
												丰县	320321	丰县
												沛县	320322	沛县
												睢宁县	320324	睢宁县
												新沂市	320381	新沂市
												邳州市	320382	邳州市
												常州市	320400	常州市
												天宁区	320402	天宁区
												钟楼区	320404	钟楼区
												戚墅堰区	320405	戚墅堰区
												新北区	320411	新北区
												武进区	320412	武进区
												溧阳市	320481	溧阳市
												金坛市	320482	金坛市
												苏州市	320500	苏州市
												虎丘区	320505	虎丘区
												吴中区	320506	吴中区
												相城区	320507	相城区
												姑苏区	320508	姑苏区
												吴江区	320509	吴江区
												常熟市	320581	常熟市
												张家港市	320582	张家港市
												昆山市	320583	昆山市
												太仓市	320585	太仓市
												南通市	320600	南通市
												崇川区	320602	崇川区
												港闸区	320611	港闸区
												通州区	320612	通州区
												海安县	320621	海安县
												如东县	320623	如东县
												启东市	320681	启东市
												如皋市	320682	如皋市
												海门市	320684	海门市
												连云港市	320700	连云港市
												连云区	320703	连云区
												海州区	320706	海州区
												赣榆区	320707	赣榆区
												东海县	320722	东海县
												灌云县	320723	灌云县
												灌南县	320724	灌南县
												淮安市	320800	淮安市
												清河区	320802	清河区
												淮安区	320803	淮安区
												淮阴区	320804	淮阴区
												清浦区	320811	清浦区
												涟水县	320826	涟水县
												洪泽县	320829	洪泽县
												盱眙县	320830	盱眙县
												金湖县	320831	金湖县
												盐城市	320900	盐城市
												亭湖区	320902	亭湖区
												盐都区	320903	盐都区
												响水县	320921	响水县
												滨海县	320922	滨海县
												阜宁县	320923	阜宁县
												射阳县	320924	射阳县
												建湖县	320925	建湖县
												东台市	320981	东台市
												大丰市	320982	大丰市
												扬州市	321000	扬州市
												广陵区	321002	广陵区
												邗江区	321003	邗江区
												江都区	321012	江都区
												宝应县	321023	宝应县
												仪征市	321081	仪征市
												高邮市	321084	高邮市
												镇江市	321100	镇江市
												京口区	321102	京口区
												润州区	321111	润州区
												丹徒区	321112	丹徒区
												丹阳市	321181	丹阳市
												扬中市	321182	扬中市
												句容市	321183	句容市
												泰州市	321200	泰州市
												海陵区	321202	海陵区
												高港区	321203	高港区
												姜堰区	321204	姜堰区
												兴化市	321281	兴化市
												靖江市	321282	靖江市
												泰兴市	321283	泰兴市
												宿迁市	321300	宿迁市
												宿城区	321302	宿城区
												宿豫区	321311	宿豫区
												沭阳县	321322	沭阳县
												泗阳县	321323	泗阳县
												泗洪县	321324	泗洪县
												浙江省	330000	浙江省
												杭州市	330100	杭州市
												上城区	330102	上城区
												下城区	330103	下城区
												江干区	330104	江干区
												拱墅区	330105	拱墅区
												西湖区	330106	西湖区
												滨江区	330108	滨江区
												萧山区	330109	萧山区
												余杭区	330110	余杭区
												富阳区	330111	富阳区
												桐庐县	330122	桐庐县
												淳安县	330127	淳安县
												建德市	330182	建德市
												临安市	330185	临安市
												宁波市	330200	宁波市
												海曙区	330203	海曙区
												江东区	330204	江东区
												江北区	330205	江北区
												北仑区	330206	北仑区
												镇海区	330211	镇海区
												鄞州区	330212	鄞州区
												象山县	330225	象山县
												宁海县	330226	宁海县
												余姚市	330281	余姚市
												慈溪市	330282	慈溪市
												奉化市	330283	奉化市
												温州市	330300	温州市
												鹿城区	330302	鹿城区
												龙湾区	330303	龙湾区
												瓯海区	330304	瓯海区
												洞头县	330322	洞头县
												永嘉县	330324	永嘉县
												平阳县	330326	平阳县
												苍南县	330327	苍南县
												文成县	330328	文成县
												泰顺县	330329	泰顺县
												瑞安市	330381	瑞安市
												乐清市	330382	乐清市
												嘉兴市	330400	嘉兴市
												南湖区	330402	南湖区
												秀洲区	330411	秀洲区
												嘉善县	330421	嘉善县
												海盐县	330424	海盐县
												海宁市	330481	海宁市
												平湖市	330482	平湖市
												桐乡市	330483	桐乡市
												湖州市	330500	湖州市
												吴兴区	330502	吴兴区
												南浔区	330503	南浔区
												德清县	330521	德清县
												长兴县	330522	长兴县
												安吉县	330523	安吉县
												绍兴市	330600	绍兴市
												越城区	330602	越城区
												柯桥区	330603	柯桥区
												上虞区	330604	上虞区
												新昌县	330624	新昌县
												诸暨市	330681	诸暨市
												嵊州市	330683	嵊州市
												金华市	330700	金华市
												婺城区	330702	婺城区
												金东区	330703	金东区
												武义县	330723	武义县
												浦江县	330726	浦江县
												磐安县	330727	磐安县
												兰溪市	330781	兰溪市
												义乌市	330782	义乌市
												东阳市	330783	东阳市
												永康市	330784	永康市
												衢州市	330800	衢州市
												柯城区	330802	柯城区
												衢江区	330803	衢江区
												常山县	330822	常山县
												开化县	330824	开化县
												龙游县	330825	龙游县
												江山市	330881	江山市
												舟山市	330900	舟山市
												定海区	330902	定海区
												普陀区	330903	普陀区
												岱山县	330921	岱山县
												嵊泗县	330922	嵊泗县
												台州市	331000	台州市
												椒江区	331002	椒江区
												黄岩区	331003	黄岩区
												路桥区	331004	路桥区
												玉环县	331021	玉环县
												三门县	331022	三门县
												天台县	331023	天台县
												仙居县	331024	仙居县
												温岭市	331081	温岭市
												临海市	331082	临海市
												丽水市	331100	丽水市
												莲都区	331102	莲都区
												青田县	331121	青田县
												缙云县	331122	缙云县
												遂昌县	331123	遂昌县
												松阳县	331124	松阳县
												云和县	331125	云和县
												庆元县	331126	庆元县
												景宁畲族自治县	331127	景宁畲族自治县
												龙泉市	331181	龙泉市
												安徽省	340000	安徽省
												合肥市	340100	合肥市
												瑶海区	340102	瑶海区
												庐阳区	340103	庐阳区
												蜀山区	340104	蜀山区
												包河区	340111	包河区
												长丰县	340121	长丰县
												肥东县	340122	肥东县
												肥西县	340123	肥西县
												庐江县	340124	庐江县
												巢湖市	340181	巢湖市
												芜湖市	340200	芜湖市
												镜湖区	340202	镜湖区
												弋江区	340203	弋江区
												鸠江区	340207	鸠江区
												三山区	340208	三山区
												芜湖县	340221	芜湖县
												繁昌县	340222	繁昌县
												南陵县	340223	南陵县
												无为县	340225	无为县
												蚌埠市	340300	蚌埠市
												龙子湖区	340302	龙子湖区
												蚌山区	340303	蚌山区
												禹会区	340304	禹会区
												淮上区	340311	淮上区
												怀远县	340321	怀远县
												五河县	340322	五河县
												固镇县	340323	固镇县
												淮南市	340400	淮南市
												大通区	340402	大通区
												田家庵区	340403	田家庵区
												谢家集区	340404	谢家集区
												八公山区	340405	八公山区
												潘集区	340406	潘集区
												凤台县	340421	凤台县
												马鞍山市	340500	马鞍山市
												花山区	340503	花山区
												雨山区	340504	雨山区
												博望区	340506	博望区
												当涂县	340521	当涂县
												含山县	340522	含山县
												和县	340523	和县
												淮北市	340600	淮北市
												杜集区	340602	杜集区
												相山区	340603	相山区
												烈山区	340604	烈山区
												濉溪县	340621	濉溪县
												铜陵市	340700	铜陵市
												铜官山区	340702	铜官山区
												狮子山区	340703	狮子山区
												郊区	340711	郊区
												铜陵县	340721	铜陵县
												安庆市	340800	安庆市
												迎江区	340802	迎江区
												大观区	340803	大观区
												宜秀区	340811	宜秀区
												怀宁县	340822	怀宁县
												枞阳县	340823	枞阳县
												潜山县	340824	潜山县
												太湖县	340825	太湖县
												宿松县	340826	宿松县
												望江县	340827	望江县
												岳西县	340828	岳西县
												桐城市	340881	桐城市
												黄山市	341000	黄山市
												屯溪区	341002	屯溪区
												黄山区	341003	黄山区
												徽州区	341004	徽州区
												歙县	341021	歙县
												休宁县	341022	休宁县
												黟县	341023	黟县
												祁门县	341024	祁门县
												滁州市	341100	滁州市
												琅琊区	341102	琅琊区
												南谯区	341103	南谯区
												来安县	341122	来安县
												全椒县	341124	全椒县
												定远县	341125	定远县
												凤阳县	341126	凤阳县
												天长市	341181	天长市
												明光市	341182	明光市
												阜阳市	341200	阜阳市
												颍州区	341202	颍州区
												颍东区	341203	颍东区
												颍泉区	341204	颍泉区
												临泉县	341221	临泉县
												太和县	341222	太和县
												阜南县	341225	阜南县
												颍上县	341226	颍上县
												界首市	341282	界首市
												宿州市	341300	宿州市
												埇桥区	341302	埇桥区
												砀山县	341321	砀山县
												萧县	341322	萧县
												灵璧县	341323	灵璧县
												泗县	341324	泗县
												六安市	341500	六安市
												金安区	341502	金安区
												裕安区	341503	裕安区
												寿县	341521	寿县
												霍邱县	341522	霍邱县
												舒城县	341523	舒城县
												金寨县	341524	金寨县
												霍山县	341525	霍山县
												亳州市	341600	亳州市
												谯城区	341602	谯城区
												涡阳县	341621	涡阳县
												蒙城县	341622	蒙城县
												利辛县	341623	利辛县
												池州市	341700	池州市
												贵池区	341702	贵池区
												东至县	341721	东至县
												石台县	341722	石台县
												青阳县	341723	青阳县
												宣城市	341800	宣城市
												宣州区	341802	宣州区
												郎溪县	341821	郎溪县
												广德县	341822	广德县
												泾县	341823	泾县
												绩溪县	341824	绩溪县
												旌德县	341825	旌德县
												宁国市	341881	宁国市
												福建省	350000	福建省
												福州市	350100	福州市
												鼓楼区	350102	鼓楼区
												台江区	350103	台江区
												仓山区	350104	仓山区
												马尾区	350105	马尾区
												晋安区	350111	晋安区
												闽侯县	350121	闽侯县
												连江县	350122	连江县
												罗源县	350123	罗源县
												闽清县	350124	闽清县
												永泰县	350125	永泰县
												平潭县	350128	平潭县
												福清市	350181	福清市
												长乐市	350182	长乐市
												厦门市	350200	厦门市
												思明区	350203	思明区
												海沧区	350205	海沧区
												湖里区	350206	湖里区
												集美区	350211	集美区
												同安区	350212	同安区
												翔安区	350213	翔安区
												莆田市	350300	莆田市
												城厢区	350302	城厢区
												涵江区	350303	涵江区
												荔城区	350304	荔城区
												秀屿区	350305	秀屿区
												仙游县	350322	仙游县
												三明市	350400	三明市
												梅列区	350402	梅列区
												三元区	350403	三元区
												明溪县	350421	明溪县
												清流县	350423	清流县
												宁化县	350424	宁化县
												大田县	350425	大田县
												尤溪县	350426	尤溪县
												沙县	350427	沙县
												将乐县	350428	将乐县
												泰宁县	350429	泰宁县
												建宁县	350430	建宁县
												永安市	350481	永安市
												泉州市	350500	泉州市
												鲤城区	350502	鲤城区
												丰泽区	350503	丰泽区
												洛江区	350504	洛江区
												泉港区	350505	泉港区
												惠安县	350521	惠安县
												安溪县	350524	安溪县
												永春县	350525	永春县
												德化县	350526	德化县
												金门县	350527	金门县
												石狮市	350581	石狮市
												晋江市	350582	晋江市
												南安市	350583	南安市
												漳州市	350600	漳州市
												芗城区	350602	芗城区
												龙文区	350603	龙文区
												云霄县	350622	云霄县
												漳浦县	350623	漳浦县
												诏安县	350624	诏安县
												长泰县	350625	长泰县
												东山县	350626	东山县
												南靖县	350627	南靖县
												平和县	350628	平和县
												华安县	350629	华安县
												龙海市	350681	龙海市
												南平市	350700	南平市
												延平区	350702	延平区
												建阳区	350703	建阳区
												顺昌县	350721	顺昌县
												浦城县	350722	浦城县
												光泽县	350723	光泽县
												松溪县	350724	松溪县
												政和县	350725	政和县
												邵武市	350781	邵武市
												武夷山市	350782	武夷山市
												建瓯市	350783	建瓯市
												龙岩市	350800	龙岩市
												新罗区	350802	新罗区
												永定区	350803	永定区
												长汀县	350821	长汀县
												上杭县	350823	上杭县
												武平县	350824	武平县
												连城县	350825	连城县
												漳平市	350881	漳平市
												宁德市	350900	宁德市
												蕉城区	350902	蕉城区
												霞浦县	350921	霞浦县
												古田县	350922	古田县
												屏南县	350923	屏南县
												寿宁县	350924	寿宁县
												周宁县	350925	周宁县
												柘荣县	350926	柘荣县
												福安市	350981	福安市
												福鼎市	350982	福鼎市
												江西省	360000	江西省
												南昌市	360100	南昌市
												东湖区	360102	东湖区
												西湖区	360103	西湖区
												青云谱区	360104	青云谱区
												湾里区	360105	湾里区
												青山湖区	360111	青山湖区
												南昌县	360121	南昌县
												新建县	360122	新建县
												安义县	360123	安义县
												进贤县	360124	进贤县
												景德镇市	360200	景德镇市
												昌江区	360202	昌江区
												珠山区	360203	珠山区
												浮梁县	360222	浮梁县
												乐平市	360281	乐平市
												萍乡市	360300	萍乡市
												安源区	360302	安源区
												湘东区	360313	湘东区
												莲花县	360321	莲花县
												上栗县	360322	上栗县
												芦溪县	360323	芦溪县
												九江市	360400	九江市
												庐山区	360402	庐山区
												浔阳区	360403	浔阳区
												九江县	360421	九江县
												武宁县	360423	武宁县
												修水县	360424	修水县
												永修县	360425	永修县
												德安县	360426	德安县
												星子县	360427	星子县
												都昌县	360428	都昌县
												湖口县	360429	湖口县
												彭泽县	360430	彭泽县
												瑞昌市	360481	瑞昌市
												共青城市	360482	共青城市
												新余市	360500	新余市
												渝水区	360502	渝水区
												分宜县	360521	分宜县
												鹰潭市	360600	鹰潭市
												月湖区	360602	月湖区
												余江县	360622	余江县
												贵溪市	360681	贵溪市
												赣州市	360700	赣州市
												章贡区	360702	章贡区
												南康区	360703	南康区
												赣县	360721	赣县
												信丰县	360722	信丰县
												大余县	360723	大余县
												上犹县	360724	上犹县
												崇义县	360725	崇义县
												安远县	360726	安远县
												龙南县	360727	龙南县
												定南县	360728	定南县
												全南县	360729	全南县
												宁都县	360730	宁都县
												于都县	360731	于都县
												兴国县	360732	兴国县
												会昌县	360733	会昌县
												寻乌县	360734	寻乌县
												石城县	360735	石城县
												瑞金市	360781	瑞金市
												吉安市	360800	吉安市
												吉州区	360802	吉州区
												青原区	360803	青原区
												吉安县	360821	吉安县
												吉水县	360822	吉水县
												峡江县	360823	峡江县
												新干县	360824	新干县
												永丰县	360825	永丰县
												泰和县	360826	泰和县
												遂川县	360827	遂川县
												万安县	360828	万安县
												安福县	360829	安福县
												永新县	360830	永新县
												井冈山市	360881	井冈山市
												宜春市	360900	宜春市
												袁州区	360902	袁州区
												奉新县	360921	奉新县
												万载县	360922	万载县
												上高县	360923	上高县
												宜丰县	360924	宜丰县
												靖安县	360925	靖安县
												铜鼓县	360926	铜鼓县
												丰城市	360981	丰城市
												樟树市	360982	樟树市
												高安市	360983	高安市
												抚州市	361000	抚州市
												临川区	361002	临川区
												南城县	361021	南城县
												黎川县	361022	黎川县
												南丰县	361023	南丰县
												崇仁县	361024	崇仁县
												乐安县	361025	乐安县
												宜黄县	361026	宜黄县
												金溪县	361027	金溪县
												资溪县	361028	资溪县
												东乡县	361029	东乡县
												广昌县	361030	广昌县
												上饶市	361100	上饶市
												信州区	361102	信州区
												上饶县	361121	上饶县
												广丰县	361122	广丰县
												玉山县	361123	玉山县
												铅山县	361124	铅山县
												横峰县	361125	横峰县
												弋阳县	361126	弋阳县
												余干县	361127	余干县
												鄱阳县	361128	鄱阳县
												万年县	361129	万年县
												婺源县	361130	婺源县
												德兴市	361181	德兴市
												山东省	370000	山东省
												济南市	370100	济南市
												历下区	370102	历下区
												市中区	370103	市中区
												槐荫区	370104	槐荫区
												天桥区	370105	天桥区
												历城区	370112	历城区
												长清区	370113	长清区
												平阴县	370124	平阴县
												济阳县	370125	济阳县
												商河县	370126	商河县
												章丘市	370181	章丘市
												青岛市	370200	青岛市
												市南区	370202	市南区
												市北区	370203	市北区
												黄岛区	370211	黄岛区
												崂山区	370212	崂山区
												李沧区	370213	李沧区
												城阳区	370214	城阳区
												胶州市	370281	胶州市
												即墨市	370282	即墨市
												平度市	370283	平度市
												莱西市	370285	莱西市
												淄博市	370300	淄博市
												淄川区	370302	淄川区
												张店区	370303	张店区
												博山区	370304	博山区
												临淄区	370305	临淄区
												周村区	370306	周村区
												桓台县	370321	桓台县
												高青县	370322	高青县
												沂源县	370323	沂源县
												枣庄市	370400	枣庄市
												市中区	370402	市中区
												薛城区	370403	薛城区
												峄城区	370404	峄城区
												台儿庄区	370405	台儿庄区
												山亭区	370406	山亭区
												滕州市	370481	滕州市
												东营市	370500	东营市
												东营区	370502	东营区
												河口区	370503	河口区
												垦利县	370521	垦利县
												利津县	370522	利津县
												广饶县	370523	广饶县
												烟台市	370600	烟台市
												芝罘区	370602	芝罘区
												福山区	370611	福山区
												牟平区	370612	牟平区
												莱山区	370613	莱山区
												长岛县	370634	长岛县
												龙口市	370681	龙口市
												莱阳市	370682	莱阳市
												莱州市	370683	莱州市
												蓬莱市	370684	蓬莱市
												招远市	370685	招远市
												栖霞市	370686	栖霞市
												海阳市	370687	海阳市
												潍坊市	370700	潍坊市
												潍城区	370702	潍城区
												寒亭区	370703	寒亭区
												坊子区	370704	坊子区
												奎文区	370705	奎文区
												临朐县	370724	临朐县
												昌乐县	370725	昌乐县
												青州市	370781	青州市
												诸城市	370782	诸城市
												寿光市	370783	寿光市
												安丘市	370784	安丘市
												高密市	370785	高密市
												昌邑市	370786	昌邑市
												济宁市	370800	济宁市
												任城区	370811	任城区
												兖州区	370812	兖州区
												微山县	370826	微山县
												鱼台县	370827	鱼台县
												金乡县	370828	金乡县
												嘉祥县	370829	嘉祥县
												汶上县	370830	汶上县
												泗水县	370831	泗水县
												梁山县	370832	梁山县
												曲阜市	370881	曲阜市
												邹城市	370883	邹城市
												泰安市	370900	泰安市
												泰山区	370902	泰山区
												岱岳区	370911	岱岳区
												宁阳县	370921	宁阳县
												东平县	370923	东平县
												新泰市	370982	新泰市
												肥城市	370983	肥城市
												威海市	371000	威海市
												环翠区	371002	环翠区
												文登区	371003	文登区
												荣成市	371082	荣成市
												乳山市	371083	乳山市
												日照市	371100	日照市
												东港区	371102	东港区
												岚山区	371103	岚山区
												五莲县	371121	五莲县
												莒县	371122	莒县
												莱芜市	371200	莱芜市
												莱城区	371202	莱城区
												钢城区	371203	钢城区
												临沂市	371300	临沂市
												兰山区	371302	兰山区
												罗庄区	371311	罗庄区
												河东区	371312	河东区
												沂南县	371321	沂南县
												郯城县	371322	郯城县
												沂水县	371323	沂水县
												兰陵县	371324	兰陵县
												费县	371325	费县
												平邑县	371326	平邑县
												莒南县	371327	莒南县
												蒙阴县	371328	蒙阴县
												临沭县	371329	临沭县
												德州市	371400	德州市
												德城区	371402	德城区
												陵城区	371403	陵城区
												宁津县	371422	宁津县
												庆云县	371423	庆云县
												临邑县	371424	临邑县
												齐河县	371425	齐河县
												平原县	371426	平原县
												夏津县	371427	夏津县
												武城县	371428	武城县
												乐陵市	371481	乐陵市
												禹城市	371482	禹城市
												聊城市	371500	聊城市
												东昌府区	371502	东昌府区
												阳谷县	371521	阳谷县
												莘县	371522	莘县
												茌平县	371523	茌平县
												东阿县	371524	东阿县
												冠县	371525	冠县
												高唐县	371526	高唐县
												临清市	371581	临清市
												滨州市	371600	滨州市
												滨城区	371602	滨城区
												沾化区	371603	沾化区
												惠民县	371621	惠民县
												阳信县	371622	阳信县
												无棣县	371623	无棣县
												博兴县	371625	博兴县
												邹平县	371626	邹平县
												菏泽市	371700	菏泽市
												牡丹区	371702	牡丹区
												曹县	371721	曹县
												单县	371722	单县
												成武县	371723	成武县
												巨野县	371724	巨野县
												郓城县	371725	郓城县
												鄄城县	371726	鄄城县
												定陶县	371727	定陶县
												东明县	371728	东明县
												河南省	410000	河南省
												郑州市	410100	郑州市
												中原区	410102	中原区
												二七区	410103	二七区
												管城回族区	410104	管城回族区
												金水区	410105	金水区
												上街区	410106	上街区
												惠济区	410108	惠济区
												中牟县	410122	中牟县
												巩义市	410181	巩义市
												荥阳市	410182	荥阳市
												新密市	410183	新密市
												新郑市	410184	新郑市
												登封市	410185	登封市
												开封市	410200	开封市
												龙亭区	410202	龙亭区
												顺河回族区	410203	顺河回族区
												鼓楼区	410204	鼓楼区
												禹王台区	410205	禹王台区
												祥符区	410212	祥符区
												杞县	410221	杞县
												通许县	410222	通许县
												尉氏县	410223	尉氏县
												兰考县	410225	兰考县
												洛阳市	410300	洛阳市
												老城区	410302	老城区
												西工区	410303	西工区
												瀍河回族区	410304	瀍河回族区
												涧西区	410305	涧西区
												吉利区	410306	吉利区
												洛龙区	410311	洛龙区
												孟津县	410322	孟津县
												新安县	410323	新安县
												栾川县	410324	栾川县
												嵩县	410325	嵩县
												汝阳县	410326	汝阳县
												宜阳县	410327	宜阳县
												洛宁县	410328	洛宁县
												伊川县	410329	伊川县
												偃师市	410381	偃师市
												平顶山市	410400	平顶山市
												新华区	410402	新华区
												卫东区	410403	卫东区
												石龙区	410404	石龙区
												湛河区	410411	湛河区
												宝丰县	410421	宝丰县
												叶县	410422	叶县
												鲁山县	410423	鲁山县
												郏县	410425	郏县
												舞钢市	410481	舞钢市
												汝州市	410482	汝州市
												安阳市	410500	安阳市
												文峰区	410502	文峰区
												北关区	410503	北关区
												殷都区	410505	殷都区
												龙安区	410506	龙安区
												安阳县	410522	安阳县
												汤阴县	410523	汤阴县
												滑县	410526	滑县
												内黄县	410527	内黄县
												林州市	410581	林州市
												鹤壁市	410600	鹤壁市
												鹤山区	410602	鹤山区
												山城区	410603	山城区
												淇滨区	410611	淇滨区
												浚县	410621	浚县
												淇县	410622	淇县
												新乡市	410700	新乡市
												红旗区	410702	红旗区
												卫滨区	410703	卫滨区
												凤泉区	410704	凤泉区
												牧野区	410711	牧野区
												新乡县	410721	新乡县
												获嘉县	410724	获嘉县
												原阳县	410725	原阳县
												延津县	410726	延津县
												封丘县	410727	封丘县
												长垣县	410728	长垣县
												卫辉市	410781	卫辉市
												辉县市	410782	辉县市
												焦作市	410800	焦作市
												解放区	410802	解放区
												中站区	410803	中站区
												马村区	410804	马村区
												山阳区	410811	山阳区
												修武县	410821	修武县
												博爱县	410822	博爱县
												武陟县	410823	武陟县
												温县	410825	温县
												沁阳市	410882	沁阳市
												孟州市	410883	孟州市
												濮阳市	410900	濮阳市
												华龙区	410902	华龙区
												清丰县	410922	清丰县
												南乐县	410923	南乐县
												范县	410926	范县
												台前县	410927	台前县
												濮阳县	410928	濮阳县
												许昌市	411000	许昌市
												魏都区	411002	魏都区
												许昌县	411023	许昌县
												鄢陵县	411024	鄢陵县
												襄城县	411025	襄城县
												禹州市	411081	禹州市
												长葛市	411082	长葛市
												漯河市	411100	漯河市
												源汇区	411102	源汇区
												郾城区	411103	郾城区
												召陵区	411104	召陵区
												舞阳县	411121	舞阳县
												临颍县	411122	临颍县
												三门峡市	411200	三门峡市
												湖滨区	411202	湖滨区
												渑池县	411221	渑池县
												陕县	411222	陕县
												卢氏县	411224	卢氏县
												义马市	411281	义马市
												灵宝市	411282	灵宝市
												南阳市	411300	南阳市
												宛城区	411302	宛城区
												卧龙区	411303	卧龙区
												南召县	411321	南召县
												方城县	411322	方城县
												西峡县	411323	西峡县
												镇平县	411324	镇平县
												内乡县	411325	内乡县
												淅川县	411326	淅川县
												社旗县	411327	社旗县
												唐河县	411328	唐河县
												新野县	411329	新野县
												桐柏县	411330	桐柏县
												邓州市	411381	邓州市
												商丘市	411400	商丘市
												梁园区	411402	梁园区
												睢阳区	411403	睢阳区
												民权县	411421	民权县
												睢县	411422	睢县
												宁陵县	411423	宁陵县
												柘城县	411424	柘城县
												虞城县	411425	虞城县
												夏邑县	411426	夏邑县
												永城市	411481	永城市
												信阳市	411500	信阳市
												浉河区	411502	浉河区
												平桥区	411503	平桥区
												罗山县	411521	罗山县
												光山县	411522	光山县
												新县	411523	新县
												商城县	411524	商城县
												固始县	411525	固始县
												潢川县	411526	潢川县
												淮滨县	411527	淮滨县
												息县	411528	息县
												周口市	411600	周口市
												川汇区	411602	川汇区
												扶沟县	411621	扶沟县
												西华县	411622	西华县
												商水县	411623	商水县
												沈丘县	411624	沈丘县
												郸城县	411625	郸城县
												淮阳县	411626	淮阳县
												太康县	411627	太康县
												鹿邑县	411628	鹿邑县
												项城市	411681	项城市
												驻马店市	411700	驻马店市
												驿城区	411702	驿城区
												西平县	411721	西平县
												上蔡县	411722	上蔡县
												平舆县	411723	平舆县
												正阳县	411724	正阳县
												确山县	411725	确山县
												泌阳县	411726	泌阳县
												汝南县	411727	汝南县
												遂平县	411728	遂平县
												新蔡县	411729	新蔡县
												济源市	419001	济源市
												湖北省	420000	湖北省
												武汉市	420100	武汉市
												江岸区	420102	江岸区
												江汉区	420103	江汉区
												硚口区	420104	硚口区
												汉阳区	420105	汉阳区
												武昌区	420106	武昌区
												青山区	420107	青山区
												洪山区	420111	洪山区
												东西湖区	420112	东西湖区
												汉南区	420113	汉南区
												蔡甸区	420114	蔡甸区
												江夏区	420115	江夏区
												黄陂区	420116	黄陂区
												新洲区	420117	新洲区
												黄石市	420200	黄石市
												黄石港区	420202	黄石港区
												西塞山区	420203	西塞山区
												下陆区	420204	下陆区
												铁山区	420205	铁山区
												阳新县	420222	阳新县
												大冶市	420281	大冶市
												十堰市	420300	十堰市
												茅箭区	420302	茅箭区
												张湾区	420303	张湾区
												郧阳区	420304	郧阳区
												郧西县	420322	郧西县
												竹山县	420323	竹山县
												竹溪县	420324	竹溪县
												房县	420325	房县
												丹江口市	420381	丹江口市
												宜昌市	420500	宜昌市
												西陵区	420502	西陵区
												伍家岗区	420503	伍家岗区
												点军区	420504	点军区
												猇亭区	420505	猇亭区
												夷陵区	420506	夷陵区
												远安县	420525	远安县
												兴山县	420526	兴山县
												秭归县	420527	秭归县
												长阳土家族自治县	420528	长阳土家族自治县
												五峰土家族自治县	420529	五峰土家族自治县
												宜都市	420581	宜都市
												当阳市	420582	当阳市
												枝江市	420583	枝江市
												襄阳市	420600	襄阳市
												襄城区	420602	襄城区
												樊城区	420606	樊城区
												襄州区	420607	襄州区
												南漳县	420624	南漳县
												谷城县	420625	谷城县
												保康县	420626	保康县
												老河口市	420682	老河口市
												枣阳市	420683	枣阳市
												宜城市	420684	宜城市
												鄂州市	420700	鄂州市
												梁子湖区	420702	梁子湖区
												华容区	420703	华容区
												鄂城区	420704	鄂城区
												荆门市	420800	荆门市
												东宝区	420802	东宝区
												掇刀区	420804	掇刀区
												京山县	420821	京山县
												沙洋县	420822	沙洋县
												钟祥市	420881	钟祥市
												孝感市	420900	孝感市
												孝南区	420902	孝南区
												孝昌县	420921	孝昌县
												大悟县	420922	大悟县
												云梦县	420923	云梦县
												应城市	420981	应城市
												安陆市	420982	安陆市
												汉川市	420984	汉川市
												荆州市	421000	荆州市
												沙市区	421002	沙市区
												荆州区	421003	荆州区
												公安县	421022	公安县
												监利县	421023	监利县
												江陵县	421024	江陵县
												石首市	421081	石首市
												洪湖市	421083	洪湖市
												松滋市	421087	松滋市
												黄冈市	421100	黄冈市
												黄州区	421102	黄州区
												团风县	421121	团风县
												红安县	421122	红安县
												罗田县	421123	罗田县
												英山县	421124	英山县
												浠水县	421125	浠水县
												蕲春县	421126	蕲春县
												黄梅县	421127	黄梅县
												麻城市	421181	麻城市
												武穴市	421182	武穴市
												咸宁市	421200	咸宁市
												咸安区	421202	咸安区
												嘉鱼县	421221	嘉鱼县
												通城县	421222	通城县
												崇阳县	421223	崇阳县
												通山县	421224	通山县
												赤壁市	421281	赤壁市
												随州市	421300	随州市
												曾都区	421303	曾都区
												随县	421321	随县
												广水市	421381	广水市
												恩施土家族苗族自治州	422800	恩施土家族苗族自治州
												恩施市	422801	恩施市
												利川市	422802	利川市
												建始县	422822	建始县
												巴东县	422823	巴东县
												宣恩县	422825	宣恩县
												咸丰县	422826	咸丰县
												来凤县	422827	来凤县
												鹤峰县	422828	鹤峰县
												仙桃市	429004	仙桃市
												潜江市	429005	潜江市
												天门市	429006	天门市
												神农架林区	429021	神农架林区
												湖南省	430000	湖南省
												长沙市	430100	长沙市
												芙蓉区	430102	芙蓉区
												天心区	430103	天心区
												岳麓区	430104	岳麓区
												开福区	430105	开福区
												雨花区	430111	雨花区
												望城区	430112	望城区
												长沙县	430121	长沙县
												宁乡县	430124	宁乡县
												浏阳市	430181	浏阳市
												株洲市	430200	株洲市
												荷塘区	430202	荷塘区
												芦淞区	430203	芦淞区
												石峰区	430204	石峰区
												天元区	430211	天元区
												株洲县	430221	株洲县
												攸县	430223	攸县
												茶陵县	430224	茶陵县
												炎陵县	430225	炎陵县
												醴陵市	430281	醴陵市
												湘潭市	430300	湘潭市
												雨湖区	430302	雨湖区
												岳塘区	430304	岳塘区
												湘潭县	430321	湘潭县
												湘乡市	430381	湘乡市
												韶山市	430382	韶山市
												衡阳市	430400	衡阳市
												珠晖区	430405	珠晖区
												雁峰区	430406	雁峰区
												石鼓区	430407	石鼓区
												蒸湘区	430408	蒸湘区
												南岳区	430412	南岳区
												衡阳县	430421	衡阳县
												衡南县	430422	衡南县
												衡山县	430423	衡山县
												衡东县	430424	衡东县
												祁东县	430426	祁东县
												耒阳市	430481	耒阳市
												常宁市	430482	常宁市
												邵阳市	430500	邵阳市
												双清区	430502	双清区
												大祥区	430503	大祥区
												北塔区	430511	北塔区
												邵东县	430521	邵东县
												新邵县	430522	新邵县
												邵阳县	430523	邵阳县
												隆回县	430524	隆回县
												洞口县	430525	洞口县
												绥宁县	430527	绥宁县
												新宁县	430528	新宁县
												城步苗族自治县	430529	城步苗族自治县
												武冈市	430581	武冈市
												岳阳市	430600	岳阳市
												岳阳楼区	430602	岳阳楼区
												云溪区	430603	云溪区
												君山区	430611	君山区
												岳阳县	430621	岳阳县
												华容县	430623	华容县
												湘阴县	430624	湘阴县
												平江县	430626	平江县
												汨罗市	430681	汨罗市
												临湘市	430682	临湘市
												常德市	430700	常德市
												武陵区	430702	武陵区
												鼎城区	430703	鼎城区
												安乡县	430721	安乡县
												汉寿县	430722	汉寿县
												澧县	430723	澧县
												临澧县	430724	临澧县
												桃源县	430725	桃源县
												石门县	430726	石门县
												津市市	430781	津市市
												张家界市	430800	张家界市
												永定区	430802	永定区
												武陵源区	430811	武陵源区
												慈利县	430821	慈利县
												桑植县	430822	桑植县
												益阳市	430900	益阳市
												资阳区	430902	资阳区
												赫山区	430903	赫山区
												南县	430921	南县
												桃江县	430922	桃江县
												安化县	430923	安化县
												沅江市	430981	沅江市
												郴州市	431000	郴州市
												北湖区	431002	北湖区
												苏仙区	431003	苏仙区
												桂阳县	431021	桂阳县
												宜章县	431022	宜章县
												永兴县	431023	永兴县
												嘉禾县	431024	嘉禾县
												临武县	431025	临武县
												汝城县	431026	汝城县
												桂东县	431027	桂东县
												安仁县	431028	安仁县
												资兴市	431081	资兴市
												永州市	431100	永州市
												零陵区	431102	零陵区
												冷水滩区	431103	冷水滩区
												祁阳县	431121	祁阳县
												东安县	431122	东安县
												双牌县	431123	双牌县
												道县	431124	道县
												江永县	431125	江永县
												宁远县	431126	宁远县
												蓝山县	431127	蓝山县
												新田县	431128	新田县
												江华瑶族自治县	431129	江华瑶族自治县
												怀化市	431200	怀化市
												鹤城区	431202	鹤城区
												中方县	431221	中方县
												沅陵县	431222	沅陵县
												辰溪县	431223	辰溪县
												溆浦县	431224	溆浦县
												会同县	431225	会同县
												麻阳苗族自治县	431226	麻阳苗族自治县
												新晃侗族自治县	431227	新晃侗族自治县
												芷江侗族自治县	431228	芷江侗族自治县
												靖州苗族侗族自治县	431229	靖州苗族侗族自治县
												通道侗族自治县	431230	通道侗族自治县
												洪江市	431281	洪江市
												娄底市	431300	娄底市
												娄星区	431302	娄星区
												双峰县	431321	双峰县
												新化县	431322	新化县
												冷水江市	431381	冷水江市
												涟源市	431382	涟源市
												湘西土家族苗族自治州	433100	湘西土家族苗族自治州
												吉首市	433101	吉首市
												泸溪县	433122	泸溪县
												凤凰县	433123	凤凰县
												花垣县	433124	花垣县
												保靖县	433125	保靖县
												古丈县	433126	古丈县
												永顺县	433127	永顺县
												龙山县	433130	龙山县
												广东省	440000	广东省
												广州市	440100	广州市
												荔湾区	440103	荔湾区
												越秀区	440104	越秀区
												海珠区	440105	海珠区
												天河区	440106	天河区
												白云区	440111	白云区
												黄埔区	440112	黄埔区
												番禺区	440113	番禺区
												花都区	440114	花都区
												南沙区	440115	南沙区
												从化区	440117	从化区
												增城区	440118	增城区
												韶关市	440200	韶关市
												武江区	440203	武江区
												浈江区	440204	浈江区
												曲江区	440205	曲江区
												始兴县	440222	始兴县
												仁化县	440224	仁化县
												翁源县	440229	翁源县
												乳源瑶族自治县	440232	乳源瑶族自治县
												新丰县	440233	新丰县
												乐昌市	440281	乐昌市
												南雄市	440282	南雄市
												深圳市	440300	深圳市
												罗湖区	440303	罗湖区
												福田区	440304	福田区
												南山区	440305	南山区
												宝安区	440306	宝安区
												龙岗区	440307	龙岗区
												盐田区	440308	盐田区
												珠海市	440400	珠海市
												香洲区	440402	香洲区
												斗门区	440403	斗门区
												金湾区	440404	金湾区
												汕头市	440500	汕头市
												龙湖区	440507	龙湖区
												金平区	440511	金平区
												濠江区	440512	濠江区
												潮阳区	440513	潮阳区
												潮南区	440514	潮南区
												澄海区	440515	澄海区
												南澳县	440523	南澳县
												佛山市	440600	佛山市
												禅城区	440604	禅城区
												南海区	440605	南海区
												顺德区	440606	顺德区
												三水区	440607	三水区
												高明区	440608	高明区
												江门市	440700	江门市
												蓬江区	440703	蓬江区
												江海区	440704	江海区
												新会区	440705	新会区
												台山市	440781	台山市
												开平市	440783	开平市
												鹤山市	440784	鹤山市
												恩平市	440785	恩平市
												湛江市	440800	湛江市
												赤坎区	440802	赤坎区
												霞山区	440803	霞山区
												坡头区	440804	坡头区
[truncated: 1,255 more rows]

## Sheet: Provinces
year	prov_name_eng	index_aggregate	coverage_breadth	usage_depth	payment	insurance	monetary_fund	investment	credit	credit_investigation	digitization_level
2011	Beijing	79.41	97.53	72.23	79.4	59.48			76.75		32.59
2012	Beijing	150.65	155.56	159.42	110.02	216.68			141.07		118.47
2013	Beijing	215.62	193.86	247.5	136.53	617.63	94.21		131.17		229.57
2014	Beijing	235.36	243.92	219.89	196.25	663.95	209.83	94.93	120.76		235.22
2015	Beijing	276.38	268.39	234.17	243.23	469.42	239.07	230.65	173.81	92.32	379.48
2016	Beijing	286.37	285.649	263.738	286.875	566.473	262.63	210.943	172.792	251.615	329.897
2017	Beijing	329.944	316.118	357.237	303.119	717.794	274.604	388.932	210.414	340.349	326.019
2018	Beijing	368.537	353.867	366.782	317.537	747.899	229.242	405.876	216.264	345.805	420.189
2019	Beijing	399.003	384.656	402.07	330.512	803.142		470.546	253.175		440.826
2020	Beijing	417.875	397.002	445.833	342.689	787.938		646.972	265.329		436.022
2021	Beijing	445.441	432.927	474.298	350.127	803.775		758.682	279.971		434.35
2022	Beijing	452.83	455.927	445.598	296.78	724.096		717.404	274.878		455.774
2023	Beijing	463.629	466.275	459.052	298.717	811.558		682.796	289.844		463.237
2011	Tianjin	60.58	69.37	53.33	55.52	75.74			43.73		44.72
2012	Tianjin	122.96	110.61	135.77	74.34	212.58			110.61		140.44
2013	Tianjin	175.26	146.54	197.52	110.17	511.81	53.85		100.24		229.67
2014	Tianjin	200.16	193.86	180.28	165.52	576.75	166.06	59.55	97.95		257.11
2015	Tianjin	237.53	211.89	195.46	206.76	427.33	193.62	183.24	143.47	52.11	398.62
2016	Tianjin	245.838	225.412	231.615	247.135	541.825	226.723	159.763	155.953	202.6	339.147
2017	Tianjin	284.034	257.904	310.133	257.204	666.466	245.036	312.835	188.374	265.139	322.905
2018	Tianjin	316.885	295.348	317.938	278.233	717.909	201.491	294.273	191.016	316.05	386.104
2019	Tianjin	344.112	323.857	349.013	292.572	775.651		342.676	224.824		402.111
2020	Tianjin	361.455	340.29	373.907	291.872	710.854		472.147	242.446		408.738
2021	Tianjin	395.735	381.745	404.557	288.262	704.789		588.279	265.338		425.921
2022	Tianjin	407.305	407.211	377.923	263.763	640.009		525.657	267.744		461.032
2023	Tianjin	422.892	423.543	396.641	272.599	695.159		536.479	278.854		468.471
2011	Hebei	32.42	18.46	44.19	24.36	24.83			54.49		57.15
2012	Hebei	89.32	65.46	108.15	43.52	132.99			105.02		133.9
2013	Hebei	144.98	105.66	162.85	64.92	422.49	24.22		88.71		242.35
2014	Hebei	160.76	149.97	131.34	114.97	423.99	126.08	27.5	79.94		249.86
2015	Hebei	199.53	172.78	151.45	161.59	306.8	162.76	144.95	127.69	0	375.2
2016	Hebei	214.359	191.55	196.874	214.64	434.793	213.26	125.481	145.451	174.722	321.46
2017	Hebei	258.167	232.892	273.451	226.547	572.535	222.528	263.341	170.228	269.074	313.865
2018	Hebei	282.772	264.062	267.925	238.963	608.739	178.156	229.244	166.12	280.178	371.55
2019	Hebei	305.06	284.387	297.331	258.605	654.049		278.897	200.681		387.383
2020	Hebei	322.697	304.095	318.415	268.495	625.016		357.459	222.885		391.919
2021	Hebei	352.44	335.689	352.951	257.103	593.199		492.95	244.616		406.843
2022	Hebei	360.651	357.947	321.47	241.052	510.376		414.078	250.615		440.797
2023	Hebei	376.108	375.303	343.059	248.614	562.071		438.264	261.659		438.843
2011	Shanxi	33.41	28.94	21.61	19.48	20.25			22.42		69.57
2012	Shanxi	92.98	75.2	86.48	37.43	143.54			68.17		163.5
2013	Shanxi	144.22	115.4	139.08	61.87	422.74	14.73		50.21		248.75
2014	Shanxi	167.66	163.16	124.78	117.06	462.67	122.03	20.44	53.43		260.43
2015	Shanxi	206.3	186.14	141.52	159.41	337.67	156.65	124.49	97.75	21.99	390.57
2016	Shanxi	224.811	205.505	189.377	206.373	451.068	201.157	101.348	134.391	187.726	352.958
2017	Shanxi	259.955	243.023	254.979	216.395	553.604	220.147	234.64	159.254	234.504	324.922
2018	Shanxi	283.654	277.029	249.73	243.577	560.073	183.777	192.967	163.006	273.105	367.194
2019	Shanxi	308.726	305.61	277.891	265.712	611.36		238.927	192.514		375.065
2020	Shanxi	325.727	327.287	291.365	272.444	571.953		287.495	220.114		383.036
2021	Shanxi	359.701	363.631	331.727	259.275	558.771		418.489	250.486		397.581
2022	Shanxi	366.066	388.713	294.191	239.382	478.187		319.426	252.536		421.915
2023	Shanxi	384.235	403.583	328.767	244.723	545.21		378.627	265.99		421.168
2011	Inner Mongolia	28.89	24.65	30.27	27.51	49.83			22.42		40.35
2012	Inner Mongolia	91.68	75.03	95.44	45.63	158.4			74.75		139.78
2013	Inner Mongolia	146.59	116.37	138.84	73.66	369.88	4.22		72.3		260.45
2014	Inner Mongolia	172.56	165.46	114.88	117.47	428.7	111.48	9.2	53.41		300.84
2015	Inner Mongolia	214.55	185.34	136.04	154.71	332.6	136.78	111.59	100.99	10.04	453.66
2016	Inner Mongolia	229.926	201.997	184.89	195.219	466.551	176.227	99.44	125.88	176.299	403.997
2017	Inner Mongolia	258.504	238.92	249.198	196.397	563.672	190.605	240.184	141.026	243.894	340.096
2018	Inner Mongolia	271.567	269.492	232.313	205.875	561.439	138.359	178.877	141.029	261.414	349.765
2019	Inner Mongolia	293.889	291.449	260.313	224.234	636.915		211.502	166.982		362.977
2020	Inner Mongolia	309.394	310.4	275.657	244.519	583.568		263.632	198.352		367.4
2021	Inner Mongolia	344.759	346.889	318.603	231.545	547.907		421.821	229.02		385.276
2022	Inner Mongolia	353.896	376.309	285.822	213.018	476.608		333.061	229.486		403.613
2023	Inner Mongolia	374.629	394.396	323.73	216.553	565.037		392.722	246.186		401.873
2011	Liaoning	43.29	44.96	44.64	49.24	48.98			42.31		35.33
2012	Liaoning	103.53	89.01	120.36	69.54	187.08			98.21		120.91
2013	Liaoning	160.07	126.67	181.54	93.89	485.17	27.93		90.42		231.33
2014	Liaoning	187.61	175.49	162.89	143.45	550.31	139.88	40.66	87.32		272.53
2015	Liaoning	226.4	194.17	178.41	181.6	398.6	168.45	166.5	132.75	37.34	420.06
2016	Liaoning	231.411	207.737	220.062	219.017	523.974	205.064	142.03	152.895	197.607	330.215
2017	Liaoning	267.176	239.872	291.265	224.177	630.044	218.807	282.882	182.831	261.754	313.574
2018	Liaoning	290.951	271.813	279.476	237.745	647.867	165.28	241.641	169.261	298.842	375.012
2019	Liaoning	311.012	292.444	302.521	249.436	700.177		275.387	194.629		387.77
2020	Liaoning	326.294	307.112	328.118	259.306	677.778		364.963	218.372		386.333
2021	Liaoning	357.235	340.1	363.898	252.484	659.921		505.35	242.951		401.725
2022	Liaoning	365.246	364.922	333.106	233.53	588.98		425.847	244.202		424.745
2023	Liaoning	379.655	380.977	352.374	237.77	629.094		446.719	255.971		424.89
2011	Jilin	24.51	23.75	24.04	23.89	23.85			24.13		27.86
2012	Jilin	87.23	69.43	93.83	44.98	127.45			85.27		133.99
2013	Jilin	138.36	106.85	147.95	72.92	396.34	8.92		76.01		224.97
2014	Jilin	165.62	154.91	136.01	118.63	462.03	119.15	30.66	73.74		254.75
2015	Jilin	208.2	175.49	154.68	166.01	343.1	152.29	149.57	113.84	20.53	413.47
2016	Jilin	217.074	191.939	204.138	209.462	482.137	195.405	124.462	144.934	189.895	323.59
2017	Jilin	254.765	227.446	273.624	210.334	593.75	209.983	262.227	170.99	251.909	310.718
2018	Jilin	276.075	256.546	255.226	216.836	584.77	154.236	214.501	159.502	278.483	378.464
2019	Jilin	292.774	275.748	275.929	233.287	633.622		241.918	182.763		379.62
2020	Jilin	308.256	290.781	297.632	245.124	640.014		294.006	209.735		385.286
2021	Jilin	339.413	325.382	334.223	236.064	616.037		429.354	236.054		395.198
2022	Jilin	343.667	347.63	300.71	217.591	550.194		339.668	235.605		408.663
2023	Jilin	359.799	362.765	329.41	225.258	599.807		385.042	251.015		405.251
2011	Heilongjiang	33.58	21.12	36.28	33.74	39.37			35.28		69.83
2012	Heilongjiang	87.91	66.48	100.46	56.37	153.19			83.4		135.89
2013	Heilongjiang	141.4	104.49	152.58	80.25	418.82	13.87		72.84		242.97
2014	Heilongjiang	167.8	152.48	142.48	127.57	484.01	129.53	32.27	75.98		264.41
2015	Heilongjiang	209.93	174.68	164.06	170.1	363.16	163.96	168.8	111.5	33.75	409.72
2016	Heilongjiang	221.886	191.241	206.542	214.354	496.969	204.829	122.775	142.575	195.351	350.968
2017	Heilongjiang	256.78	225.996	275.861	214.679	593.531	217.39	261.072	173.295	262.033	323.77
2018	Heilongjiang	274.735	256.123	254.882	220.173	571.269	167.344	213.101	160.679	285.717	372.281
2019	Heilongjiang	292.869	275.789	274.641	237.002	619.678		244.872	181.231		382.409
2020	Heilongjiang	306.075	290.479	293.695	241.555	615.419		301.913	202.654		380.091
2021	Heilongjiang	341.139	327.594	335.196	240.556	600.213		445.347	234.721		396.686
2022	Heilongjiang	347.594	349.679	305.346	225.077	540.332		357.174	238.932		417.503
2023	Heilongjiang	362.367	365.075	332.192	229.756	598.492		394.826	252.732		408.28
2011	Shanghai	80.19	98.85	86.24	100	72.82			90.3		7.58
2012	Shanghai	150.77	149.35	174.72	136.14	227.7			156.94		111.94
2013	Shanghai	222.14	187.31	280.93	169.95	680.74	100		156.87		230.3
2014	Shanghai	239.53	237.02	242.78	225.1	725.26	220.53	96.62	142.88		241.88
2015	Shanghai	278.11	258.98	259.81	268.49	521.32	252.66	246.52	201.7	99.92	374.54
2016	Shanghai	282.224	274.245	281.475	309.087	615.246	278.976	222.346	190.795	233.865	309.944
2017	Shanghai	336.651	305.888	396.049	333.427	785.389	294.745	398.994	231.809	486.767	330.311
2018	Shanghai	377.734	346.332	400.397	356.144	849.618	261.162	419.905	243.076	344.98	440.26
2019	Shanghai	410.281	378.251	439.912	365.222	932.264		480.108	282.226		462.228
2020	Shanghai	431.928	395.204	488.683	368.97	945.367		658.181	296.029		450.08
2021	Shanghai	458.97	433.423	510.694	367.667	951.939		753.592	303.741		449.364
2022	Shanghai	460.691	455.912	465.823	327.053	798.131		713.425	289.692		467.172
2023	Shanghai	473.834	466.54	485.419	334.711	899.608		691.398	303.211		476.896
2011	Jiangsu	62.08	66.7	79.22	80.77	78.49			79.35		15.71
2012	Jiangsu	122.03	106.69	156.55	98.32	228.07			133.23		109.94
2013	Jiangsu	180.98	144.68	223.09	128.77	543.88	70.02		125.46		224.3
2014	Jiangsu	204.16	193.18	201.09	184.42	611.07	182.13	72.09	119.53		246.02
2015	Jiangsu	244.01	215.94	218.62	227.43	441.96	216.8	196.83	173.28	88.44	382.84
2016	Jiangsu	253.753	233.219	253.077	279.692	560.71	255.342	172.069	174.219	253.808	322.8
2017	Jiangsu	297.688	272.323	328.93	298.294	688.837	276.233	318.366	205.108	301.741	324.693
2018	Jiangsu	334.021	311.951	333.085	313.482	732.7	234.921	302.169	208.819	319.519	408.619
2019	Jiangsu	361.927	341.499	365.496	324.037	789.044		354.608	245.286		422.918
2020	Jiangsu	381.613	362.109	395.006	327.2	752.292		482.199	262.859		421.699
2021	Jiangsu	412.921	398.656	428.998	319.385	760.097		605.179	279.316		430.835
2022	Jiangsu	424.065	424.767	401.97	297.001	708.549		533.845	281.833		461.921
2023	Jiangsu	438.606	440.634	421.771	300.452	771.191		550.227	290.101		462.53
2011	Zhejiang	77.39	85.53	93.52	96.52	100			90.48		21.22
2012	Zhejiang	146.35	128.5	200.42	130.89	324.29			156.52		107.07
2013	Zhejiang	205.77	167.96	265.48	166.23	649.99	95.21		144.69		222.12
2014	Zhejiang	224.45	217.48	233.67	224.06	687.54	206.83	96.58	139.65		230.71
2015	Zhejiang	264.85	239.33	251.29	270.92	518.33	243.83	233.82	196.9	74.43	373.77
2016	Zhejiang	268.105	254.442	270.624	316.531	608.206	279.392	192.467	189.768	212.018	308.656
2017	Zhejiang	318.052	290.055	366.399	343.861	768.734	303.166	344.676	224.291	372.469	322.662
2018	Zhejiang	357.445	330.169	372.008	379.508	838.08	256.934	337.909	229.695	328.803	421.07
2019	Zhejiang	387.488	362.404	404.648	363.098	899.847		392.673	265.623		439.156
2020	Zhejiang	406.878	382.072	439.253	365.546	881.996		531.883	281.248		429.979
2021	Zhejiang	434.609	415.931	468.565	364.262	869.205		648.222	292.827		434.61
2022	Zhejiang	440.045	441.519	424.117	329.012	741.275		565.211	293.683		464.148
2023	Zhejiang	453.78	455.156	443.79	331.589	811.475		579.979	300.721		467.419
2011	Anhui	33.07	20.2	55.58	49.04	40.63			62.54		34.66
2012	Anhui	96.63	66.06	138.06	67.84	215.71			113.52		122.31
2013	Anhui	150.83	106.51	190.86	95.33	493.54	37.52		100.96		224.45
2014	Anhui	180.59	156.56	173.84	151.5	547.03	151.28	59.96	98.99		272.22
2015	Anhui	211.28	171.65	189.78	196.92	396.7	188.13	175.28	149.57	48.54	381.23
2016	Anhui	228.778	194.895	229.954	248.772	524.767	234.418	148.09	161.8	214.374	338.538
2017	Anhui	271.596	234.702	309.547	271.318	662.72	260.396	282.596	188.939	322.571	324.476
2018	Anhui	303.83	273.407	309.621	286.375	726.161	220.864	254.704	191.802	299.981	393.785
2019	Anhui	330.29	301.147	341.533	304.139	773.503		314.185	225.115		406.11
2020	Anhui	350.165	323.745	366.145	309.345	737.672		418.397	245.22		408.383
2021	Anhui	384.624	364.428	399.877	300.217	712.54		546.821	267.263		423.617
2022	Anhui	393.321	389.061	368.605	281.369	635.971		470.804	270.334		452.323
2023	Anhui	405.798	403.926	384.57	282.219	658.992		494.573	281.728		450.581
2011	Fujian	61.76	63.28	68.51	77.26	46.12			76.87		44.5
2012	Fujian	123.21	112.74	140.25	100.51	169.52			132.49		126.79
2013	Fujian	183.1	157.43	194.12	130.14	436.21	60.94		122.6		247.85
2014	Fujian	202.59	204.22	164.85	181.25	457.02	161.83	37.59	124.93		265.76
2015	Fujian	245.21	226.6	198.23	230.19	396.13	198.59	140.07	185.79	62.59	392.01
2016	Fujian	252.671	240.466	245.125	287.164	566.684	249.596	137.357	180.462	228.429	306.701
2017	Fujian	299.282	275.401	334.329	309.034	704.796	292.683	300.314	210.302	340.227	314.469
2018	Fujian	334.436	312.313	334.296	324.726	748.451	233.932	282.487	215.678	325.323	407.758
2019	Fujian	360.509	340.652	363.728	335.157	788.301		339.131	247.166		420.248
2020	Fujian	380.126	359.212	401.803	341.225	753.133		494.235	266.994		409.818
2021	Fujian	410.313	394.011	436.06	329.866	744.115		619.291	283.398		417.379
2022	Fujian	420.752	420.568	408.869	305.242	713.853		544.317	279.312		442.983
2023	Fujian	430.447	431.525	422.022	306.102	756.353		552.776	287.682		442.224
2011	Jiangxi	29.74	13.97	54.82	56.7	46.6			58.04		36.21
2012	Jiangxi	91.93	59.82	132.68	75.05	207.3			108		123.92
2013	Jiangxi	146.13	99.81	183.73	102.46	478.45	43.19		93.4		230.78
2014	Jiangxi	175.69	148.73	167.19	154.14	535.69	148.08	44.25	98.59		280.18
2015	Jiangxi	208.35	170.86	182.48	194.78	397.91	182.27	144.49	151.45	48.25	379.14
2016	Jiangxi	223.755	188.788	222.736	242.009	533.272	226.678	129.042	157.104	202.209	341.083
2017	Jiangxi	267.168	228.52	305.918	261.956	672.551	257.497	272.231	182.364	327.533	324.382
2018	Jiangxi	296.228	266.463	296.518	273.503	688.642	209.01	240.487	186.824	296.593	394
2019	Jiangxi	319.13	294.322	319.183	288.487	711.197		288.252	213.151		400.969
2020	Jiangxi	340.611	316.135	353.232	295.462	690.899		419.536	232.879		398.516
2021	Jiangxi	372.174	353.625	384.475	287.59	667.228		533.36	255.96		411.092
2022	Jiangxi	378.829	373.568	354.51	270.277	608.566		453.164	258.469		440.416
2023	Jiangxi	389.503	385.589	370.439	273.867	646.88		470.405	267.92		437.09
2011	Shandong	38.55	33.67	47.16	44.24	9.07			63.38		39.01
2012	Shandong	100.35	80.15	127.53	61.65	176.43			114.51		117.68
2013	Shandong	159.3	122.01	189.07	89.87	483.75	45.87		101.22		228.32
2014	Shandong	181.88	169.89	161.19	142.07	511.64	151.85	49.31	91.92		259.08
2015	Shandong	220.66	192.11	178.15	186.17	372.83	187.49	165.04	141.22	33.02	392.16
2016	Shandong	232.566	209.796	217.811	235.542	488.045	228.825	145.3	154.327	196.471	334.577
2017	Shandong	272.059	247.188	290.925	248.978	619.981	244.434	282.613	180.273	257.853	319.918
2018	Shandong	301.13	281.99	287.852	263.139	653.12	200.624	245.072	179.462	293.133	388.476
2019	Shandong	327.361	309.971	318.538	279.693	703.741		294.692	214.596		400.836
2020	Shandong	347.806	331.656	343.487	287.677	673.673		394.056	234.729		409.002
2021	Shandong	380.683	367.59	381.021	279.927	677.94		517.48	259.349		423.328
2022	Shandong	390.376	392.525	352.004	260.106	605.343		446.781	263.063		453.032
2023	Shandong	404.788	407.763	373.272	263.43	671.686		468.447	271.015		452.259
2011	Henan	28.4	13.54	38.11	38.37	0.25			53.88		59.81
2012	Henan	83.68	61.93	98.07	61.8	104.06			99.63		129.37
2013	Henan	142.08	105.06	155.23	87.45	395.02	31.51		83.51		240.42
2014	Henan	166.65	157.52	132.24	137.08	415.49	136.22	23.47	84.05		259.31
2015	Henan	205.34	181.5	151.05	174.98	307.69	171.16	127.15	130.9	15.71	382.73
2016	Henan	223.123	200.646	199.216	226.018	446.657	219.758	113.258	146.679	195.953	340.796
2017	Henan	266.924	241.449	279.56	247.487	584.251	242.808	258.814	170.344	300.212	328.092
2018	Henan	295.756	278.456	275.745	269.681	627.453	205.034	217.075	178.315	281.954	389.265
2019	Henan	322.121	309.343	301.852	293.004	654.001		260.81	214.631		401.162
2020	Henan	340.813	331.165	321.21	298.936	602.409		343.53	239.883		408.316
2021	Henan	374.374	366.972	362.199	284.784	588.27		482.168	266.77		420.965
2022	Henan	382.395	392.906	328.173	266.859	527.002		390.281	265.12		446.238
2023	Henan	396.818	405.351	356.072	273.533	593.16		429.765	278.156		442.707
2011	Hubei	39.82	35.17	53.56	69.15	44.82			55.47		30.18
2012	Hubei	101.42	82.06	125.84	90.83	173.75			109.77		121
2013	Hubei	164.76	123.74	197.04	111.2	511.31	53.97		99.5		241.51
2014	Hubei	190.14	176.61	175.7	165.88	548.79	162.44	59.01	99.75		261.07
2015	Hubei	226.75	199.53	189.08	210.98	396.45	196.58	168.41	146.92	57.81	385.07
2016	Hubei	239.855	215.55	233.412	264.868	530.704	241.567	158.886	159.413	210.134	331.833
2017	Hubei	285.277	253.629	317.581	290.346	652.844	269.865	311.247	192.904	317.58	331.095
2018	Hubei	319.477	292.558	322.443	307.65	705.244	226.212	298.139	199.526	310.685	402.991
2019	Hubei	344.403	320.788	348.533	318.557	733.517		352.248	230.64		414.891
2020	Hubei	358.636	336.541	369.58	308.96	672.098		478.205	241.334		411.729
2021	Hubei	391.902	374.321	408.737	305.148	684.315		599.859	266.654		419.384
2022	Hubei	398.81	395.144	381.059	286.345	627.673		529.845	268.054		443.198
2023	Hubei	411.33	407.275	401.346	288.595	691.338		547.956	277.401		442.888
2011	Hunan	32.68	15.33	60.73	53.36	51.76			65.29		39.02
2012	Hunan	93.71	63.39	132.38	75.16	204.99			108.49		123.56
2013	Hunan	147.71	103.46	175	100.22	454.11	34.87		90.4		244.25
2014	Hunan	167.27	150.42	153.46	148.44	479.47	139.81	40.84	94.02		247.99
2015	Hunan	206.38	170.07	174.47	186.49	371.97	171.84	150.14	143.89	34.65	384.24
2016	Hunan	217.691	186.133	219.802	233.876	517.19	216.155	130.902	158.564	198.541	318.074
2017	Hunan	261.118	223.473	297.699	248.517	641.338	246.384	280.064	181.953	290.213	318.964
2018	Hunan	286.809	258.069	286.552	248.242	653.406	192.383	246.432	178.89	290.132	382.193
2019	Hunan	310.85	282.28	311.812	272.33	690.355		296.921	203.994		403.463
2020	Hunan	332.035	302.281	347.444	281.539	672.24		431.401	222.623		402.302
2021	Hunan	362.365	338.787	377.362	267.289	649.389		542.725	244.99		412.988
2022	Hunan	371.949	362.191	353.4	252.797	591.301		470.852	253.898		437.899
2023	Hunan	381.259	372.798	367.028	250.415	631.668		491.177	257.698		435.075
2011	Guangdong	69.48	63.41	80.97	59.96	50.69			95.96		68.66
2012	Guangdong	127.06	111.37	149.38	81.73	153.26			155.34		138.31
2013	Guangdong	184.78	153.33	208.44	106.47	466.62	59.28		137.12		245.61
2014	Guangdong	201.53	199.63	175.04	156.69	485.07	159.13	56.45	128.04		255.98
2015	Guangdong	240.95	225.52	195.87	207.36	365.29	194.22	155.49	187.62	55.21	373.79
2016	Guangdong	247.996	240.073	236.499	266.788	516.876	238.178	143.894	181.382	217.877	295.065
2017	Guangdong	296.168	275.913	328.166	288.57	676.584	267.2	297.052	209.908	358.261	304.92
2018	Guangdong	331.918	312.442	329.93	305.537	733.018	215.647	282.154	214.136	332.899	399.859
2019	Guangdong	360.608	339.984	364.498	321.681	788.904		342.188	250.381		421.661
2020	Guangdong	379.535	356.941	404.353	329.03	757.804		505.981	267.803		409.062
2021	Guangdong	406.531	386.371	438.127	325.199	761.56		624.83	277.864		415.707
2022	Guangdong	416.359	413.306	405.569	302.175	681.484		555.317	277.056		446.072
2023	Guangdong	426.476	423.772	418.986	303.455	730.889		556.827	284.636		449.04
2011	Guangxi	33.89	19.98	44.06	52.17	42.03			44		61.33
2012	Guangxi	89.35	66.47	104.58	69.07	142.54			92.72		137.25
2013	Guangxi	141.46	106.97	153.84	99.06	417	20.3		72.55		232.82
2014	Guangxi	166.12	154.29	139.98	139.02	449.06	115.7	36.92	82.67		252.66
2015	Guangxi	207.23	176.33	153.46	177.23	341.68	145.27	108.67	133.25	38.33	406.94
2016	Guangxi	223.325	193.514	202.207	227.417	476.797	200.458	101.204	149.011	210.694	360.146
2017	Guangxi	261.938	232.734	279.516	244.556	601.914	230.966	247.059	174.665	293.37	326.443
2018	Guangxi	289.248	270.406	272.494	258.816	629.05	176.501	206.85	177.77	297.425	381.929
2019	Guangxi	309.913	295.256	292.478	275.081	667.029		240.814	198.273		390.011
2020	Guangxi	325.171	311.985	313.241	279.421	618.874		344.612	215.71		390.407
2021	Guangxi	355.114	342.81	351.839	263.987	597.153		478.446	239.212		401.713
2022	Guangxi	362.024	363.786	323.47	246.683	554.93		391.662	239.3		426.286
2023	Guangxi	369.937	371.175	339.584	242.895	567.566		426.826	251.921		421.029
2011	Hainan	45.56	30.96	57.74	60.56	61.02			56.06		71.63
2012	Hainan	102.94	79.51	120.72	87.09	169.69			104.05		147.98
2013	Hainan	158.26	121.75	173.37	110.76	468.48	32.71		80.81		251.39
2014	Hainan	179.62	170.99	153.8	157.71	529.76	136.61	42.99	71.93		255.03
2015	Hainan	230.33	192.26	184.91	195.59	438.8	164.35	163.58	128.84	57.04	438.59
2016	Hainan	231.559	210.091	220.348	232.993	562.515	203.505	140.084	134.72	208.297	322.835
2017	Hainan	275.64	253.391	297.535	247.672	656.856	237.259	292.466	171.452	279.198	309.335
2018	Hainan	309.718	294.403	300.233	265.845	683.325	183.765	268.652	184.313	300.74	377.541
2019	Hainan	328.752	319.414	314.457	282.293	701.154		294.018	201.641		385.585
2020	Hainan	344.049	335.866	337.243	287.31	659.709		405.141	215.244		383.458
2021	Hainan	375.354	368.476	377.119	281.05	642.966		536.253	238.411		394.881
2022	Hainan	382.282	392.597	344.976	256.225	584.962		445.174	238.482		416.038
2023	Hainan	390.824	399.009	361.374	247.044	624.035		472.837	251.595		417.335
2011	Chongqing	41.89	40.38	47.46	59.24	57.04			42.14		36.77
2012	Chongqing	100.02	85.39	116.14	89.6	180.84			92.12		119.05
2013	Chongqing	159.86	125.27	178.2	113.4	471.66	35.23		86.97		240.74
2014	Chongqing	184.71	175.57	157.88	158.33	514.01	141.85	34.8	92.5		263.63
2015	Chongqing	221.84	197.46	171.58	191.7	395.35	168.62	137.05	132.4	44.92	393.65
2016	Chongqing	233.888	214.028	211.536	236.066	508.191	209.842	120.024	147.529	202.764	340.099
2017	Chongqing	276.306	249.504	301.206	246.619	621.743	233.377	285.954	179.453	360.078	319.574
2018	Chongqing	301.532	285.109	285.596	261.95	622.314	181.256	255.201	178.406	311.211	384.739
2019	Chongqing	325.471	311.031	310.364	272.383	685.775		293.352	203.747		400.622
2020	Chongqing	344.764	329.386	343.906	274.101	689.031		413.423	219.241		397.125
2021	Chongqing	373.223	362.235	373.57	259.214	668.689		528.098	242.489		408.899
2022	Chongqing	382.226	386.299	346.287	240.397	623.327		451.477	245.034		434.105
2023	Chongqing	395	400.09	365.566	245.383	657.336		471.701	255.657		431.706
2011	Sichuan	40.16	29.02	58.56	45.49	73.61			53.74		43.5
2012	Sichuan	100.13	74.36	126.5	78.66	179.64			109.68		137.31
2013	Sichuan	153.04	114.03	176.71	102.38	445.78	35.62		96.41		238.82
2014	Sichuan	173.82	162.58	159.82	149.32	499.44	140.04	46.33	96.92		236.39
2015	Sichuan	215.48	182.08	176.54	190.6	378.83	168.17	152.43	141.43	48.59	396.51
2016	Sichuan	225.415	196.999	216.544	237.793	492.85	213.791	135.371	154.356	209.481	335.376
2017	Sichuan	267.797	231.867	301.535	245.242	620.249	237.718	298.899	181.944	321.859	325.143
2018	Sichuan	294.304	266.148	295.834	256.251	656.639	188.357	275.92	177.181	309.527	384.514
2019	Sichuan	317.11	291.216	319.533	274.154	705.329		320.67	201.322		398.229
2020	Sichuan	334.823	310.763	344.862	277.904	660.949		431.17	220.401		396.046
2021	Sichuan	363.608	342.964	375.6	264.749	645.062		548.917	241.429		410.001
2022	Sichuan	371.611	363.226	352.639	249.172	601.708		478.875	246.033		433.796
2023	Sichuan	384.113	375.673	370.482	251.575	658.001		492.292	255.662		436.775
2011	Guizhou	18.47	3.06	27.51	49.21	47.38			16.79		52.92
2012	Guizhou	75.87	49.87	89.92	79.69	155.99			63.49		136.21
2013	Guizhou	121.22	89.59	125.46	100.53	384.99	0		41		217.93
2014	Guizhou	154.62	139.9	114.08	126.53	421.51	95.77	10.18	55.52		276.9
2015	Guizhou	193.29	160.98	132.74	155.83	345.19	119.99	99.82	95.4	17.94	410.01
2016	Guizhou	209.455	180.704	182.696	190.358	479.22	168.131	74.2613	131.028	184.709	353.029
2017	Guizhou	251.457	227.771	258.442	207.599	594.733	201.569	226.995	157.082	246.538	316.99
2018	Guizhou	276.91	267.389	241.335	220.884	575.718	144.551	163.712	161.928	276.392	373.01
2019	Guizhou	293.511	292.656	245.662	239.926	597.006		159.878	172.656		383.304
2020	Guizhou	307.937	313.245	258.2	246.717	571.727		215.782	188.986		380.808
2021	Guizhou	340.798	345.734	302.402	226.475	535.298		372.174	217.672		394.289
2022	Guizhou	344.682	365.723	271.307	213.378	497.941		262.777	220.213		408.561
2023	Guizhou	359.516	379.222	300.496	213.028	525.195		335.941	236.419		401.722
2011	Yunnan	24.91	7.47	48.39	55.11	82.08			33.58		39.81
2012	Yunnan	84.43	52.78	111.96	75.43	177.58			88.67		138.91
2013	Yunnan	137.9	95.59	153.55	97.13	413.08	26.56		72.86		249.15
2014	Yunnan	164.05	147.22	144.3	134.42	475.79	123.72	35.1	82.03		255.54
2015	Yunnan	203.76	167.96	158.79	168.47	383.48	144.2	126.27	122.14	27.86	403.67
2016	Yunnan	217.338	185.374	203.167	206.683	501.833	186.391	116.025	141.408	190.332	348.645
2017	Yunnan	256.273	223.536	282.855	217.82	604.278	211.185	296.569	164.674	261.549	316.085
2018	Yunnan	285.791	262.285	278.836	228.887	622.582	161.745	266.646	166.044	288.613	376.06
2019	Yunnan	303.461	284.43	291.121	243.388	647.403		281.574	185.35		388.744
2020	Yunnan	318.478	302.461	309.453	255.609	605.031		363.326	205.038		387.785
2021	Yunnan	346.931	335.343	342.002	237.123	577.12		484.852	226.914		394.171
2022	Yunnan	354.706	358.958	313.56	220.553	535.511		394.949	227.879		415.459
2023	Yunnan	366.841	371.876	333.511	222.114	564.407		441.183	238.687		410.802
2011	Tibet	16.22	3.37	30.16	0	66.3			18.46		33.33
2012	Tibet	68.53	32.86	71.07	16.85	164.95			37.98		181.65
2013	Tibet	115.1	74.09	112.84	63.75	363.27	21.4		29.17		254.65
2014	Tibet	143.91	126.67	108.76	113.51	450.07	126.67	19.73	21.11		264.7
2015	Tibet	186.38	139.87	157.75	168.77	447.65	160.9	131.77	87.66	22.33	391.97
2016	Tibet	204.733	167.206	202.534	210.12	537.694	197.95	141.094	113.148	163.392	332.656
2017	Tibet	245.57	209.292	273.786	219.804	596.147	226.333	297.582	146.691	239.675	314.097
2018	Tibet	274.334	249.82	267.164	234.361	582.08	190.52	262.266	152.564	278.338	368.328
2019	Tibet	293.791	271.143	293.21	249.166	643.681		311.703	170.017		369.648
2020	Tibet	310.529	290.177	319.379	262.927	598.329		425.108	190.743		361.669
2021	Tibet	342.1	322.866	359.154	250.484	576.899		553.01	217.421		374.639
2022	Tibet	334.686	328.573	311.691	210.305	472.526		465.92	201.86		396.68
2023	Tibet	356.296	357.577	332.37	209.869	557.078		465.863	220.884		395.567
2011	Shaanxi	40.96	37.81	29.74	34.44	26.16			30.71		71.74
2012	Shaanxi	98.24	83.62	98.61	58.38	141.46			85.23		145.88
2013	Shaanxi	148.37	123.6	145.94	78.61	399.93	23.61		68		234.55
2014	Shaanxi	178.73	173.25	139	122.05	472.64	131.49	32.45	72.71		269
2015	Shaanxi	216.12	194.92	157.95	162.76	355.33	161.98	142.39	116.87	35.15	391.85
2016	Shaanxi	229.367	211.174	202.873	213.117	471.154	203.41	128.317	140.55	195.168	337.596
2017	Shaanxi	266.846	246.482	276	226.874	586.202	221.871	276.761	166.684	253.097	317.467
2018	Shaanxi	295.948	281.052	277.149	253.229	609.527	181.85	243.874	173.954	295.987	379.311
2019	Shaanxi	322.891	308.211	309.144	279.69	660.364		295.753	209.576		396.364
2020	Shaanxi	342.042	329.532	331.73	285.889	628.697		389.761	227.287		402.11
2021	Shaanxi	374.157	364.117	371.218	271.872	619.509		526.088	253.121		412.672
2022	Shaanxi	381.293	384.933	342.775	253.174	570.116		446.645	252.713		439.291
2023	Shaanxi	398.06	399.436	372.4	258.327	663.014		471.798	268.458		440.17
2011	Gansu	18.84	4.99	12.76	10.82	6.48			15.59		75.61
2012	Gansu	76.29	54.72	68.98	36.32	117.06			52.57		160.79
2013	Gansu	128.39	96.77	114.2	69.51	357.1	3.33		36.43		258.6
2014	Gansu	159.76	148.1	107.29	111.91	426.42	110.28	11.49	35.84		293.6
2015	Gansu	199.78	169.67	125.25	142.62	319.06	130.5	107.17	84.74	6.12	434.64
2016	Gansu	204.111	189.285	172.656	182.095	434.025	172.073	99.6972	111.112	170.028	310.238
2017	Gansu	243.78	227.384	240.385	196.938	526.799	191.334	243.434	132.773	237.382	304.1
2018	Gansu	266.823	261.29	227.515	207.77	511.717	145.809	189.662	142.634	254.096	356.539
2019	Gansu	289.14	287.311	251.742	236.244	558.188		216.911	171.545		363.157
2020	Gansu	305.5	308.87	265.346	250.225	515.021		271.338	194.522		367.356
2021	Gansu	341.158	344.36	308.636	230.326	480.461		427.058	224.091		389.707
2022	Gansu	345.218	361.066	281.441	212.299	427.563		346.348	226.444		408.801
2023	Gansu	362.621	374.69	314.164	217.537	499.381		397.005	244.108		410.846
2011	Qinghai	18.33	1.96	6.76	0	21.99			1.16		93.42
2012	Qinghai	61.47	47.12	51.85	16.33	136.35			20.57		126.3
2013	Qinghai	118.01	88.18	113.42	63.67	389.3	3.26		22.35		224.82
2014	Qinghai	145.93	139.24	108.4	109.16	443.05	111.57	22.21	24.58		236.23
2015	Qinghai	195.15	159.59	136.5	143.26	357.89	135.74	125.92	85.05	4.95	419.14
2016	Qinghai	200.382	177.731	182.265	181.722	457.669	173.699	112.726	118.711	165.837	308.106
2017	Qinghai	240.203	215.675	251.093	189.506	534.905	195.472	278.411	135.864	232.678	301.422
2018	Qinghai	263.124	251.689	235.313	194.597	505.293	148.52	226.628	141.357	258.523	351.433
2019	Qinghai	282.646	272.897	252.746	222.004	535.427		243.298	168.217		369.187
2020	Qinghai	298.227	292.063	264.667	239.047	507.858		280.299	191.306		379.582
2021	Qinghai	329.889	325.516	300.326	217.133	469.613		410.126	218.585		398.07
2022	Qinghai	329.753	340.822	260.568	191.474	388.822		314.561	212.242		418.944
2023	Qinghai	351.078	357.56	302.251	202.66	481.214		385.11	232.325		418.422
2011	Ningxia	31.31	32.27	23.16	15.68	41.09			16.51		42.96
2012	Ningxia	87.13	76.78	90.34	40.51	158.36			67.53		115.46
2013	Ningxia	136.74	115.08	129.02	44.5	399.35	3.37		46.74		222.32
2014	Ningxia	165.26	167.18	114.28	111.45	446.04	111.85	14.42	41.97		251.55
2015	Ningxia	214.7	190.35	134.87	149.39	364.97	135.96	104.12	90.12	9.68	440.18
2016	Ningxia	212.356	205.917	179.619	191.982	461.677	174.416	91.8014	118.946	179.541	293.115
2017	Ningxia	255.588	242.416	252.208	189.871	552.148	185.655	239.445	138.206	310.56	305.24
2018	Ningxia	272.923	274.252	225.275	207.534	522.087	133.389	168.321	144.758	268.429	355.139
2019	Ningxia	292.312	299.044	241.548	227.62	545.372		196.39	166.491		362.349
2020	Ningxia	310.016	320.451	262.722	250.051	518.829		255.276	194.627		361.516
2021	Ningxia	344.862	355.277	305.29	232.893	478.35		416.537	222.195		382.402
2022	Ningxia	356.626	384.542	278.228	215.99	425.923		327.258	229.076		406.935
2023	Ningxia	373.641	400.159	310.454	217.104	480.776		393.281	245.6		400.919
2011	Xinjiang	20.34	12.92	23.6	21.47	51.84			12.05		38.92
2012	Xinjiang	82.45	60.88	85.14	46.28	159.44			58.5		148.76
2013	Xinjiang	143.4	101.44	146.39	76.03	422.5	24.01		59.57		276.48
2014	Xinjiang	163.67	151.28	134.87	133.48	487.16	134.97	39.1	50.72		256.91
2015	Xinjiang	205.49	172.01	148.6	165.46	397.95	155.11	125.97	92.83	10.14	419.4
2016	Xinjiang	208.722	190.324	190.111	197.219	490.816	189.52	130.237	112.289	155.407	303.306
2017	Xinjiang	248.688	228.819	249.099	196.683	539.016	203.001	279.763	131.99	209.858	313.562
2018	Xinjiang	271.84	267.351	232.937	209.696	491.326	157.371	231.078	135.862	254.815	357.37
2019	Xinjiang	294.341	293.483	256.309	232.35	557.774		251.995	160.134		366.301
2020	Xinjiang	308.349	310.218	273.854	239.3	498.32		344.439	178.004		364.882
2021	Xinjiang	341.768	345.924	313.191	230.212	463.793		468.952	209.611		379.993
2022	Xinjiang	342.659	364.456	268.693	200.99	378.644		347.496	208.847		405.115
2023	Xinjiang	360.806	381.625	298.946	205.124	468.676		376.201	229.632		404.49
