# Supplementary material
Source: Research Square preprint supplement (doi:10.21203/rs.3.rs-9391188/v1)
Supplement: Supplementary file 4 [file 99e20a3addf34009062f9231.xlsx]

## Sheet: Sheet4
id	year	prov	d	rgdp	gov	ind	agri	edu	hum
1	2011	Beijing	0.321087	11.3103	0.199683	2.77705	8.50956	8.99342	6.99402
1	2012	Beijing	0.396459	11.3791	0.20612	2.78172	8.61359	9.29631	7.01688
1	2013	Beijing	0.474045	11.4579	0.210782	2.78765	8.69618	8.83648	7.03632
1	2014	Beijing	0.46972	11.5129	0.212119	2.79276	8.76966	9.21587	7.04036
1	2015	Beijing	0.522401	11.5759	0.249307	2.8103	8.82409	9.2978	7.05996
1	2016	Beijing	0.521229	11.6801	0.24959	2.81787	8.87291	9.30444	7.07969
1	2017	Beijing	0.558935	11.7675	0.243603	2.82287	8.9114	9.66026	7.0828
1	2018	Beijing	0.624578	11.8509	0.246419	2.82727	8.9301	9.37663	7.08137
1	2019	Beijing	0.548487	12.009	0.209441	2.83366	8.92132	9.4089	7.07623
1	2020	Beijing	0.582803	12.013	0.19711	2.8343	8.92079	9.48985	7.05962
1	2021	Beijing	0.589478	12.1226	0.178922	2.81455	8.91959	9.73246	7.05445
1	2022	Beijing	0.622205	12.1564	0.1795	2.83489	8.92306	9.91497	7.03174
1	2023	Beijing	0.599775	12.2075	0.182155	2.84606	8.92292	10.0975	7.02909
2	2011	Tianjin	0.291755	11.3529	0.158865	2.50222	7.81238	8.06768	6.51767
2	2012	Tianjin	0.36368	11.4422	0.166219	2.51014	8.04238	8.10264	6.54103
2	2013	Tianjin	0.412492	11.514	0.176513	2.52577	8.54364	8.29644	6.56667
2	2014	Tianjin	0.431333	11.5639	0.183424	2.53639	8.81626	8.33916	6.57647
2	2015	Tianjin	0.462118	11.5895	0.195448	2.5575	9.09583	8.30841	6.57647
2	2016	Tianjin	0.45996	11.6531	0.206841	2.59008	9.34216	8.30996	6.5582
2	2017	Tianjin	0.488118	11.6864	0.176964	2.60628	9.41679	8.44376	6.52796
2	2018	Tianjin	0.512999	11.7012	0.164977	2.61192	9.42489	8.68285	6.51026
2	2019	Tianjin	0.506568	11.4117	0.252101	2.62164	9.361	8.72911	6.49072
2	2020	Tianjin	0.522447	11.5289	0.223758	2.61933	9.34531	8.24229	6.47235
2	2021	Tianjin	0.542215	11.6416	0.200863	2.60443	9.311	8.552	6.46303
2	2022	Tianjin	0.543258	11.6889	0.167358	2.5953	9.28415	8.49372	6.43133
2	2023	Tianjin	0.535295	11.7179	0.195995	2.61047	9.26132	8.43544	6.45362
3	2011	Hebei	0.388671	10.4332	0.14429	2.26671	10.0612	8.04614	8.31557
3	2012	Hebei	0.512746	10.5074	0.153506	2.27428	10.4376	8.15349	8.30968
3	2013	Hebei	0.583897	10.569	0.155033	2.28019	11.0039	8.03425	8.30202
3	2014	Hebei	0.594005	10.5962	0.158977	2.29365	11.3155	8.0949	8.28853
3	2015	Hebei	0.641819	10.603	0.188961	2.32873	11.4338	7.99128	8.27563
3	2016	Hebei	0.637135	10.6704	0.188633	2.35038	11.5909	7.8613	8.26127
3	2017	Hebei	0.663854	10.723	0.195176	2.37867	11.6525	8.07991	8.24144
3	2018	Hebei	0.685933	10.7742	0.214556	2.39741	11.6652	8.01706	8.22657
3	2019	Hebei	0.700589	10.7439	0.236694	2.41591	11.6498	8.22931	8.21663
3	2020	Hebei	0.723074	10.7906	0.249201	2.4023	11.6249	7.77314	8.20822
3	2021	Hebei	0.735037	10.8999	0.219062	2.39559	11.589	8.1565	8.20056
3	2022	Hebei	0.746923	10.9507	0.219626	2.40586	11.6052	8.27072	8.18312
3	2023	Hebei	0.756689	10.9909	0.218601	2.42273	11.6176	8.38494	8.19506
4	2011	Shanxi	0.323242	10.3532	0.210353	2.27274	10.643	8.11722	7.50494
4	2012	Shanxi	0.434096	10.4231	0.227813	2.30355	10.859	8.24984	7.51425
4	2013	Shanxi	0.49335	10.4626	0.239247	2.32599	11.0784	8.27996	7.52564
4	2014	Shanxi	0.514012	10.4651	0.241765	2.35086	11.2282	8.23923	7.51861
4	2015	Shanxi	0.553494	10.4608	0.268121	2.43631	11.3343	8.42554	7.51043
4	2016	Shanxi	0.56539	10.4782	0.26274	2.4507	11.4397	8.51749	7.51316
4	2017	Shanxi	0.585874	10.6469	0.241906	2.44259	11.5065	8.68551	7.50219
4	2018	Shanxi	0.606043	10.7217	0.25472	2.46386	11.5402	8.54651	7.48941
4	2019	Shanxi	0.621648	10.7304	0.276669	2.4625	11.526	8.64138	7.4742
4	2020	Shanxi	0.638121	10.8303	0.289536	2.43728	11.4769	8.46186	7.46049
4	2021	Shanxi	0.655494	11.0794	0.223399	2.38121	11.4526	8.6669	7.44717
4	2022	Shanxi	0.664947	11.2074	0.229169	2.3543	11.4842	8.76891	7.42178
4	2023	Shanxi	0.666716	11.2116	0.246928	2.37321	11.4492	8.87092	7.44073
5	2011	Inner Mongolia	0.318103	10.9677	0.208164	2.29548	9.68806	7.75262	7.23562
5	2012	Inner Mongolia	0.447006	11.0649	0.215735	2.28749	10.0473	7.92175	7.22911
5	2013	Inner Mongolia	0.512346	11.1248	0.217924	2.29463	10.5996	7.81783	7.22257
5	2014	Inner Mongolia	0.534988	11.1711	0.218342	2.3099	11.0809	7.58449	7.21524
5	2015	Inner Mongolia	0.577573	11.1719	0.238508	2.34125	11.2019	7.67228	7.2086
5	2016	Inner Mongolia	0.584365	11.1853	0.248935	2.35595	11.2613	7.75155	7.18992
5	2017	Inner Mongolia	0.602898	11.0629	0.281428	2.38422	11.3127	7.67489	7.18311
5	2018	Inner Mongolia	0.618984	11.1317	0.279449	2.39056	11.2988	7.74707	7.17319
5	2019	Inner Mongolia	0.63481	11.1251	0.296349	2.39058	11.3011	7.8079	7.14835
5	2020	Inner Mongolia	0.650722	11.1853	0.303584	2.36461	11.3085	7.72464	7.12448
5	2021	Inner Mongolia	0.671479	11.3554	0.255412	2.31076	11.2791	7.94615	7.10497
5	2022	Inner Mongolia	0.687129	11.477	0.254234	2.28758	11.2494	7.71153	7.08171
5	2023	Inner Mongolia	0.691732	11.5393	0.277591	2.30246	11.2195	7.47691	7.0992
6	2011	Liaoning	0.34489	10.8349	0.175728	2.27452	9.80284	7.8332	7.76848
6	2012	Liaoning	0.452979	10.9446	0.18347	2.29263	10.003	7.74245	7.7931
6	2013	Liaoning	0.517144	11.0348	0.190989	2.31537	10.293	7.98028	7.83157
6	2014	Liaoning	0.537087	11.0852	0.177475	2.3487	10.6086	7.97583	7.84863
6	2015	Liaoning	0.583542	11.0876	0.156322	2.38386	10.7632	8.01242	7.78734
6	2016	Liaoning	0.574095	10.8355	0.205758	2.43371	10.911	7.98816	7.74117
6	2017	Liaoning	0.594946	10.8879	0.20844	2.44067	11.0208	8.13491	7.73399
6	2018	Liaoning	0.601798	10.9683	0.210849	2.44323	11.0916	8.28202	7.72339
6	2019	Liaoning	0.625393	10.9542	0.230639	2.4435	11.1247	8.16177	7.71352
6	2020	Liaoning	0.641092	10.9831	0.239466	2.44317	11.145	8.04028	7.71021
6	2021	Liaoning	0.659445	11.0825	0.213138	2.42663	11.1143	8.1226	7.69166
6	2022	Liaoning	0.666563	11.1386	0.216097	2.42553	11.0889	8.01479	7.66011
6	2023	Liaoning	0.669728	11.1859	0.21764	2.43605	11.0863	7.90698	7.6454
7	2011	Jilin	0.309422	10.5574	0.208324	2.33508	9.82747	7.83301	7.32974
7	2012	Jilin	0.460226	10.6786	0.206981	2.34243	10.1344	7.95633	7.30652
7	2013	Jilin	0.526046	10.767	0.210388	2.35587	10.5941	7.84313	7.28413
7	2014	Jilin	0.550039	10.823	0.211057	2.36337	10.8571	7.75708	7.26334
7	2015	Jilin	0.590146	10.8413	0.228761	2.36325	11.0877	7.84354	7.24351
7	2016	Jilin	0.59315	10.8943	0.242684	2.40907	11.2488	7.88981	7.2211
7	2017	Jilin	0.616521	10.9121	0.249303	2.43362	11.3546	7.69838	7.19968
7	2018	Jilin	0.633259	10.9261	0.251389	2.43371	11.394	7.80091	7.18084
7	2019	Jilin	0.647355	10.6799	0.335421	2.42786	11.3612	7.9676	7.15929
7	2020	Jilin	0.660888	10.8357	0.335234	2.3941	11.3242	8.07025	7.13966
7	2021	Jilin	0.684389	10.9232	0.279312	2.4017	11.293	8.13956	7.11314
7	2022	Jilin	0.690527	10.9214	0.309407	2.39549	11.2745	7.86636	7.0775
7	2023	Jilin	0.692483	10.9637	0.325681	2.41804	11.2464	7.59316	7.06476
8	2011	Heilongjiang	0.377441	10.3988	0.22207	2.16383	10.0057	7.76735	7.58974
8	2012	Heilongjiang	0.493823	10.4832	0.23164	2.15224	10.3182	7.65506	7.61471
8	2013	Heilongjiang	0.560275	10.5373	0.233082	2.13229	10.8681	7.92757	7.63066
8	2014	Heilongjiang	0.583284	10.5771	0.228349	2.15746	11.1688	7.8459	7.57353
8	2015	Heilongjiang	0.638852	10.5831	0.266557	2.20006	11.2825	7.77931	7.50934
8	2016	Heilongjiang	0.64329	10.6074	0.274751	2.2272	11.4179	7.62602	7.48212
8	2017	Heilongjiang	0.672928	10.6434	0.291843	2.23251	11.4706	7.76744	7.4378
8	2018	Heilongjiang	0.686438	10.6753	0.285837	2.25751	11.4841	7.91654	7.3994
8	2019	Heilongjiang	0.70229	10.4963	0.368154	2.26121	11.4717	8.0538	7.34666
8	2020	Heilongjiang	0.723044	10.6604	0.397811	2.24158	11.4634	8.09593	7.29506
8	2021	Heilongjiang	0.746006	10.7635	0.343084	2.25877	11.4557	8.19713	7.25841
8	2022	Heilongjiang	0.748551	10.8415	0.342871	2.25164	11.414	7.82219	7.2086
8	2023	Heilongjiang	0.74105	10.8506	0.363666	2.28683	11.375	7.44725	7.18463
9	2011	Shanghai	0.329651	11.3213	0.203946	2.57908	8.58896	8.26756	7.00699
9	2012	Shanghai	0.402996	11.3548	0.207317	2.60419	8.89686	8.72093	7.01706
9	2013	Shanghai	0.499641	11.4185	0.207561	2.63154	9.09111	7.11094	7.22177
9	2014	Shanghai	0.508002	11.4863	0.208906	2.64791	9.21184	8.01264	7.21937
9	2015	Shanghai	0.545406	11.5502	0.246445	2.67792	9.25292	8.20817	7.21635
9	2016	Shanghai	0.55041	11.6662	0.245538	2.70559	9.27669	8.56639	7.21909
9	2017	Shanghai	0.587332	11.7491	0.246389	2.70395	9.286	8.40223	7.2245
9	2018	Shanghai	0.600382	11.8129	0.255556	2.70648	9.2822	8.50468	7.22669
9	2019	Shanghai	0.655314	11.9658	0.214368	2.72602	9.25875	8.56418	7.22708
9	2020	Shanghai	0.68145	11.9561	0.209354	2.73119	9.25033	8.6818	7.22548
9	2021	Shanghai	0.600751	12.0647	0.195092	2.73521	9.23893	8.93452	7.21891
9	2022	Shanghai	0.619308	12.1002	0.21036	2.74097	9.23903	9.46886	7.20564
9	2023	Shanghai	0.62548	12.1565	0.204125	2.74999	9.22955	10.0032	7.20415
10	2011	Jiangsu	0.45381	11.0396	0.126689	2.36426	10.7388	7.83501	8.46574
10	2012	Jiangsu	0.562319	11.1324	0.130002	2.3737	10.9961	7.82594	8.47021
10	2013	Jiangsu	0.639377	11.23	0.130511	2.39267	11.1907	8.10693	8.47468
10	2014	Jiangsu	0.667398	11.3129	0.130169	2.40979	11.3271	7.87845	8.47904
10	2015	Jiangsu	0.709693	11.385	0.138164	2.42073	11.4103	7.98909	8.48312
10	2016	Jiangsu	0.713737	11.4813	0.128985	2.44253	11.4698	7.98216	8.48678
10	2017	Jiangsu	0.7563	11.582	0.123688	2.45016	11.4903	7.94302	8.49142
10	2018	Jiangsu	0.759141	11.6542	0.125896	2.45913	11.507	8.01727	8.49431
10	2019	Jiangsu	0.787926	11.7249	0.126201	2.47189	11.4161	8.29277	8.49764
10	2020	Jiangsu	0.829927	11.7055	0.133194	2.47761	11.3015	7.90236	8.49556
10	2021	Jiangsu	0.799439	11.828	0.125341	2.47083	10.883	8.33935	8.48941
10	2022	Jiangsu	0.826445	11.8803	0.121272	2.46912	10.8645	8.55593	8.47741
10	2023	Jiangsu	0.811056	11.9216	0.118874	2.47699	10.8245	8.77251	8.48467
11	2011	Zhejiang	0.405281	10.9895	0.118896	2.39283	10.4897	7.30509	8.12711
11	2012	Zhejiang	0.509738	11.0568	0.120059	2.41068	10.706	7.61582	8.13359
11	2013	Zhejiang	0.546325	11.139	0.125289	2.42144	10.8721	7.68698	8.14206
11	2014	Zhejiang	0.560932	11.1982	0.128434	2.42449	10.98	7.55371	8.14873
11	2015	Zhejiang	0.599964	11.2599	0.154967	2.44495	11.0386	7.64981	8.16195
11	2016	Zhejiang	0.606145	11.3494	0.147599	2.4635	11.0735	7.58186	8.17527
11	2017	Zhejiang	0.631728	11.4302	0.145462	2.48258	11.084	7.86261	8.19229
11	2018	Zhejiang	0.669592	11.4993	0.153558	2.49554	11.0315	7.91203	8.21365
11	2019	Zhejiang	0.680898	11.5864	0.161231	2.51214	10.9169	7.89454	8.2351
11	2020	Zhejiang	0.716779	11.5191	0.156036	2.52551	10.8261	7.76889	8.25765
11	2021	Zhejiang	0.695987	11.6354	0.149826	2.51922	10.7602	8.14599	8.26796
11	2022	Zhejiang	0.72264	11.6826	0.154638	2.5216	10.7231	8.19174	8.26488
11	2023	Zhejiang	0.666393	11.7364	0.149638	2.53222	10.6938	8.23749	8.2741
12	2011	Anhui	0.356123	10.1526	0.215873	2.26772	9.9601	7.23733	8.32383
12	2012	Anhui	0.487433	10.2679	0.23013	2.27569	10.319	7.20062	8.34446
12	2013	Anhui	0.552439	10.3735	0.226201	2.29169	10.6519	7.40249	8.36075
12	2014	Anhui	0.581459	10.4465	0.223711	2.30849	10.8634	7.55649	8.36893
12	2015	Anhui	0.619955	10.4912	0.238076	2.34579	11.0683	7.59365	8.37611
12	2016	Anhui	0.628139	10.5856	0.22628	2.37293	11.2541	7.47241	8.38059
12	2017	Anhui	0.652734	10.6782	0.229618	2.39865	11.3928	7.45237	8.38432
12	2018	Anhui	0.674795	10.7729	0.219022	2.43046	11.5168	7.51923	8.38601
12	2019	Anhui	0.694382	10.9767	0.199176	2.43543	11.559	7.56721	8.38572
12	2020	Anhui	0.70436	11.0576	0.193213	2.43286	11.6027	7.32715	8.08425
12	2021	Anhui	0.732059	11.1608	0.176704	2.43691	11.6276	7.67297	8.07558
12	2022	Anhui	0.751886	11.2064	0.186031	2.44001	11.6473	7.82952	8.06338
12	2023	Anhui	0.725511	11.2494	0.183708	2.45027	11.6578	7.98607	8.06809
13	2011	Fujian	0.365987	10.7659	0.12518	2.31349	9.34627	7.63804	7.68754
13	2012	Fujian	0.454168	10.8736	0.132349	2.31727	9.65963	7.64186	7.69712
13	2013	Fujian	0.513925	10.9707	0.14033	2.32031	9.96289	7.54023	7.69621
13	2014	Fujian	0.530692	11.0584	0.13746	2.32337	10.1778	7.41875	7.70481
13	2015	Fujian	0.568598	11.1268	0.154026	2.3437	10.3272	7.50091	7.72091
13	2016	Fujian	0.581023	11.2213	0.148397	2.35919	10.4327	7.23918	7.7178
13	2017	Fujian	0.60662	11.3227	0.145551	2.38774	10.5508	7.47177	7.71244
13	2018	Fujian	0.613303	11.4208	0.134976	2.38984	10.618	7.4911	7.70616
13	2019	Fujian	0.633102	11.5819	0.119777	2.40329	10.6442	7.5489	7.70075
13	2020	Fujian	0.645911	11.5695	0.118807	2.41227	10.659	7.46748	7.69894
13	2021	Fujian	0.658336	11.6694	0.106631	2.4125	10.6656	8.01842	7.69485
13	2022	Fujian	0.659735	11.7506	0.107159	2.43436	10.6797	8.01779	7.68432
13	2023	Fujian	0.656225	11.7743	0.107798	2.44068	10.6611	8.01716	7.69257
14	2011	Jiangxi	0.329003	10.1716	0.21658	2.22491	9.64943	7.87302	7.77402
14	2012	Jiangxi	0.45371	10.2681	0.233165	2.23704	9.86993	7.88595	7.76811
14	2013	Jiangxi	0.508035	10.3713	0.240823	2.24875	10.2249	8.15442	7.76726
14	2014	Jiangxi	0.534321	10.4537	0.247075	2.26651	10.4803	7.94078	7.76132
14	2015	Jiangxi	0.56568	10.5112	0.263849	2.29703	10.6914	7.77525	7.75705
14	2016	Jiangxi	0.578097	10.6066	0.249603	2.32998	10.8965	7.71503	7.75448
14	2017	Jiangxi	0.608727	10.6788	0.255493	2.35108	11.0692	7.8522	7.74803
14	2018	Jiangxi	0.624808	10.7671	0.257793	2.39094	11.1639	7.90977	7.73849
14	2019	Jiangxi	0.641344	10.8811	0.257974	2.39451	11.1709	8.0027	7.73105
14	2020	Jiangxi	0.659593	10.9485	0.259778	2.39509	11.2111	7.66407	7.72489
14	2021	Jiangxi	0.67909	11.0907	0.228864	2.39993	11.2322	8.17173	7.71512
14	2022	Jiangxi	0.682241	11.1694	0.227253	2.41001	11.2719	8.21627	7.69303
14	2023	Jiangxi	0.679137	11.1735	0.232697	2.42214	11.2753	8.26081	7.71021
15	2011	Shandong	0.408153	10.765	0.11027	2.29699	10.9524	7.5637	8.68525
15	2012	Shandong	0.540513	10.8545	0.118059	2.3163	11.1723	7.6957	8.68135
15	2013	Shandong	0.616855	10.9488	0.121107	2.33415	11.5404	7.72041	8.67249
15	2014	Shandong	0.646874	11.0166	0.120776	2.35177	11.7972	7.84109	8.66527
15	2015	Shandong	0.68133	11.0693	0.130948	2.37382	11.9401	7.64174	8.66095
15	2016	Shandong	0.682436	11.138	0.128707	2.40054	12.0616	7.76776	8.65312
15	2017	Shandong	0.723186	11.1956	0.127466	2.4193	12.1561	7.7133	8.64699
15	2018	Shandong	0.737002	11.242	0.132091	2.43848	12.2179	7.63252	8.63426
15	2019	Shandong	0.764874	11.1655	0.15112	2.45555	12.2466	7.68795	8.62353
15	2020	Shandong	0.785827	11.1865	0.153612	2.46173	12.372	7.49344	8.61432
15	2021	Shandong	0.80221	11.3111	0.14096	2.45831	12.4049	7.75729	8.60795
15	2022	Shandong	0.829493	11.3621	0.138716	2.46156	12.3959	7.76758	8.58261
15	2023	Shandong	0.779092	11.4161	0.136656	2.46779	12.3448	7.77787	8.58858
16	2011	Henan	0.388672	10.2633	0.157767	2.21272	10.4192	7.80762	8.54267
16	2012	Henan	0.516551	10.3577	0.169139	2.23359	10.6994	7.79045	8.53895
16	2013	Henan	0.600962	10.4403	0.173411	2.25236	11.1718	7.86561	8.53582
16	2014	Henan	0.618975	10.5206	0.172553	2.27357	11.4742	7.9312	8.53346
16	2015	Henan	0.667134	10.5745	0.183755	2.29946	11.6693	7.84711	8.53208
16	2016	Henan	0.676961	10.659	0.184171	2.32635	11.8358	7.74662	8.52754
16	2017	Henan	0.710673	10.7509	0.1844	2.34815	11.9728	7.93031	8.52298
16	2018	Henan	0.738539	10.8228	0.191813	2.386	12.0821	8.02903	8.51559
16	2019	Henan	0.754735	10.94	0.187322	2.39858	12.1314	8.05266	8.50391
16	2020	Henan	0.77366	10.923	0.188604	2.39312	12.1617	7.58092	8.49372
16	2021	Henan	0.801541	10.9922	0.166153	2.4004	12.1794	8.14206	8.48467
16	2022	Henan	0.820001	11.0366	0.173555	2.42282	12.2014	8.1376	8.47261
16	2023	Henan	0.801751	11.0033	0.186912	2.4437	12.1826	8.13314	8.48219
17	2011	Hubei	0.350952	10.4399	0.163748	2.26264	9.85419	7.72774	8.1277
17	2012	Hubei	0.473948	10.5603	0.168976	2.26952	10.1968	7.76697	8.13094
17	2013	Hubei	0.546405	10.6649	0.176334	2.30595	10.5444	7.81463	8.13271
17	2014	Hubei	0.561545	10.761	0.180215	2.32685	10.749	7.67238	8.13388
17	2015	Hubei	0.600591	10.8328	0.20754	2.34783	10.9324	7.71467	8.13094
17	2016	Hubei	0.604952	10.9271	0.19663	2.36018	11.1527	7.70908	8.12711
17	2017	Hubei	0.630816	11.0054	0.191703	2.38844	11.3324	7.63902	8.12534
17	2018	Hubei	0.654933	11.1067	0.184377	2.41292	11.466	7.9123	8.12474
17	2019	Hubei	0.690488	11.2566	0.173915	2.42015	11.502	7.80337	8.12415
17	2020	Hubei	0.682587	11.2177	0.194342	2.43727	11.5492	7.77536	8.08979
17	2021	Hubei	0.699663	11.3669	0.158632	2.42899	11.5905	8.27153	8.09743
17	2022	Hubei	0.736513	11.4302	0.160489	2.43577	11.6437	8.05351	8.08425
17	2023	Hubei	0.711922	11.4673	0.166639	2.45591	11.6853	7.83549	8.08764
18	2011	Hunan	0.365481	10.3049	0.178995	2.27446	9.40788	7.91442	8.29531
18	2012	Hunan	0.492047	10.4187	0.185924	2.28976	9.78075	7.83632	8.29887
18	2013	Hunan	0.563179	10.5171	0.190519	2.31655	10.14	8.12257	8.30312
18	2014	Hunan	0.585755	10.6034	0.185572	2.3367	10.5103	8.16951	8.30502
18	2015	Hunan	0.628084	10.6632	0.19821	2.36362	10.8027	8.14521	8.28911
18	2016	Hunan	0.638653	10.7447	0.200916	2.39154	11.0775	8.21674	8.27395
18	2017	Hunan	0.665915	10.8109	0.202619	2.42484	11.3145	8.3117	8.24728
18	2018	Hunan	0.693502	10.8771	0.205338	2.44749	11.4831	8.18381	8.22646
18	2019	Hunan	0.711545	10.9602	0.202113	2.43109	11.5713	8.26396	8.20699
18	2020	Hunan	0.72817	11.0493	0.201121	2.41191	11.6387	7.88783	8.0956
18	2021	Hunan	0.749269	11.1482	0.180741	2.42033	11.6771	8.4048	8.08887
18	2022	Hunan	0.761875	11.2064	0.184745	2.43012	11.7043	8.47113	8.07683
18	2023	Hunan	0.757609	11.2377	0.191573	2.43884	11.7251	8.53746	8.08271
19	2011	Guangdong	0.437415	10.8358	0.126149	2.41086	9.20402	8.02398	8.71391
19	2012	Guangdong	0.51607	10.8985	0.129457	2.42519	9.60062	8.00183	8.72762
19	2013	Guangdong	0.59016	10.9825	0.13463	2.4385	10.1538	7.97972	8.74401
19	2014	Guangdong	0.613307	11.0583	0.134975	2.44248	10.3627	7.84569	8.76842
19	2015	Guangdong	0.626884	11.1199	0.176176	2.46083	10.5097	8.19722	8.78966
19	2016	Guangdong	0.644179	11.212	0.166299	2.48273	10.6206	8.04642	8.81031
19	2017	Guangdong	0.696713	11.3014	0.167632	2.50071	10.7062	8.23678	8.83317
19	2018	Guangdong	0.72772	11.3669	0.161694	2.50902	10.7434	8.22919	8.84793
19	2019	Guangdong	0.74323	11.4529	0.160655	2.51782	10.7617	8.20934	8.85295
19	2020	Guangdong	0.768832	11.3875	0.157373	2.52017	10.8373	7.88495	8.85922
19	2021	Guangdong	0.786032	11.4956	0.146716	2.51471	10.8711	8.21282	8.8639
19	2022	Guangdong	0.774841	11.5318	0.143535	2.51108	10.9102	8.37582	8.83986
19	2023	Guangdong	0.758654	11.5804	0.136556	2.51708	11.0024	8.53882	8.86178
20	2011	Guangxi	0.34544	10.1396	0.217158	2.19863	9.24029	7.61159	7.9848
20	2012	Guangxi	0.446774	10.2382	0.229014	2.22539	9.41524	7.49174	7.92599
20	2013	Guangxi	0.509389	10.3334	0.222055	2.25366	9.6251	7.579	7.93102
20	2014	Guangxi	0.52952	10.407	0.222026	2.26608	9.87138	7.63463	7.93559
20	2015	Guangxi	0.570374	10.4685	0.24195	2.28897	10.1589	7.56692	7.86134
20	2016	Guangxi	0.578712	10.5461	0.242482	2.30372	10.567	7.77292	7.85671
20	2017	Guangxi	0.60232	10.548	0.264994	2.3314	10.7842	7.88127	7.8501
20	2018	Guangxi	0.621368	10.6332	0.260938	2.35119	10.9102	8.00233	7.84854
20	2019	Guangxi	0.642398	10.6681	0.275506	2.34898	10.9742	8.1137	7.84698
20	2020	Guangxi	0.653131	10.6989	0.278899	2.35179	11.0151	7.3743	7.84698
20	2021	Guangxi	0.680592	10.8038	0.234694	2.34085	11.0333	7.9616	7.84149
20	2022	Guangxi	0.688342	10.8621	0.224073	2.33704	11.0414	7.96772	7.82724
20	2023	Guangxi	0.681792	10.8968	0.224295	2.34342	11.0259	7.97384	7.83558
21	2011	Hainan	0.313767	10.2715	0.308722	2.21077	8.67914	7.79198	6.14249
21	2012	Hainan	0.389984	10.3852	0.319265	2.24177	9.02546	8.00495	6.16521
21	2013	Hainan	0.437503	10.4819	0.318223	2.29455	9.2687	8.1708	6.19555
21	2014	Hainan	0.449572	10.5694	0.314147	2.30041	9.42109	8.04848	6.22277
21	2015	Hainan	0.489879	10.6169	0.334731	2.31621	9.50241	8.18497	6.2359
21	2016	Hainan	0.48872	10.6998	0.339603	2.32683	9.62404	8.08916	6.24055
21	2017	Hainan	0.507106	10.7879	0.323576	2.35037	9.71002	8.49463	6.26505
21	2018	Hainan	0.531365	10.8581	0.350017	2.38398	9.72418	8.80381	6.2832
21	2019	Hainan	0.544183	10.9421	0.350089	2.39193	9.66998	8.40429	6.28434
21	2020	Hainan	0.555178	10.9175	0.356529	2.3992	9.65284	8.17007	6.29342
21	2021	Hainan	0.57179	11.062	0.304449	2.42346	9.63815	8.49068	6.29895
21	2022	Hainan	0.577801	11.1065	0.307613	2.39848	9.62112	8.74438	6.27476
21	2023	Hainan	0.575853	11.1976	0.297828	2.40893	9.60596	8.99808	6.31355
22	2011	Chongqing	0.327011	10.4487	0.256732	2.39382	9.50844	7.0449	7.36963
22	2012	Chongqing	0.424366	10.5691	0.267	2.39049	9.68053	7.00643	7.38143
22	2013	Chongqing	0.485668	10.6741	0.239554	2.3958	9.84097	7.10874	7.38937
22	2014	Chongqing	0.50295	10.7758	0.231682	2.40126	10.0055	7.08504	7.39764
22	2015	Chongqing	0.540618	10.8652	0.241263	2.41751	10.1571	7.27951	7.40696
22	2016	Chongqing	0.546641	10.9768	0.225574	2.43189	10.2767	7.43066	7.41356
22	2017	Chongqing	0.558412	11.0579	0.223235	2.45146	10.366	7.41747	7.41417
22	2018	Chongqing	0.576049	11.0964	0.222998	2.4627	10.4489	7.38467	7.41652
22	2019	Chongqing	0.597763	11.2362	0.20536	2.47067	10.4891	7.60977	7.41948
22	2020	Chongqing	0.607909	11.2666	0.195736	2.45783	10.5249	7.50293	7.42417
22	2021	Chongqing	0.623472	11.3723	0.173337	2.46358	10.5192	7.96932	7.41938
22	2022	Chongqing	0.628995	11.4149	0.167969	2.47255	10.5025	7.82954	7.40489
22	2023	Chongqing	0.629171	11.4526	0.175963	2.47427	10.4937	7.68976	7.41578
23	2011	Sichuan	0.387984	10.171	0.222333	2.25307	9.95925	7.29423	8.44462
23	2012	Sichuan	0.498997	10.2958	0.228335	2.2678	10.2503	7.20344	8.44139
23	2013	Sichuan	0.560347	10.3926	0.235711	2.28601	10.5209	6.95388	8.44118
23	2014	Sichuan	0.572147	10.4668	0.238171	2.30318	10.7663	6.98789	8.44204
23	2015	Sichuan	0.62582	10.5126	0.249475	2.3239	10.9679	7.11541	8.44505
23	2016	Sichuan	0.630927	10.5967	0.243176	2.35871	11.2115	7.06333	8.44613
23	2017	Sichuan	0.666893	10.7066	0.235119	2.39074	11.3947	7.25853	8.44827
23	2018	Sichuan	0.688017	10.7972	0.238642	2.41933	11.5027	7.11417	8.45319
23	2019	Sichuan	0.701555	10.9291	0.221988	2.42189	11.5421	7.23995	8.45829
23	2020	Sichuan	0.72499	10.9704	0.230429	2.40993	11.569	7.18938	8.46485
23	2021	Sichuan	0.747293	11.0717	0.208273	2.42179	11.5729	7.52317	8.46105
23	2022	Sichuan	0.746861	11.124	0.209951	2.4255	11.5682	7.46438	8.45659
23	2023	Sichuan	0.752667	11.1821	0.211744	2.44423	11.5752	7.40559	8.45999
24	2011	Guizhou	0.281633	9.70583	0.394504	2.34858	9.09504	6.40904	7.49153
24	2012	Guizhou	0.411024	9.88888	0.40216	2.34118	9.52493	6.5198	7.50978
24	2013	Guizhou	0.471131	10.0498	0.381193	2.35158	9.82379	6.819	7.53059
24	2014	Guizhou	0.507285	10.1825	0.382328	2.3301	10.1051	6.72903	7.5547
24	2015	Guizhou	0.550338	10.3038	0.375099	2.30645	10.3632	6.73306	7.57387
24	2016	Guizhou	0.562861	10.4117	0.361931	2.30526	10.7563	6.74321	7.59273
24	2017	Guizhou	0.582218	10.5442	0.340638	2.33591	10.9961	7.06267	7.61244
24	2018	Guizhou	0.601017	10.6273	0.339695	2.36051	11.1187	6.95125	7.54221
24	2019	Guizhou	0.615937	10.7458	0.354739	2.37192	11.1005	6.83571	7.54327
24	2020	Guizhou	0.630181	10.7422	0.321963	2.36492	11.0762	6.63115	7.54539
24	2021	Guizhou	0.648501	10.8358	0.285403	2.36726	11.0604	7.27686	7.54221
24	2022	Guizhou	0.645189	10.8652	0.29018	2.36147	11.0599	7.38968	7.53796
24	2023	Guizhou	0.638495	10.8999	0.296639	2.37359	11.0596	7.5025	7.54115
25	2011	Yunnan	0.316418	9.86605	0.329423	2.30647	9.40269	6.63084	7.95297
25	2012	Yunnan	0.443259	10.0076	0.346541	2.30261	9.71257	6.66042	7.9498
25	2013	Yunnan	0.51313	10.1394	0.346214	2.31718	10.0234	6.8508	7.9498
25	2014	Yunnan	0.530783	10.2133	0.346322	2.33116	10.3179	6.80921	7.95823
25	2015	Yunnan	0.571347	10.2683	0.346044	2.35493	10.528	6.84397	7.94556
25	2016	Yunnan	0.582257	10.3447	0.339378	2.37697	10.7371	6.87653	7.95683
25	2017	Yunnan	0.597992	10.4406	0.348855	2.40525	10.8731	7.09439	7.94839
25	2018	Yunnan	0.621826	10.5223	0.339745	2.41263	10.989	7.21267	7.9452
25	2019	Yunnan	0.634925	10.7778	0.291516	2.39132	11.0286	7.2131	7.94165
25	2020	Yunnan	0.662315	10.8585	0.2844	2.36427	11.0587	6.88267	7.93952
25	2021	Yunnan	0.682086	10.9628	0.244388	2.36676	11.0934	7.421	7.92805
25	2022	Yunnan	0.682724	11.0303	0.231393	2.36532	11.1228	7.4674	7.91389
25	2023	Yunnan	0.672996	11.0683	0.224178	2.37812	11.1428	7.5138	7.91863
26	2011	Shaanxi	0.346999	10.4182	0.234234	2.27236	9.62126	7.96348	7.64348
26	2012	Shaanxi	0.444394	10.5601	0.229962	2.2758	9.95318	7.93084	7.6454
26	2013	Shaanxi	0.503902	10.6717	0.226163	2.28672	10.2522	8.18379	7.64492
26	2014	Shaanxi	0.522062	10.7564	0.223997	2.30017	10.5036	8.08267	7.65017
26	2015	Shaanxi	0.55379	10.7711	0.24282	2.33716	10.6731	8.06139	7.65302
26	2016	Shaanxi	0.566825	10.8399	0.226261	2.35426	10.8749	8.0275	7.65492
26	2017	Shaanxi	0.585978	10.9555	0.220706	2.36683	11.0596	7.79762	7.65492
26	2018	Shaanxi	0.613991	11.0584	0.216972	2.37868	11.149	8.18746	7.65539
26	2019	Shaanxi	0.643575	11.1072	0.221707	2.38892	11.1706	8.44201	7.65634
26	2020	Shaanxi	0.66066	11.1018	0.226505	2.39427	11.1999	7.89114	7.65207
26	2021	Shaanxi	0.679374	11.23	0.203658	2.37459	11.2255	8.23331	7.6454
26	2022	Shaanxi	0.672598	11.325	0.206299	2.35785	11.2365	8.26664	7.63337
26	2023	Shaanxi	0.674788	11.3557	0.212368	2.36754	11.2076	8.29997	7.64252
27	2011	Gansu	0.285786	9.88303	0.356794	2.30665	9.18482	7.03124	7.22911
27	2012	Gansu	0.407121	9.9978	0.364512	2.31856	9.68558	7.25954	7.21377
27	2013	Gansu	0.470296	10.108	0.36483	2.33657	10.3612	7.13525	7.20934
27	2014	Gansu	0.496625	10.1824	0.371736	2.35343	10.7308	7.08066	7.20638
27	2015	Gansu	0.53939	10.1722	0.435666	2.39417	11.0041	6.94212	7.20489
27	2016	Gansu	0.533462	10.2271	0.437482	2.40868	11.2356	7.15319	7.20117
27	2017	Gansu	0.557453	10.2575	0.44296	2.42275	11.3434	7.06121	7.19818
27	2018	Gansu	0.578662	10.3525	0.457458	2.43068	11.5242	7.12942	7.19818
27	2019	Gansu	0.596636	10.4041	0.453254	2.42867	11.4597	7.2447	7.19519
27	2020	Gansu	0.612528	10.4911	0.461743	2.42077	11.4685	6.81519	7.19369
27	2021	Gansu	0.635267	10.6224	0.393678	2.39555	11.4845	7.05167	7.18463
27	2022	Gansu	0.638781	10.7137	0.380049	2.37708	11.4997	7.05341	7.17549
27	2023	Gansu	0.633633	10.7762	0.381144	2.37936	11.4889	7.05515	7.18235
28	2011	Qinghai	0.239227	10.2929	0.579171	2.37347	8.29779	6.14561	5.71703
28	2012	Qinghai	0.312651	10.4097	0.612107	2.36631	8.61957	6.00395	5.70044
28	2013	Qinghai	0.378415	10.5153	0.578706	2.36357	8.94664	6.23458	5.69036
28	2014	Qinghai	0.397841	10.5884	0.584995	2.37944	9.2194	6.23868	5.68017
28	2015	Qinghai	0.437824	10.6275	0.626863	2.41377	9.43108	5.84764	5.67675
28	2016	Qinghai	0.438186	10.6812	0.592733	2.41985	9.63207	6.35718	5.66643
28	2017	Qinghai	0.460215	10.693	0.583063	2.41077	9.71854	6.687	5.65948
28	2018	Qinghai	0.474678	10.7725	0.574973	2.40688	9.74197	6.66699	5.65249
28	2019	Qinghai	0.486729	10.7992	0.628355	2.40237	9.73655	6.50337	5.64191
28	2020	Qinghai	0.505753	10.836	0.643011	2.39557	9.73979	6.20204	5.63121
28	2021	Qinghai	0.519266	10.9402	0.55415	2.38785	9.76629	6.40989	5.62402
28	2022	Qinghai	0.520226	11.0141	0.547104	2.3515	9.76732	6.44818	5.54518
28	2023	Qinghai	0.521721	11.0651	0.576115	2.37167	9.74864	6.48647	5.60212
29	2011	Ningxia	0.254299	10.4056	0.335794	2.34269	8.23244	7.30898	5.84932
29	2012	Ningxia	0.34226	10.5022	0.369182	2.35687	8.57641	7.18518	5.84064
29	2013	Ningxia	0.391932	10.5869	0.357888	2.36379	8.99206	7.20177	5.84354
29	2014	Ningxia	0.407536	10.6415	0.363522	2.37459	9.24696	7.19614	5.84064
29	2015	Ningxia	0.446818	10.6875	0.390996	2.38342	9.40566	7.12607	5.83773
29	2016	Ningxia	0.437804	10.762	0.39593	2.40257	9.59329	7.37128	5.83773
29	2017	Ningxia	0.459687	10.835	0.398651	2.40406	9.73791	7.21662	5.84064
29	2018	Ningxia	0.472204	10.8985	0.382994	2.41687	9.76978	7.11644	5.84354
29	2019	Ningxia	0.489354	10.9007	0.3837	2.42721	9.73044	7.31982	5.83773
29	2020	Ningxia	0.502397	10.9065	0.37759	2.41733	9.69264	7.14923	5.84064
29	2021	Ningxia	0.521001	11.0437	0.315744	2.38355	9.62371	7.47562	5.84354
29	2022	Ningxia	0.524861	11.1531	0.31321	2.36252	9.55258	7.29275	5.81711
29	2023	Ningxia	0.521104	11.1976	0.329516	2.37089	9.48113	7.10988	5.83188
30	2011	Xinjiang	0.284984	10.3118	0.345609	2.20579	8.72242	7.59493	7.11883
30	2012	Xinjiang	0.434583	10.4281	0.362419	2.2264	9.14783	7.632	7.12769
30	2013	Xinjiang	0.511722	10.5335	0.363238	2.26926	9.68465	7.87871	7.13887
30	2014	Xinjiang	0.520268	10.6127	0.357773	2.28299	10.0522	7.96905	7.14283
30	2015	Xinjiang	0.565999	10.5975	0.408038	2.32682	10.251	7.86552	7.16395
30	2016	Xinjiang	0.56291	10.6106	0.428848	2.33628	10.4452	7.75491	7.18539
30	2017	Xinjiang	0.58957	10.7131	0.42614	2.35485	10.5172	7.88863	7.19744
30	2018	Xinjiang	0.614044	10.8092	0.410888	2.37223	10.6361	7.91741	7.19369
30	2019	Xinjiang	0.639011	10.9019	0.390928	2.38605	10.6521	8.05932	7.20266
30	2020	Xinjiang	0.654652	10.8892	0.401024	2.36605	10.733	7.51723	7.21229
30	2021	Xinjiang	0.673108	11.0304	0.336402	2.32477	10.7511	7.94351	7.21524
30	2022	Xinjiang	0.680302	11.1353	0.385282	2.29498	10.7395	8.12502	7.14913
30	2023	Xinjiang	0.681853	11.2088	0.39564	2.31011	10.6691	8.30653	7.23562
